# Supplementary material
Source: PubMed Central journal article supplement (PMC3075889)
Supplement: NIHMS255340-supplement-1_si_001.pdf [file NIHMS255340-supplement-1_si_001.pdf]

**Indolyne Experimental and Computational Studies:  
Synthetic Applications and Origins of Selectivities of Nucleophilic Additions**

G-Yoon J. Im, Sarah M. Bronner, Adam E. Goetz, Robert S. Paton,  
Paul H.-Y. Cheong, K. N. Houk\* and Neil. K. Garg\*

*Department of Chemistry and Biochemistry, University of California, Los Angeles, California 90095*

Supporting Information – Table of Contents

|                                                                                                  |             |
|--------------------------------------------------------------------------------------------------|-------------|
| <b>Materials and Methods .....</b>                                                               | <b>S2</b>   |
| <b>Experimental Procedures</b>                                                                   |             |
| <b>A. Synthesis of a 4,5-indolyne precursor and synthetic applications.....</b>                  | <b>S3</b>   |
| <b>B. Stability and functionalization of indolyne precursors .....</b>                           | <b>S4</b>   |
| <b>C. Generation and trapping of 5,6- and 6,7-indolynes.....</b>                                 | <b>S11</b>  |
| <b>D. Indolyne precursors with alternative N-substituents.....</b>                               | <b>S14</b>  |
| <b>E. Regioselectivity in nucleophilic additions to indolynes.....</b>                           | <b>S33</b>  |
| <b>F. Influence of N-substituents on the regioselectivity of indolyne reactions.....</b>         | <b>S34</b>  |
| <b>G. Influence of C3 halide substituent on the regioselectivities of 4,5-indolyne reactions</b> | <b>S51</b>  |
| <b><sup>1</sup>H NMR Spectra.....</b>                                                            | <b>S52</b>  |
| <b><sup>13</sup>C NMR Spectra.....</b>                                                           | <b>S110</b> |
| <b>References .....</b>                                                                          | <b>S169</b> |

**Full reference 35:**

Gaussian 09, Revision A.02, M. J. Frisch, G. W. Trucks, H. B. Schlegel, G. E. Scuseria, M. A. Robb, J. R. Cheeseman, G. Scalmani, V. Barone, B. Mennucci, G. A. Petersson, H. Nakatsuji, M. Caricato, X. Li, H. P. Hratchian, A. F. Izmaylov, J. Bloino, G. Zheng, J. L. Sonnenberg, M. Hada, M. Ehara, K. Toyota, R. Fukuda, J. Hasegawa, M. Ishida, T. Nakajima, Y. Honda, O. Kitao, H. Nakai, T. Vreven, J. A. Montgomery, Jr., J. E. Peralta, F. Ogliaro, M. Bearpark, J. J. Heyd, E. Brothers, K. N. Kudin, V. N. Staroverov, R. Kobayashi, J. Normand, K. Raghavachari, A. Rendell, J. C. Burant, S. S. Iyengar, J. Tomasi, M. Cossi, N. Rega, J. M. Millam, M. Klene, J. E. Knox, J. B. Cross, V. Bakken, C. Adamo, J. Jaramillo, R. Gomperts, R. E. Stratmann, O. Yazyev, A. J. Austin, R. Cammi, C. Pomelli, J. W. Ochterski, R. L. Martin, K. Morokuma, V. G. Zakrzewski, G. A. Voth, P. Salvador, J. J. Dannenberg, S. Dapprich, A. D. Daniels, O. Farkas, J. B. Foresman, J. V. Ortiz, J. Cioslowski, and D. J. Fox, Gaussian, Inc., Wallingford CT, 2009.

**Materials and Methods.** Unless stated otherwise, reactions were conducted in flame-dried glassware under an atmosphere of nitrogen using anhydrous solvents (either freshly distilled or passed through activated alumina columns). All commercially obtained reagents were used as received unless otherwise specified. Cesium fluoride (CsF) was obtained from Strem Chemicals. 6-Benzyloxyindole was obtained from Combi-Blocks, Inc. The following reagents were distilled prior to use: chlorotrimethylsilane (TMSCl), trimethylsilyl trifluoromethanesulfonate (TMSOTf), *tert*-butyldimethylsilyl trifluoromethanesulfonate (TBSOTf), and tetramethylethylenediamine (TMEDA); triethylamine (Et<sub>3</sub>N) was distilled from calcium hydride; 1,2-dibromoethane was purified by successive aqueous washes (12 M HCl, H<sub>2</sub>O, and saturated sodium bicarbonate), dried over CaCl<sub>2</sub>, and then distilled neat; 1,4-dioxane was degassed (two freeze-pump-thaw cycles), and then distilled over sodium metal. 2-Isopropoxy-4,4,5,5-tetramethyl-1,3,2-dioxaborolane was dried over 3 Å molecular sieves. Diethylamine (Et<sub>2</sub>NH) was stirred over KOH for 1 h and then passed over basic Brockman Grade I 58 Å activated alumina prior to use. Aniline was passed over neutral Brockman Grade I 58 Å activated alumina prior to use. DMSO, *n*-pentane, and furan were dried over MgSO<sub>4</sub>. Reaction temperatures were controlled using an IKA Mag temperature modulator, and unless stated otherwise, reactions were performed at room temperature (rt, approximately 23 °C). Thin-layer chromatography (TLC) was conducted with EMD gel 60 F254 pre-coated plates (0.25 mm) and visualized using a combination of UV, anisaldehyde, iodine, vanillin, and potassium permanganate staining. Silicycle Siliaflash P60 (particle size 0.040–0.063 mm) was used for flash column chromatography. <sup>1</sup>H NMR and 2D-NOESY spectra were recorded on Bruker spectrometers (at 300 MHz or 500 MHz) and are reported relative to deuterated solvent signals. Data for <sup>1</sup>H NMR spectra are reported as follows: chemical shift (δ ppm), multiplicity, coupling constant (Hz) and integration. <sup>13</sup>C NMR spectra were recorded on Bruker Spectrometers (at 75 or 125 MHz). Data for <sup>13</sup>C NMR spectra are reported in terms of chemical shift, and when necessary, multiplicity, coupling constant (Hz) and carbon type. IR spectra were recorded on a Perkin-Elmer 100 spectrometer and are reported in terms of frequency of absorption (cm<sup>-1</sup>). High resolution mass spectra were obtained from the UC Irvine Mass Spectrometry Facility.

## **Experimental Procedures.**

### **A. Synthesis of a 4,5-indolyne precursor and synthetic applications**

Supporting information for the synthesis of silyltriflate **27** and its synthetic applications has previously been reported in an earlier publication from our laboratory.<sup>1</sup>

## B. Stability and functionalization of indolyne precursors

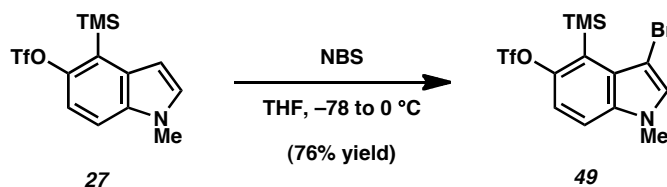

**3-Bromo silyltriflate 49.** To a solution of silyltriflate **27** (69.1 mg, 0.20 mmol) in THF (2 mL) at -78 °C was added NBS (39.2 mg, 0.22 mmol, 1.1 equiv). After stirring for 5 min, the reaction was allowed to warm to 0 °C over 5 min. The reaction mixture was quenched with aqueous Na<sub>2</sub>S<sub>2</sub>O<sub>5</sub> (5 mL), further diluted with Et<sub>2</sub>O (5 mL), and allowed to warm to 23 °C. The layers were separated and the aqueous layer was extracted with Et<sub>2</sub>O (2 × 5 mL). The combined organic layers were dried over Na<sub>2</sub>SO<sub>4</sub>. Evaporation under reduced pressure afforded the crude product, which was further purified by flash chromatography (8:1 Hexanes:EtOAc) to give 3-bromo silyltriflate **49** (64.2 mg, 76% yield) as a white crystalline solid. *R*<sub>f</sub> 0.43 (4:1 Hexanes:EtOAc); <sup>1</sup>H NMR (500 MHz, C<sub>6</sub>D<sub>6</sub>): δ 7.04 (d, *J* = 9.0, 1H), 6.53 (d, *J* = 9.0, 1H), 6.39 (s, 1H), 2.56 (s, 3H), 0.77 (s, 9H); <sup>13</sup>C NMR (125 MHz, C<sub>6</sub>D<sub>6</sub>): δ 149.0, 134.6, 131.8, 130.7, 125.0, 118.9 (q, *J* = 319, CF<sub>3</sub>), 115.4, 111.9, 89.2, 31.6, 3.4; IR (film): 1415, 1397, 1212, 1131 cm<sup>-1</sup>; HRMS-ESI (*m/z*) [M + H]<sup>+</sup> calculated for C<sub>13</sub>H<sub>16</sub>BrF<sub>3</sub>NO<sub>3</sub>SSi, 429.9756; found, 429.9738.

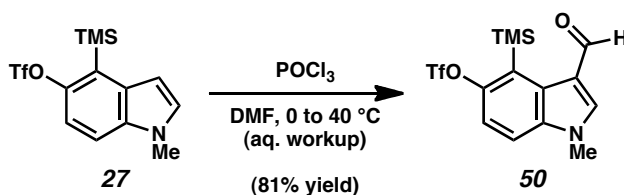

**3-Formyl silyltriflate 50:** To a vial containing DMF (1.5 mL) at 0 °C was added POCl<sub>3</sub> (150 μL, 1.61 mmol, 2.5 equiv). After stirring for 5 min, silyltriflate **27** (223.4 mg, 0.64 mmol) was added as a solution in DMF (1.25 mL), and the reaction was allowed to warm to 23 °C. After stirring for 45 min, the reaction vessel was placed in an aluminum heating block maintained at 40 °C. After stirring for an additional 45 min, the reaction was cooled to 23 °C and saturated

aqueous  $\text{NaHCO}_3$  (7 mL) was added. The reaction mixture was stirred at 23 °C for 3.3 h, then diluted with  $\text{Et}_2\text{O}$  (15 mL). The layers were separated, and then the aqueous layer was extracted with  $\text{Et}_2\text{O}$  ( $2 \times 15$  mL). The combined organic layers were washed with brine (5 mL), then dried over  $\text{Na}_2\text{SO}_4$ . Evaporation under reduced pressure afforded 3-formyl silyltriflate **50** (194.6 mg, 81% yield), which was used in the subsequent step without further purification.  $R_f$  0.42 (1:1 Hexanes:EtOAc);  $^1\text{H}$  NMR (500 MHz,  $\text{CDCl}_3$ ):  $\delta$  10.11 (s, 1H), 7.95 (s, 1H), 7.41 (d,  $J = 9.0$ , 1H), 7.23 (d,  $J = 9.0$ , 1H), 3.89 (s, 3H), 0.51 (s, 9H);  $^{13}\text{C}$  NMR (125 MHz,  $\text{CDCl}_3$ ):  $\delta$  184.9, 150.9, 139.3, 136.3, 130.6, 127.0, 120.4, 118.8 (q,  $J = 318$ ,  $\text{CF}_3$ ), 116.9, 112.9, 34.2, 2.0; IR (film): 3063, 2952, 1663, 1527, 1414, 1202, 1132  $\text{cm}^{-1}$ ; HRMS-ESI ( $m/z$ )  $[\text{M} + \text{Na}]^+$  calculated for  $\text{C}_{14}\text{H}_{16}\text{F}_3\text{NO}_4\text{SSiNa}$ , 402.0419; found, 402.0424.

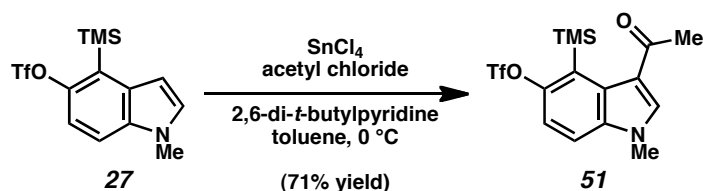

**3-Acetyl silyltriflate 51.** To a solution of silyltriflate **27** (1 g, 2.85 mmol) and 2,6-di-*t*-butylpyridine (700  $\mu\text{L}$ , 3.24 mmol, 1.1 equiv) in toluene (26 mL) at 0 °C was added sequentially acetyl chloride (370  $\mu\text{L}$ , 5.20 mmol, 1.8 equiv) and a solution of  $\text{SnCl}_4$  in  $\text{CH}_2\text{Cl}_2$  (1 M, 5.25 mL, 5.25 mmol, 1.8 equiv). The resulting mixture was stirred for 30 min, poured into a 23 °C solution of saturated aqueous  $\text{NaHCO}_3$  (25 mL), and further diluted with brine (25 mL). The layers were separated, and the aqueous layer was extracted with EtOAc ( $3 \times 25$  mL). The combined organic layers were dried over  $\text{Na}_2\text{SO}_4$ . Evaporation under reduced pressure afforded the crude product, which was further purified by flash chromatography (2:1:1 Hexanes: $\text{CH}_2\text{Cl}_2$ : $\text{Et}_2\text{O}$ ) to afford 3-acetyl silyltriflate **51** (800 mg, 71% yield) as a white solid.  $R_f$  0.44 (1:1 Hexanes:EtOAc);  $^1\text{H}$  NMR (500 MHz,  $\text{CDCl}_3$ ):  $\delta$  7.49 (s, 1H), 7.21 (d,  $J = 9.0$ , 1H), 7.13 (d,  $J = 8.5$ , 1H), 3.70 (s, 3H), 2.43 (s, 3H), 0.43 (s, 9H);  $^{13}\text{C}$  NMR (125 MHz,  $\text{CDCl}_3$ ):  $\delta$  192.2, 151.1, 137.6, 135.8, 130.3, 128.8, 120.2, 118.5 (q,  $J = 318$ ,  $\text{CF}_3$ ), 116.3, 111.9, 33.6, 27.4, 2.0; IR (film): 2956, 1647, 1525, 1406, 1212, 1198  $\text{cm}^{-1}$ ; HRMS-ESI ( $m/z$ )  $[\text{M} + \text{Na}]^+$  calculated for  $\text{C}_{15}\text{H}_{18}\text{F}_3\text{NO}_4\text{SSiNa}$ , 416.0576; found, 416.0577.

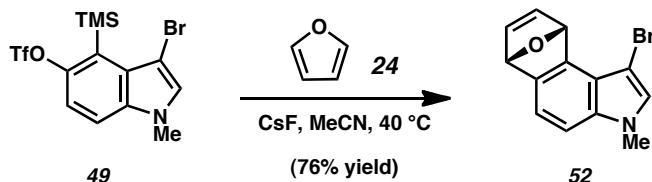

**3-Bromo Diels–Alder adduct 52.** To a solution of 3-bromo silyltriflate **49** (30.7 mg, 0.071 mmol) and furan (**24**) (26  $\mu$ L, 0.359 mmol, 5 equiv) in MeCN (0.8 mL) was added CsF (33.9 mg, 0.223 mmol, 3 equiv). The reaction vessel was placed in an aluminum heating block maintained at 40 °C for 90 min. After cooling to 23 °C, the reaction was filtered over silica gel (99:1 EtOAc:Et<sub>3</sub>N eluent). Evaporation under reduced pressure afforded the crude product, which was further purified by flash chromatography (60:20:20:1 Hexanes:CH<sub>2</sub>Cl<sub>2</sub>:Et<sub>2</sub>O:Et<sub>3</sub>N) to give Diels–Alder adduct **52** (15.0 mg, 76% yield) as a white crystalline solid. *R*<sub>f</sub> 0.38 (4:1 Hexanes:EtOAc); <sup>1</sup>H NMR (500 MHz, C<sub>6</sub>D<sub>6</sub>): 7.03 (d, *J* = 8.0, 1H), 6.92 (dd, *J* = 5.5, 1.5, 1H), 6.77 (dd, *J* = 5.5, 1.5, 1H), 6.69 (s, 1H), 6.44 (d, *J* = 8.0, 1H), 6.28 (s, 1H), 5.62 (s, 1H), 2.65 (s, 3H); <sup>13</sup>C NMR (125 MHz, CDCl<sub>3</sub>):  $\delta$  144.5, 143.4, 142.0, 141.9, 135.8, 129.6, 122.8, 115.3, 104.7, 86.5, 82.4, 80.6, 33.2; IR (film): 3116, 3017, 2919, 1523, 1290, 1279, 1042 cm<sup>-1</sup>; HRMS-ESI (*m/z*) [M + Na]<sup>+</sup> calculated for C<sub>13</sub>H<sub>10</sub>BrNONa, 297.9843; found 297.9853.

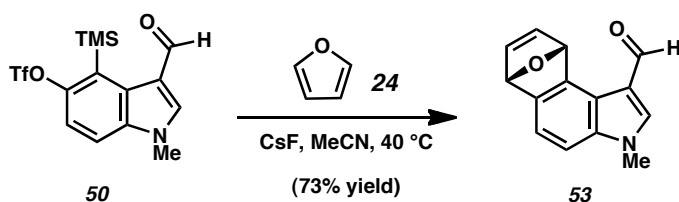

**3-Formyl Diels–Alder adduct 53.** To a solution of aldehyde **50** (32.2 mg, 0.085 mmol) and furan (**24**) (31  $\mu$ L, 0.428 mmol, 5 equiv) in MeCN (0.9 mL) was added CsF (42.0 mg, 0.276 mmol, 3 equiv). The reaction vessel was placed in an aluminum heating block maintained at 40 °C for 2 h. After cooling to 23 °C, the reaction mixture was filtered over silica gel (EtOAc eluent). Evaporation under reduced pressure afforded the crude product, which was further purified by flash chromatography (1:1 Hexanes:EtOAc) to give adduct **53** (13.9 mg, 73% yield)

as a white solid.  $R_f$  0.22 (1:1 Hexanes:EtOAc);  $^1\text{H NMR}$  (500 MHz,  $\text{CDCl}_3$ ):  $\delta$  9.86 (s, 1H), 7.66 (s, 1H), 7.32 (d,  $J = 7.5$ , 1H), 7.22 (dd,  $J = 5.4$ , 1.7, 1H), 7.09 (dd,  $J = 5.4$ , 1.6, 1H), 6.94 (d,  $J = 7.9$ , 1H), 6.69 (s, 1H), 5.84 (s, 1H), 3.81 (s, 3H);  $^{13}\text{C NMR}$  (125 MHz,  $\text{CDCl}_3$ ): (13 of 14 C),  $\delta$  183.1, 145.2, 144.3, 143.7, 141.7, 137.2, 119.3, 117.4, 116.3, 105.2, 84.0, 82.7, 33.9; IR (film): 3101, 2800, 1655, 1533  $\text{cm}^{-1}$ ; HRMS-ESI ( $m/z$ )  $[\text{M} + \text{Na}]^+$  calculated for  $\text{C}_{14}\text{H}_{11}\text{NO}_2\text{Na}$ , 248.0687; found, 248.0685.

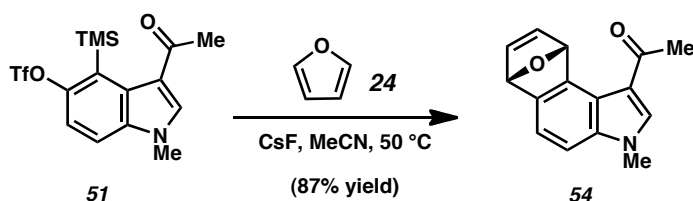

**3-Acetyl Diels–Alder adduct 54.** To a solution of ketone **51** (31.1 mg, 0.079 mmol) and furan (**24**) (30  $\mu\text{L}$ , 0.414 mmol, 5 equiv) in MeCN (0.8 mL) was added CsF (36.2 mg, 0.238 mmol, 3 equiv). The reaction vessel was placed in an aluminum heating block maintained at 50  $^\circ\text{C}$  for 130 min. After cooling to 23  $^\circ\text{C}$ , the reaction mixture was filtered over silica gel (EtOAc eluent). Evaporation under reduced pressure afforded the crude product, which was further purified by flash chromatography (1:1 Hexanes:EtOAc) to give adduct **54** (16.4 mg, 87% yield) as a white solid.  $R_f$  0.20 (1:1 Hexanes:EtOAc);  $^1\text{H NMR}$  (500 MHz,  $\text{CDCl}_3$ ):  $\delta$  7.65 (s, 1H), 7.28 (d,  $J = 7.8$ , 1H), 7.24 (dd,  $J = 5.5$ , 1.9, 1H), 7.08 (dd,  $J = 5.5$ , 1.8, 1H), 6.89 (d,  $J = 7.9$ , 1H), 6.81 (s, 1H), 5.81 (s, 1H), 3.76 (s, 3H), 2.47 (s, 3H);  $^{13}\text{C NMR}$  (125 MHz,  $\text{CDCl}_3$ ):  $\delta$  191.5, 144.9, 144.6, 144.5, 143.6, 137.9, 136.9, 120.6, 116.0, 115.9, 104.9, 84.4, 82.6, 33.7, 26.9; IR (film): 3013, 1635, 1533, 1454, 1374  $\text{cm}^{-1}$ ; HRMS-ESI ( $m/z$ )  $[\text{M} + \text{Na}]^+$  calculated for  $\text{C}_{15}\text{H}_{13}\text{NO}_2\text{Na}$ , 262.0844; found, 262.0844.

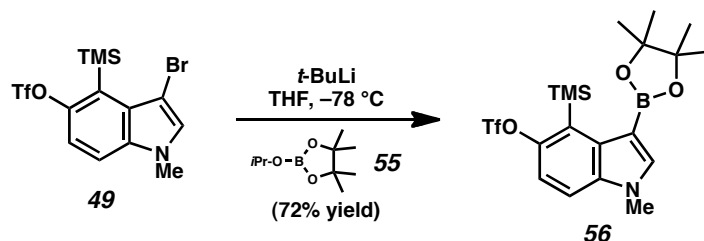

**3-Boronic ester silyltriflate 56.** To a solution of 3-bromo silyltriflate **49** (72.9 mg, 0.169 mmol) in THF (2 mL) at  $-78\text{ }^{\circ}\text{C}$  was added *t*-BuLi (550  $\mu\text{L}$ , 0.484 mmol, 2.9 equiv) dropwise over 3 min. After stirring for 20 min, boronic ester **55** (175  $\mu\text{L}$ , 0.856 mmol, 5.1 equiv) was added dropwise over 2 min. The reaction was stirred for 5.5 h, quenched with aqueous  $\text{NH}_4\text{Cl}$  (1 mL), and allowed to warm to  $23\text{ }^{\circ}\text{C}$ . The solution was further diluted with  $\text{H}_2\text{O}$  (5 mL) and  $\text{Et}_2\text{O}$  (10 mL). The layers were separated, and the aqueous layer was extracted with  $\text{Et}_2\text{O}$  ( $2 \times 10\text{ mL}$ ). The combined organic layers were dried over  $\text{Na}_2\text{SO}_4$  and concentrated under reduced pressure. The crude residue was purified by flash chromatography (12:1 Hexanes:EtOAc) to afford boronic ester **56** (58.2 mg, 72% yield) as a white solid.  $R_f$  0.34 (4:1 Hexanes:EtOAc);  $^1\text{H}$  NMR (500 MHz,  $\text{CDCl}_3$ ):  $\delta$  7.68 (s, 1H), 7.32 (d,  $J = 8.9$ , 1H), 7.13 (d,  $J = 8.9$ , 1H), 3.77 (s, 3H), 1.35 (s, 12H), 0.53 (s, 9H);  $^{13}\text{C}$  NMR (125 MHz,  $\text{CDCl}_3$ ): (12 of 13 C):  $\delta$  150.0, 142.3, 137.0, 136.2, 127.8, 118.8 (q,  $J = 318$ ,  $\text{CF}_3$ ), 115.0, 111.6, 83.3, 33.4, 25.1, 2.1; IR (film): 2987, 1516, 1415, 1217, 1132  $\text{cm}^{-1}$ ; HRMS-ESI  $[\text{M} + \text{Na}]^+$  calculated for  $\text{C}_{19}\text{H}_{27}\text{BF}_3\text{NO}_5\text{SSiNa}$ , 500.1326; found, 500.1331.

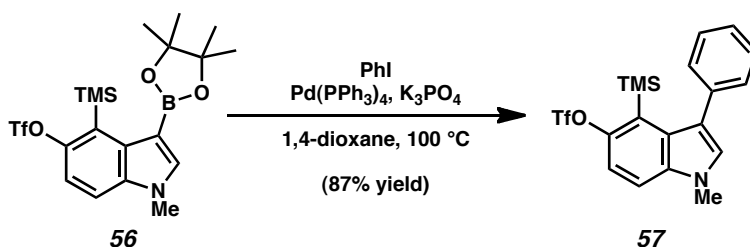

**3-Phenyl silyltriflate 57.** **57** was prepared following the general procedure described by Fürstner for cross-coupling of indolyl 3-boronic esters.<sup>2</sup> A Schlenk tube was charged with boronic ester **56** (61.1 mg, 0.128 mmol) and  $\text{K}_3\text{PO}_4$  (81.6 mg, 0.384 mmol, 3 equiv), and then brought into a glovebox. To this mixture was added  $\text{Pd}(\text{PPh}_3)_4$  (8.4 mg, 7.3  $\mu\text{mol}$ , 0.057 equiv), iodobenzene



(22  $\mu$ L, 0.197 mmol, 1.5 equiv), and 1,4-dioxane (1 mL). The vessel was sealed under inert atmosphere, removed from the glovebox, and heated to 80  $^{\circ}$ C. After 19.5 h the temperature was raised to 100  $^{\circ}$ C and maintained for 8 h. The reaction was then cooled to 23  $^{\circ}$ C, diluted with EtOAc (5 mL), and filtered over silica gel (EtOAc eluent). Evaporation under reduced pressure afforded the crude product, which was further purified by flash chromatography (8:1:1 Hexanes:Benzenes:Et<sub>2</sub>O) to afford cross-coupled product **57** (47.7 mg, 87% yield) as an off-white solid.  $R_f$  0.51 (4:1 Hexanes:EtOAc); <sup>1</sup>H NMR (500 MHz, CDCl<sub>3</sub>):  $\delta$  7.47–7.43 (m, 2H), 7.41 (app. t,  $J$  = 7.6, 2H), 7.39 (d,  $J$  = 9.0, 1H), 7.33–7.29 (m, 1H), 7.17 (d,  $J$  = 9.0, 1H), 7.16 (s, 1H), 3.83 (s, 3H), 0.12 (s, 9H); <sup>13</sup>C NMR (125 MHz, CDCl<sub>3</sub>):  $\delta$  150.4, 137.4, 135.6, 131.3, 130.9, 129.0, 128.5, 126.4, 125.9, 120.5, 118.6 (q,  $J$  = 318, CF<sub>3</sub>), 114.7, 111.8, 33.1, 1.8; IR (film): 2948, 1604, 1417, 1405, 1207  $\text{cm}^{-1}$ ; HRMS-ESI ( $m/z$ ) [ $M + H$ ]<sup>+</sup> calculated for C<sub>19</sub>H<sub>21</sub>O<sub>3</sub>NF<sub>3</sub>SSi, 428.0963; found, 428.0969.

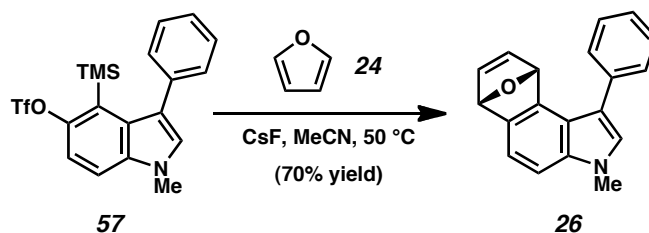

**3-Phenyl Diels–Alder adduct 26.** To a solution of silyltriflate **57** (35.9 mg, 0.084 mmol) and furan (**24**) (30  $\mu$ L, 0.414 mmol, 5 equiv) in MeCN (0.85 mL) at 23  $^{\circ}$ C was added CsF (38.2 mg, 0.251 mmol, 3 equiv). The reaction vessel was placed in an aluminum heating block maintained at 50  $^{\circ}$ C for 6.25 h. After cooling to 23  $^{\circ}$ C, the reaction mixture was filtered over silica gel (EtOAc eluent). Evaporation under reduced pressure afforded the crude product, which was further purified by flash chromatography (6:1 Hexanes:EtOAc) to give adduct **26** (16.1 mg, 70% yield) as a white solid.  $R_f$  0.37 (6:1 Hexanes:EtOAc); <sup>1</sup>H NMR (500 MHz, CDCl<sub>3</sub>):  $\delta$  7.52–7.50 (m, 2H), 7.49–7.45 (m, 2H), 7.36–7.32 (m, 1H), 7.29 (d,  $J$  = 8.0, 1H), 7.20 (app. t,  $J$  = 1.0, 2H), 7.12 (s, 1H), 6.96 (d,  $J$  = 8.0, 1H), 6.02 (s, 1H), 6.84 (d,  $J$  = 1.0, 1H), 3.78 (s, 3H); <sup>13</sup>C NMR (125 MHz, CDCl<sub>3</sub>):  $\delta$  145.2, 142.4, 142.0, 141.2, 136.7, 135.7, 128.52, 128.48, 128.4, 126.1, 122.2, 115.6, 114.7, 104.5, 82.6, 81.9, 33.1; IR (film): 3021, 2922, 1601, 1549, 1456, 1416, 1214

cm<sup>-1</sup>; HRMS-ESI [M + Na]<sup>+</sup> calculated for C<sub>19</sub>H<sub>15</sub>NONa, 296.1051; found, 296.1056.

### C. Generation and trapping of 5,6- and 6,7-indolynes

Supporting information for the synthesis of *N*-methyl silyltriflates **59** and **68**, and their reactions with various nucleophiles has previously been reported in earlier publications from our laboratory.<sup>1,3</sup>

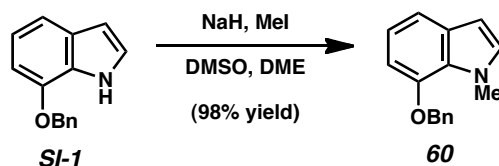

***N*-Methyl-benzyloxyindole 60.** Benzyloxyindole **60** was prepared following a known procedure, with minor modifications.<sup>4</sup> 95% NaH (0.23 g, 9.0 mmol, 2 equiv) was added to a solution of 7-benzyloxyindole (**SI-1**) (1.0 g, 4.5 mmol) in 1,2-dimethoxyethane (12.4 mL) and DMSO (1.4 mL). The resulting solution was stirred at 23 °C for 40 min, then MeI (0.42 mL, 6.7 mmol, 1.5 equiv) was added dropwise over 1 min. The resulting mixture was stirred for 1.5 h, then quenched with H<sub>2</sub>O (4 mL), then brine (4 mL). The biphasic mixture was further diluted with H<sub>2</sub>O (20 mL) and EtOAc (20 mL). The layers were separated, and then the aqueous layer was extracted with EtOAc (2 × 20 mL). The combined organic layers were washed with brine (20 mL), then dried over MgSO<sub>4</sub>. Evaporation under reduced pressure afforded crude **60** (1.04 g, 98% yield) as a red oil, which was used in the subsequent step without further purification. *R*<sub>f</sub> 0.67 (3:1 Hexanes:EtOAc); <sup>1</sup>H NMR (500 MHz, CDCl<sub>3</sub>) δ: 7.51 (d, *J* = 7.3, 2H), 7.44–7.41 (m, 2H), 7.38–7.35 (m, 1H), 7.25 (d, *J* = 7.9, 1H), 6.99 (app. t, *J* = 8.2, 1H), 6.94 (d, *J* = 3.0, 1H), 6.71 (d, *J* = 7.7, 1H), 6.44 (d, *J* = 2.9, 1H), 5.20 (s, 2H), 4.06 (s, 3H); <sup>13</sup>C NMR (125 MHz, CDCl<sub>3</sub>): δ 146.9, 137.2, 131.0, 129.8, 128.5, 127.8, 127.4, 126.4, 119.7, 114.0, 103.4, 100.9, 70.3, 36.6; IR (film): 3064, 3030, 2953, 2923, 1575, 1258 cm<sup>-1</sup>; HRMS-ESI (*m/z*) [M + H]<sup>+</sup> calcd for C<sub>16</sub>H<sub>16</sub>NO, 238.1232; found, 238.1236.

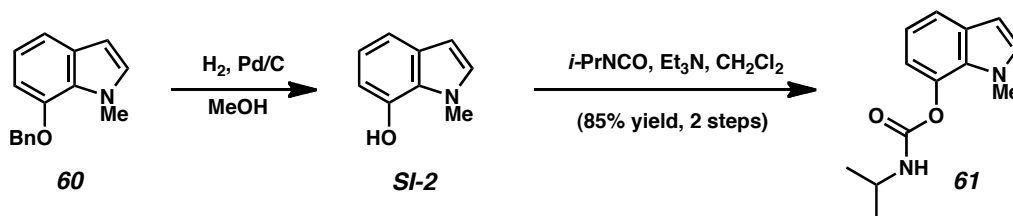

**Carbamate 61.** *N*-Methyl-benzyloxyindole **60** (0.50 g, 2.1 mmol) was dissolved in MeOH (4.9 mL) and 10% Pd/C (0.11 g, 0.11 mmol, 5.0 mol% Pd) was added.<sup>5</sup> The mixture was placed under an atmosphere of hydrogen (double-balloon), stirred for 11 h at 23 °C, and then filtered over celite (MeOH eluent, 200 mL). Evaporation of the solvent under reduced pressure afforded hydroxyindole **SI-2** (0.30 g, crude) as a grey solid, which was used in the subsequent step without further purification.  $R_f$  0.41 (3:1 Hexanes:EtOAc).

To a solution of crude **SI-2** in CH<sub>2</sub>Cl<sub>2</sub> (5 mL) were added sequentially *i*-PrNCO (0.59 mL, 6.0 mmol, 3 equiv) and Et<sub>3</sub>N (0.084 mL, 0.6 mmol, 0.3 equiv). The solution was stirred at 23 °C for 9 h, then concentrated to dryness under reduced pressure. Purification by flash chromatography (3:1 Hexanes:EtOAc) provided carbamate **61** (0.41 g, 85% yield, 2 steps).  $R_f$  0.21 (3:1 Hexanes:EtOAc); <sup>1</sup>H NMR (500 MHz, CDCl<sub>3</sub>): δ 7.44 (d,  $J$  = 7.9, 1H), 7.02 (app. t,  $J$  = 7.7, 1H), 6.93 (d,  $J$  = 2.9, 1H), 6.90 (d,  $J$  = 7.6, 1H), 6.45 (d,  $J$  = 3.0, 1H), 4.96 (s, 1H), 3.98–3.87 (m, 4H), 1.26 (d,  $J$  = 6.5, 6H); <sup>13</sup>C NMR (125 MHz, CDCl<sub>3</sub>): δ 154.1, 136.8, 131.9, 130.3, 128.8, 119.4, 118.4, 115.2, 101.3, 43.5, 35.4, 22.9; IR (film): 3333, 2978, 1696, 1517 cm<sup>-1</sup>; HRMS-ESI ( $m/z$ ) [M + Na]<sup>+</sup> calcd for C<sub>13</sub>H<sub>16</sub>N<sub>2</sub>O<sub>2</sub>Na, 255.1109; found, 255.1116.

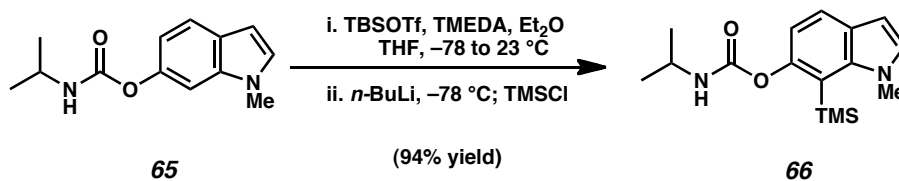

**Silyl carbamate 66.** To a solution of carbamate **65**<sup>3</sup> (146.4 mg, 0.630 mmol) in 3:1 Et<sub>2</sub>O:THF (6.05 mL) at –78 °C was added TMEDA (0.132 mL, 0.882 mmol, 1.40 equiv), followed by a solution of TBSOTf in *n*-pentane (1.30 M, 0.573 mL, 0.756 mmol, 1.2 equiv).<sup>6,7,8</sup> After stirring for 30 min, the white suspension was allowed to warm to 23 °C over 80 min, by which time

TMEDA·TfOH had formed as an oil on the bottom of the flask. TMEDA (0.329 mL, 2.21 mmol, 3.5 equiv) was added, and the mixture was cooled to  $-78\text{ }^{\circ}\text{C}$ .<sup>9</sup> A solution of *n*-BuLi in hexanes (1.85 M, 1.19 mL, 2.21 mmol, 3.5 equiv) was added dropwise over 5 min.<sup>10</sup> The mixture was stirred at  $-78\text{ }^{\circ}\text{C}$  for 3 h, then neat TMSCl (0.560 mL, 4.41 mmol, 7.0 equiv) was added dropwise over 5 min. The resulting mixture was stirred at  $-78\text{ }^{\circ}\text{C}$  for 2 h, quenched with 0.5 M aqueous NaHSO<sub>4</sub> (5 mL), and allowed to warm to  $23\text{ }^{\circ}\text{C}$  over 1 h with vigorous stirring. The organic layer was separated, and then the aqueous layer was extracted with Et<sub>2</sub>O (5 mL). The combined organic layers were washed successively with 0.5 M aqueous NaHSO<sub>4</sub> (5 mL) and brine (5 mL), then dried over Na<sub>2</sub>SO<sub>4</sub>. Evaporation under reduced pressure afforded the crude product, which was purified by flash chromatography (6:1 Hexanes:EtOAc) to afford silylcarbamate **66** (0.180 g, 94% yield). Spectral data match those reported in a previous publication.<sup>3</sup>

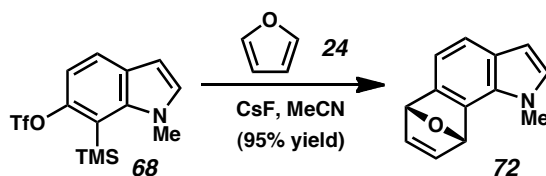

**Furan Diels–Alder adduct 72.** To a stirred solution of silyltriflate **68**<sup>3</sup> (39.4 mg, 0.1121 mmol) and furan (**24**) (40.8  $\mu\text{L}$ , 0.561 mmol, 5 equiv) in MeCN (1.1 mL) was added CsF (34.1 mg, 0.561 mmol, 2.0 equiv). The solution was stirred at  $23\text{ }^{\circ}\text{C}$  for 3 h, then filtered over silica gel (EtOAc eluent). Evaporation under reduced pressure afforded the crude product, which was further purified by flash chromatography (3:1:1 Hexanes:CH<sub>2</sub>Cl<sub>2</sub>:Et<sub>2</sub>O) to provide adduct **72** (21.1 mg, 95% yield).  $R_f$  0.33 (3:1:1 Hexanes:CH<sub>2</sub>Cl<sub>2</sub>:Et<sub>2</sub>O); <sup>1</sup>H NMR (500 MHz, CDCl<sub>3</sub>):  $\delta$  7.37 (d,  $J = 7.5$ , 1H), 7.29–7.21 (m, 2H), 7.22 (dd,  $J = 5.5, 1.5$ , 1H), 7.07 (d,  $J = 3.0$ , 1H), 6.54 (d,  $J = 3.0$ , 1H), 6.403–6.400 (m, 1H), 5.97 (d,  $J = 1.0$ , 1H), 4.03 (s, 3H); <sup>13</sup>C NMR (125 MHz, CDCl<sub>3</sub>):  $\delta$  144.8, 144.2, 143.4, 132.1, 131.2, 130.4, 128.9, 117.2, 113.2, 101.6, 83.0, 81.2, 34.9; IR (film): 3089, 3033, 2908, 1304, 1276  $\text{cm}^{-1}$ ; HRMS-ESI ( $m/z$ ) [M + Na]<sup>+</sup> calcd for C<sub>13</sub>H<sub>11</sub>NONa, 220.0738; found, 220.0737.

#### D. Indolyne precursors with alternative *N*-substituents

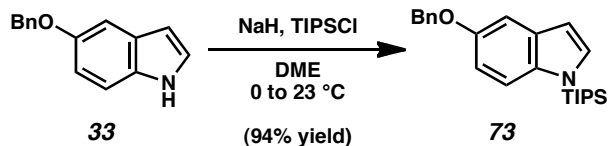

***N*-TIPS benzyloxyindole 73.** To a solution of 5-benzyloxyindole (**33**) (3.00 g, 13.4 mmol) in 1,2-dimethoxyethane (42.0 mL) at 0 °C was added 60% NaH (1.07 g, 26.9 mmol, 2 equiv). The resulting solution was stirred at 0 °C for 20 min, then TIPSCl (4.31 mL, 20.2 mmol, 1.5 equiv) was added dropwise over 5 min. The resulting mixture was removed from the bath and allowed to warm to 23 °C. After stirring for an additional 90 min, the reaction was quenched with brine (60 mL). The biphasic mixture was further diluted with EtOAc (60 mL). The layers were separated, and then the aqueous layer was extracted with EtOAc (2 × 60 mL). The combined organic layers were washed with brine (20 mL), H<sub>2</sub>O (20 mL), then dried over MgSO<sub>4</sub>. Evaporation of the solvent under reduced pressure afforded crude **73**, which was further purified by flash chromatography (3:1 Hexanes:CH<sub>2</sub>Cl<sub>2</sub>) to afford **73** (4.79 g, 94% yield) as a white solid. *R*<sub>f</sub> 0.73 (3:1 Hexanes:EtOAc); <sup>1</sup>H NMR (300 MHz, CDCl<sub>3</sub>): δ 7.60–7.30 (m, 8H), 7.02 (dd, *J* = 8.7, 2.4, 1H), 6.67 (d, *J* = 3.0, 1H), 5.18 (s, 2H), 1.75 (septet, *J* = 7.8, 3H), 1.25 (d, *J* = 7.5, 18H). <sup>13</sup>C NMR (125 MHz, CDCl<sub>3</sub>): δ 153.5, 138.0, 136.1, 132.1, 132.0, 128.6, 127.8, 127.7, 114.6, 112.1, 104.7, 103.7, 70.7, 18.2, 12.9; IR (film): 2943, 2864, 1463, 1450, 1158 cm<sup>-1</sup>; HRMS-ESI (*m/z*) [M + Na]<sup>+</sup> calcd for C<sub>24</sub>H<sub>33</sub>NOSiNa, 402.2229; found, 402.2217.

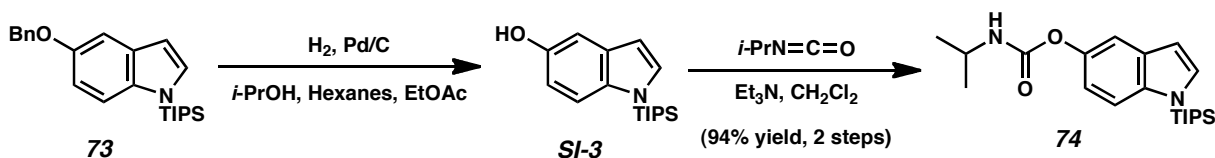

***N*-TIPS carbamate 74.** Carbamate **73** was prepared following the general procedure described by Igarashi.<sup>11</sup> To a solution of *N*-TIPS benzyloxyindole (4.79 g, 12.6 mmol) in 1:1:1 *i*-PrOH:Hexanes:EtOAc (108 mL) was added 5% Pd/C (0.67 g, 0.32 mmol, 2.5 mol% Pd). The

mixture was placed under an atmosphere of hydrogen (double-balloon), stirred for 2.5 h at 23 °C, and then filtered over celite (EtOAc eluent). Evaporation of the solvent under reduced pressure afforded crude **SI-3** as a pink solid, which was used in the subsequent step without further purification.  $R_f$  0.07 (2:1 Hexanes:CH<sub>2</sub>Cl<sub>2</sub>).

Crude **SI-3** was dissolved in CH<sub>2</sub>Cl<sub>2</sub> (63.1 mL), and Et<sub>3</sub>N (0.53 mL, 3.79 mmol, 0.3 equiv), followed by *i*-PrNCO (2.66 mL, 27.1 mmol, 2.1 equiv), was added. The solution was stirred at 23 °C for 24 h, then concentrated to dryness under reduced pressure. Purification by flash chromatography (7:3 Hexanes:Et<sub>2</sub>O) provided *N*-TIPS carbamate **74** (4.42 g, 94% yield, 2 steps).  $R_f$  0.58 (3:1 Hexanes:EtOAc); <sup>1</sup>H NMR (500 MHz, CDCl<sub>3</sub>): δ 7.45 (d, *J* = 2.0, 1H), 7.43 (d, *J* = 9.0, 1H), 7.25 (s, 1H), 6.91 (dd, *J* = 9.0, 2.0, 1H), 6.58 (d, *J* = 3.5, 1H), 4.87 (d, *J* = 7.0, 1H), 3.91 (m, 1H), 1.68 (septet, *J* = 7.5, 3H), 1.23 (d, *J* = 6.5, 6H), 1.13 (d, *J* = 7.5, 18H); <sup>13</sup>C NMR (125 MHz, CDCl<sub>3</sub>): δ 155.0, 145.0, 138.7, 132.6, 132.2, 116.0, 114.2, 112.9, 105.3, 43.7, 23.3, 18.4, 13.1; IR (film): 3281, 2955, 2868, 1712 cm<sup>-1</sup>; HRMS-ESI (*m/z*) [M + Na]<sup>+</sup> calcd for C<sub>21</sub>H<sub>34</sub>N<sub>2</sub>O<sub>2</sub>SiNa, 397.2287; found, 397.2282.

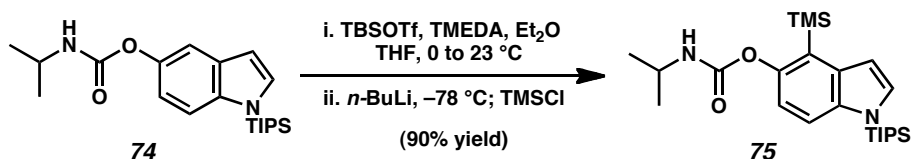

***N*-TIPS silylcarbamates 75.** Silyl carbamate **75** was prepared following the general procedure described by Hoppe and Snieckus for *o*-lithiation of isopropyl carbamates, with minor modifications.<sup>6,7</sup> To a solution of *N*-TIPS carbamate **74** (1.02 g, 2.72 mmol) and TMEDA (0.61 mL, 3.82 mmol, 1.4 equiv) in 3:1 Et<sub>2</sub>O:THF (27 mL) at 0 °C was added a solution of TBSOTf in *n*-pentane (1.30 M, 3.21 mL, 3.3 mmol, 1.2 equiv). After stirring for 5 min, the white suspension was allowed to warm to 23 °C over 30 min. TMEDA (1.53 mL, 9.56 mmol, 3.5 equiv) was added, and the mixture was cooled to -78 °C. A solution of *n*-BuLi in hexanes (2.21 M, 4.35 mL, 9.56 mmol, 3.5 equiv) was added dropwise over 8 min. The mixture was stirred at -78 °C for 3 h, then neat TMSCl (2.43 mL, 19.1 mmol, 7 equiv) was added dropwise over 15 min. The resulting mixture was stirred at -78 °C for 1 h, quenched with 1 M NaHSO<sub>4</sub> (25 mL), and

allowed to warm to 23 °C over 45 min with vigorous stirring. The organic layer was separated, washed successively with 1 M NaHSO<sub>4</sub> (25 mL) and brine (25 mL), then dried over Na<sub>2</sub>SO<sub>4</sub>. Evaporation under reduced pressure afforded the crude product, which was purified by flash chromatography (15:1:1 Hexanes:Et<sub>2</sub>O:CH<sub>2</sub>Cl<sub>2</sub>) to afford *N*-TIPS silylcarbamate **75** (1.10 g, 90% yield). *R*<sub>f</sub> 0.27 (3:1 Hexanes:EtOAc); <sup>1</sup>H NMR (500 MHz, CDCl<sub>3</sub>): δ 7.49 (d, *J* = 9.0, 1H), 7.29 (d, *J* = 3.0, 1H), 6.88 (d, *J* = 9.0, 1H), 6.79 (d, *J* = 3.5, 1H), 4.82 (d, *J* = 8, 1H), 3.98–3.92 (m, 1H), 1.69 (septet, *J* = 7.5, 3H), 1.24 (d, *J* = 6.5, 6H), 1.15 (d, *J* = 7.5, 18H), 0.44 (s, 9H); <sup>13</sup>C NMR (125 MHz, CDCl<sub>3</sub>): δ 155.1, 150.0, 138.0, 136.1, 132.1, 121.7, 116.6, 115.6, 106.6, 43.6, 23.3, 18.5, 13.1, 1.5; IR (film): 3400, 2945, 2869, 1742 cm<sup>-1</sup>; HRMS-ESI (*m/z*) [M + Na]<sup>+</sup> calcd for C<sub>24</sub>H<sub>42</sub>N<sub>2</sub>O<sub>2</sub>Si<sub>2</sub>Na, 469.2682; found, 469.2666.

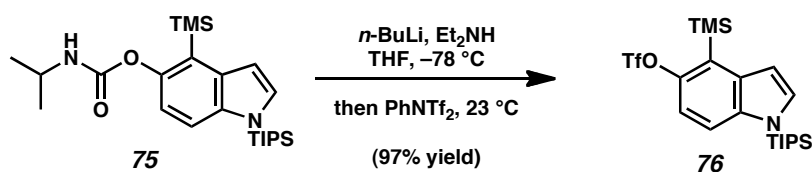

***N*-TIPS silyltriflate 76.** To a solution of silyl carbamate **75** (6.29 g, 14.1 mmol) in THF (142 mL) at -78 °C was added a solution of *n*-BuLi (1.43 M, 12.5 mL, 17.9 mmol, 1.3 equiv) dropwise over 30 min. Et<sub>2</sub>NH (1.90 mL, 18.4 mmol, 1.3 equiv) was added and the resulting mixture was stirred at -78 °C for 15 min, then allowed to warm to 23 °C over 15 min. Next, PhNTf<sub>2</sub> (7.58 g, 21.2 mmol, 1.5 equiv) was added as a solid. The mixture was allowed to stir for 2 h and then passed over a plug of silica gel (EtOAc eluent). Evaporation under reduced pressure afforded the crude product, which was further purified by flash chromatography (95:5 Hexanes:Benzene) to provide *N*-TIPS silyltriflate **76** (6.74 g, 97% yield). *R*<sub>f</sub> 0.74 (2:1 Hexanes:Et<sub>2</sub>O); <sup>1</sup>H NMR (500 MHz, CDCl<sub>3</sub>): δ 7.53 (d, *J* = 9.0, 1H), 7.38 (d, *J* = 3.0, 1H), 7.12 (d, *J* = 9.0, 1H), 6.84 (d, *J* = 3.0, 1H), 1.71 (septet, *J* = 7.5, 3H), 1.17 (d, *J* = 7.5, 18H), 0.53 (s, 9H); <sup>13</sup>C NMR (125 MHz, CDCl<sub>3</sub>): δ 149.2, 138.8, 136.5, 133.3, 123.1, 118.8 (q, *J* = 318, CF<sub>3</sub>), 115.8, 113.6, 107.2, 18.2, 13.0, 1.3; IR (film): 2955, 2872, 1411, 1391, 1401 cm<sup>-1</sup>; HRMS-ESI (*m/z*) [M + Na]<sup>+</sup> calcd for C<sub>21</sub>H<sub>34</sub>F<sub>3</sub>NO<sub>3</sub>SSi<sub>2</sub>Na, 516.1648; found, 516.1649.



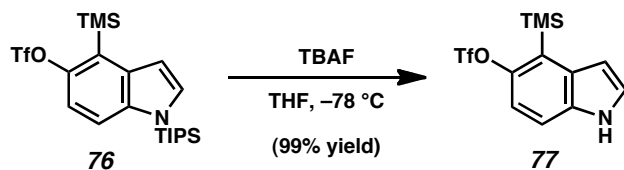

***N*-H silyltriflate 77.** To a solution of *N*-TIPS silyltriflate **76** (0.427 g, 0.865 mmol) in THF (8.9 mL) at  $-78\text{ }^{\circ}\text{C}$  was added a solution of TBAF in THF (1.0 M, 0.865 mL, 0.865 mmol, 1 equiv) dropwise over 2 min. The solution was stirred for 15 min, then quenched with  $\text{H}_2\text{O}$  (10 mL). After warming to  $23\text{ }^{\circ}\text{C}$ , the biphasic mixture was further diluted with  $\text{Et}_2\text{O}$  (10 mL). The layers were separated, and then the aqueous layer was extracted with  $\text{Et}_2\text{O}$  ( $3 \times 10\text{ mL}$ ). The combined organic layers were dried over  $\text{MgSO}_4$ . Evaporation under reduced pressure afforded the crude product, which was further purified by flash chromatography (3:1 Hexanes:EtOAc) to provide *N*-H silyltriflate **77** (289 mg, 99% yield).  $R_f$  0.37 (3:1:1 Hexanes:Et<sub>2</sub>O:CH<sub>2</sub>Cl<sub>2</sub>); <sup>1</sup>H NMR (500 MHz, CDCl<sub>3</sub>):  $\delta$  8.33 (br s, 1H), 7.35 (dd,  $J = 8.9, 0.8$ , 1H), 7.30 (app. t,  $J = 2.9$ , 1H), 7.16 (d,  $J = 8.9$ , 1H) 6.78–6.77 (m, 1H), 0.56 (s, 9H); <sup>13</sup>C NMR (125 MHz, CDCl<sub>3</sub>):  $\delta$  148.8, 133.5, 132.5, 126.1, 123.7, 118.7 (q,  $J = 319$ , CF<sub>3</sub>), 114.9, 113.2, 105.0, 1.0; IR (film): 3446, 1396, 1211  $\text{cm}^{-1}$ ; HRMS-ESI ( $m/z$ ) [ $\text{M} + \text{H}$ ]<sup>+</sup> calcd for C<sub>12</sub>H<sub>15</sub>F<sub>3</sub>NO<sub>3</sub>SSi, 338.0494; found, 338.0490.

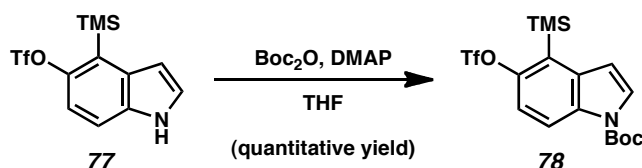

***N*-Boc silyltriflate 78.** *N*-Boc silyltriflate **78** was prepared following the general procedure described by Gribble for Boc-protection of indoles.<sup>12</sup> DMAP (5.4 mg, 0.044 mmol, 0.1 equiv) was added to a solution of *N*-H silyltriflate **77** (0.150 g, 0.44 mmol) in THF (5 mL). The resulting solution was stirred at  $23\text{ }^{\circ}\text{C}$  for 5 min, then Boc<sub>2</sub>O (97 mg, 0.44 mmol, 1 equiv) was added. The resulting mixture was stirred for 15 h, then filtered over silica gel (Et<sub>2</sub>O eluent). Evaporation under reduced pressure afforded *N*-Boc silyltriflate **78** (0.195 g, quantitative yield).  $R_f$  0.74 (3:2 Hexanes:Et<sub>2</sub>O); <sup>1</sup>H NMR (500 MHz, CDCl<sub>3</sub>):  $\delta$  8.26 (d,  $J = 9.0$ , 1H), 7.73 (d,  $J = 3.8$ , 1H), 7.27 (d,  $J = 9.1$ , 1H), 6.78 (d,  $J = 3.8$ , 1H), 1.68 (s, 9H), 0.51 (s, 9H); <sup>13</sup>C NMR (125 MHz, CDCl<sub>3</sub>):  $\delta$  150.3, 149.2, 135.9, 133.3, 127.5, 124.7, 118.7 (q,  $J = 319$ , CF<sub>3</sub>), 117.4, 116.3,

108.5, 84.4, 28.1, 1.1; IR (film): 2982, 1742, 1399, 1210  $\text{cm}^{-1}$ ; HRMS-ESI ( $m/z$ ) [ $M + \text{Na}$ ] $^+$  calcd for  $\text{C}_{17}\text{H}_{22}\text{F}_3\text{NO}_5\text{SSiNa}$ , 460.0838; found, 460.0835.

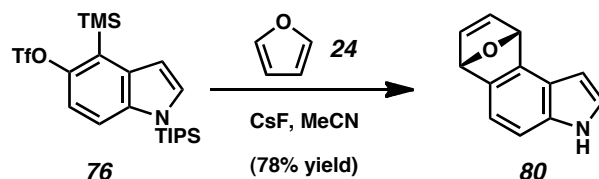

**Furan Diels–Alder adduct 80.** To a stirred solution of silyltriflate **76** (35.0 mg, 0.0708 mmol) and furan (**24**) (25.7  $\mu\text{L}$ , 0.354 mmol, 5 equiv) in MeCN (1.4 mL) was added CsF (32.3 mg, 0.212 mmol, 3.0 equiv). The solution was stirred at 23  $^{\circ}\text{C}$  for 3.5 h, then filtered over silica gel (EtOAc eluent). Evaporation under reduced pressure afforded the crude product, which was further purified by flash chromatography (3:1:1 Hexanes: $\text{CH}_2\text{Cl}_2$ : $\text{Et}_2\text{O}$ ) to provide adduct **80** (10.1 mg, 78% yield) as a white solid.  $R_f$  0.27 (3:1:1 Hexanes: $\text{CH}_2\text{Cl}_2$ : $\text{Et}_2\text{O}$ );  $^1\text{H}$  NMR (500 MHz,  $\text{CDCl}_3$ ):  $\delta$  8.11 (br s, 1H), 7.24 (dd,  $J = 3.0, 2.5$ , 1H), 7.21 (d,  $J = 8.0$ , 1H), 7.16 (app. qd,  $J = 5.5, 2.0$ , 2H), 7.02 (dd,  $J = 7.5, 0.5$ , 1H), 6.50–6.49 (m, 1H), 6.04–6.03 (m, 1H), 5.86–5.85 (m, 1H);  $^{13}\text{C}$  NMR (75 MHz,  $\text{CDCl}_3$ ):  $\delta$  145.1, 143.0, 142.0, 141.0, 135.0, 126.2, 123.1, 115.1, 106.2, 99.6, 83.2, 82.0; IR (film): 3293, 3011, 1430  $\text{cm}^{-1}$ ; HRMS-ESI ( $m/z$ ) [ $M + \text{Na}$ ] $^+$  calcd for  $\text{C}_{12}\text{H}_9\text{NONa}$ , 206.0582; found, 206.0583.

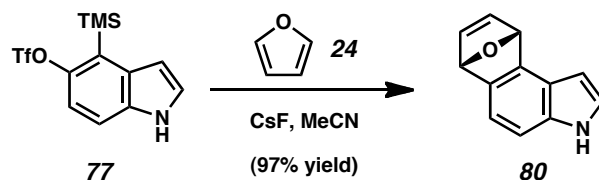

**Furan Diels–Alder adduct 80.** To a stirred solution of silyltriflate **77** (32.2 mg, 0.0954 mmol) and furan (**24**) (34.7  $\mu\text{L}$ , 0.477 mmol, 5 equiv) in MeCN (1.9 mL) was added CsF (29.0 mg, 0.1908 mmol, 2.0 equiv). The solution was stirred at 23  $^{\circ}\text{C}$  for 2 h, then filtered over silica gel (EtOAc eluent). Evaporation under reduced pressure afforded the crude product, which was further purified by flash chromatography (3:1:1 Hexanes: $\text{CH}_2\text{Cl}_2$ : $\text{Et}_2\text{O}$ ) to provide adduct **80** (16.9 mg, 97% yield) as a white solid. Spectral data match those reported above (S18).

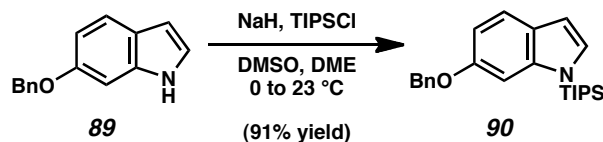

***N*-TIPS benzyloxyindole 90.** To a solution of 6-benzyloxyindole **89** (3.00 g, 13.4 mmol) in 1,2-dimethoxyethane (37.0 mL) and DMSO (4.1 mL) at 0 °C was added 95% NaH (0.97 g, 40.3 mmol, 3 equiv). The resulting solution was stirred at 0 °C for 30 min, then TIPSCl (5.73 mL, 26.8 mmol, 2 equiv) was added dropwise over 5 min. The resulting mixture was stirred at 0 °C for 10 min, and then the reaction was allowed to warm to 23 °C. After 24 h, the mixture was placed in a 0 °C bath and additional NaH (0.50 g, 20.8 mmol, 1.56 equiv), followed by TIPSCl (5.70 mL, 26.6 mmol, 1.99 equiv) were added. The reaction was allowed to warm to 23 °C and stirred for 18.5 h. The reaction was cooled to 0 °C and additional NaH (0.5 g, 20.8 mmol, 1.56 equiv) and TIPSCl (5.7 mL, 26.6 mmol, 1.99 equiv) were added. The reaction was allowed to warm to 23 °C. Following 23 h of stirring at 23 °C, the mixture was cooled to 0 °C and quenched with brine (60 mL). The biphasic mixture was further diluted with EtOAc (60 mL) and H<sub>2</sub>O (60 mL). The layers were separated, and then the aqueous layer was extracted with EtOAc (2 × 60 mL). The combined organic layers were washed with washed brine (60 mL), H<sub>2</sub>O (60 mL), then dried over MgSO<sub>4</sub>. Evaporation of the solvent under reduced pressure afforded crude **90**, which was further purified by flash chromatography (100% Hexanes → 3:1 Hexanes:CH<sub>2</sub>Cl<sub>2</sub>) to afford **90** (4.65 g, 91% yield). *R*<sub>f</sub> 0.74 (3:1 Hexanes:EtOAc); <sup>1</sup>H NMR (300 MHz, CDCl<sub>3</sub>): δ 7.50 (d, *J* = 8.5, 1H), 7.46 (d, *J* = 7.0, 2H), 7.38 (app. t, *J* = 8.0, 2H), 7.33–7.30 (m, 1H), 7.13 (d, *J* = 3.5, 1H), 7.00 (d, *J* = 2.0, 1H), 6.89 (dd, *J* = 8.5, 2.0, 1H), 6.54 (d, *J* = 3.5, 1H), 5.13 (s, 2H), 1.58 (septet, *J* = 7.5, 3H), 1.09 (d, *J* = 7.0, 18H); <sup>13</sup>C NMR (125 MHz, CDCl<sub>3</sub>): δ 155.1, 141.6, 138.0, 130.3, 128.7, 127.8, 127.3, 126.0, 120.8, 110.4, 104.5, 100.0, 71.1, 18.2, 12.9; IR (film): 2948, 2868, 1416, 1207 cm<sup>-1</sup>; HRMS-ESI (*m/z*) [M + Na]<sup>+</sup> calcd for C<sub>24</sub>H<sub>33</sub>NOSiNa, 402.2229; found, 402.2233.

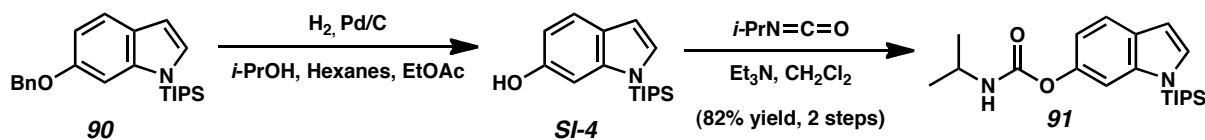

**N-TIPS carbamate 91.** To a solution of *N*-TIPS benzyloxyindole **90** (4.65 g, 12.2 mmol) in 1:1:1 *i*-PrOH:Hexanes:EtOAc (45 mL) was added 10% Pd/C (1.29 g, 1.22 mmol, 10 mol% Pd). The mixture was placed under an atmosphere of hydrogen (double-balloon), stirred for 25.5 h at 23 °C, at which point was added additional 10% Pd/C (2.07 g, 1.95 mmol, 15 mol% Pd). After stirring for another 48 h at 23 °C was added additional 10% Pd/C (1.16 g, 1.09 mmol, 9 mol% Pd). The reaction was stirred for 5 h at 23 °C, and then filtered over celite (EtOAc eluent). Evaporation of the solvent under reduced pressure afforded crude **SI-4** as a light brown oil, which was used in the subsequent step without further purification.  $R_f$  0.63 (3:1 Hexanes:EtOAc).

Carbamate **91** was prepared following the general procedure described by Igarashi.<sup>11</sup> Crude **SI-4** was dissolved in  $\text{CH}_2\text{Cl}_2$  (61.0 mL), and  $\text{Et}_3\text{N}$  (0.85 mL, 6.1 mmol, 0.5 equiv), followed by *i*-PrNCO (1.41 mL, 14.4 mmol, 2.0 equiv), was added. The solution was stirred at 23 °C for 4 h, and then additional *i*-PrNCO (1.41 mL, 14.4 mmol, 2.0 equiv) was added. The solution continued to be stirred for 11 h, and then additional *i*-PrNCO (0.70 mL, 7.1 mmol, 0.58 equiv) was added. After stirring at 23 °C for 3 h, the mixture was concentrated to dryness under reduced pressure. Purification by flash chromatography (9:1 Hexanes:EtOAc) provided *N*-TIPS carbamate **91** (3.74 g, 82% yield, 2 steps).  $R_f$  0.63 (2:1 Hexanes:Et<sub>2</sub>O); <sup>1</sup>H NMR (500 MHz,  $\text{CDCl}_3$ ):  $\delta$  7.56 (d,  $J = 8.5$ , 1H), 7.24 (d,  $J = 3.5$ , 1H), 6.91 (dd,  $J = 8.5, 2.5$ , 1H), 6.60 (dd,  $J = 3.0, 0.5$ , 1H), 4.82 (d,  $J = 6.0$ , 1H), 3.95–3.91 (m, 1H), 1.68 (septet,  $J = 7.5$ , 3H), 1.24 (d,  $J = 6.0$ , 6H), 1.15 (d,  $J = 7.5$ , 18H); <sup>13</sup>C NMR (125 MHz,  $\text{CDCl}_3$ ):  $\delta$  154.4, 146.6, 140.8, 131.8, 129.2, 120.6, 114.5, 107.0, 104.8, 43.5, 23.2, 18.4, 13.0; IR (film): 3324, 2950, 2867, 1735, 1470  $\text{cm}^{-1}$ ; HRMS-ESI ( $m/z$ ) [ $\text{M} + \text{Na}$ ]<sup>+</sup> calcd for  $\text{C}_{21}\text{H}_{34}\text{N}_2\text{O}_2\text{SiNa}$ , 397.2287; found, 397.2286.

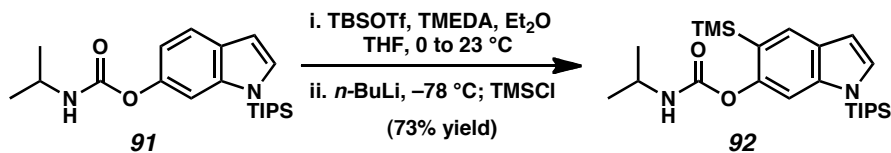

***N*-TIPS silyl carbamate 92.** *N*-TIPS silyl carbamate **92** was prepared following the general procedure described by Hoppe and Snieckus for *o*-lithiation of isopropyl carbamates, with minor modifications.<sup>6,7</sup> To a solution of *N*-TIPS carbamate **91** (0.659 g, 1.76 mmol) and TMEDA (0.394 mL, 2.47 mmol, 1.4 equiv) in 3:1 Et<sub>2</sub>O:THF (16.9 mL) at -78 °C was added a solution of TBSOTf in *n*-pentane (1.30 M, 1.61 mL, 2.11 mmol, 1.2 equiv). After stirring for 5 min, the white suspension was allowed to warm to 23 °C over 35 min. TMEDA (0.987 mL, 6.16 mmol, 3.5 equiv) was added, and the mixture was cooled to -78 °C. A solution of *n*-BuLi in hexanes (1.54 M, 4.00 mL, 6.16 mmol, 3.5 equiv) was added dropwise over 20 min. The mixture was stirred at -78 °C for 3 h, then neat TMSCl (1.56 mL, 12.3 mmol, 7 equiv) was added dropwise over 16 min. The resulting mixture was stirred at -78 °C for 1 h, quenched with 1 M NaHSO<sub>4</sub> (10 mL), and allowed to warm to 23 °C over 45 min with vigorous stirring. The organic layer was separated, washed successively with 1 M NaHSO<sub>4</sub> (10 mL) and brine (10 mL), then dried over MgSO<sub>4</sub>. Evaporation under reduced pressure afforded the crude product, which was purified by flash chromatography (10:1 Hexanes:Acetone) to afford *N*-TIPS silyl carbamate **92** (0.570 g, 73% yield). *R*<sub>f</sub> 0.67 (3:1 Hexanes:EtOAc); <sup>1</sup>H NMR (500 MHz, CDCl<sub>3</sub>): δ 7.69 (s, 1H), 7.25 (s, 1H), 7.23 (d, *J* = 3.5, 1H), 6.61 (dd, *J* = 3.0, 0.5, 1H), 4.70 (d, *J* = 8.0, 1H), 3.99–3.93 (m, 1H), 1.69 (septet, *J* = 7.5, 3H), 1.24 (d, *J* = 6.5, 6H), 1.15 (d, *J* = 8.0, 18H), 0.32 (s, 9H); <sup>13</sup>C NMR (125 MHz, CDCl<sub>3</sub>): δ 154.3, 151.1, 142.0, 131.8, 129.4, 126.7, 122.9, 107.9, 104.8, 43.5, 23.3, 18.3, 12.9, -0.3; IR (film): 3331, 2945, 2868, 1704 cm<sup>-1</sup>; HRMS-ESI (*m/z*) [*M* + Na]<sup>+</sup> calcd for C<sub>24</sub>H<sub>42</sub>N<sub>2</sub>O<sub>2</sub>Si<sub>2</sub>Na, 469.2682; found, 469.2677.

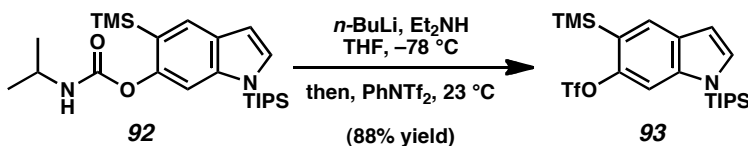

***N*-TIPS silyltriflate 93.** To a solution of *N*-TIPS silyl carbamate **92** (0.468 g, 1.05 mmol) in THF (10.5 mL) at -78 °C were added *n*-BuLi in hexanes (2.91 M, 0.432 mL, 1.26 mmol, 1.2 equiv)

and Et<sub>2</sub>NH (0.130 mL, 1.26 mmol, 1.2 equiv). The resulting mixture was stirred at –78 °C for 15 min, then allowed to warm to 23 °C over an additional 30 min. Next, PhNTf<sub>2</sub> (0.449 g, 1.26 mmol, 1.2 equiv) was added as a solid in a single portion. After stirring for 1 h, the reaction mixture was passed over a plug of silica gel (EtOAc eluent). Evaporation under reduced pressure afforded the crude product, which was further purified by flash chromatography (98:2 Hexanes:Benzene) to provide silyltriflate **93** (0.456 g, 88% yield) as a white solid. *R*<sub>f</sub> 0.79 (9:1 Hexanes:Et<sub>2</sub>O); <sup>1</sup>H NMR (500 MHz, CDCl<sub>3</sub>): δ 7.74 (s, 1H), 7.57 (s, 1H), 7.31 (d, *J* = 3.0, 1H), 6.65 (d, *J* = 3.0, 1H), 1.67 (septet, *J* = 2.5, 3H), 1.15 (d, *J* = 7.5, 18H), 0.40 (s, 9H); <sup>13</sup>C NMR (125 MHz, CDCl<sub>3</sub>): δ 151.2, 141.5, 133.4, 130.8, 127.7, 122.5, 118.8 (q, *J* = 318, CF<sub>3</sub>), 105.4, 105.0, 18.1, 12.8, –0.3; IR (film): 2955, 2866, 1417, 1138 cm<sup>–1</sup>; HRMS-ESI (*m/z*) [M + Na]<sup>+</sup> calcd for C<sub>21</sub>H<sub>34</sub>F<sub>3</sub>NO<sub>3</sub>SSi<sub>2</sub>Na, 516.1648; found, 516.1634.

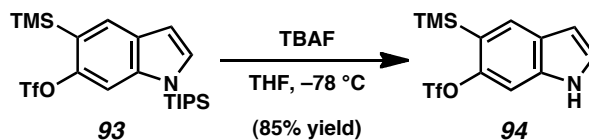

**N-H silyltriflate 94.** To a solution of *N*-TIPS silyltriflate **93** (0.440 g, 0.891 mmol) in THF (10 mL) at –78 °C was added a solution of TBAF in THF (1.0 M, 0.891 mL, 0.891 mmol, 1 equiv) dropwise. The solution was stirred for 10 min, diluted with Et<sub>2</sub>O (5 mL), then quenched with H<sub>2</sub>O (5 mL). The biphasic mixture was allowed to warm to 23 °C over 30 min. The layers were separated, and then the aqueous layer was extracted with Et<sub>2</sub>O (3 × 10 mL). The combined organic layers were washed with brine (10 mL), then dried over MgSO<sub>4</sub>. Evaporation under reduced pressure afforded the crude product, which was further purified by flash chromatography (3:1 Hexanes:Et<sub>2</sub>O) to provide *N*-H silyltriflate **94** (285 mg, 85% yield). *R*<sub>f</sub> 0.21 (4:1 Hexanes:Et<sub>2</sub>O); <sup>1</sup>H NMR (500 MHz, CDCl<sub>3</sub>): δ 8.28 (br s, 1H), 7.80 (s, 1H), 7.44 (s, 1H), 7.24 (dd, *J* = 3.1, 2.5, 1H), 6.59–6.58 (m, 1H), 0.44 (s, 9H); <sup>13</sup>C NMR (125 MHz, CDCl<sub>3</sub>): δ 151.0, 136.0, 128.0, 127.2, 126.2, 122.5, 118.5 (q, *J* = 318, CF<sub>3</sub>), 102.7, 102.4, –0.5; IR (film): 3447, 2958, 1208 cm<sup>–1</sup>; HRMS-ESI (*m/z*) [M + H]<sup>+</sup> calcd for C<sub>12</sub>H<sub>15</sub>F<sub>3</sub>NO<sub>3</sub>SSi, 338.0494; found, 338.0490.

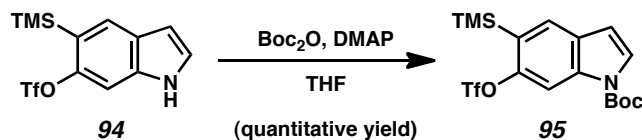

***N*-Boc silyltriflate 95.** *N*-Boc silyltriflate **95** was prepared following the general procedure described by Gribble for Boc-protection of indoles.<sup>12</sup> To a stirred solution of *N*-H silyltriflate **94** (0.200 g, 0.59 mmol) in THF (6 mL) were added  $\text{Boc}_2\text{O}$  (0.142 g, 0.65 mmol, 1 equiv) and then DMAP (7.2 mg, 0.059 mmol, 0.1 equiv). The resulting mixture was stirred at 23 °C for 14 h, then additional  $\text{Boc}_2\text{O}$  (70 mg, 0.32 mmol, 0.54 equiv) was added. After stirring at 23 °C for an additional 2 h, the reaction mixture was filtered over silica gel (EtOAc eluent). Evaporation under reduced pressure afforded *N*-Boc silyltriflate **95** (0.261 g, quantitative yield).  $R_f$  0.57 (9:1 Hexanes:Et<sub>2</sub>O); <sup>1</sup>H NMR (500 MHz, 40 °C, CDCl<sub>3</sub>): δ 8.20 (s, 1H), 7.692–7.687 (m, 2H), 6.58 (d,  $J = 3.7$ , 1H), 1.69 (s, 9H), 0.41 (s, 9H); <sup>13</sup>C NMR (125 MHz, 40 °C, CDCl<sub>3</sub>): δ 152.2, 149.1, 135.5, 129.6, 127.9, 127.7, 125.9, 118.5 (q,  $J = 318$ , CF<sub>3</sub>), 106.9, 106.7, 84.7, 28.0, –0.8; IR (film): 2983, 1740, 1140 cm<sup>-1</sup>; HRMS-ESI ( $m/z$ ) [ $M + \text{Na}$ ]<sup>+</sup> calcd for C<sub>17</sub>H<sub>22</sub>F<sub>3</sub>NO<sub>5</sub>SSiNa, 460.0838; found, 460.0842.

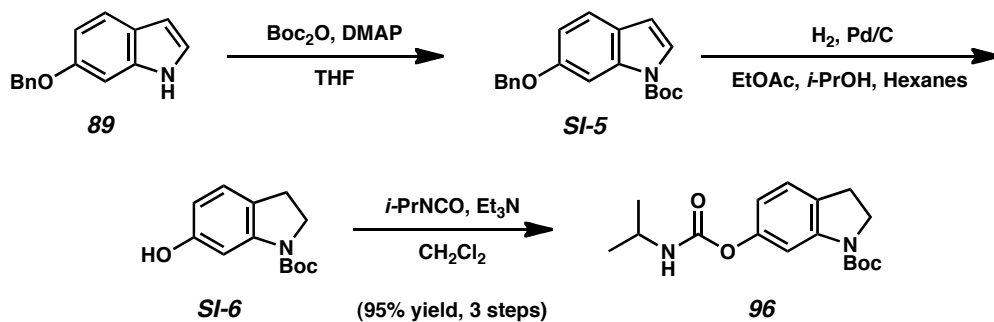

***N*-Boc carbamate 96.** *N*-Boc benzyloxyindole **SI-5** was prepared following the general procedure described by Gribble for Boc-protection of indoles.<sup>12</sup> To a stirred solution of benzyloxyindole **89** (5.00 g, 22.4 mmol) in THF (223 mL) were added  $\text{Boc}_2\text{O}$  (5.38 g, 24.6 mmol, 1.1 equiv) and DMAP (0.274 g, 2.24 mmol, 0.1 equiv). The resulting mixture was stirred at 23 °C for 2 h, then filtered over silica gel (EtOAc eluent). Evaporation under reduced pressure

afforded crude **SI-5**, which was used in the subsequent step without further purification.  $R_f$  0.49 (9:1 Hexanes:Et<sub>2</sub>O); <sup>1</sup>H NMR (500 MHz, 40 °C, CDCl<sub>3</sub>): δ 7.86 (s, 1H), 7.48–7.46 (m, 3H), 7.42 (d,  $J$  = 8.5, 1H), 7.39 (app. t,  $J$  = 7.7, 2H), 7.32 (app. t,  $J$  = 7.4, 1H), 6.95 (dd,  $J$  = 8.5, 2.3, 1H), 6.49 (d,  $J$  = 3.7, 1H), 5.15 (s, 2H), 1.67 (s, 9H); <sup>13</sup>C NMR (125 MHz, 40 °C, CDCl<sub>3</sub>): δ 156.9, 149.7, 137.2, 136.1, 128.3, 127.7, 127.4, 124.6, 124.5, 121.1, 112.7, 106.9, 100.8, 83.3, 70.5, 28.1; IR (film): 2979, 2917, 1729, 1343, 1151 cm<sup>-1</sup>; HRMS-ESI ( $m/z$ ) [M + Na]<sup>+</sup> calcd for C<sub>20</sub>H<sub>21</sub>NO<sub>3</sub>Na, 346.1419; found, 346.1422.

Crude **SI-5** was dissolved in 1:1:1 *i*-PrOH:Hexanes:EtOAc (120 mL), then 10% Pd/C (2.38 g, 2.24 mmol, 10 mol% Pd) was added. The mixture was placed under an atmosphere of hydrogen (double-balloon), stirred for 14 h at 23 °C, and then filtered over celite (EtOAc eluent, 250 mL). Evaporation of the solvent under reduced pressure afforded crude **SI-6** as a light brown oil, which was used in the subsequent step without further purification.  $R_f$  0.35 (4:1 Hexanes:EtOAc). <sup>1</sup>H NMR (500 MHz, 40 °C, CDCl<sub>3</sub>): δ 7.36 (br s, 1H), 6.95 (d,  $J$  = 8.0, 1H), 6.43 (d,  $J$  = 8.0, 1H), 5.47 (br s, 1H), 3.97 (dd,  $J$  = 8.5, 8.3, 2H), 2.99 (dd,  $J$  = 8.7, 8.4, 2H), 1.56 (s, 9H); <sup>13</sup>C NMR (125 MHz, 40 °C, CDCl<sub>3</sub>): δ 155.5, 152.6, 143.6, 124.9, 122.8, 108.9, 102.9, 80.9, 48.4, 28.2, 26.4; IR (film): 3329, 2989, 1657 cm<sup>-1</sup>; HRMS-ESI ( $m/z$ ) [M + Na]<sup>+</sup> calcd for C<sub>13</sub>H<sub>17</sub>NO<sub>3</sub>Na, 258.1106; found, 258.1110.

Carbamate **96** was prepared following the general procedure described by Igarashi et al.<sup>11</sup> To a solution of crude **SI-6** in CH<sub>2</sub>Cl<sub>2</sub> (224 mL) was added subsequently *i*-PrNCO (3.30 mL, 33.6 mmol, 1.5 equiv) and Et<sub>3</sub>N (0.936 mL, 6.72 mmol, 0.3 equiv). The solution was stirred at 23 °C for 18 h, then concentrated to dryness under reduced pressure. Purification by flash chromatography (7:3 Hexanes:EtOAc) provided *N*-Boc carbamate **96** (6.83 g, 95% yield over 3 steps).  $R_f$  0.25 (3:2 Hexanes:Et<sub>2</sub>O); <sup>1</sup>H NMR (500 MHz, 40 °C, CDCl<sub>3</sub>): δ 7.54 (br s, 1H), 7.05 (d,  $J$  = 7.9, 1H), 6.68 (d,  $J$  = 7.8, 1H), 4.79 (br s, 1H), 3.98 (app. t,  $J$  = 8.3, 2H), 3.88 (d,  $J$  = 5.9, 1H), 3.03 (app. t,  $J$  = 8.6, 2H), 1.55 (s, 9H), 1.22 (d,  $J$  = 5.4, 6H); <sup>13</sup>C NMR (125 MHz, 40 °C, CDCl<sub>3</sub>): δ 153.8, 152.2, 150.6, 143.4, 127.8, 124.4, 115.1, 108.9, 80.8, 48.2, 43.3, 28.3, 26.7, 22.8; IR (film): 3348, 2977, 1732, 1681 cm<sup>-1</sup>; HRMS-ESI ( $m/z$ ) [M + Na]<sup>+</sup> calcd for C<sub>17</sub>H<sub>24</sub>N<sub>2</sub>O<sub>4</sub>Na, 343.1634; found, 343.1632.



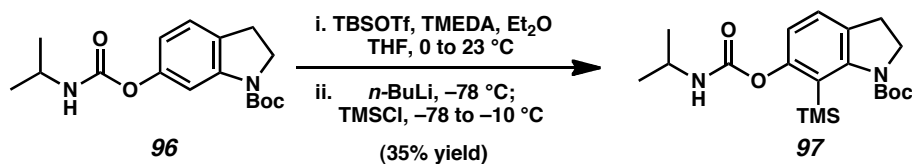

***N*-Boc silylcarbamate indoline 97.** *N*-Boc silylcarbamate **97** was prepared following the general procedure described by Hoppe and Snieckus for *o*-lithiation of isopropyl carbamates, with modifications.<sup>6,7</sup> To a solution of *N*-Boc carbamate **96** (3.70 g, 11.5 mmol) and TMEDA (1.32 mL, 16.2 mmol, 1.4 equiv) in 3:1 Et<sub>2</sub>O:THF (116 mL) at 0 °C was added a solution of TBSOTf in *n*-pentane (1.30 M, 10.7 mL, 13.9 mmol, 1.2 equiv). After stirring for 5 min, the mixture was allowed to warm to 23 °C over 30 min. TMEDA (3.12 mL, 38.1 mmol, 3.3 equiv) was added, and the mixture was cooled to -78 °C. A solution of *n*-BuLi in hexanes (1.60 M, 23.8 mL, 38.1 mmol, 3.3 equiv) was added dropwise over 45 min. The mixture was stirred at -78 °C for 4 h, then neat TMSCl (10.3 mL, 80.8 mmol, 7 equiv) was added. The resulting mixture was stirred at -78 °C for 1 h, then stirred at -10 °C for 14 h. The reaction mixture was cooled to -78 °C, then quenched with 1 M NaHSO<sub>4</sub> (90 mL) and allowed to warm to 23 °C over 1 h with vigorous stirring. The organic layer was separated, washed successively with 1 M NaHSO<sub>4</sub> (50 mL) and brine (50 mL), then dried over MgSO<sub>4</sub>. Evaporation under reduced pressure afforded the crude product, which was purified by flash chromatography (85:15 Hexanes:Acetone) to afford *N*-Boc silylcarbamate **97** (1.58 g, 35% yield). *R*<sub>f</sub> 0.29 (4:1 Hexanes:EtOAc); <sup>1</sup>H NMR (500 MHz, 40 °C, CDCl<sub>3</sub>): δ 7.13 (d, *J* = 7.9, 1H), 6.83 (d, *J* = 7.9, 1H), 4.72 (br s, 1H), 4.05 (t, *J* = 7.7, 2H), 3.93 (br s, 1H), 2.91 (t, *J* = 7.7, 2H), 1.52 (s, 9H), 1.24 (d, *J* = 6.5, 6H), 0.30 (s, 9H); <sup>13</sup>C NMR (125 MHz, 40 °C, CDCl<sub>3</sub>): δ 155.1, 155.0, 153.7, 148.8, 129.8, 124.8, 122.5, 118.0, 80.4, 50.1, 43.2, 28.7, 28.3, 22.8, 0.3; IR (film): 3343, 2976, 2245, 1722, 1683 cm<sup>-1</sup>; HRMS-ESI (*m/z*) [M + Na]<sup>+</sup> calcd for C<sub>20</sub>H<sub>32</sub>N<sub>2</sub>O<sub>4</sub>SiNa, 415.2029; found, 415.2028.

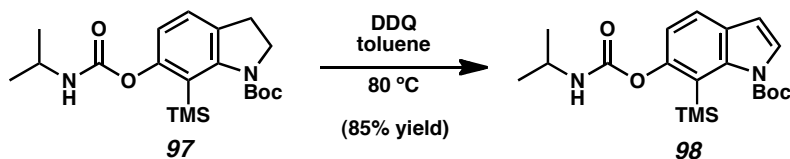

***N*-Boc silyltriflate indole 98.** To a stirred solution of *N*-Boc silyltriflate indoline **97** (1.11 g, 2.83 mmol) in toluene (28 mL) was added DDQ (0.770 g, 3.39 mmol, 1.2 equiv). The reaction vessel was placed in an oil bath maintained at 80 °C for 2.5 h. After cooling to 23 °C, the reaction mixture was filtered over neutral Brockman Grade I 58 Å activated alumina (packed with Hexanes; EtOAc eluent). Evaporation under reduced pressure afforded the crude product, which was further purified by flash chromatography (7:3 Hexanes:Et<sub>2</sub>O) to provide **98** (0.933 g, 85% yield) as a white solid. *R*<sub>f</sub> 0.56 (7:3 Hexanes:Et<sub>2</sub>O); <sup>1</sup>H NMR (500 MHz, CDCl<sub>3</sub>): δ 7.49 (d, *J* = 8.3, 1H), 7.43 (d, *J* = 3.8, 1H), 7.05 (d, *J* = 8.4, 1H), 6.51 (d, *J* = 3.7, 1H), 4.83 (d, *J* = 7.9, 1H), 3.98–3.91 (m, 1H), 1.60 (s, 9H), 1.25 (d, *J* = 6.5, 6H), 0.36 (s, 9H); <sup>13</sup>C NMR (125 MHz, CDCl<sub>3</sub>): δ 154.1, 154.0, 150.5, 140.8, 128.11, 128.08, 121.9, 119.7, 118.2, 107.8, 83.1, 43.2, 28.1, 22.9, 1.4; IR (film): 2978, 2250, 1737, 1153 cm<sup>-1</sup>; HRMS-ESI (*m/z*) [M + Na]<sup>+</sup> calcd for C<sub>20</sub>H<sub>30</sub>N<sub>2</sub>O<sub>4</sub>SiNa, 413.1873; found, 413.1873.

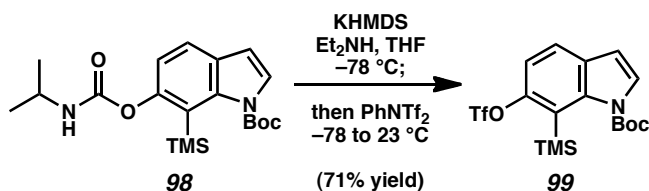

***N*-Boc silyltriflate 99.** To a solution of *N*-Boc silylcarbamate **98** (1.05 g, 2.69 mmol) in THF (27 mL) at –78 °C was added Et<sub>2</sub>NH (0.334 mL, 3.23 mmol, 1.2 equiv), followed by a solution of KHMDS in toluene (0.5 M, 6.45 mL, 3.23 mmol, 1.2 equiv) dropwise over 10 min. The reaction was stirred at –78 °C for 20 min, then additional KHMDS in toluene (0.5 M, 1.61 mL, 0.805 mmol, 0.30 equiv), followed by Et<sub>2</sub>NH (83 μL, 0.805 mmol, 0.30 equiv), was added. After stirring for 20 min at –78 °C, a solution of PhNTf<sub>2</sub> (1.44 g, 4.03 mmol, 1.5 equiv) in THF (8 mL) was added. After stirring for 1 h, the reaction mixture was allowed to warm to 23 °C. The reaction stirred for an additional 14 h at 23 °C, then was passed over a plug of silica gel (EtOAc eluent). Evaporation under reduced pressure afforded the crude product, which was further

purified by flash chromatography (85:15 Hexanes:CH<sub>2</sub>Cl<sub>2</sub>) to provide *N*-Boc silyltriflate **99** (0.830 g, 71% yield). *R*<sub>f</sub> 0.46 (9:1 Hexanes:EtOAc); <sup>1</sup>H NMR (500 MHz, CDCl<sub>3</sub>): δ 7.57–7.54 (m, 2H), 7.17 (d, *J* = 8.5, 1H), 6.56 (d, *J* = 3.8, 1H), 1.62 (s, 9H), 0.43 (s, 9H); <sup>13</sup>C NMR (125 MHz, CDCl<sub>3</sub>): δ 152.5, 149.9, 140.7, 130.0, 129.6, 122.7, 122.4, 118.5 (q, *J* = 318, CF<sub>3</sub>), 116.3, 107.4, 84.0, 28.0, 1.5; IR (film): 2985, 1737, 1199 cm<sup>-1</sup>; HRMS-ESI (*m/z*) [M + Na]<sup>+</sup> calcd for C<sub>17</sub>H<sub>22</sub>F<sub>3</sub>NO<sub>5</sub>SSiNa, 460.0838; found, 460.0838.

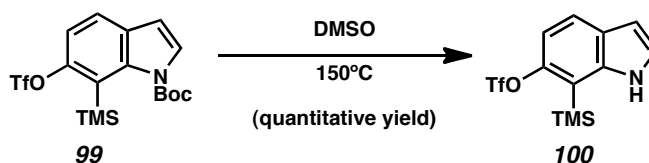

***N*-H silyltriflate 100.** A solution of *N*-Boc silyltriflate **99** (0.234 g, 0.53 mmol) in DMSO (5.3 mL) was stirred at 150 °C for 1 h. After cooling to 23 °C, the reaction mixture was poured into a 1:1 solution of Et<sub>2</sub>O:H<sub>2</sub>O (15 mL). The layers were separated and the aqueous layer was further diluted with H<sub>2</sub>O (10 mL). The aqueous layer was extracted with Et<sub>2</sub>O, followed by EtOAc (2 × 20 mL). The combined organic layers were washed successively with H<sub>2</sub>O (20 mL) and brine (20 mL), then dried over MgSO<sub>4</sub>. Evaporation under reduced pressure afforded the crude product, which was purified by flash chromatography (9:1 Hexanes: Et<sub>2</sub>O) to afford *N*-H silyltriflate **100** (0.180 g, quantitative yield). *R*<sub>f</sub> 0.29 (6:1 Hexanes:EtOAc); <sup>1</sup>H NMR (500 MHz, CDCl<sub>3</sub>): δ 8.52 (br s, 1H), 7.70 (d, *J* = 8.7, 1H), 7.31 (app. t, *J* = 2.9, 1H), 7.17 (d, *J* = 8.7, 1H), 6.61 (dd, *J* = 3.2, 2.0, 1H), 0.59 (s, 9H); <sup>13</sup>C NMR (125 MHz, CDCl<sub>3</sub>): δ 151.1, 139.5, 126.3, 126.0, 123.0, 118.6 (q, *J* = 318, CF<sub>3</sub>), 113.1, 112.4, 102.5, 0.7; IR (film): 3489, 2957, 1410, 1208 cm<sup>-1</sup>; HRMS-ESI (*m/z*) [M + Na]<sup>+</sup> calcd for C<sub>12</sub>H<sub>14</sub>F<sub>3</sub>NO<sub>3</sub>SSiNa, 360.0313; found, 360.0312.

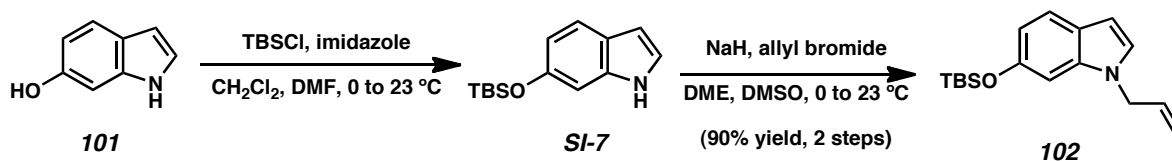

***N*-Allyl silylether 102.** To a solution of hydroxyindole **101** (1.60 g, 12.0 mmol) in  $\text{CH}_2\text{Cl}_2$  (120 mL) and DMF (12 mL) at 0 °C was added imidazole (2.05 g, 30.1 mmol, 2.5 equiv) and TBSCl (2.18 g, 14.4 mmol, 1.2 equiv). After stirring for 10 min at 0 °C, the mixture was warmed to 23 °C and allowed to stir for an additional 80 min. The reaction mixture was quenched with  $\text{H}_2\text{O}$  (80 mL), and stirred for 1 min. The layers were separated and the aqueous layer was extracted with  $\text{CH}_2\text{Cl}_2$  (3  $\times$  30 mL). The combined organic layers were washed with brine (20 mL), then dried over  $\text{Na}_2\text{SO}_4$ . Evaporation under reduced pressure afforded the crude product, which was purified by flash chromatography (9:1 Hexanes:EtOAc) to afford *N*-H silylether **SI-7** as a white solid, which was used directly in the subsequent step.  $R_f$  0.29 (6:1 Hexanes:EtOAc); **SI-7**:  $^1\text{H}$  NMR (500 MHz,  $\text{CDCl}_3$ ):  $\delta$  7.93 (br s, 1H), 7.53 (d,  $J = 8.5$ , 1H), 7.06 (dd,  $J = 3.1$ , 2.4, 1H), 6.873–6.870 (m, 1H), 6.79 (dd,  $J = 8.5$ , 2.1, 1H), 6.53–6.52 (m, 1H), 1.10 (s, 9H), 0.29 (s, 6H);  $^{13}\text{C}$  NMR (125 MHz,  $\text{CDCl}_3$ ):  $\delta$  151.6, 136.5, 123.3, 122.7, 120.8, 114.4, 102.3, 101.7, 25.8, 18.2, –4.4; IR (film): 3400, 2955, 2929, 2887, 2858, 1621, 1252  $\text{cm}^{-1}$ ; HRMS-ESI ( $m/z$ ) [ $\text{M} + \text{H}$ ] $^+$  calcd for  $\text{C}_{14}\text{H}_{22}\text{NOSi}$ , 248.1471; found, 248.1474.

To a solution of *N*-H silyl ether **SI-7** in 1,2-dimethoxyethane (120 mL) and DMSO (12 mL) at 0 °C was added 60% NaH (1.36 g, 34.0 mmol, 2.8 equiv). The resulting solution was stirred at 0 °C for 20 min, then allyl bromide (1.5 mL, 17.0 mmol, 1.4 equiv) was added dropwise over 5 min. The mixture was stirred at 0 °C for 10 min, warmed to 23 °C over 90 min, then quenched with  $\text{H}_2\text{O}$  (30 mL). The biphasic mixture was stirred for an additional 10 min. The layers were separated, and then the aqueous layer was extracted with  $\text{Et}_2\text{O}$  (3  $\times$  50 mL). The combined organic layers were washed with  $\text{H}_2\text{O}$  (30 mL), washed with brine (30 mL), then dried over  $\text{Na}_2\text{SO}_4$ . Evaporation of the solvent under reduced pressure afforded the crude product, which was purified by flash chromatography (97:3 Hexanes:  $\text{Et}_2\text{O}$ ) to provide *N*-allyl silyl ether **102** (3.10 g, 90% yield over 2 steps) as a colorless oil.  $R_f$  0.64 (3:1 Hexanes:EtOAc);  $^1\text{H}$  NMR (500 MHz,  $\text{CDCl}_3$ ):  $\delta$  7.48 (d,  $J = 8.5$ , 1H), 7.01 (d,  $J = 3.1$ , 1H), 6.79 (d,  $J = 1.8$ , 1H), 6.72 (dd,  $J = 8.5$ , 2.1, 1H), 6.46 (d,  $J = 3.1$ , 1H), 6.04–5.97 (m, 1H), 5.22 (dd,  $J = 10.2$ , 1.3, 1H), 5.11 (dd,

17.06, 1.4, 1H), 4.66 (dd,  $J = 3.8, 1.2, 2\text{H}$ ), 1.05 (s, 9H), 0.24 (s, 6H);  $^{13}\text{C}$  NMR (125 MHz,  $\text{CDCl}_3$ ):  $\delta$  151.4, 136.8, 133.3, 126.9, 123.4, 121.0, 117.1, 113.9, 101.1, 100.4, 48.8, 25.8, 18.2, -4.4; IR (film): 2955, 2930, 2858, 1620, 1486, 1263  $\text{cm}^{-1}$ ; HRMS-ESI ( $m/z$ ) [ $\text{M} + \text{H}$ ] $^+$  calcd for  $\text{C}_{17}\text{H}_{26}\text{NOSi}$ , 288.1784; found, 288.1776.

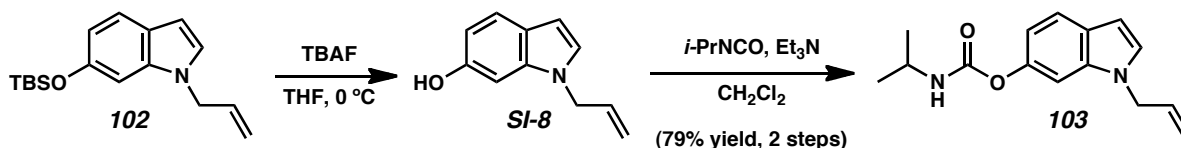

***N*-Allyl carbamate 103.** To a solution of *N*-allyl silyl ether **102** (4.06 g, 14.12 mmol) in THF (150 mL) at 0 °C was added a solution of TBAF in THF (1.0 M, 15.5 mL, 15.5 mmol, 1.1 equiv). The solution was stirred for 1 h, then quenched with  $\text{H}_2\text{O}$  (100 mL) and diluted with  $\text{Et}_2\text{O}$  (50 mL) allowed to warm to 23 °C over 60 min. The layers were separated, and then the aqueous layer was extracted with  $\text{Et}_2\text{O}$  (3  $\times$  100 mL). The combined organic layers were washed with brine (50 mL), then dried over  $\text{MgSO}_4$ . Evaporation under reduced pressure afforded crude product **SI-8**, which was further purified by flash chromatography (4:1 Hexanes: $\text{EtOAc}$ ) and then used in the subsequent reaction.  $R_f$  0.10 (9:1 Hexanes: $\text{Et}_2\text{O}$ );  $^1\text{H}$  NMR (500 MHz,  $\text{CDCl}_3$ ):  $\delta$  7.46 (d,  $J = 8.4, 1\text{H}$ ), 6.98 (d,  $J = 3.2, 1\text{H}$ ), 6.76 (d,  $J = 2.2, 1\text{H}$ ), 6.67 (dd,  $J = 8.4, 2.2, 1\text{H}$ ), 6.44 (dd,  $J = 3.2, 0.7, 1\text{H}$ ), 6.01–5.93 (m, 1H), 5.21 (dq,  $J = 10, 1.5, 1\text{H}$ ), 5.08 (dq,  $J = 17.5, 1.5, 1\text{H}$ ), 4.64–4.63 (m, 3H);  $^{13}\text{C}$  NMR (125 MHz,  $\text{CDCl}_3$ ):  $\delta$  151.4, 136.9, 133.2, 126.9, 123.1, 121.4, 117.1, 109.3, 101.3, 95.4, 48.7; IR (film): 3338, 2919, 1624, 1180  $\text{cm}^{-1}$ ; HRMS-ESI ( $m/z$ ) [ $\text{M} + \text{H}$ ] $^+$  calcd for  $\text{C}_{11}\text{H}_{12}\text{NO}$ , 174.0919; found, 174.0916.

Crude **SI-8** was dissolved in  $\text{CH}_2\text{Cl}_2$  (150 mL) and *i*-PrNCO (2.08 mL, 21.18 mmol, 1.5 equiv), followed by  $\text{Et}_3\text{N}$  (0.590 mL, 4.24 mmol, 0.3 equiv), was added. The solution was stirred at 23 °C for 16 h, then concentrated to dryness under reduced pressure. Purification by flash chromatography (99:1 DCM: $\text{Et}_2\text{O}$ ) provided *N*-allyl carbamate **103** (2.89 g, 79% yield over 2 steps) as a white solid.  $R_f$  0.29 (4:1 Hexanes: $\text{EtOAc}$ );  $^1\text{H}$  NMR (500 MHz,  $\text{CDCl}_3$ ):  $\delta$  7.56 (d,  $J = 8.5, 1\text{H}$ ), 7.12 (d,  $J = 1.3, 1\text{H}$ ), 7.08 (d,  $J = 3.1, 1\text{H}$ ), 6.88 (dd,  $J = 8.5, 1.8, 1\text{H}$ ), 6.49 (d,  $J = 3.0, 1\text{H}$ ), 6.02–5.94 (m, 1H), 5.21 (d,  $J = 10.2, 1\text{H}$ ), 5.10 (d,  $J = 17.1, 1\text{H}$ ), 4.87 (br s, 1H), 4.68 (d,  $J$

= 4.5, 2H), 3.95–3.90 (m, 1H), 1.24 (d,  $J = 6.3$ , 6H);  $^{13}\text{C}$  NMR (125 MHz,  $\text{CDCl}_3$ ):  $\delta$  154.3, 146.5, 136.0, 133.1, 128.2, 126.1, 121.0, 117.3, 114.0, 102.7, 101.4, 48.8, 43.3, 22.9; IR (film): 3302, 2975, 1736, 1702, 1239  $\text{cm}^{-1}$ ; HRMS-ESI ( $m/z$ )  $[\text{M} + \text{Na}]^+$  calcd for  $\text{C}_{15}\text{H}_{18}\text{N}_2\text{O}_2\text{Na}$ , 281.1266; found, 281.1260.

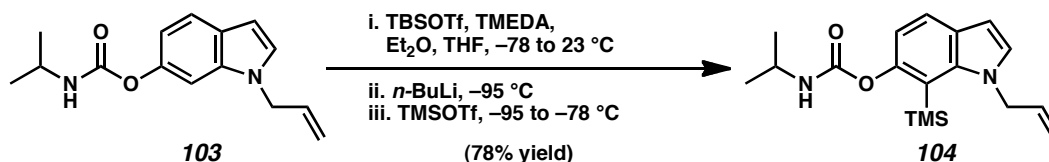

***N*-Allyl silylcarbamate 104.** *N*-allyl silylcarbamate **104** was prepared following the general procedure described by Hoppe and Snieckus for *o*-lithiation of isopropyl carbamates, with modifications.<sup>6,7</sup> To a solution of *N*-allyl carbamate **103** (1.45 g, 5.61 mmol) in 3:1 Et<sub>2</sub>O:THF (60 mL) at -78 °C was added TMEDA (1.15 mL, 14.0 mmol, 2.5 equiv), followed by a solution of TBSOTf in *n*-pentane (1.30 M, 8.64 mL, 11.22 mmol, 2.0 equiv) dropwise over 10 minutes. The resulting mixture was stirred at -78 °C for 5 minutes and allowed to warm to 23 °C over 30 min, by which time TMEDA·TfOH had formed as an oil on the bottom of the flask. TMEDA (1.89 mL, 22.45 mmol, 4 equiv) was added, and the mixture was cooled to -95 °C. A solution of *n*-BuLi in hexanes (1.43 M, 15.7 mL, 22.45 mmol, 4 equiv) was added dropwise over 60 min. The mixture was stirred at -95 °C for 4 h, then neat TMSOTf (7.11 mL, 39.29 mmol, 7.0 equiv) was added dropwise over 30 min. The resulting mixture was stirred at -95 °C for 5 min, stirred at -78 °C for 2 h, then quenched with 1 M aqueous NaHSO<sub>4</sub> (50 mL), and allowed to warm to 23 °C over 1 hour with vigorous stirring. The biphasic mixture was further diluted with Et<sub>2</sub>O (50 mL). The organic layer was separated, washed successively with 1 M aqueous NaHSO<sub>4</sub> (50 mL) and brine (40 mL), then dried over MgSO<sub>4</sub>. Evaporation under reduced pressure afforded the crude product, which was purified by flash chromatography (9:1 Hexanes:EtOAc) to afford *N*-allyl silylcarbamate **104** (1.45 g, 78% yield).  $R_f$  0.53 (4:1 Hexanes:EtOAc);  $^1\text{H}$  NMR (500 MHz,  $\text{CDCl}_3$ ):  $\delta$  7.58 (d,  $J = 8.4$ , 1H), 7.07 (d,  $J = 3.2$ , 1H), 6.83 (d,  $J = 8.4$ , 1H), 6.55 (d,  $J = 3.3$ , 1H), 5.88–5.81 (m, 1H), 5.14 (d,  $J = 10.2$ , 1H), 4.96 (d,  $J = 17.1$ , 1H), 4.79 (d,  $J = 5.2$ , 3H), 3.97–3.91 (m, 1H), 1.24 (d,  $J = 6.5$ , 6H), 0.46 (s, 9H);  $^{13}\text{C}$  NMR (125 MHz,  $\text{CDCl}_3$ ):  $\delta$  154.5, 152.5, 141.9, 134.2, 130.1, 127.0, 123.0, 117.3, 115.2, 113.3, 103.6, 52.1, 43.3, 22.9, 2.4; IR (film): 3325,

2972, 1706, 1513, 1200, 1168  $\text{cm}^{-1}$ ; HRMS-ESI ( $m/z$ )  $[\text{M} + \text{Na}]^+$  calcd for  $\text{C}_{18}\text{H}_{26}\text{N}_2\text{O}_2\text{SiNa}$ , 353.1661; found, 353.1659.

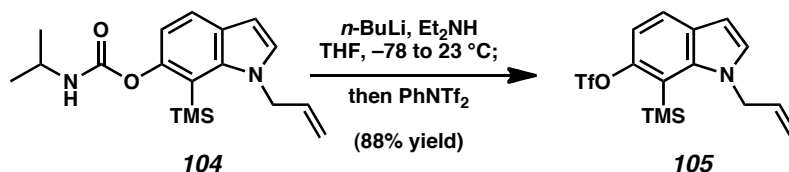

***N*-Allyl silyltriflate 105.** To a solution of *N*-allyl silylcarbamate **104** (1.08 g, 3.26 mmol) in THF (40 mL) at  $-78 \text{ }^\circ\text{C}$  were added dropwise over 10 min *n*-BuLi in hexanes (1.59 M, 2.4 mL, 3.84 mmol, 1.2 equiv), and then  $\text{Et}_2\text{NH}$  (405  $\mu\text{L}$ , 3.91 mmol, 1.2 equiv). The resulting mixture was stirred at  $-78 \text{ }^\circ\text{C}$  for 25 min, then allowed to warm to  $23 \text{ }^\circ\text{C}$  over an additional 30 min. Next,  $\text{PhNTf}_2$  (1.42 g, 3.90 mmol, 1.2 equiv) was added as a solid in a single portion. After stirring for 1 h, the reaction mixture was passed over a plug of silica gel (EtOAc eluent). Evaporation under reduced pressure afforded the crude product, which was further purified by flash chromatography (9:1 Hexanes:  $\text{Et}_2\text{O}$ ) to provide *N*-allyl silyltriflate **105** (1.00 g, 88% yield).  $R_f$  0.65 (4:1 Hexanes:EtOAc);  $^1\text{H}$  NMR (500 MHz,  $\text{CDCl}_3$ ):  $\delta$  7.63 (d,  $J = 8.5$ , 1H), 7.18 (d,  $J = 3.2$ , 1H), 7.02 (d,  $J = 8.5$ , 1H), 6.60 (d,  $J = 3.2$ , 1H), 5.86–5.78 (m, 1H), 5.14 (dd,  $J = 10.8$ , 0.5, 1H), 4.93 (dd,  $J = 17.1$ , 0.5, 1H), 4.82 (d,  $J = 5.4$ , 2H), 0.54 (s, 9H);  $^{13}\text{C}$  NMR (125 MHz,  $\text{CDCl}_3$ ):  $\delta$  151.0, 142.0, 133.3, 131.9, 128.7, 123.5, 118.6 (q,  $J = 319$ ,  $\text{CF}_3$ ), 117.8, 115.5, 113.6, 103.7, 52.3, 2.0; IR (film): 2959, 1408, 1210  $\text{cm}^{-1}$ ; HRMS-ESI ( $m/z$ )  $[\text{M} + \text{H}]^+$  calcd for  $\text{C}_{16}\text{H}_{18}\text{F}_3\text{NO}_3\text{SSi}$ , 378.0807; found, 378.0800.

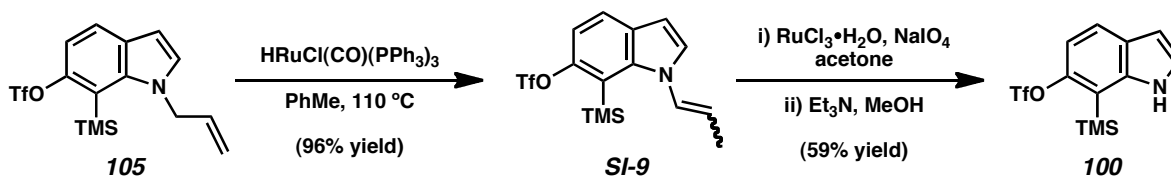

***N*-H silyltriflate 100.** To a solution of *N*-allyl silyltriflate **105** (0.210 g, 0.56 mmol) in toluene (5.5 mL) was added  $\text{HRuCl(CO)(PPh}_3)_3$  (26.6 mg, 27.9  $\mu\text{mol}$ , 0.05 equiv). The flask was topped with a reflux condenser and left open to the air. The flask was placed in a preheated oil bath

maintained at 120 °C. After 55 min, the flask was removed from the oil bath. After cooling to 23 °C, the reaction mixture was filtered over silica gel (EtOAc eluent). Evaporation under reduced pressure afforded the crude product, which was further purified by flash chromatography (9:1 Hexane:Benzenes) to provide the isomerized product **SI-9** (202.2 mg, 96% yield) as a mixture of isomers (E:Z = 3:1), which was used in the next step without further purification.  $R_f = 0.59$  (9:1 Hexane:EtOAc).

To a solution of **SI-9** (31.3 mg, 0.083 mmol) in acetone (1.6 mL, filtered over activated, neutral alumina prior to use) were added a 0.035 M aqueous solution of  $\text{RuCl}_3 \cdot \text{H}_2\text{O}$  (85  $\mu\text{L}$ , 2.9  $\mu\text{mol}$ , 0.035 equiv) and  $\text{NaIO}_4$  (73.6 mg, 0.344 mmol, 4.1 equiv, added as 4 equal portions over 5 min). The reaction was stirred for 4 h and then  $\text{Et}_2\text{O}$  (1 mL) was added. After stirring for 1 min, the reaction was further diluted with a solution of saturated aqueous  $\text{Na}_2\text{S}_2\text{O}_3$  (1 mL) and stirred for 10 min. The layers were separated, and the aqueous layer was extracted with  $\text{Et}_2\text{O}$  (3 x 2 mL). The combined organic layers were washed with  $\text{H}_2\text{O}$  (2 mL), and then concentrated under reduced pressure. The crude reaction mixture was redissolved in MeOH (1.5 mL), and  $\text{Et}_3\text{N}$  (2.5  $\mu\text{L}$ , 18  $\mu\text{mol}$ , 0.2 equiv) was added. After stirring for 30 min, the reaction was concentrated under reduced pressure to afford crude **100**, which was further purified by flash chromatography (9:1 Hexane:EtOAc) to provide *N*-H silyltriflate **100** (16.4 mg, 59% yield from **SI-9**, 68% based on recovered **SI-9**). Spectral data of **100** match those reported above (**SX**).



### **E. Regioselectivity in nucleophilic additions to indolynes**

Supporting information for the products of the reactions of the *N*-Me- 4,5-, 5,6-, and 6,7-indolyne precursors with various nucleophiles has previously been reported in an earlier publication from our laboratory.<sup>1,3</sup>

**F. Influence of *N*-substituents on the Regioselectivity of indolyne reactions.**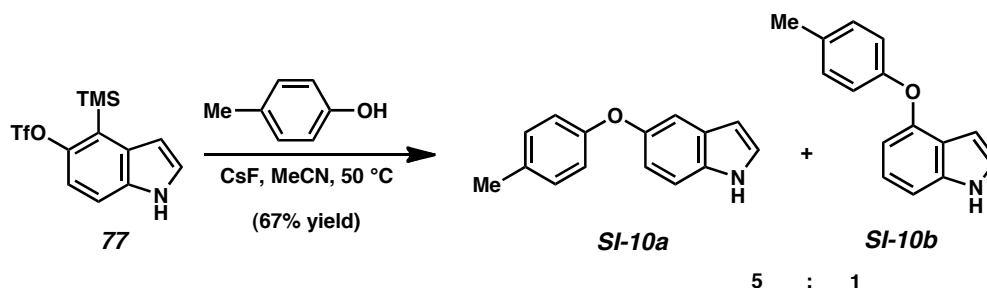

***N*-H Ethers SI-10a and SI-10b.** To a stirred solution of *N*-H silyltriflate **77** (40 mg, 0.12 mmol) and *p*-cresol (64 mg, 0.59 mmol, 5 equiv) in MeCN (1.6 mL) was added CsF (54 mg, 0.360 mmol, 3 equiv). The reaction vessel was placed in an aluminum heating block maintained at 50 °C for 14 h. After cooling to 23 °C, the reaction mixture was filtered over silica gel (EtOAc eluent). Evaporation under reduced pressure afforded the crude products, which were further purified by flash chromatography (65:35 Hexanes:CH<sub>2</sub>Cl<sub>2</sub>) to provide a mixture of *N*-H ethers **SI-10a** and **SI-10b** (5:1 ratio of **SI-10a**:**SI-10b**, 17.6 mg, 67% yield). An analytical sample of **SI-10a** was obtained by preparative TLC (1:1 Hexanes:CH<sub>2</sub>Cl<sub>2</sub>). **SI-10a**: *R*<sub>f</sub> 0.31 (1:1 Hexanes:CH<sub>2</sub>Cl<sub>2</sub>); <sup>1</sup>H NMR (500 MHz, CDCl<sub>3</sub>): δ 8.15 (br s, 1H), 7.36 (d, *J* = 8.7, 1H), 7.27–7.26 (m, 1H), 7.24 (app. t, *J* = 2.8, 1H), 7.09 (d, *J* = 8.3, 2H), 6.95 (dd, *J* = 8.7, 2.3, 1H), 6.90–6.87 (m, 2H), 6.50–6.49 (m, 1H), 2.31 (s, 3H); <sup>13</sup>C NMR (125 MHz, CDCl<sub>3</sub>): δ 156.8, 150.6, 132.5, 131.4, 129.9, 128.4, 125.2, 117.5, 115.4, 111.7, 110.6, 102.6, 20.5; IR (film): 3420, 3030, 2921, 1504 cm<sup>-1</sup>; HRMS-ESI (*m/z*) [M + Na]<sup>+</sup> calcd for C<sub>15</sub>H<sub>13</sub>NONa, 246.0895; found, 246.0892. **SI-10b**: *R*<sub>f</sub> 0.34 (1:1 Hexanes:CH<sub>2</sub>Cl<sub>2</sub>).

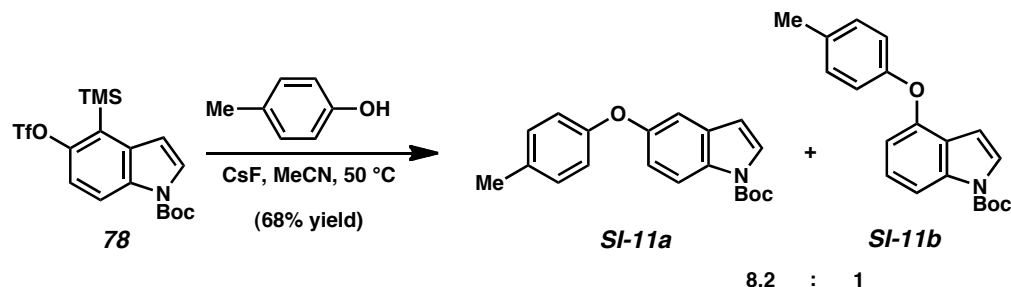

***N*-Boc Ethers SI-11a and SI-11b.** To a stirred solution of *N*-H silyltriflate **78** (20 mg, 0.046 mmol) and *p*-cresol (7.4 mg, 0.068 mmol, 1.5 equiv) in MeCN (1 mL) was added CsF (21 mg, 0.14 mmol, 3 equiv). The reaction vessel was placed in an aluminum heating block maintained at 50 °C for 14 h. After cooling to 23 °C, the reaction mixture was filtered over silica gel (EtOAc eluent). Evaporation under reduced pressure afforded the crude products, which were further purified by preparative TLC (1:1 Hexanes:CH<sub>2</sub>Cl<sub>2</sub>) to provide a mixture of *N*-Boc ethers **SI-11a** and **SI-11b** (8.2:1 ratio of **SI-11a**:**SI-11b**, 9.6 mg, 68% yield). An analytical sample of **SI-11a** was obtained by flash chromatography (85:15 Hexanes:CH<sub>2</sub>Cl<sub>2</sub> → 4:1 Hexanes:CH<sub>2</sub>Cl<sub>2</sub>). **SI-11a**: *R*<sub>f</sub> 0.57 (9:1 Hexanes:Et<sub>2</sub>O); <sup>1</sup>H NMR (500 MHz, 40 °C, CDCl<sub>3</sub>): δ 8.09 (d, *J* = 8.9, 1H), 7.59 (d, *J* = 3.7, 1H), 7.15 (d, *J* = 2.4, 1H), 7.11 (d, *J* = 8.3, 2H), 7.02 (dd, *J* = 8.9, 2.4, 1H), 6.92–6.89 (m, 2H), 6.48 (d, *J* = 3.6, 1H), 2.33 (s, 3H), 1.68 (s, 9H); <sup>13</sup>C NMR (125 MHz, 40 °C, CDCl<sub>3</sub>, 15/16 C): δ 156.0, 153.1, 149.5, 132.0, 131.4, 129.9, 126.7, 118.1, 116.3, 115.9, 110.4, 106.9, 83.5, 28.1, 20.4; IR (film): 2979, 1734, 1464 cm<sup>-1</sup>; HRMS-ESI (*m/z*) [M + Na]<sup>+</sup> calcd for C<sub>20</sub>H<sub>21</sub>NO<sub>3</sub>Na, 346.1419; found, 346.1417. **SI-11b**: *R*<sub>f</sub> 0.57 (9:1 Hexanes:Et<sub>2</sub>O).

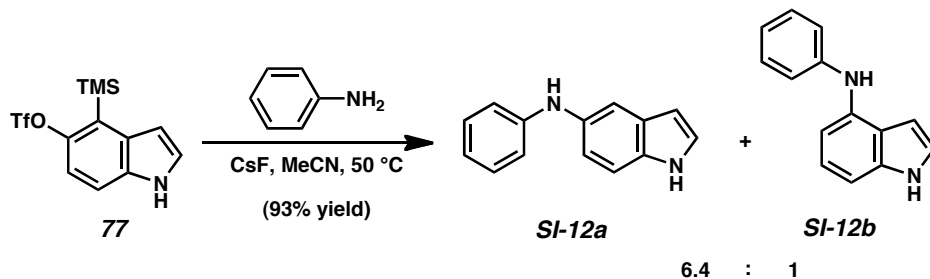

***N*-H Amines SI-12a and SI-12b.** To a stirred solution of *N*-H silyltriflate **77** (20 mg, 0.059 mmol) and aniline (27 μL, 0.30 mmol, 5 equiv) in MeCN (1 mL) was added CsF (27 mg, 0.18 mmol, 3 equiv). The reaction vessel was placed in an aluminum heating block maintained at 50

°C for 14 h. After cooling to 23 °C, the reaction mixture was filtered over silica gel (EtOAc eluent). Evaporation under reduced pressure afforded the crude products, which were further purified by flash chromatography (3:7 Hexanes:CH<sub>2</sub>Cl<sub>2</sub>) to provide a mixture of *N*-H amines **SI-12a** and **SI-12b** (6.4:1 ratio of **SI-12a:SI-12b**, 11.4 mg, 93% yield). An analytical sample of **SI-12a** was obtained by preparative TLC (100% CH<sub>2</sub>Cl<sub>2</sub>). **SI-12a**: *R<sub>f</sub>* 0.40 (100% CH<sub>2</sub>Cl<sub>2</sub>); <sup>1</sup>H NMR (500 MHz, 40 °C, CDCl<sub>3</sub>): δ 8.09 (br s, 1H), 7.44 (d, *J* = 1.9, 1H), 7.34 (d, *J* = 8.6, 1H), 7.23–7.20 (m, 3H), 7.04 (dd, *J* = 8.6, 2.1, 1H), 6.95 (d, *J* = 7.7, 2H), 6.82 (app. t, *J* = 7.3, 1H), 6.50–6.49 (m, 1H), 5.64 (br s, 1H); <sup>13</sup>C NMR (125 MHz, CDCl<sub>3</sub>): δ 146.1, 135.1, 132.6, 129.1, 128.5, 124.8, 118.9, 118.2, 115.2, 113.0, 111.5, 102.3; IR (film): 3403, 3043, 2918, 2850, 1712, 1598, 1496, 1307 cm<sup>-1</sup>; HRMS-ESI (*m/z*) [*M* + *H*]<sup>+</sup> calcd for C<sub>14</sub>H<sub>13</sub>N<sub>2</sub>, 209.1079; found, 209.1080. **SI-12b**: *R<sub>f</sub>* 0.49 (100% CH<sub>2</sub>Cl<sub>2</sub>).

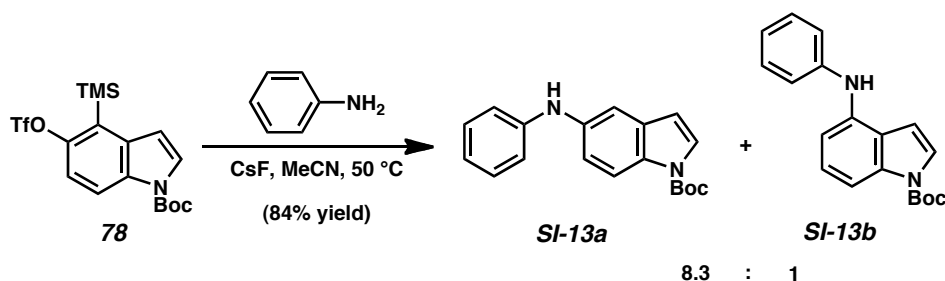

***N*-Boc Amines SI-13a and SI-13b.** To a stirred solution of *N*-Boc silyltriflate **78** (25 mg, 0.057 mmol) and aniline (26 μL, 0.29 mmol, 5 equiv) in MeCN (1 mL) was added CsF (26 mg, 0.17 mmol, 3 equiv). The reaction vessel was placed in an aluminum heating block maintained at 50 °C for 14 h. After cooling to 23 °C, the reaction mixture was filtered over silica gel (EtOAc eluent). Evaporation under reduced pressure afforded the crude products, which were further purified by flash chromatography (9:1 Hexanes:Et<sub>2</sub>O) to provide a mixture of *N*-Boc amines **SI-13a** and **SI-13b** (8.3:1 ratio of **SI-13a:SI-13b**, 14.7 mg, 84% yield). An analytical sample of **SI-13a** was obtained by preparative TLC (7:3 Hexanes:Et<sub>2</sub>O). **SI-13a**: *R<sub>f</sub>* 0.58 (3:1 Hexanes:Et<sub>2</sub>O); <sup>1</sup>H NMR (500 MHz, CDCl<sub>3</sub>): δ 8.05 (br s, 1H), 7.58 (s, 1H), 7.31 (d, *J* = 2.0, 1H), 7.26–7.23 (m, 2H), 7.08 (dd, *J* = 9.0, 2.0, 1H), 7.02–7.01 (m, 2H), 6.88 (app. t, *J* = 7.5, 1H), 6.48 (d, *J* = 3.5, 1H), 5.68 (br s, 1H), 1.68 (s, 9H); <sup>13</sup>C NMR (125 MHz, CDCl<sub>3</sub>): δ 149.6, 144.7, 137.9, 131.4, 130.9, 129.2, 126.4, 119.9, 117.9, 116.2, 115.7, 111.2, 106.9, 83.4, 28.1; IR (film): 3393, 2979,

2936, 1730, 1371, 1126  $\text{cm}^{-1}$ ; HRMS-ESI ( $m/z$ )  $[\text{M} + \text{H}]^+$  calcd for  $\text{C}_{19}\text{H}_{21}\text{N}_2\text{O}_2$ , 309.1603; found, 309.1596. **SI-13b**:  $R_f$  0.58 (3:1 Hexanes:Et<sub>2</sub>O).

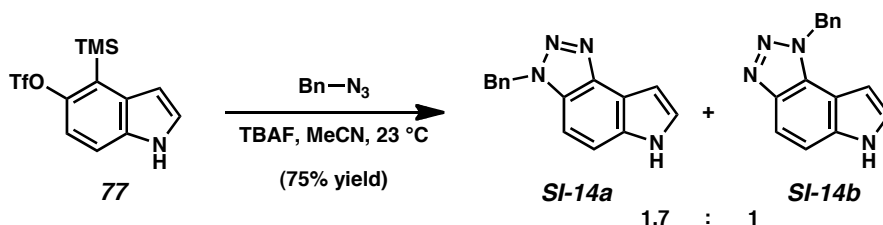

***N*-H triazoles **SI-14a** and **SI-14b**.** To a stirred solution of *N*-H silyltriflate **77** (20 mg, 0.059 mmol) and benzyl azide<sup>13</sup> (39 mg, 0.30 mmol, 5 equiv) in MeCN (1 mL) at 23 °C was added a solution of TBAF in THF (1.0 M, 120  $\mu\text{L}$ , 0.120 mmol, 2 equiv). The solution was stirred for 10 min, then filtered over silica gel (EtOAc eluent). Evaporation under reduced pressure afforded the crude products, which were further purified by flash chromatography (3:2 Hexanes:EtOAc  $\rightarrow$  1:1 Hexanes:EtOAc) to provide a mixture of *N*-H triazoles **SI-14a** and **SI-14b** (1.7:1 ratio of **SI-14a**:**SI-14b**, 11 mg, 75% yield). These compounds were characterized as a mixture.  $R_f$  0.34 (1:1 Hexanes:EtOAc); **SI-14a**:  $^1\text{H}$  NMR (500 MHz, DMSO):  $\delta$  11.65 (s, 1H), 7.56 (d,  $J = 8.5$ , 1H), 7.453–7.445 (m, 1H), 7.39–7.37 (m, 1H), 7.31–7.20 (m, 5H), 6.85 (s, 1H), 5.93 (s, 2H); **SI-14b**:  $^1\text{H}$  NMR (500 MHz, DMSO):  $\delta$  11.76 (s, 1H), 7.61 (d,  $J = 9.0$ , 1H), 7.453–7.445 (m, 1H), 7.39–7.37 (m, 1H), 7.31–7.20 (m, 5H), 6.81 (s, 1H), 6.07 (s, 2H);  $^{13}\text{C}$  NMR (125 MHz,  $\text{CDCl}_3$ ):  $\delta$  142.1, 140.4, 135.5, 135.1, 134.2, 132.1, 129.0, 128.82, 128.79, 128.1, 128.0, 127.8, 127.3, 126.9, 124.1, 123.2, 117.3, 113.5, 113.4, 110.5, 109.9, 103.4, 101.4, 100.8, 52.6, 52.3; IR (film): 3194, 3079, 2920, 1221  $\text{cm}^{-1}$ ; HRMS-ESI ( $m/z$ )  $[\text{M} + \text{Na}]^+$  calcd for  $\text{C}_{15}\text{H}_{12}\text{N}_4\text{Na}$ , 271.0960; found, 271.0965.

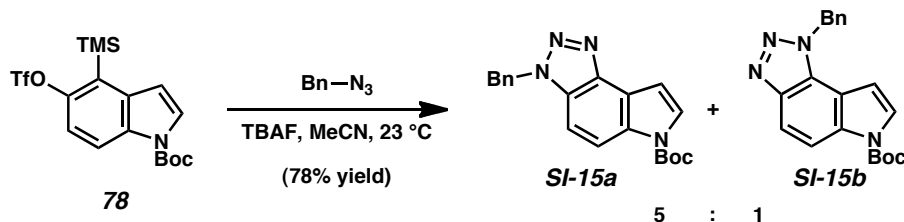

***N*-Boc triazoles SI-15a and SI-15b.** To a stirred solution of *N*-Boc silyltriflate **78** (20 mg, 0.046 mmol) and benzyl azide<sup>13</sup> (30 mg, 0.23 mmol, 5 equiv) in MeCN (1 mL) at 23 °C was added a solution of TBAF in THF (1.0 M, 90  $\mu$ L, 0.090 mmol, 2 equiv). The solution was stirred for 10 min, then filtered over silica gel (EtOAc eluent). Evaporation under reduced pressure afforded the crude products, which were further purified by flash chromatography (7:3 Hexanes:Et<sub>2</sub>O) to provide a mixture of *N*-Boc triazoles **SI-15a** and **SI-15b** (5:1 ratio of **SI-15a**:**SI-15b**, 12.4 mg, 78% yield). These compounds were characterized as a mixture. *R<sub>f</sub>* 0.17 (3:2 Hexanes:Et<sub>2</sub>O); **SI-15a**: <sup>1</sup>H NMR (500 MHz, 40 °C, CDCl<sub>3</sub>):  $\delta$  8.36 (d, *J* = 9.0, 1H), 7.74 (d, *J* = 3.5, 1H), 7.33–7.26 (m, 5H), 7.21–7.20 (m, 2H), 5.89 (s, 2H), 1.68 (s, 9H); **SI-15b**: <sup>1</sup>H NMR (500 MHz, 40 °C, CDCl<sub>3</sub>):  $\delta$  8.29 (d, *J* = 9.5, 1H), 7.94 (d, *J* = 9.5, 1H), 7.62 (d, *J* = 3.5, 1H), 7.33–7.26 (m, 5H), 6.58 (d, *J* = 3.5, 1H), 6.04 (s, 2H), 1.68 (s, 9H); <sup>13</sup>C NMR (125 MHz, CDCl<sub>3</sub>):  $\delta$  149.7, 149.5, 143.5, 140.2, 135.5, 135.1, 134.1, 132.0, 130.2, 129.2, 129.1, 128.5, 128.4, 127.6, 127.2, 126.9, 126.7, 126.0, 120.8, 116.6, 115.6, 113.6, 113.1, 105.4, 105.1, 104.1, 84.9, 84.5, 53.0, 52.6, 28.28, 28.25; IR (film): 2981, 1734, 1126 cm<sup>-1</sup>; HRMS-ESI (*m/z*) [*M* + *H*]<sup>+</sup> calcd for C<sub>20</sub>H<sub>21</sub>N<sub>4</sub>O<sub>2</sub>, 349.1664; found, 349.1666.

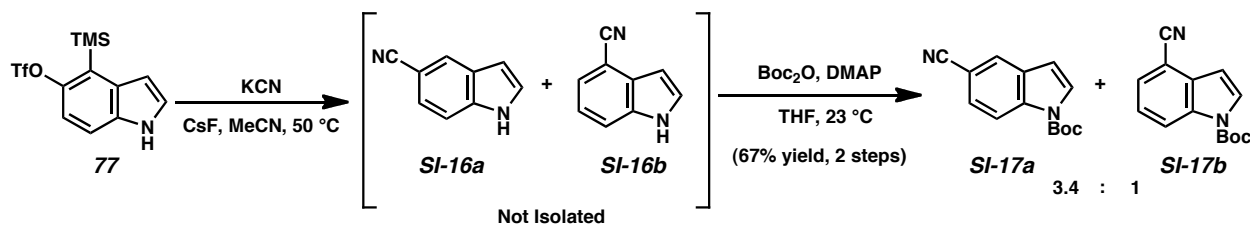

***N*-H cyanoindoles SI-16a and SI-16b.** To a stirred solution of *N*-H silyltriflate **77** (20 mg, 0.059 mmol) and potassium cyanide (5.8 mg, 0.089 mmol, 1.5 equiv) in MeCN (1 mL) was added CsF (27 mg, 0.18 mmol, 3 equiv). The reaction vessel was placed in an aluminum heating block maintained at 50 °C for 14 h. After cooling to 23 °C, the reaction mixture was filtered over silica

gel (EtOAc eluent). Evaporation under reduced pressure afforded a mixture of crude *N*-H cyanoindoles **SI-16a** and **SI-16b**. This crude mixture was dissolved in THF (1 mL) and treated with DMAP (1 mg, 0.0082 mmol, 0.14 equiv). The mixture was allowed to stir at 23 °C for 5 min, then Boc<sub>2</sub>O (13 mg, 0.059 mmol, 1 equiv) was added. The resulting mixture was stirred at 23 °C for an additional 14 h, then filtered over silica gel (EtOAc eluent). Evaporation under reduced pressure afforded the crude products, which were further purified by flash chromatography (95:5 Hexanes:Et<sub>2</sub>O) and then preparative TLC (4:1 Hexanes:Et<sub>2</sub>O) to provide *N*-Boc cyanoindoles **SI-17a** and **SI-17b** (5.7 mg and 1.7 mg, respectively; 3.4:1 ratio of **SI-17a:SI-17b**, 67% combined yield). Spectral data of **SI-17a** and **SI-17b** match those reported below (S39).

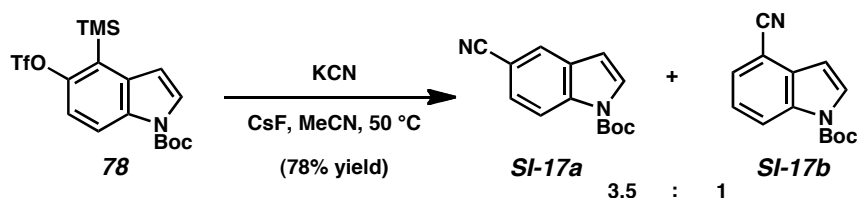

***N*-Boc cyanoindoles SI-17a and SI-17b.** To a stirred solution of *N*-Boc silyltriflate **78** (20 mg, 0.046 mmol) and potassium cyanide (4.5 mg, 0.069 mmol, 1.5 equiv) in MeCN (1 mL) was added CsF (21 mg, 0.14 mmol, 3 equiv). The reaction vessel was placed in an aluminum heating block maintained at 50 °C for 14 h. After cooling to 23 °C, the reaction mixture was filtered over silica gel (EtOAc eluent). Evaporation under reduced pressure afforded the crude products, which were further purified by preparative TLC (4:1 Hexanes:Et<sub>2</sub>O) to provide *N*-Boc cyanoindoles **SI-17a** and **SI-17b** (6.7 mg and 1.9 mg, respectively; 3.5:1 ratio of **SI-17a:SI-17b**, 78% combined yield). **SI-17a**: *R*<sub>f</sub> 0.30 (9:1 Hexanes:Et<sub>2</sub>O); <sup>1</sup>H NMR (500 MHz, 40 °C, CDCl<sub>3</sub>): δ 8.25 (d, *J* = 8.3, 1H), 7.90 (d, *J* = 1.0, 1H), 7.70 (d, *J* = 3.6, 1H), 7.56 (dd, *J* = 8.6, 1.5, 1H), 6.63 (d, *J* = 3.7, 1H), 1.68 (s, 9H); <sup>13</sup>C NMR (125 MHz, 40 °C, CDCl<sub>3</sub>): δ 148.9, 137.0, 130.4, 128.0, 127.2, 125.7, 119.7, 115.9, 106.8, 106.0, 84.8, 28.0; IR (film): 2930, 2226, 1741, 1365 cm<sup>-1</sup>; HRMS-ESI (*m/z*) [M + Na]<sup>+</sup> calcd for C<sub>14</sub>H<sub>14</sub>N<sub>2</sub>O<sub>2</sub>Na, 265.0953; found, 265.0956. **SI-17b**: *R*<sub>f</sub> 0.34 (9:1 Hexanes:Et<sub>2</sub>O); <sup>1</sup>H NMR (500 MHz, 40 °C, CDCl<sub>3</sub>): δ 8.40 (d, *J* = 8.4, 1H), 7.74 (d, *J* = 3.7, 1H), 7.54 (d, *J* = 7.5, 1H), 7.35 (app. t, *J* = 8.1, 1H), 6.78 (d, *J* = 3.7, 1H), 1.69 (s, 9H);

$^{13}\text{C}$  NMR (125 MHz, 40 °C,  $\text{CDCl}_3$ ):  $\delta$  148.9, 135.1, 132.2, 128.3, 127.0, 123.9, 119.6, 117.5, 105.3, 103.8, 84.7, 28.0; IR (film): 2980, 2225, 1726, 1120  $\text{cm}^{-1}$ ; HRMS-ESI ( $m/z$ )  $[\text{M} + \text{Na}]^+$  calcd for  $\text{C}_{14}\text{H}_{14}\text{N}_2\text{O}_2\text{Na}$ , 265.0953; found, 265.0948.

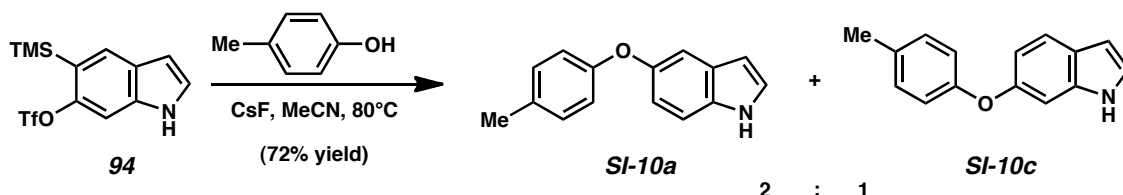

***N*-H ethers SI-10a and SI-10c.** To a stirred solution of *N*-H silyltriflate **94** (20 mg, 0.059 mmol) and *p*-cresol (32 mg, 0.30 mmol, 5 equiv) in MeCN (1 mL) was added CsF (27 mg, 0.18 mmol, 3 equiv). The reaction vessel was placed in an aluminum heating block maintained at 80 °C for 14 h. After cooling to 23 °C, the reaction mixture was filtered over silica gel (EtOAc eluent). Evaporation under reduced pressure afforded the crude products, which were further purified by flash chromatography (7:3 Hexanes:CH<sub>2</sub>Cl<sub>2</sub>) to provide a mixture of *N*-H ethers **SI-10a** and **SI-10c** (2:1 ratio of **SI-10a**:**SI-10c**, 8.9 mg, 72% yield). Spectral data of **SI-10a** and **SI-10c** match those reported above (S34) and below (S45), respectively.

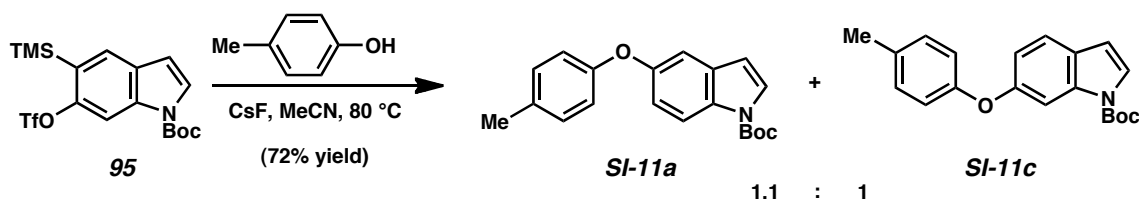

***N*-Boc ethers SI-11a and SI-11c.** To a stirred solution of *N*-Boc silyltriflate **95** (20 mg, 0.046 mmol) and *p*-cresol (7.4 mg, 0.069 mmol, 1.5 equiv) in MeCN (1 mL) was added CsF (21 mg, 0.14 mmol, 3 equiv). The reaction vessel was placed in an aluminum heating block maintained 80 °C for 14 h. After cooling to 23 °C, the reaction mixture was filtered over silica gel (EtOAc eluent). Evaporation under reduced pressure afforded the crude products, which were further purified by flash chromatography (3:1 Hexanes:CH<sub>2</sub>Cl<sub>2</sub>) to provide a mixture of *N*-Boc ethers **SI-**



**11a** and **SI-11c** (1.1:1 ratio of **SI-11a**:**SI-11c**, 10.7 mg, 71% yield). Spectral data of **SI-11a** and **SI-11c** match those reported above (S35) and below (S46), respectively.

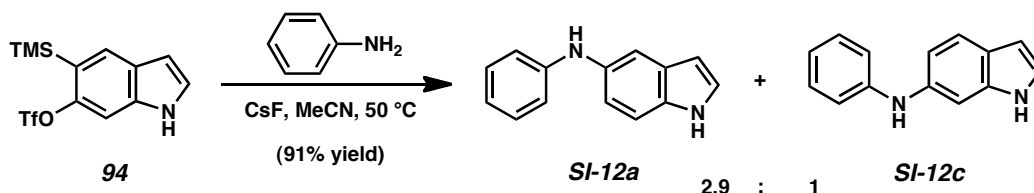

**N-H amines SI-12a and SI-12c.** To a stirred solution of *N*-H silyltriflate **94** (21.4 mg, 0.0634 mmol) and aniline (24.9  $\mu$ L, 0.317 mmol, 5 equiv) in MeCN (1.26 mL) was added CsF (28.9 mg, 0.190 mmol, 3 equiv). The reaction vessel was placed in an aluminum heating block maintained at 80 °C for 14 h. After cooling to 23 °C, the reaction mixture was filtered over silica gel (EtOAc eluent). Evaporation under reduced pressure afforded the crude products, which were further purified by flash chromatography (100% Benzene) to provide a mixture of *N*-H amines **SI-12a** and **SI-12c** (2.9:1 ratio of **SI-12a**:**SI-12c**, 12.0 mg, 91% yield). Spectral data of **SI-12a** and **SI-12c** match those reported above (S36) and below (S46), respectively.

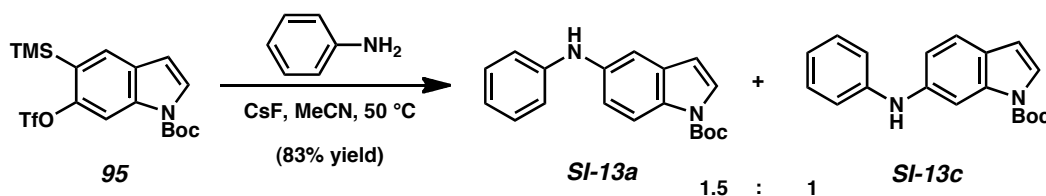

**N-Boc amines SI-13a and SI-13c.** To a stirred solution of *N*-Boc silyltriflate **95** (25.7 mg, 0.0587 mmol) and aniline (26.8  $\mu$ L, 0.294 mmol, 5 equiv) in MeCN (1.17 mL) was added CsF (17.8 mg, 0.117 mmol, 2 equiv). The reaction vessel was placed in an aluminum heating block maintained at 50 °C for 15.5 h. After cooling to 23 °C, the reaction mixture was filtered over silica gel (EtOAc eluent). Evaporation under reduced pressure afforded the crude products, which were further purified by flash chromatography (1.5:1 Benzene:Hexanes) to provide a mixture of *N*-Boc amines **SI-13a** and **SI-13c** (1.5:1 ratio of **SI-13a**:**SI-13c**, 15.1 mg, 83% yield).

Spectral data of **SI-13a** and **SI-13c** match those reported above (S36) and below (S47), respectively.

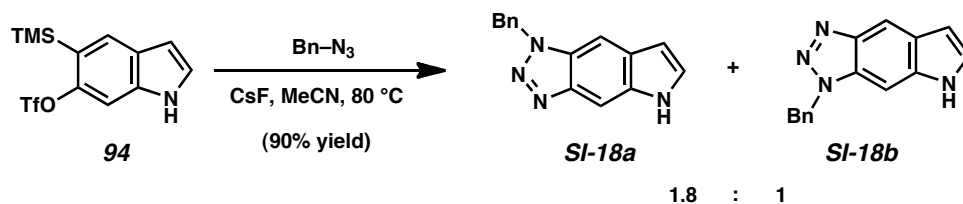

**N-H triazoles SI-18a and SI-18b.** To a stirred solution of *N*-H silyltriflate **94** (20 mg, 0.059 mmol) and benzyl azide<sup>13</sup> (39 mg, 0.30 mmol, 5 equiv) in MeCN (1 mL) was added CsF (27 mg, 0.18 mmol, 3 equiv). The reaction vessel was placed in an aluminum heating block maintained at 80 °C for 14 h. After cooling to 23 °C, the reaction mixture was filtered over silica gel (EtOAc eluent). Evaporation under reduced pressure afforded the crude products, which were further purified by flash chromatography (7:3 Hexanes:EtOAc → 1:1 Hexanes:EtOAc) to provide a mixture of *N*-H triazoles **SI-18a** and **SI-18b** (1.8:1 ratio of **SI-18a:SI-18b**, 13.2 mg, 90% yield). Analytical samples of **SI-18a** and **SI-18b** were obtained by preparative TLC (4:1 Hexanes:Acetone). **SI-18a:**  $R_f$  0.25 (1:1 Hexanes:EtOAc);  $^1\text{H}$  NMR (500 MHz,  $\text{CDCl}_3$ ):  $\delta$  8.65 (br s, 1H), 8.01 (s, 1H), 7.47 (s, 1H), 7.42 (app. t,  $J = 2.9$ , 1H), 7.33–7.25 (m, 5H), 6.55 (s, 1H), 5.89 (s, 2H);  $^{13}\text{C}$  NMR (125 MHz,  $\text{CDCl}_3$ ):  $\delta$  144.1, 135.6, 135.2, 131.0, 129.7, 129.3, 128.8, 128.1, 127.4, 101.5, 98.6, 97.6, 52.1. IR (film): 3182, 2919, 1447, 1242  $\text{cm}^{-1}$ ; HRMS-ESI ( $m/z$ ) [ $\text{M} + \text{H}$ ]<sup>+</sup> calcd for  $\text{C}_{15}\text{H}_{13}\text{N}_4$ , 249.1140; found, 249.1141. **SI-18b:**  $R_f$  0.33 (1:1 Hexanes:EtOAc);  $^1\text{H}$  NMR (500 MHz,  $\text{CDCl}_3$ ):  $\delta$  8.27 (s, 1H), 8.10 (br s, 1H), 7.32–7.25 (m, 6H), 7.15 (s, 1H), 6.67 (s, 1H), 5.86 (s, 2H);  $^{13}\text{C}$  NMR (125 MHz,  $\text{CDCl}_3$ ):  $\delta$  143.1, 137.6, 135.1, 130.6, 128.8, 128.3, 128.1, 127.6, 127.3, 109.6, 102.8, 88.0, 52.0; IR (film): 3204, 2918, 1250  $\text{cm}^{-1}$ ; HRMS-ESI ( $m/z$ ) [ $\text{M} + \text{Na}$ ]<sup>+</sup> calcd for  $\text{C}_{15}\text{H}_{12}\text{N}_4\text{Na}$ , 271.0960; found, 271.0956.

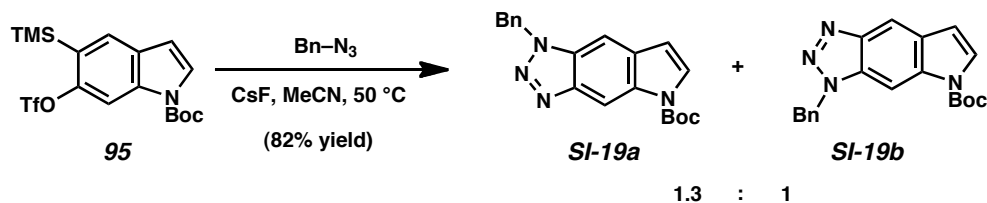

**N-Boc triazoles SI-19a and SI-19b.** To a stirred solution of *N*-Boc silyltriflate **95** (20 mg, 0.046 mmol) and benzyl azide<sup>13</sup> (30 mg, 0.23 mmol, 5 equiv) in MeCN (1 mL) was added CsF (21 mg, 0.14 mmol, 3 equiv). The reaction vessel was placed in an aluminum heating block maintained at 50 °C for 14 h. After cooling to 23 °C, the reaction mixture was filtered over silica gel (EtOAc eluent). Evaporation under reduced pressure afforded the crude products, which were further purified by flash chromatography (3:2 Hexanes:Et<sub>2</sub>O) to provide a mixture of *N*-Boc triazoles **SI-19a** and **SI-19b** (1.3:1 ratio of **SI-19a**:**SI-19b**, 13 mg, 82% yield). These compounds were characterized as a mixture. *R<sub>f</sub>* 0.29 (7:3 Hexanes:EtOAc); **SI-19a**: <sup>1</sup>H NMR (500 MHz, CDCl<sub>3</sub>): δ 8.76 (br s, 1H), 7.75 (br s, 1H), 7.35 (s, 1H), 7.34–7.25 (m, 5H), 6.56 (d, *J* = 3.8, 1H), 5.86 (s, 2H), 1.70 (s, 9H); **SI-19b**: <sup>1</sup>H NMR (500 MHz, CDCl<sub>3</sub>): δ 8.19 (br s, 1H), 8.15 (s, 1H), 7.64 (br s, 1H), 7.34–7.25 (m, 5H), 6.66 (d, *J* = 3.8, 1H), 5.87 (s, 2H), 1.64 (s, 9H); <sup>13</sup>C NMR (125 MHz, CDCl<sub>3</sub>): δ 149.5, 149.4, 145.1, 143.6, 136.0, 135.0, 134.9, 133.5, 132.8, 131.5, 130.2, 130.1, 129.9, 128.84, 128.81, 128.4, 128.2, 128.1, 127.31, 127.30, 110.2, 107.4, 106.7, 104.8, 98.9, 94.4, 84.1, 83.8, 52.1, 51.8, 28.14, 28.08; IR (film): 2979, 2933, 1727, 1143 cm<sup>-1</sup>; HRMS-ESI (*m/z*) [M + Na]<sup>+</sup> calcd for C<sub>20</sub>H<sub>20</sub>N<sub>4</sub>O<sub>2</sub>Na, 371.1484; found, 371.1473.

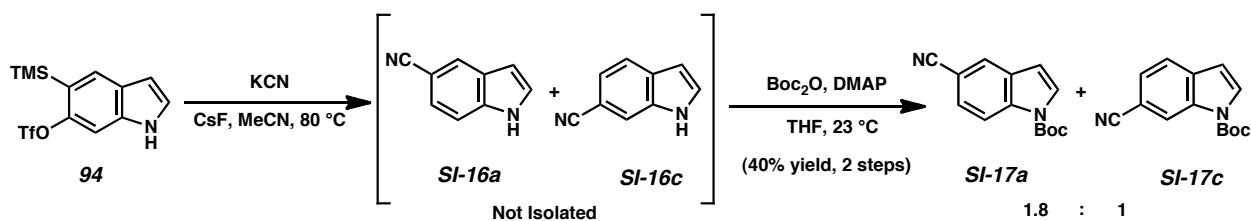

**N-H cyanoindoles SI-16a and SI-16c.** To a stirred solution of *N*-H silyltriflate **94** (20 mg, 0.059 mmol) and potassium cyanide (14.7 mg, 0.226 mmol, 3.8 equiv) in MeCN (1 mL) was added CsF (27 mg, 0.18 mmol, 3 equiv). The reaction vessel was placed in an aluminum heating block maintained at 80 °C for 14 h. After cooling to 23 °C, the reaction mixture was filtered over silica

gel (EtOAc eluent). Evaporation under reduced pressure afforded crude *N*-H cyanoindoles **SI-16a** and **SI-16c**. This crude mixture was dissolved in THF (1 mL) and treated with DMAP (1 mg, 0.0081 mmol, 0.14 equiv) and Boc<sub>2</sub>O (14.2 mg, 0.065 mmol, 1.1 equiv). The resulting mixture was stirred at 23 °C for an additional 14 h, then filtered over silica gel (EtOAc eluent). Evaporation under reduced pressure afforded the crude products, which were further purified by flash chromatography (95:5 Hexanes:Et<sub>2</sub>O → 9:1 Hexanes:Et<sub>2</sub>O) to provide a mixture of *N*-Boc cyanoindoles **SI-17a** and **SI-17c** (1.8:1 ratio of **SI-17a**:**SI-17c**, 4.4 mg, 40% yield). Spectral data of **SI-17a** and **SI-17c** match those reported above (S39) and below (S50), respectively.

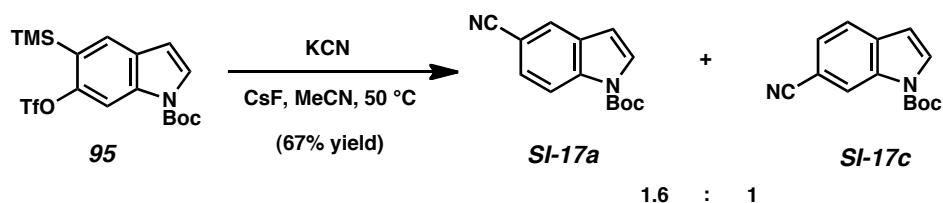

***N*-Boc cyanoindoles SI-17a and SI-17c.** To a stirred solution of *N*-Boc silyltriflate **95** (20 mg, 0.046 mmol) and potassium cyanide (38 mg, 0.584 mmol, 12.7 equiv) in MeCN (1 mL) was added CsF (21 mg, 0.14 mmol, 3 equiv). The reaction vessel was placed in an aluminum heating block maintained at 50 °C for 24 h. After cooling to 23 °C, the reaction mixture was filtered over silica gel (EtOAc eluent). Evaporation under reduced pressure afforded the crude products, which were further purified by flash chromatography (95:5 Hexanes:Et<sub>2</sub>O) to provide a mixture of *N*-Boc cyanoindoles **SI-17a** and **SI-17c** (1.6:1 ratio of **SI-17a**:**SI-17c**, 7.4 mg, 67% yield) as a white solid. Spectral data of **SI-17a** (S39) and **SI-17c** (S50) match those reported above and below, respectively.

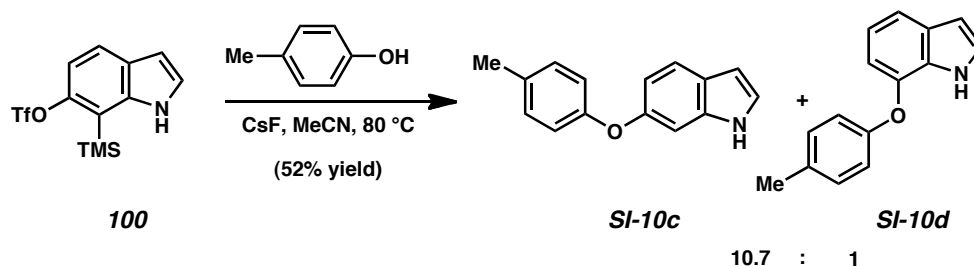

***N*-H ethers SI-10c and SI-10d.** To a stirred solution of *N*-H silyltriflate **100** (37.5 mg, 0.11 mmol) and *p*-cresol (60 mg, 0.56 mmol, 5 equiv) in MeCN (1.2 mL) was added CsF (51 mg, 0.33 mmol, 3 equiv). The reaction vessel was placed in an aluminum heating block maintained at 80 °C for 14 h. After cooling to 23 °C, the reaction mixture was filtered over silica gel (EtOAc eluent). Evaporation under reduced pressure afforded the crude products, which were purified by flash chromatography (3:1 Hexanes:CH<sub>2</sub>Cl<sub>2</sub>) to provide *N*-H ether **SI-10c** (11.8 mg) and crude **SI-10d**. Further purification by preparative TLC (3:2 Hexanes:CH<sub>2</sub>Cl<sub>2</sub>) afforded **SI-10d** (1.1 mg; 10.7:1 ratio of **SI-10c**:**SI-10d**, 52% combined yield). **SI-10c**: *R*<sub>f</sub> 0.12 (85:15 Hexanes:CH<sub>2</sub>Cl<sub>2</sub>); <sup>1</sup>H NMR (500 MHz, CDCl<sub>3</sub>): δ 8.05 (br s, 1H), 7.58 (d, *J* = 8.5, 1H), 7.16 (app. t, *J* = 2.9, 1H), 7.12 (d, *J* = 8.3, 2H), 7.01 (d, *J* = 1.8, 1H), 6.93–6.91 (m, 2H), 6.88 (dd, *J* = 6.4, 2.1, 1H), 6.54–6.53 (m, 1H), 2.33 (s, 3H); <sup>13</sup>C NMR (125 MHz, CDCl<sub>3</sub>): δ 156.1, 153.3, 136.1, 131.9, 130.0, 124.02, 123.97, 121.3, 118.1, 113.1, 102.5, 101.3, 20.5; IR (film): 3418, 2921, 1506, 1491, 1243, 1219 cm<sup>-1</sup>; HRMS-ESI (*m/z*) [M + H]<sup>+</sup> calcd for C<sub>15</sub>H<sub>14</sub>NO, 224.1075; found, 224.1075. **SI-10d**: *R*<sub>f</sub> 0.25 (85:15 Hexanes:CH<sub>2</sub>Cl<sub>2</sub>); <sup>1</sup>H NMR (500 MHz, CDCl<sub>3</sub>): δ 8.24 (br s, 1H), 7.40 (d, *J* = 7.9, 1H), 7.18 (app. t, *J* = 2.7, 1H), 7.13 (d, *J* = 8.3, 2H), 7.02 (app. t, *J* = 7.8, 1H), 6.96 (d, *J* = 8.5, 2H), 6.73 (d, *J* = 7.7, 1H), 6.58 (app. t, *J* = 2.8, 1H), 2.34 (s, 3H); <sup>13</sup>C NMR (125 MHz, CDCl<sub>3</sub>): δ 154.6, 142.6, 132.6, 130.3, 130.1, 127.7, 124.1, 120.1, 118.0, 115.8, 110.1, 102.9, 20.6; IR (film): 3426, 2924, 2852, 1713, 1505, 1241 cm<sup>-1</sup>; HRMS-ESI (*m/z*) [M + H]<sup>+</sup> calcd for C<sub>15</sub>H<sub>14</sub>NO, 224.1075; found, 224.1079.

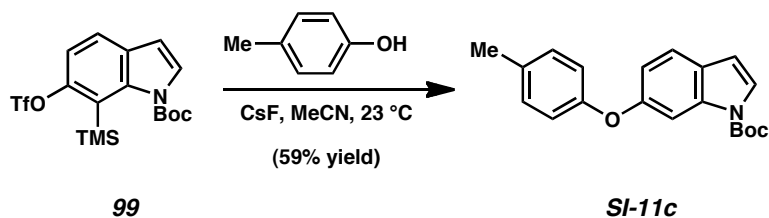

**N-Boc ether SI-11c.** To a stirred solution of *N*-Boc silyltriflate **99** (20 mg, 0.046 mmol) and *p*-cresol (24.7 mg, 0.23 mmol, 5 equiv) in MeCN (1 mL) at 23 °C was added CsF (21 mg, 0.14 mmol, 3 equiv). The solution was stirred for 18 h, then filtered over silica gel (EtOAc eluent). Evaporation under reduced pressure afforded the crude product, which was further purified by flash chromatography (85:15 Hexanes:CH<sub>2</sub>Cl<sub>2</sub> → 3:1 Hexanes:CH<sub>2</sub>Cl<sub>2</sub>) to provide *N*-Boc ether **SI-11c** (8.7 mg, 59% yield) as a light pink solid. *R*<sub>f</sub> 0.31 (4:1 Hexanes:CH<sub>2</sub>Cl<sub>2</sub>); <sup>1</sup>H NMR (500 MHz, CDCl<sub>3</sub>): δ 7.73 (br s, 1H), 7.55 (d, *J* = 3.5, 1H), 7.47 (d, *J* = 8.5, 1H), 7.13 (d, *J* = 8.3, 2H), 6.97–6.93 (m, 3H), 6.53 (dd, *J* = 3.7, 0.5, 1H), 2.33 (s, 3H), 1.58 (s, 9H); <sup>13</sup>C NMR (125 MHz, CDCl<sub>3</sub>): δ 155.4, 155.3, 149.6, 135.6, 132.4, 130.1, 126.1, 125.5, 121.3, 118.8, 114.7, 107.0, 105.5, 83.7, 27.9, 20.6; IR (film): 2979, 1735 cm<sup>-1</sup>; HRMS-ESI (*m/z*) [M + Na]<sup>+</sup> calcd for C<sub>20</sub>H<sub>21</sub>NO<sub>3</sub>Na, 346.1419; found, 346.1412.

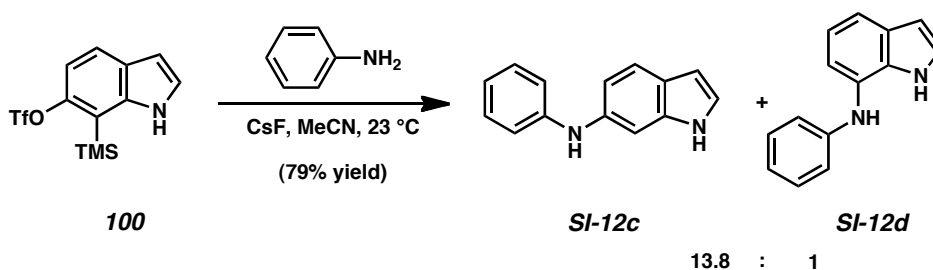

**N-H amines SI-12c and SI-12d.** To a stirred solution of *N*-H silyltriflate **100** (40 mg, 0.12 mmol) and aniline (54 μL, 0.59 mmol, 5 equiv) in MeCN (1.2 mL) at 23 °C was added CsF (54 mg, 0.36 mmol, 3 equiv). The solution was stirred for 14 h, then filtered over silica gel (EtOAc eluent). Evaporation under reduced pressure afforded the crude products, which were further purified by flash chromatography (2:3 Hexanes:CH<sub>2</sub>Cl<sub>2</sub>) to provide a mixture of *N*-H amines **SI-12c** and **SI-12d** (13.8:1 ratio of **SI-12c**:**SI-12d**, 19.6 mg, 79% yield). An analytical sample of **SI-12c** was obtained by preparative TLC (3:7 Hexanes:CH<sub>2</sub>Cl<sub>2</sub>). **SI-12c**: *R*<sub>f</sub> 0.46 (3:7

Hexanes:CH<sub>2</sub>Cl<sub>2</sub>); <sup>1</sup>H NMR (500 MHz, CDCl<sub>3</sub>): δ 7.98 (br s, 1H), 7.55 (d, *J* = 9.0, 1H), 7.26–7.22 (m, 2H), 7.178–7.176 (m, 1H), 7.12 (app. t, *J* = 3.0, 1H), 7.04–7.03 (m, 2H), 9.19 (dd, *J* = 8.5, 2.0, 1H), 6.87 (app. t, *J* = 7.5, 1H), 6.51–6.50 (m, 1H), 5.70 (br s, 1H); <sup>13</sup>C NMR (125 MHz, CDCl<sub>3</sub>): δ 144.9, 137.9, 136.5, 129.2, 123.5, 123.4, 121.2, 119.7, 116.3, 114.8, 102.5, 101.6; IR (film): 3399, 3048, 1627, 1597, 1494 cm<sup>-1</sup>; HRMS-ESI (*m/z*) [M + H]<sup>+</sup> calcd for C<sub>14</sub>H<sub>13</sub>N<sub>2</sub>, 209.1079; found, 209.1078. **SI-12d**: *R*<sub>f</sub> 0.46.

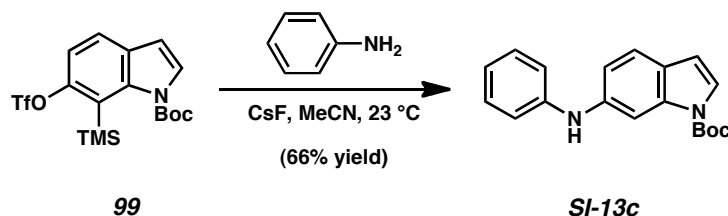

***N*-Boc amine SI-13c.** To a stirred solution of *N*-H silyltriflate **99** (40 mg, 0.091 mmol) and aniline (43 μL, 0.46 mmol, 5 equiv) in MeCN (1 mL) at 23 °C was added CsF (42 mg, 0.27 mmol, 3 equiv). The solution was stirred for 14 h, then filtered over silica gel (EtOAc eluent). Evaporation under reduced pressure afforded the crude product, which was further purified by flash chromatography (97:3 Hexanes:Et<sub>2</sub>O) to provide *N*-Boc amine **SI-13c** (18.6 mg, 66% yield). *R*<sub>f</sub> 0.17 (95:5 Hexanes:CH<sub>2</sub>Cl<sub>2</sub>); <sup>1</sup>H NMR (500 MHz, 40 °C, CDCl<sub>3</sub>): δ 7.94 (br s, 1H), 7.50 (d, *J* = 3.7, 1H), 7.43 (d, *J* = 8.4, 1H), 7.26 (app. t, *J* = 7.8, 2H), 7.09 (d, *J* = 7.6, 2H), 7.00 (dd, *J* = 8.3, 2.0, 1H), 6.91 (app. t, *J* = 7.3, 1H), 6.50 (d, *J* = 3.7, 1H), 5.75 (br s, 1H), 1.64 (s, 9H); <sup>13</sup>C NMR (125 MHz, 40 °C, CDCl<sub>3</sub>): δ 149.7, 144.0, 140.3, 136.2, 129.2, 125.2, 124.7, 121.2, 120.4, 117.2, 115.3, 107.1, 105.2, 83.4, 28.1; IR (film): 3391, 2979, 2931, 1727, 1337, 1149 cm<sup>-1</sup>; HRMS-ESI (*m/z*) [M + Na]<sup>+</sup> calcd for C<sub>19</sub>H<sub>20</sub>N<sub>2</sub>O<sub>2</sub>Na, 331.1422; found, 331.1423.

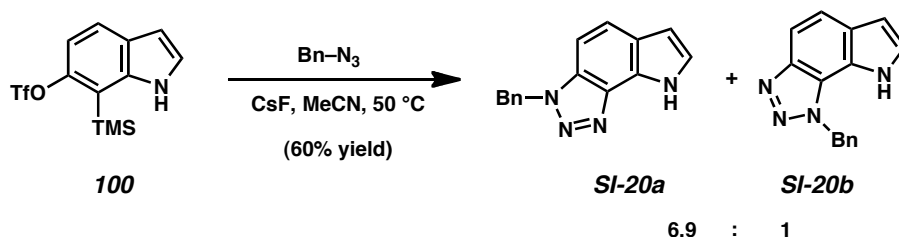

***N*-H triazoles SI-20a and SI-20b.** To a stirred solution of *N*-H silyltriflate **100** (20 mg, 0.059 mmol) and benzyl azide<sup>13</sup> (39 mg, 0.30 mmol, 5 equiv) in MeCN (1 mL) was added CsF (27 mg, 0.18 mmol, 3 equiv). The reaction vessel was placed in an aluminum heating block maintained at 50 °C for 14 h. After cooling to 23 °C, the reaction mixture was filtered over silica gel (EtOAc eluent). Evaporation under reduced pressure afforded the crude products, which were further purified by flash chromatography (85:15 Hexanes:EtOAc) to provide a mixture of *N*-H triazoles **SI-20a** and **SI-20b** (6.9:1 ratio of **SI-20a**:**SI-20b**, 8.8 mg, 60% yield). An analytical sample of **SI-20a** was obtained by preparative TLC (4:1 Hexanes:Acetone). **SI-20a**:  $R_f$  0.46 (3:1 Hexanes:EtOAc); <sup>1</sup>H NMR (500 MHz, CDCl<sub>3</sub>): δ 10.3 (br s, 1H), 7.68 (d,  $J = 8.7$ , 1H), 7.36–7.28 (m, 6H), 7.07 (d,  $J = 8.7$ , 1H), 6.72 (app. t,  $J = 2.3$ , 1H), 5.91 (s, 2H); <sup>13</sup>C NMR (125 MHz, CDCl<sub>3</sub>): δ 134.9, 134.8, 130.9, 128.8, 128.2, 127.3, 124.4, 123.7, 122.6, 122.3, 104.0, 101.7, 52.4; IR (film): 3181, 3113, 2921, 2851, 1225 cm<sup>-1</sup>; HRMS-ESI ( $m/z$ ) [ $M + Na$ ]<sup>+</sup> calcd for C<sub>15</sub>H<sub>12</sub>N<sub>4</sub>Na, 271.0960; found, 271.0963. **SI-20b**:  $R_f$  0.46 (3:1 Hexanes:EtOAc); 7.75 (d,  $J = 8.8$ , 1H), 7.68 (br s, 1H), 7.58 (d,  $J = 8.9$ , 1H), 7.46 (m, 3H), 7.35–7.34 (m, 2H), 7.01 (app. t,  $J = 2.5$ , 1H), 6.63 (app. t,  $J = 2.3$ , 1H), 6.05 (s, 2H); <sup>13</sup>C NMR (125 MHz, CDCl<sub>3</sub>): δ 144.7, 134.9, 129.8, 129.1, 127.0, 126.5, 123.7, 121.9, 118.7, 118.2, 111.8, 104.6, 53.5; IR (film): 3256, 2918, 1235 cm<sup>-1</sup>; HRMS-ESI ( $m/z$ ) [ $M + Na$ ]<sup>+</sup> calcd for C<sub>15</sub>H<sub>12</sub>N<sub>4</sub>Na, 271.0960; found, 271.0963.

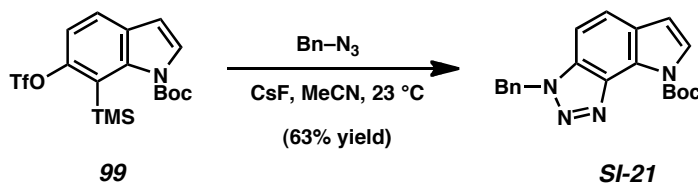

***N*-Boc triazole SI-21.** To a stirred solution of *N*-Boc silyltriflate **99** (20 mg, 0.046 mmol) and benzyl azide<sup>13</sup> (30.4 mg, 0.23 mmol, 5 equiv) in MeCN (1 mL) at 23 °C was added CsF (21 mg,



0.14 mmol, 3 equiv). The solution was stirred for 18 h, then filtered over silica gel (EtOAc eluent). Evaporation under reduced pressure afforded the crude product, which was further purified by flash chromatography (95:5 Benzene:Et<sub>2</sub>O) to provide *N*-Boc triazole **SI-21** (10 mg, 63% yield). *R*<sub>f</sub> 0.31 (3:2 Hexanes:Et<sub>2</sub>O); <sup>1</sup>H NMR (500 MHz, CDCl<sub>3</sub>): δ 6.68 (d, *J* = 3.6, 1H), 7.58 (d, *J* = 8.6, 1H), 7.31–7.24 (m, 5H), 7.21 (d, *J* = 8.6, 1H), 6.70 (d, *J* = 3.6, 1H), 5.90 (s, 2H), 1.78 (s, 9H); <sup>13</sup>C NMR (125 MHz, CDCl<sub>3</sub>): δ 149.0, 135.9, 134.9, 132.4, 128.8, 128.2, 127.3, 126.4, 125.1, 123.7, 121.7, 107.8, 105.0, 84.8, 52.2, 28.1; IR (film): 2979, 2933, 1760, 1732, 1327, 1150 cm<sup>-1</sup>; HRMS-ESI (*m/z*) [*M* + Na]<sup>+</sup> calcd for C<sub>20</sub>H<sub>20</sub>N<sub>4</sub>O<sub>2</sub>Na, 371.1484; found, 371.1478.

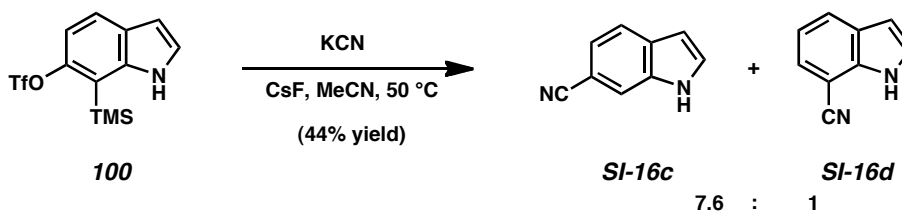

***N*-H cyanoindoles SI-16c and SI-16d.** To a stirred solution of *N*-H silyltriflate **100** (20 mg, 0.060 mmol) and potassium cyanide (49.0 mg, 0.30 mmol, 5 equiv) in MeCN (1 mL) was added CsF (27 mg, 0.18 mmol, 3 equiv). The reaction vessel was placed in an aluminum heating block maintained at 50 °C for 14 h. After cooling to 23 °C, the reaction mixture was filtered over silica gel (EtOAc eluent). Evaporation under reduced pressure afforded the crude products, which were further purified by flash chromatography (4:1 Hexanes:EtOAc) to provide a mixture of *N*-H cyanoindoles **SI-16c** and **SI-16d** (7.6:1 ratio of **SI-16c**:**SI-16d**, 5.4 mg, 44% yield). An analytical sample of **SI-16c** was obtained by preparative TLC (1:1 Hexanes:Et<sub>2</sub>O). **SI-16c**: *R*<sub>f</sub> 0.29 (3:1 Hexanes:EtOAc); <sup>1</sup>H NMR (500 MHz, 40 °C, CDCl<sub>3</sub>): δ 8.51 (br s, 1H), 7.76 (s, 1H), 7.70 (d, *J* = 8.2, 1H), 7.43 (app. t, *J* = 2.8, 1H), 7.36 (dd, *J* = 8.2, 1.1, 1H), 6.65–6.64 (m, 1H); <sup>13</sup>C NMR (125 MHz, CDCl<sub>3</sub>): δ 134.5, 131.0, 127.8, 122.7, 121.4, 120.5, 115.8, 104.4, 103.4; IR (film): 3414, 2220, 1348 cm<sup>-1</sup>; HRMS-ESI (*m/z*) [*M* + Na]<sup>+</sup> calcd for C<sub>9</sub>H<sub>6</sub>N<sub>2</sub>Na, 165.0429; found, 165.0430. **SI-16d**: *R*<sub>f</sub> 0.29 (3:1 Hexanes:EtOAc).

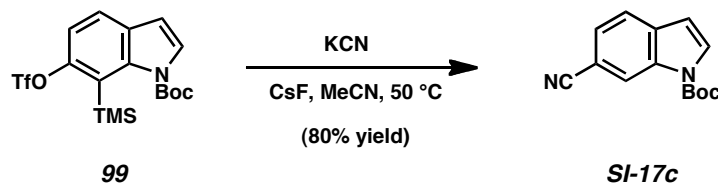

***N*-Boc cyanoindole SI-17c.** To a stirred solution of *N*-Boc silyltriflate **99** (22.0 mg, 0.050 mmol) and potassium cyanide (41.5 mg, 0.25 mmol, 5 equiv) in MeCN (1.0 mL) was added CsF (23.0 mg, 0.15 mmol, 3 equiv). The reaction vessel was placed in an aluminum heating block maintained at 50 °C for 14 h. After cooling to 23 °C, the reaction mixture was filtered over silica gel (EtOAc eluent). Evaporation under reduced pressure afforded the crude product, which was further purified by flash chromatography (9:1 Hexanes:Et<sub>2</sub>O) to provide cyanoindole **SI-17c** (9.8 mg, 80% yield) as a white solid. *R<sub>f</sub>* 0.26 (9:1 Hexanes:Et<sub>2</sub>O); <sup>1</sup>H NMR (500 MHz, 40 °C, CDCl<sub>3</sub>): δ 8.50 (s, 1H), 7.76 (d, *J* = 3.7, 1H), 7.62 (d, *J* = 8.1, 1H), 7.47 (dd, *J* = 8.1, 1.2, 1H), 6.62 (d, *J* = 3.6, 1H), 1.70 (s, 9H); <sup>13</sup>C NMR (125 MHz, CDCl<sub>3</sub>): δ 148.8, 134.2, 133.7, 129.1, 125.6, 121.5, 119.7, 119.6, 107.2, 107.1, 84.9, 28.0; IR (film): 2981, 2224, 1736, 1342 cm<sup>-1</sup>; HRMS-ESI (*m/z*) [M + Na]<sup>+</sup> calcd for C<sub>14</sub>H<sub>14</sub>N<sub>2</sub>O<sub>2</sub>Na, 265.0953; found, 265.0948.

### G. Influence of a C3 halide substituent on the regioselectivities of 4,5-indolyne reactions.

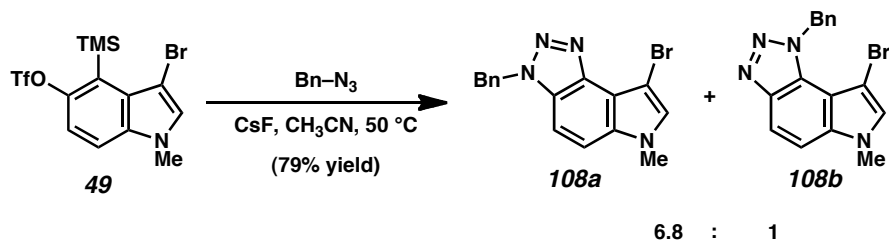

**3-Bromo triazoles 108a and 108b.** To a solution of 3-bromo silyltriflate **49** (41.6 mg, 0.097 mmol), and benzyl azide<sup>13</sup> (55.8 mg, 0.420 mmol, 4.3 equiv) in MeCN (1 mL) was added CsF (45.2 mg, 0.300 mmol, 3.1 equiv). The reaction vessel was placed in an aluminum heating block maintained at  $50\text{ }^\circ\text{C}$  for 7.75 h. After cooling to  $23\text{ }^\circ\text{C}$ , the reaction mixture was filtered over silica gel (EtOAc eluent). Evaporation under reduced pressure afforded the crude product, which was further purified by flash chromatography (2:1 Hexanes:EtOAc) to give a mixture of 3-bromo triazoles **108a** and **108b** (6.8:1 ratio of **108a**:**108b**, 26.0 mg, 79% yield) as a white solid. These compounds were characterized as a mixture.  $R_f$  0.21 (2:1 Hexanes:EtOAc); **108a**:  $^1\text{H NMR}$  (500 MHz,  $\text{CD}_2\text{Cl}_2$ ):  $\delta$  7.16 (d,  $J = 9.0$ , 1H), 7.35–7.23 (m, 5H), 7.22 (s, 1H), 7.18 (d,  $J = 9.0$ , 1H), 5.89 (s, 2H), 3.85 (s, 3H); **108b**:  $^1\text{H NMR}$  (500 MHz,  $\text{CD}_2\text{Cl}_2$ ):  $\delta$  7.85 (d,  $J = 9.1$ , 1H), 7.35–7.23 (m, 4H), 7.18 (s, 1H), 7.10–7.06 (m, 2H), 6.55 (s, 2H), 3.87 (s, 3H);  $^{13}\text{C NMR}$  (125 MHz,  $\text{CDCl}_3$ ):  $\delta$  143.0, 139.9, 137.0, 135.8, 135.2, 132.8, 129.4, 129.0, 128.6, 128.4, 128.3, 128.0, 127.8, 127.6, 127.4, 126.7, 117.0, 114.6, 111.6, 110.2, 109.1, 104.3, 87.9, 86.5, 54.8, 52.4, 34.1, 33.9; IR (film): 3028, 2945, 1447, 1307, 1102  $\text{cm}^{-1}$ ; HRMS-ESI ( $m/z$ )  $[\text{M} + \text{Na}]^+$  calculated for  $\text{C}_{16}\text{H}_{13}\text{N}_4\text{BrNa}$ , 363.0221; found, 363.0227. The major isomer was identified by dissolving the mixture of isomers in EtOAc and exposing the mixture to a balloon of  $\text{H}_2$  in the presence of Pd/C (10 mol%) and  $\text{Et}_3\text{N}$  (1 equiv) to afford the corresponding debrominated compounds. Spectral data of the debrominated compounds match those previously reported.<sup>1</sup>

**<sup>1</sup>H NMR Spectra:**

Current Data Parameters  
 NAME AEG-1-217b  
 EXPNO 1  
 PROCNO 1

F2 - Acquisition Parameters  
 Date\_ 20100530  
 Time 18.34  
 INSTRUM arx500  
 PROBHD 5 mm broadband  
 PULPROG zg30  
 TD 65536  
 SOLVENT CDCl3  
 NS 8  
 DS 0  
 SWH 10000.000 Hz  
 FIDRES 0.152588 Hz  
 AQ 3.2768500 sec  
 RG 1024  
 DW 50.000 usec  
 DE 71.43 usec  
 TE 300.0 K  
 D1 2.00000000 sec  
 P1 11.00 usec  
 SFO1 500.1330008 MHz  
 NUCLEUS 1H

F2 - Processing parameters  
 SI 32768  
 SF 500.1300236 MHz  
 WDW EM  
 SSB 0  
 LB 0.00 Hz  
 GB 0  
 PC 1.00

AEG-1-217b

7.518  
7.515  
7.509  
7.505  
7.502  
7.499  
7.485  
7.481  
7.470  
7.467  
7.458  
7.454  
7.357  
7.354  
7.351  
7.344  
7.342  
7.340  
7.338  
7.336  
7.328  
7.325  
7.322  
7.296  
7.280  
7.202  
7.200  
7.198  
7.116  
6.964  
6.948  
6.023  
5.840  
5.838  
3.784

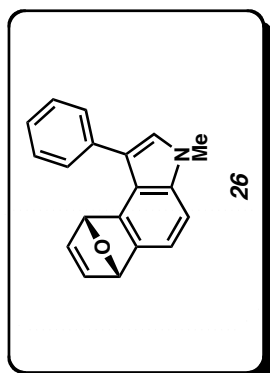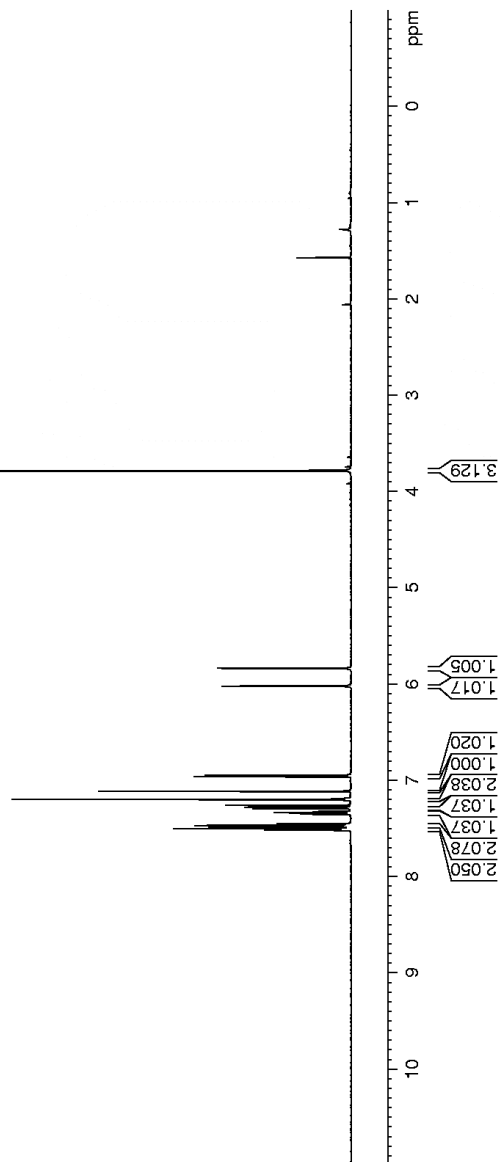

Current Data Parameters  
 NAME AEG-1-166a  
 EXPNO 1  
 PROCNO 1

F2 - Acquisition Parameters  
 Date\_ 20100404  
 Time 11.23  
 INSTRUM arx500  
 PROBHD 5 mm broadband  
 PULPROG zg30  
 TD 65536  
 SOLVENT CDCl3  
 NS 8  
 DS 0  
 SWH 10000.000 Hz  
 FIDRES 0.152588 Hz  
 AQ 3.2768500 sec  
 RG 512  
 DW 50.000 usec  
 DE 71.43 usec  
 TE 300.0 K  
 D1 2.0000000 sec  
 P1 11.00 usec  
 SFO1 500.1330008 MHz  
 NUCLEUS 1H

F2 - Processing parameters  
 SI 32768  
 SF 500.1299977 MHz  
 WDW EM  
 SSB 0  
 LB 0.30 Hz  
 GB 0  
 PC 1.00

AEG-1-166a

7.159  
 7.156  
 7.049  
 7.031  
 6.540  
 6.522  
 6.390

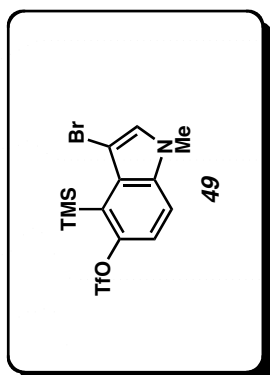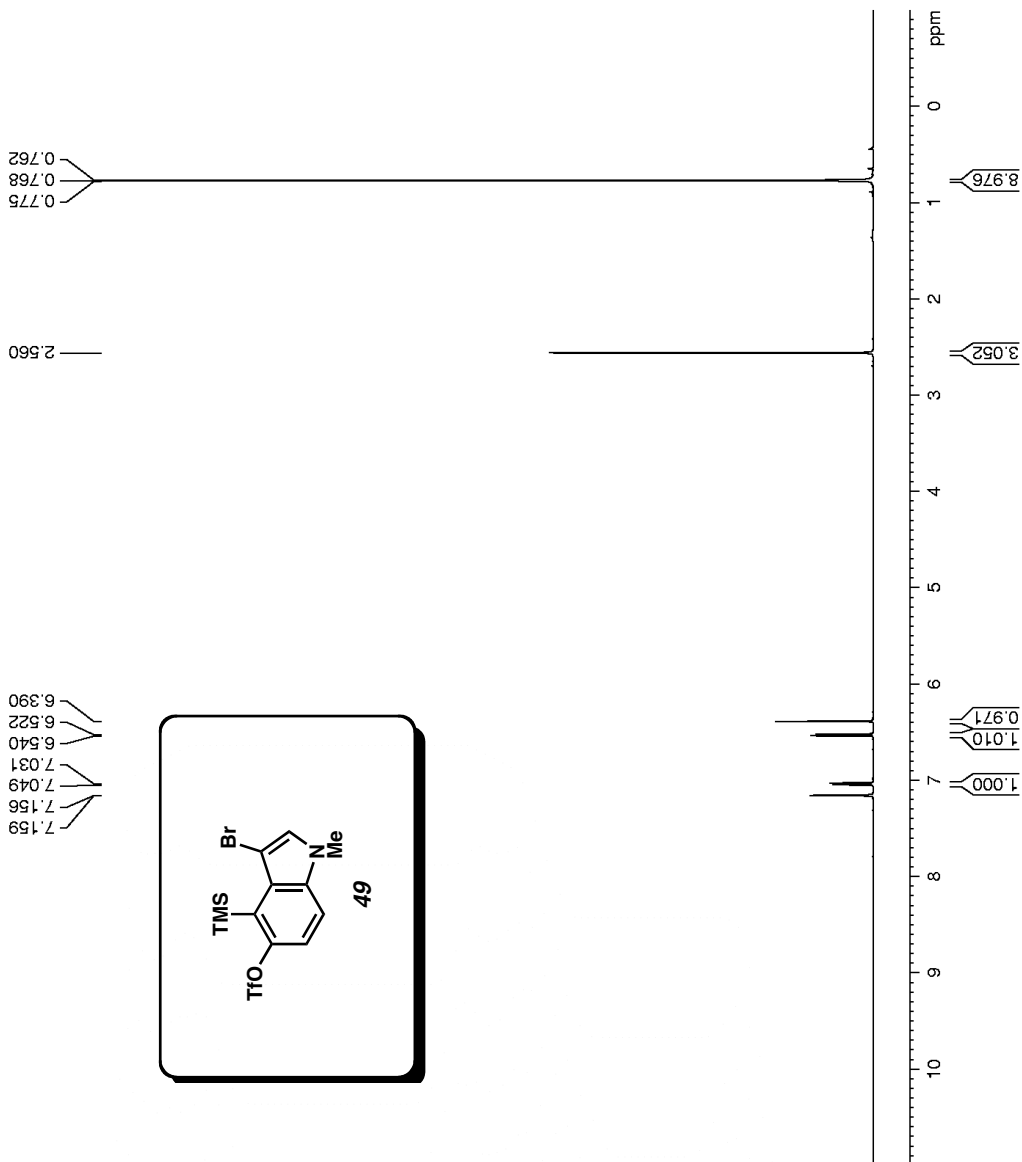

Current Data Parameters  
 NAME AEG-1-106a2  
 EXPNO 1  
 PROCNO 1

F2 - Acquisition Parameters  
 Date\_ 20100430  
 Time 16.30  
 INSTRUM arx500  
 PROBHD 5 mm broadband  
 PULPROG zg30  
 TD 65536  
 SOLVENT CDCl3  
 NS 8  
 DS 0  
 SWH 10000.000 Hz  
 FIDRES 0.152588 Hz  
 AQ 3.2768500 sec  
 RG 1024  
 DW 50.000 usec  
 DE 71.43 usec  
 TE 300.0 K  
 D1 2.00000000 sec  
 P1 11.00 usec  
 SFO1 500.1330008 MHz  
 NUCLEUS 1H

F2 - Processing parameters  
 SI 32768  
 SF 500.1300237 MHz  
 WDW EM  
 SSB 0  
 LB 0.30 Hz  
 GB 0  
 PC 1.00

AEG-1-106a2

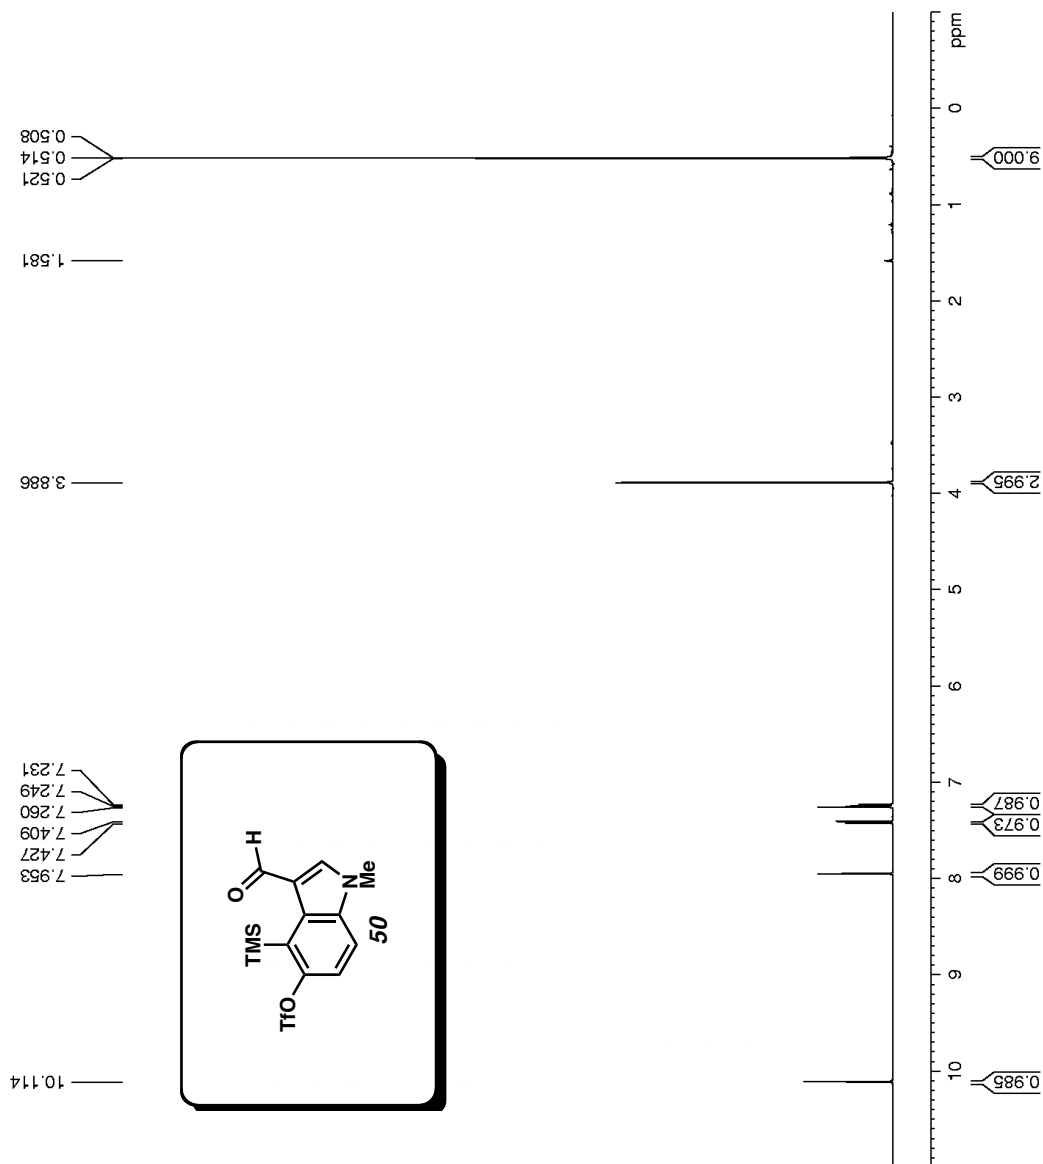

Current Data Parameters  
 NAME AEG-1-201a4  
 EXPNO 1  
 PROCNO 1

F2 - Acquisition Parameters  
 Date\_ 20100513  
 Time 15:29  
 INSTRUM avance500  
 PROBHD 5 mm bb-Z Z800  
 PULPROG zg30  
 TD 65536  
 SOLVENT CDCl3  
 NS 8  
 DS 0  
 SWH 10000.000 Hz  
 FIDRES 0.152588 Hz  
 AQ 3.2769001 sec  
 RG 128  
 DW 50.000 usec  
 DE 6.00 usec  
 TE 297.8 K  
 D1 2.0000000 sec  
 MCREST 0.0000000 sec  
 MCWRK 0.0150000 sec

===== CHANNEL f1 =====  
 NUC1 1H  
 P1 12.00 usec  
 PL1 0.00 dB  
 SFO1 500.3330020 MHz

F2 - Processing parameters  
 SI 32768  
 SF 500.3300220 MHz  
 WDW EM  
 SSB 0  
 LB 1.00 Hz  
 GB 0  
 PC 1.00

AEG-1-201a4

7.493  
7.260  
7.218  
7.201  
7.143  
7.125

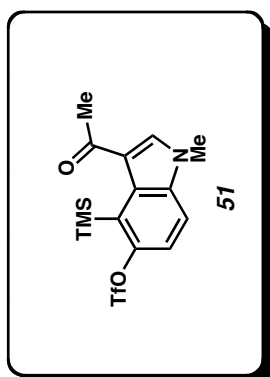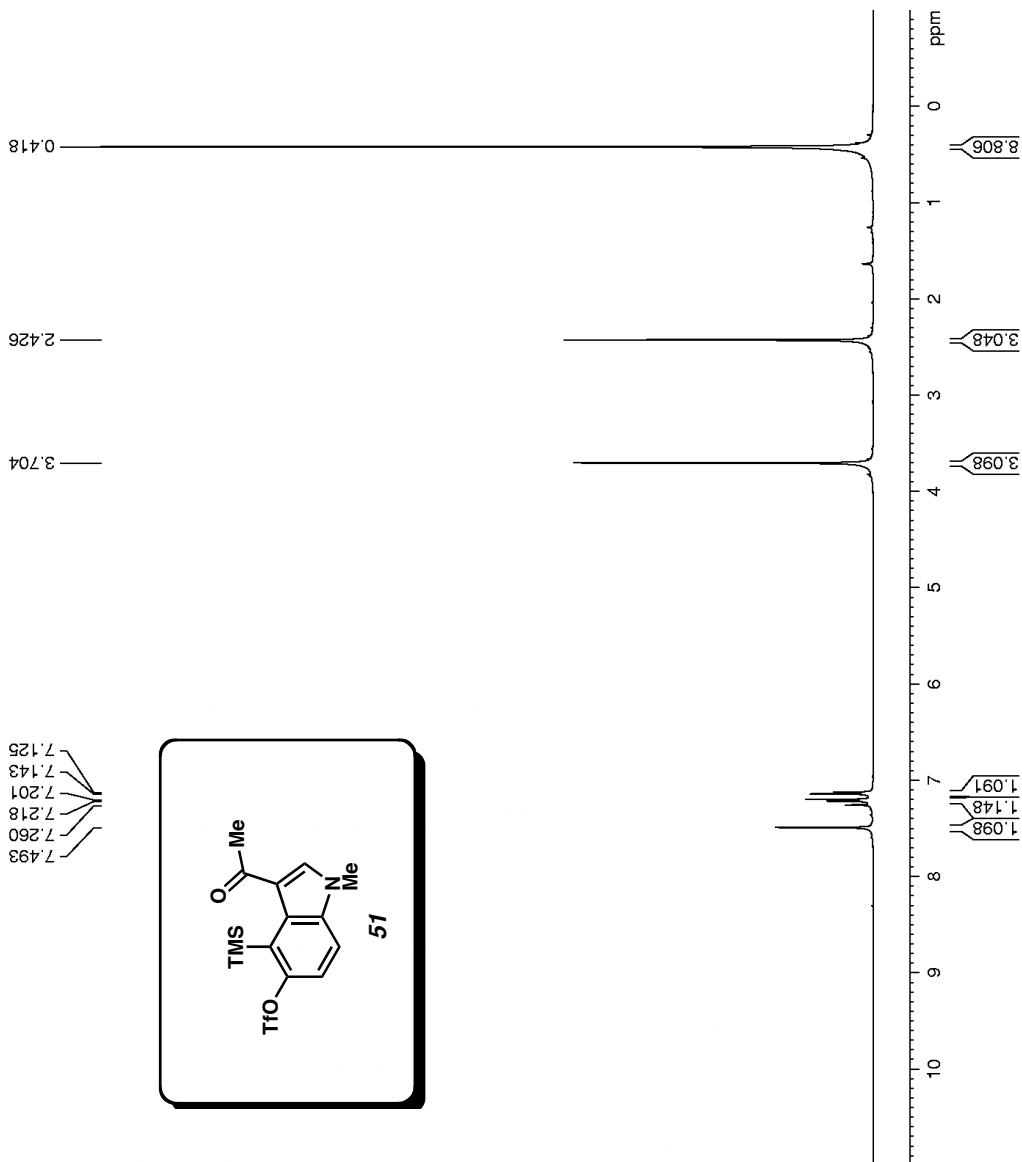



Current Data Parameters  
 NAME AEG-1-205a3  
 EXPNO 1  
 PROCNO 1

F2 - Acquisition Parameters  
 Date\_ 20100513  
 Time 16.20  
 INSTRUM arx500  
 PROBHD 5 mm broadband  
 PULPROG zg30  
 TD 65536  
 SOLVENT CDCl3  
 NS 8  
 DS 0  
 SWH 10000.000 Hz  
 FIDRES 0.152588 Hz  
 AQ 3.2768500 sec  
 RG 1430  
 DW 50.000 usec  
 DE 71.43 usec  
 TE 300.0 K  
 D1 2.0000000 sec  
 P1 11.00 usec  
 SFO1 500.1330008 MHz  
 NUCLEUS 1H

F2 - Processing parameters  
 SI 32768  
 SF 500.1300000 MHz  
 WDW EM  
 SSB 0  
 LB 1.00 Hz  
 GB 0  
 PC 1.00

AEG-1-203a3

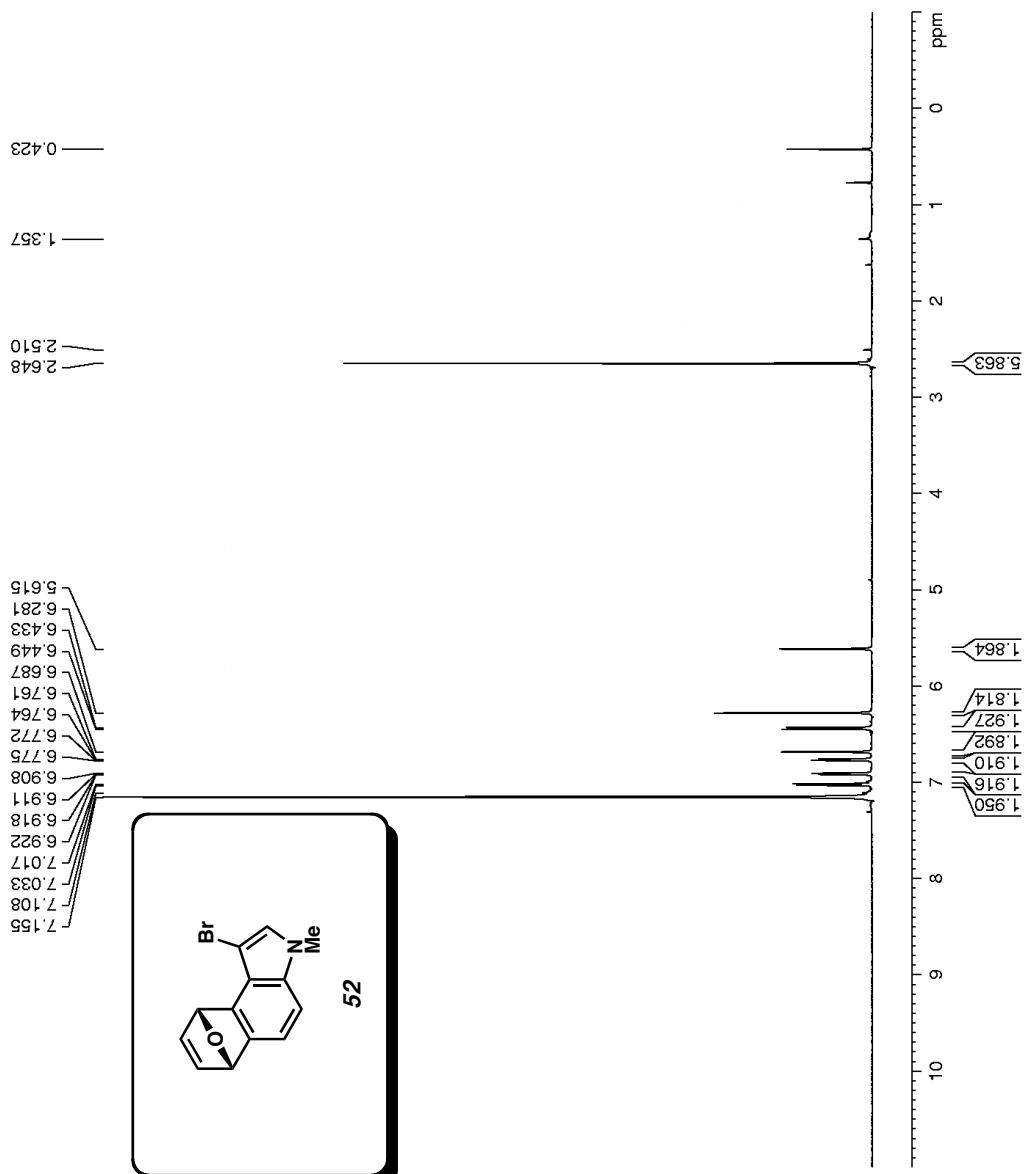



Current Data Parameters  
 NAME AEG-1-190a5  
 EXPNO 1  
 PROCNO 1

F2 - Acquisition Parameters  
 Date\_ 20100504  
 Time 15.11  
 INSTRUM arx500  
 PROBHD 5 mm broadband  
 PULPROG zg30  
 TD 65536  
 SOLVENT CDCl3  
 NS 8  
 DS 0  
 SWH 10000.000 Hz  
 FIDRES 0.152588 Hz  
 AQ 3.2768500 sec  
 RG 1024  
 DW 50.000 usec  
 DE 71.43 usec  
 TE 300.0 K  
 D1 2.00000000 sec  
 P1 11.00 usec  
 SFO1 500.1330008 MHz  
 NUCLEUS 1H

F2 - Processing parameters  
 SI 32768  
 SF 500.1300234 MHz  
 WDW EM  
 SSB 0  
 LB 0.30 Hz  
 GB 0  
 PC 1.00

AEG-1-190a5

5.810  
6.808  
6.886  
6.902  
6.902  
7.075  
7.079  
7.086  
7.090  
7.238  
7.242  
7.249  
7.253  
7.260  
7.260  
7.273  
7.288  
7.649

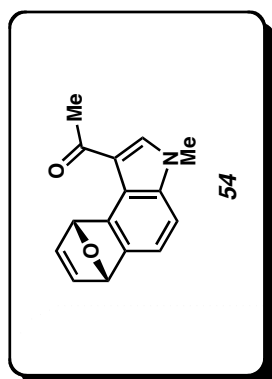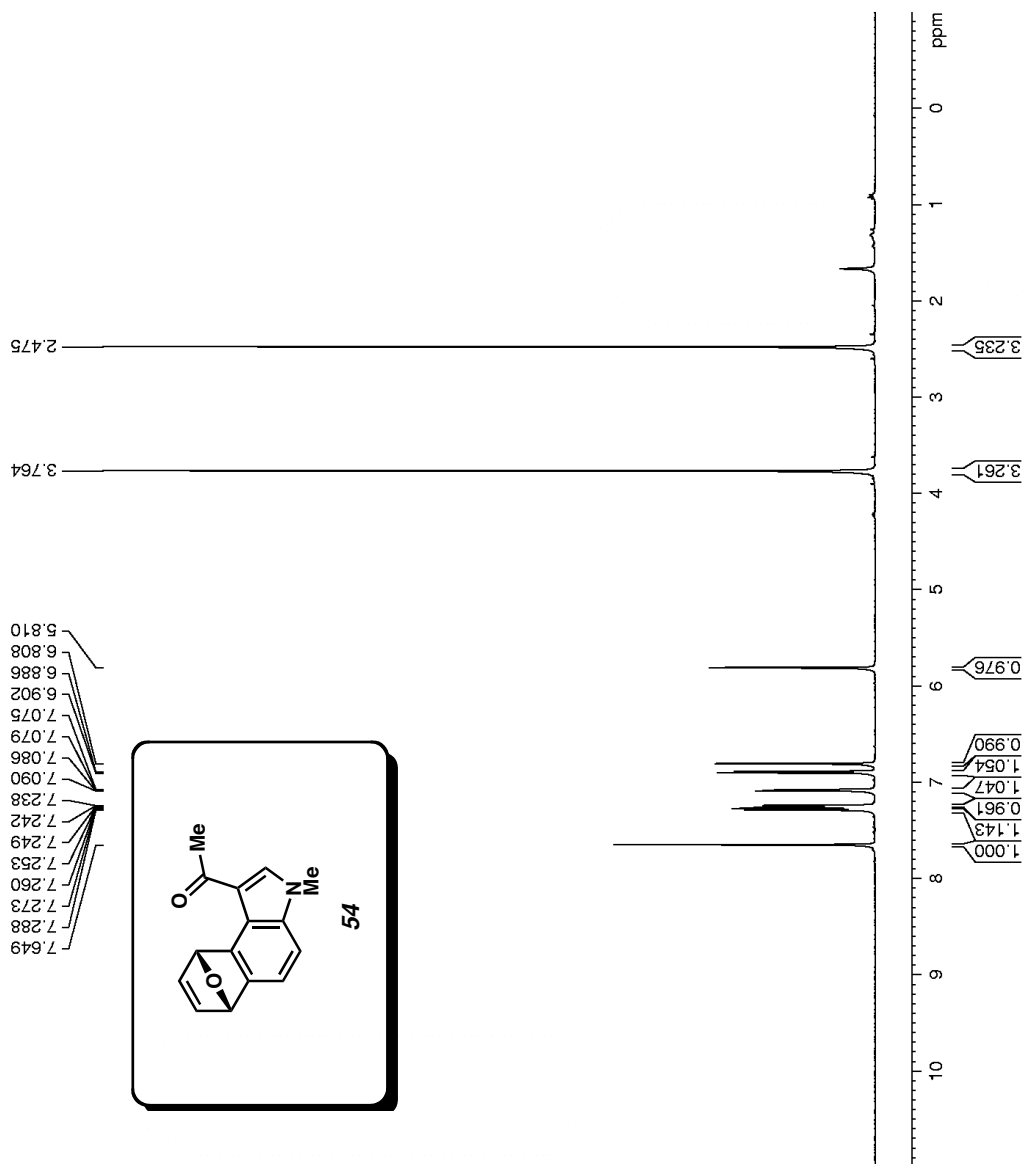

Current Data Parameters  
 NAME AEG-1-209b  
 EXPNO 1  
 PROCNO 1

F2 - Acquisition Parameters  
 Date\_ 20100516  
 Time 19:17  
 INSTRUM arx500  
 PROBHD 5 mm broadband  
 PULPROG zg30  
 TD 65536  
 SOLVENT CDCl3  
 NS 8  
 DS 0  
 SWH 10000.000 Hz  
 FIDRES 0.152588 Hz  
 AQ 3.2768500 sec  
 RG 256  
 DW 50.000 usec  
 DE 71.43 usec  
 TE 300.0 K  
 P1 2.00000000 sec  
 P2 11.00 usec  
 SFO1 500.1330008 MHz  
 NUCLEUS 1H

F2 - Processing parameters  
 SI 32768  
 SF 500.1300237 MHz  
 WDW EM  
 SSB 0  
 LB 0.30 Hz  
 GB 0  
 PC 1.00

AEG-1-209b

7.124  
 7.142  
 7.313  
 7.330  
 7.677

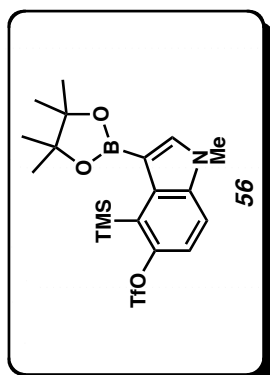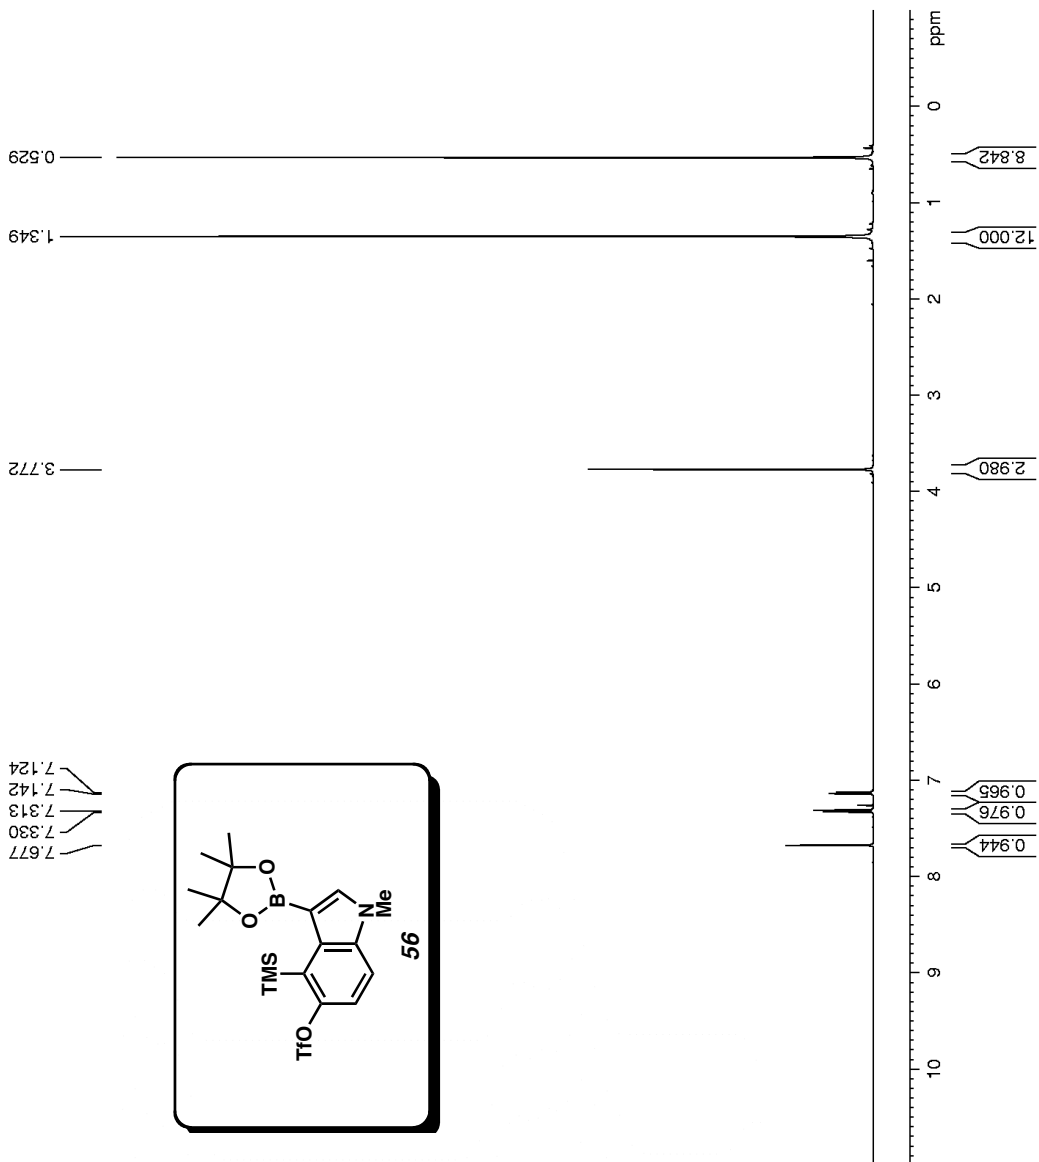

Current Data Parameters  
 NAME AEG-1-214b2  
 EXPNO 1  
 PROCNO 1

F2 - Acquisition Parameters  
 Date\_ 20100527  
 Time 15:30  
 INSTRUM advance500  
 PROBHD 5 mm bb-Z Z800  
 PULPROG zg30  
 TD 65536  
 SOLVENT CDCl3  
 NS 8  
 DS 0  
 SWH 10000.000 Hz  
 FIDRES 0.152588 Hz  
 AQ 3.2769001 sec  
 RG 90.5  
 DW 50.000 usec  
 DE 6.00 usec  
 TE 297.2 K  
 D1 2.00000000 sec  
 MCREST 0.00000000 sec  
 MCWRK 0.01500000 sec

===== CHANNEL f1 =====  
 NUC1 1H  
 P1 12.00 usec  
 PL1 0.00 dB  
 SFO1 500.3330020 MHz

F2 - Processing parameters  
 SI 32768  
 SF 500.3300220 MHz  
 WDW EM  
 SSB 0  
 LB 0.00 Hz  
 GB 0  
 PC 1.00

AEG-1-214b2

7.466  
7.452  
7.423  
7.408  
7.403  
7.393  
7.385  
7.335  
7.320  
7.306  
7.183  
7.165  
7.160

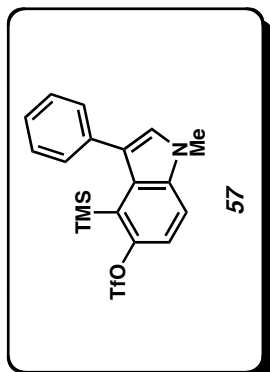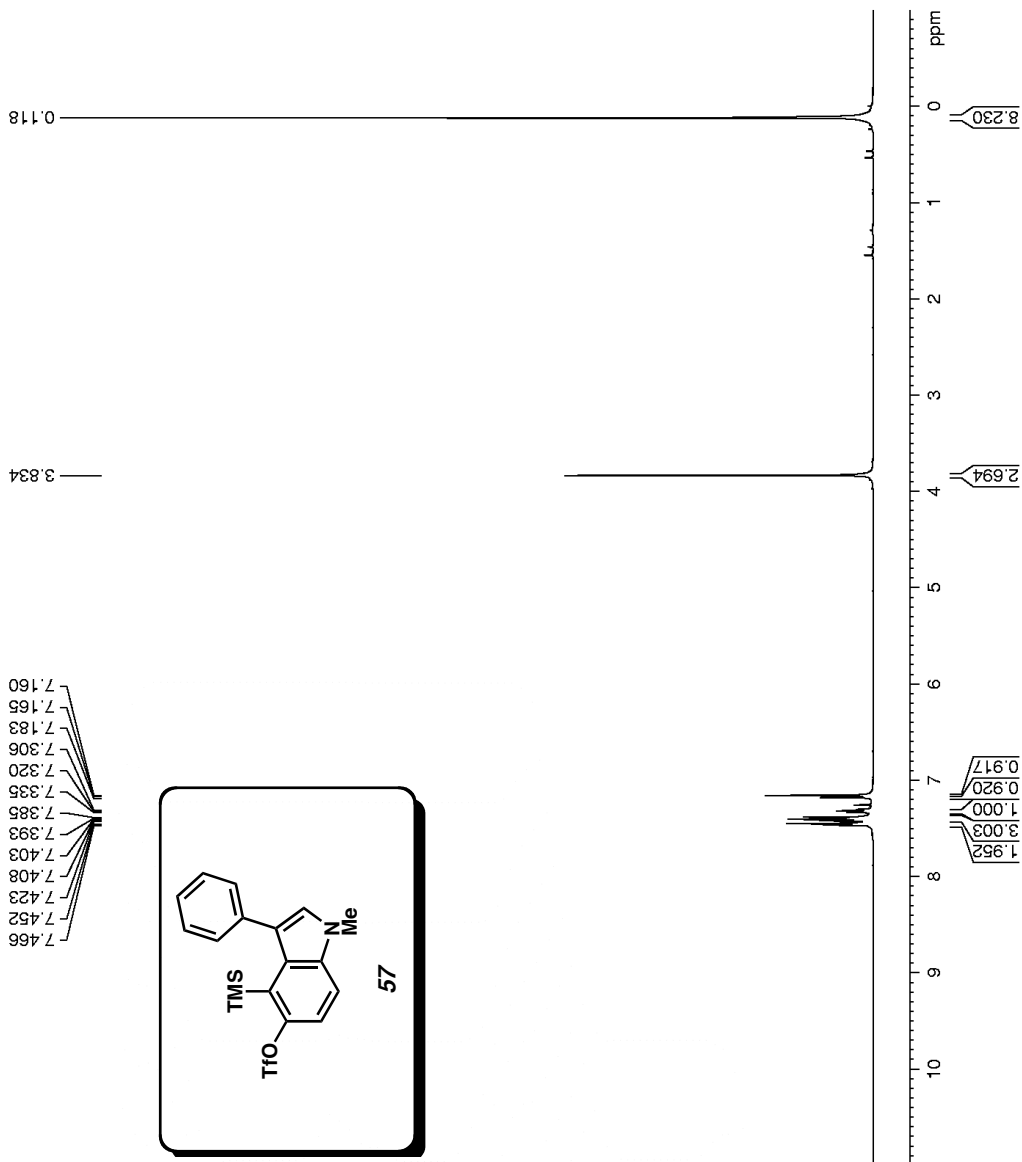

Current Data Parameters  
 NAME GJI-II-275  
 EXPNO 10  
 PROCNO 1

F2 - Acquisition Parameters  
 Date\_ 20090730  
 Time 10.05  
 INSTRUM avance500  
 PROBHD 5 mm bb-Z 2800  
 PULPROG zg30  
 TD 65536  
 SOLVENT CDCl3  
 NS 16  
 DS 0  
 SWH 10000.000 Hz  
 FIDRES 0.152588 Hz  
 AQ 3.2769001 sec  
 RG 128  
 DW 50.000 usec  
 DE 6.00 usec  
 TE 295.8 K  
 D1 2.0000000 sec  
 MCREST 0.0000000 sec  
 MCWRK 0.0150000 sec

===== CHANNEL f1 =====  
 NUC1 1H  
 P1 12.00 usec  
 PL1 0.00 dB  
 SFO1 500.3330020 MHz

F2 - Processing parameters  
 SI 32768  
 SF 500.3300220 MHz  
 WDW EM  
 SSB 0  
 LB 0.30 Hz  
 GB 0  
 PC 1.00

GJI-II-275 pure

7.502  
7.486  
7.485  
7.431  
7.427  
7.417  
7.414  
7.404  
7.401  
7.372  
7.370  
7.359  
7.355  
7.340  
7.260  
7.237  
7.237  
7.236  
7.221  
7.220  
6.989  
6.989  
6.973  
6.968  
6.958  
6.935  
6.929  
6.701  
6.686  
6.430  
6.424  
5.192  
4.051

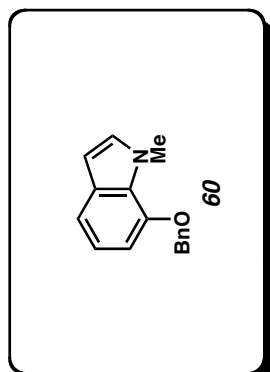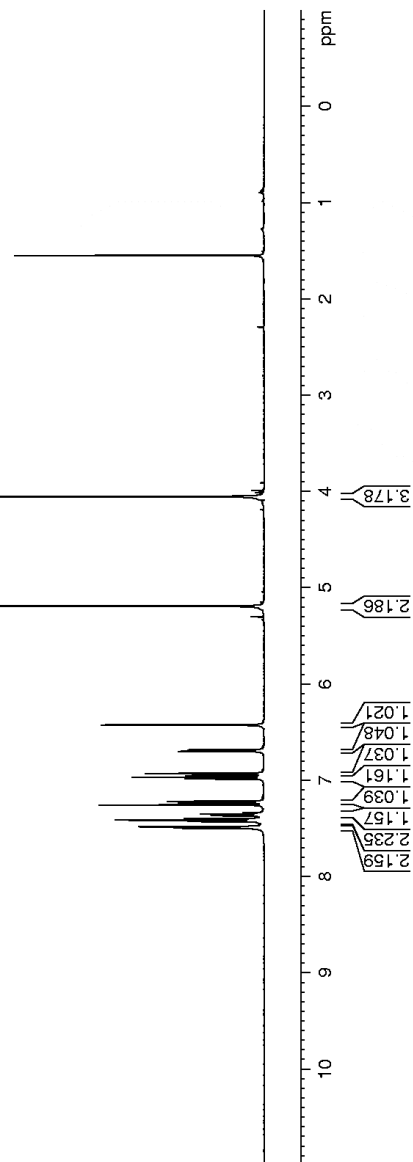

Current Data Parameters  
 NAME GJI-II-274-1  
 EXPNO 10  
 PROCNO 1

F2 - Acquisition Parameters  
 Date\_ 20100422  
 Time 23:29  
 INSTRUM advance500  
 PROBHD 5 mm bb-Z Z800  
 PULPROG zg30  
 TD 65536  
 SOLVENT CDCl3  
 NS 8  
 DS 0  
 SWH 10000.000 Hz  
 FIDRES 0.152588 Hz  
 AQ 3.2769001 sec  
 RG 143.7  
 DW 50.000 usec  
 DE 6.00 usec  
 TE 298.4 K  
 D1 2.0000000 sec  
 MCREST 0.0000000 sec  
 MCWRK 0.01500000 sec

===== CHANNEL f1 =====  
 NUC1 1H  
 P1 12.25 usec  
 PL1 0.00 dB  
 SFO1 500.3330020 MHz

F2 - Processing parameters  
 SI 32768  
 SF 500.3300220 MHz  
 WDW EM  
 SSB 0  
 LB 0.30 Hz  
 GB 0  
 PC 1.00

GJI-II-274 purified

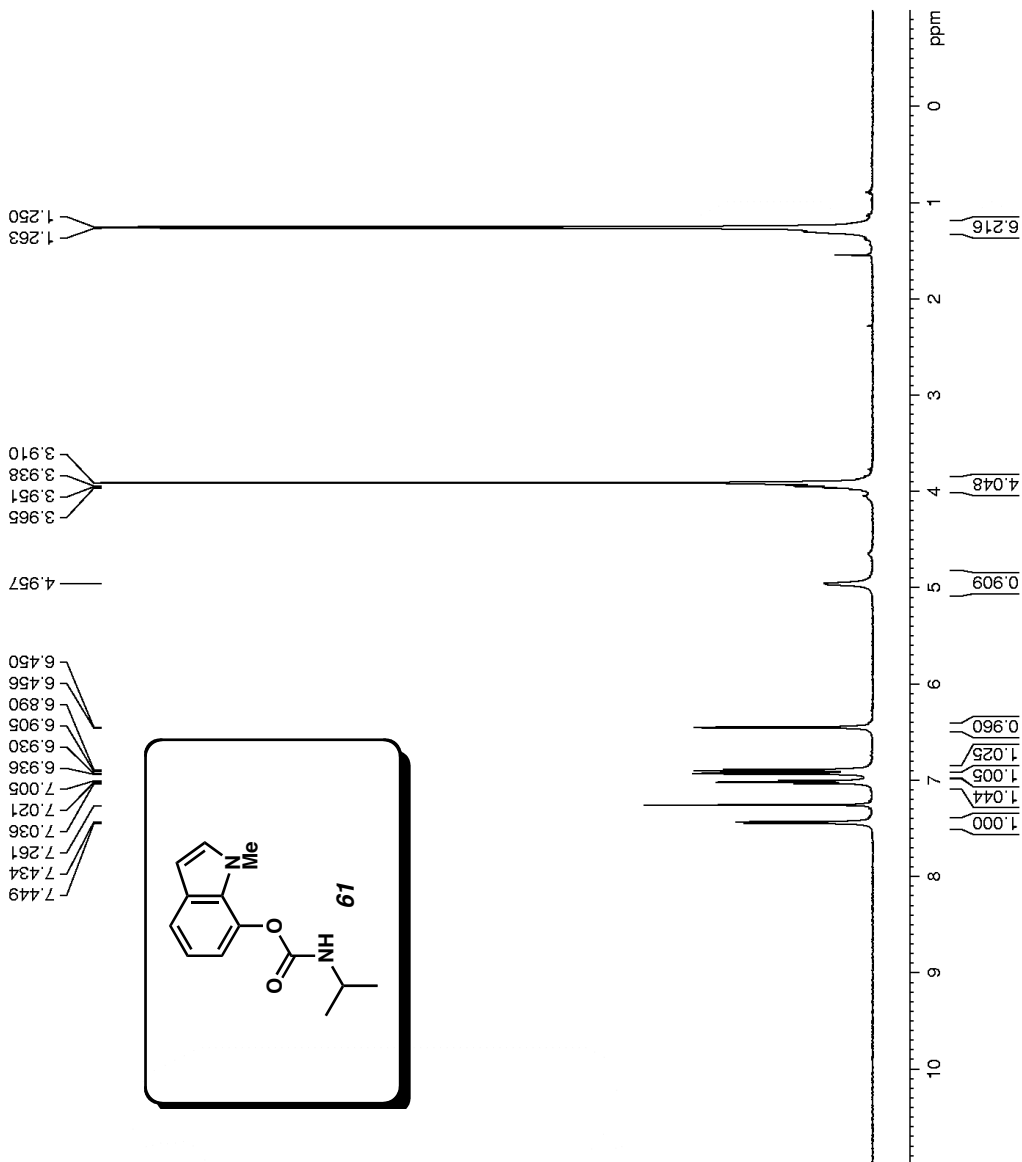

Current Data Parameters  
 NAME smb-3-184pure1  
 EXPNO 2  
 PROCNO 1

F2 - Acquisition Parameters  
 Date\_ 20100429  
 Time 19:25  
 INSTRUM advance500  
 PROBHD 5 mm bb-Z Z800  
 PULPROG zg30  
 TD 65536  
 SOLVENT CDCl3  
 NS 8  
 DS 0  
 SWH 10000.000 Hz  
 FIDRES 0.152588 Hz  
 AQ 3.2769001 sec  
 RG 143.7  
 DW 50.000 usec  
 DE 6.00 usec  
 TE 297.6 K  
 D1 2.00000000 sec  
 MCREST 0.00000000 sec  
 MCWRK 0.01500000 sec

===== CHANNEL f1 =====  
 NUC1 1H  
 P1 12.25 usec  
 PL1 0.00 dB  
 SFO1 500.3330020 MHz

F2 - Processing parameters  
 SI 32768  
 SF 500.3299621 MHz  
 WDW EM  
 SSB 0  
 LB 0.30 Hz  
 GB 0  
 PC 1.00

default proton parameters

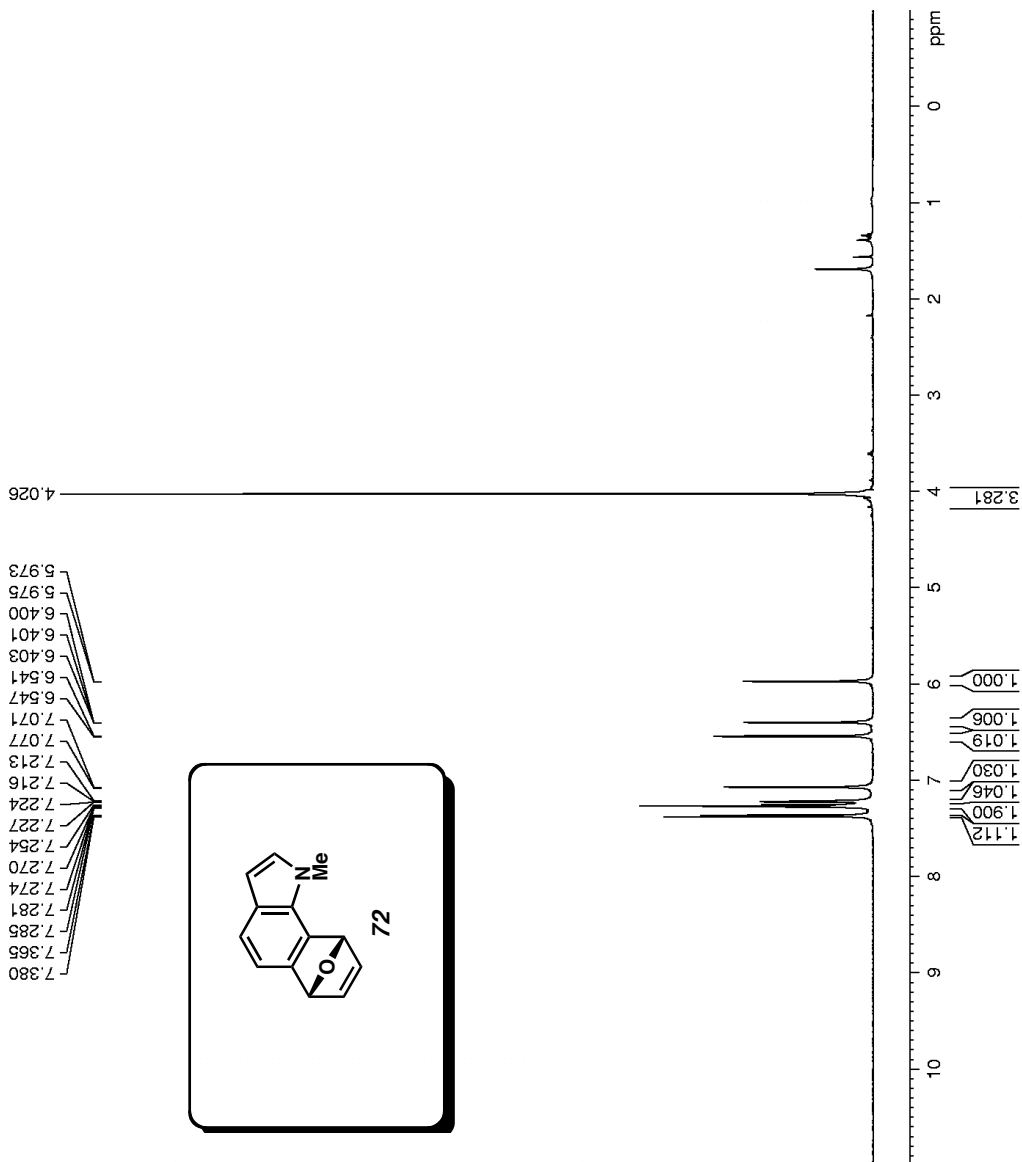



Current Data Parameters  
 NAME smb-3-188f4  
 EXPNO 1  
 PROCNO 1

F2 - Acquisition Parameters  
 Date\_ 20100502  
 Time 19.13  
 INSTRUM arx500  
 PROBHD 5 mm broadband  
 PULPROG zg30  
 TD 65536  
 SOLVENT CDCl3  
 NS 8  
 DS 0  
 SWH 10000.000 Hz  
 FIDRES 0.152588 Hz  
 AQ 3.2768500 sec  
 RG 128  
 DW 50.000 usec  
 DE 71.43 usec  
 TE 300.0 K  
 D1 2.0000000 sec  
 P1 12.20 usec  
 SFO1 500.1330008 MHz  
 NUCLEUS 1H

F2 - Processing parameters  
 SI 32768  
 SF 500.1300186 MHz  
 WDW EM  
 SSB 0  
 LB 0.30 Hz  
 GB 0  
 PC 1.00

Default proton parameters

5.175  
6.625  
6.630  
6.631  
6.631  
6.962  
6.967  
6.980  
6.985  
7.255  
7.260  
7.270  
7.301  
7.308  
7.370  
7.381  
7.385  
7.388  
7.399  
7.442  
7.457  
7.468  
7.473  
7.492  
7.549  
7.564

1.211  
1.226  
1.709  
1.724  
1.739  
1.754  
1.769  
1.784  
1.799

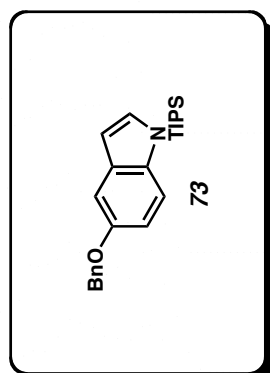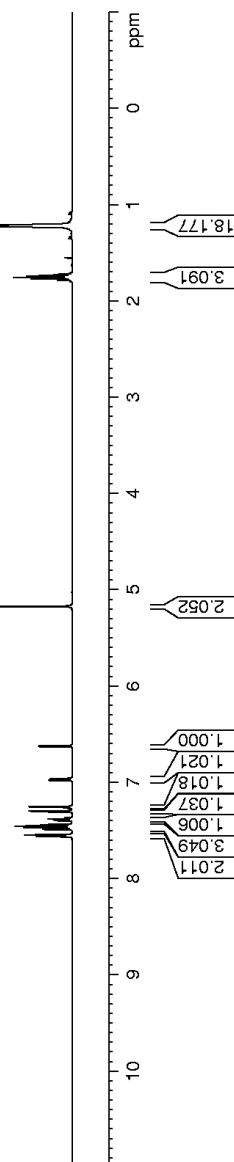

Current Data Parameters  
 NAME Kbb-81-1  
 EXPNO 1  
 PROCNO 1

F2 - Acquisition Parameters  
 Date\_ 20080224  
 Time 17.15  
 INSTRUM avance500  
 PROBHD 5 mm bb-Z Z800  
 PULPROG zg30  
 TD 65536  
 SOLVENT CDCl3  
 NS 8  
 DS 0  
 SWH 10000.000 Hz  
 FIDRES 0.152588 Hz  
 AQ 3.2769001 sec  
 RG 90.5  
 DW 50.000 usec  
 DE 6.00 usec  
 TE 295.5 K  
 D1 2.00000000 sec  
 MCREST 0.00000000 sec  
 MCWRK 0.01500000 sec

===== CHANNEL f1 =====  
 NUC1 1H  
 P1 12.00 usec  
 PL1 0.00 dB  
 SFO1 500.3330020 MHz

F2 - Processing parameters  
 SI 32768  
 SF 500.3300220 MHz  
 WDW EM  
 SSB 0  
 LB 0.30 Hz  
 GB 0  
 PC 1.00

default proton parameters

7.442  
7.424  
7.349  
7.345  
7.253  
6.920  
6.916  
6.902  
6.898  
6.584  
6.577  
4.875  
4.861  
3.930  
3.917  
3.904  
3.890  
1.711  
1.696  
1.681  
1.673  
1.666  
1.651  
1.241  
1.228  
1.143  
1.128

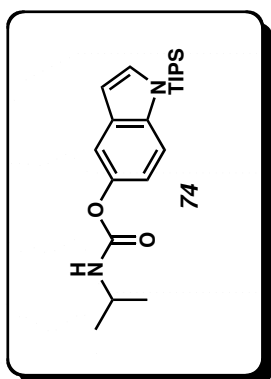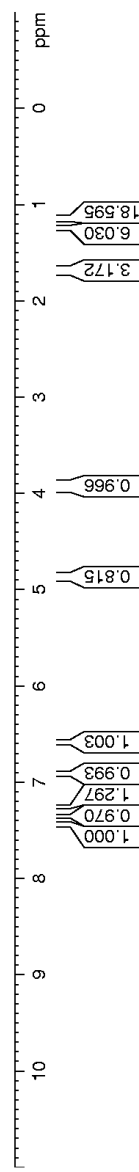

Current Data Parameters  
 NAME kbb-108-1  
 EXPNO 1  
 PROCNO 1

F2 - Acquisition Parameters  
 Date\_ 20080312  
 Time 0:45  
 INSTRUM avance500  
 PROBHD 5 mm bb-Z Z800  
 PULPROG zg30  
 TD 65536  
 SOLVENT CDCl3  
 NS 8  
 DS 0  
 SWH 10000.000 Hz  
 FIDRES 0.152588 Hz  
 AQ 3.2769001 sec  
 RG 32  
 DW 50.000 usec  
 DE 6.00 usec  
 TE 295.7 K  
 D1 2.0000000 sec  
 MCREST 0.0000000 sec  
 MCWRK 0.01500000 sec

===== CHANNEL f1 =====  
 NUC1 1H  
 P1 12.00 usec  
 PL1 0.00 dB  
 SFO1 500.3330020 MHz

F2 - Processing parameters  
 SI 32768  
 SF 500.3300220 MHz  
 WDW EM  
 SSB 0  
 LB 0.30 Hz  
 GB 0  
 PC 1.00

default proton parameters

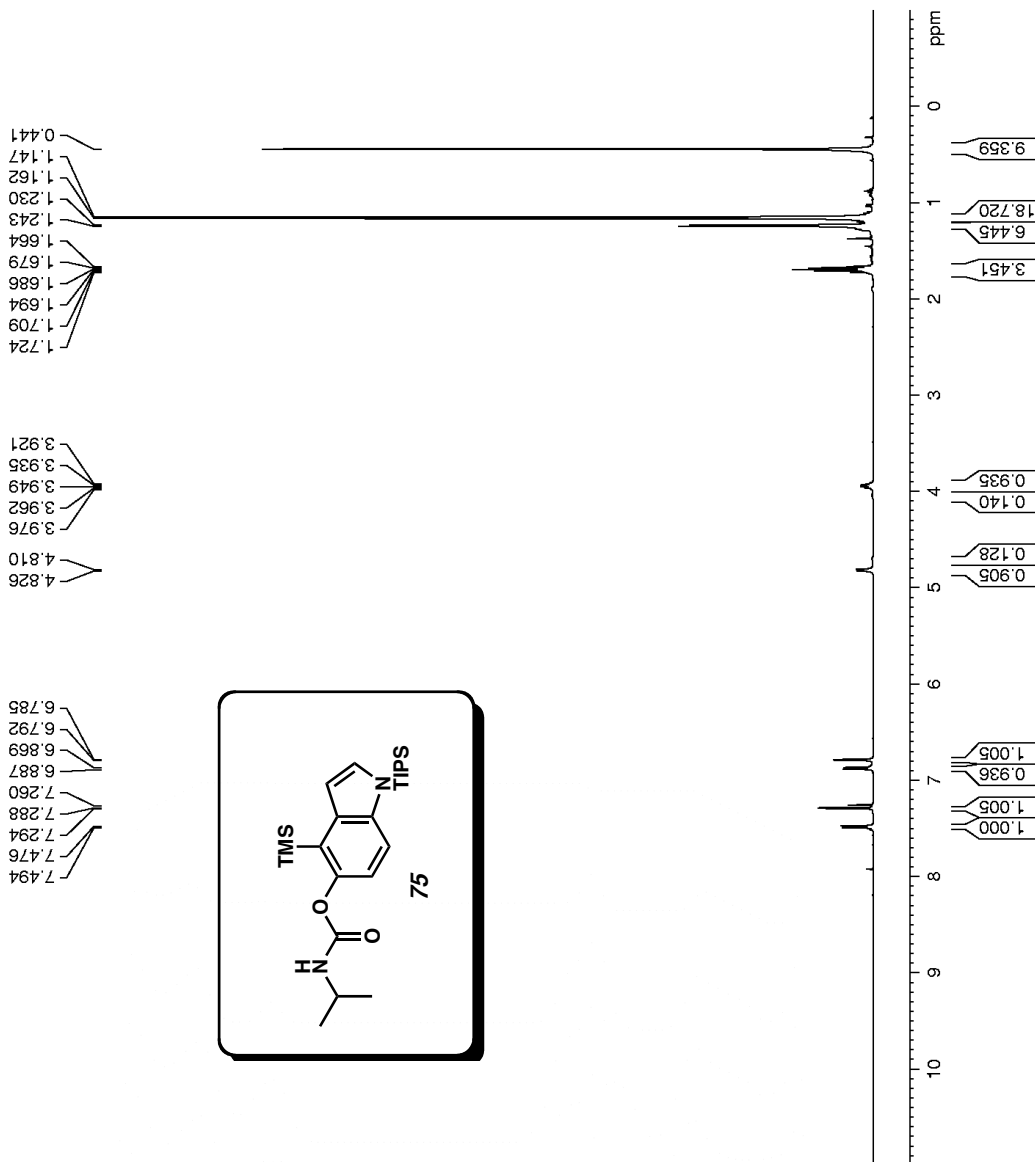

Current Data Parameters  
 NAME smb-2-196check  
 EXPNO 2  
 PROCNO 1

F2 - Acquisition Parameters  
 Date\_ 20100520  
 Time 22:05  
 INSTRUM advance500  
 PROBHD 5 mm bb-Z Z800  
 PULPROG zg30  
 TD 65536  
 SOLVENT CDCl3  
 NS 8  
 DS 0  
 SWH 10000.000 Hz  
 FIDRES 0.152588 Hz  
 AQ 3.2769001 sec  
 RG 57  
 DW 50.000 usec  
 DE 6.00 usec  
 TE 297.6 K  
 D1 2.00000000 sec  
 MCREST 0.00000000 sec  
 MCWRK 0.01500000 sec

===== CHANNEL f1 =====  
 NUC1 1H  
 P1 12.25 usec  
 PL1 0.00 dB  
 SFO1 500.3330020 MHz

F2 - Processing parameters  
 SI 32768  
 SF 500.3300174 MHz  
 WDW EM  
 SSB 0  
 LB 0.30 Hz  
 GB 0  
 PC 1.00

default proton parameters

1.750  
1.735  
1.720  
1.705  
1.690  
1.675  
1.651  
1.173  
1.158  
0.534

7.540  
7.522  
7.384  
7.378  
7.269  
7.133  
7.115  
6.842  
6.836

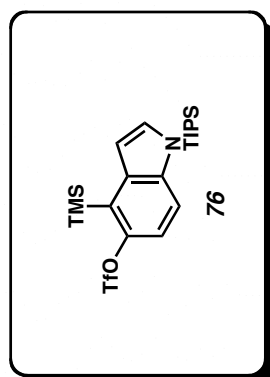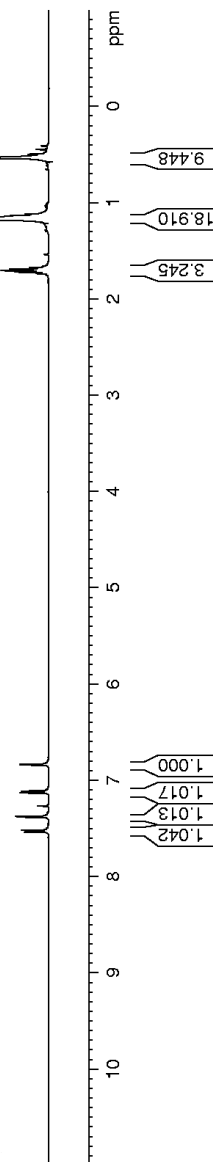

Current Data Parameters  
 NAME GJI-II-144+147  
 EXPNO 20  
 PROCNO 1

F2 - Acquisition Parameters  
 Date\_ 20090924  
 Time\_ 17.07  
 INSTRUM arx500  
 PROBHD 5 mm broadband  
 PULPROG zg30  
 TD 65536  
 SOLVENT CDCl3  
 NS 8  
 DS 0  
 SWH 10000.000 Hz  
 FIDRES 0.152588 Hz  
 AQ 3.2768500 sec  
 RG 180  
 DW 50.000 usec  
 DE 71.43 usec  
 TE 300.0 K  
 D1 2.0000000 sec  
 P1 11.00 usec  
 SFO1 500.1330008 MHz  
 NUCLEUS 1H

F2 - Processing parameters  
 SI 32768  
 SF 500.1300238 MHz  
 WDW EM  
 SSB 0  
 LB 0.30 Hz  
 GB 0  
 PC 1.00

GJI-II-144 + 147 1H

8.331  
7.360  
7.358  
7.342  
7.340  
7.305  
7.300  
7.294  
7.167  
7.149  
6.784  
6.782  
6.779  
6.777  
6.775  
6.773  
6.771

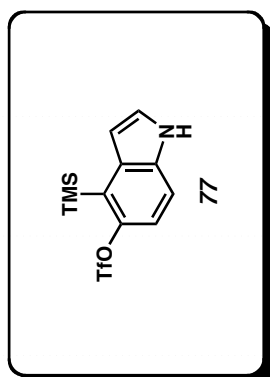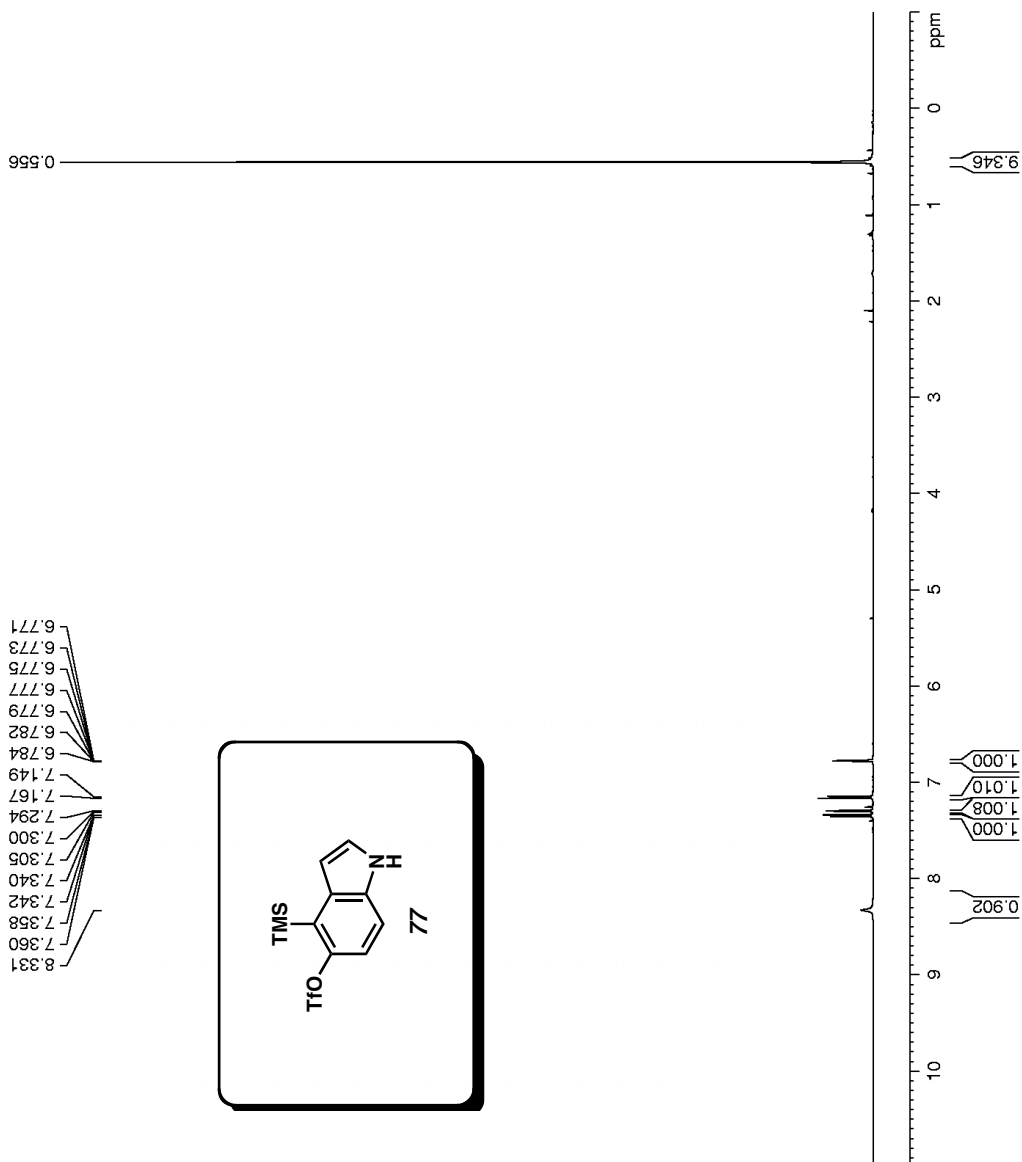





Current Data Parameters  
 NAME smb-2-106pure  
 EXPNO 1  
 PROCNO 1

F2 - Acquisition Parameters  
 Date\_ 20090125  
 Time 22:00  
 INSTRUM arx500  
 PROBHD 5 mm broadband  
 PULPROG zg30  
 TD 65536  
 SOLVENT CDCI3  
 NS 8  
 DS 0  
 SWH 10000.000 Hz  
 FIDRES 0.152588 Hz  
 AQ 3.2768500 sec  
 RG 4096  
 DW 50.000 usec  
 DE 71.43 usec  
 TE 300.0 K  
 D1 2.0000000 sec  
 P1 11.00 usec  
 SFO1 500.1330008 MHz  
 NUCLEUS 1H

F2 - Processing parameters  
 SI 32768  
 SF 500.1300190 MHz  
 WDW EM  
 SSB 0  
 LB 0.30 Hz  
 GB 0  
 PC 1.00

Default proton parameters

5.132  
 6.535  
 6.542  
 6.878  
 6.882  
 6.895  
 6.899  
 6.999  
 7.003  
 7.124  
 7.131  
 7.297  
 7.312  
 7.326  
 7.364  
 7.380  
 7.394  
 7.451  
 7.465  
 7.489  
 7.506

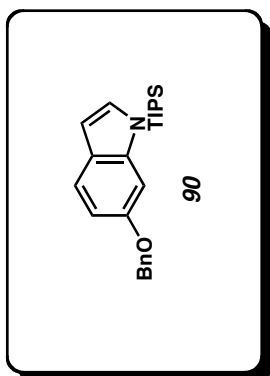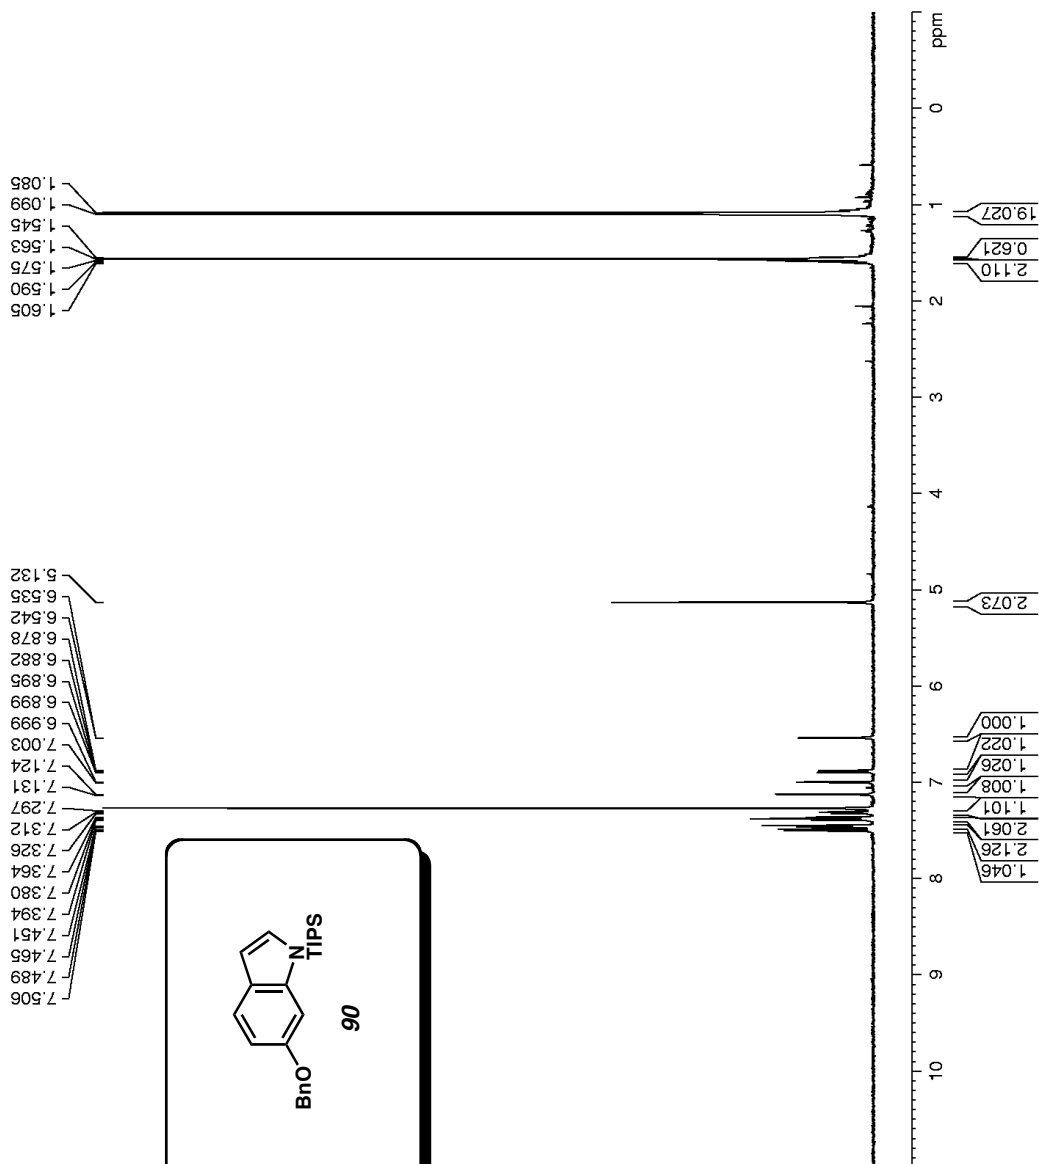



Current Data Parameters  
 NAME smb-2-107-pure  
 EXPNO 1  
 PROCNO 1

F2 - Acquisition Parameters  
 Date\_ 20090124  
 Time 15:21  
 INSTRUM arx500  
 PROBHD 5 mm broadband  
 PULPROG zg30  
 TD 65536  
 SOLVENT CDCl3  
 NS 8  
 DS 0  
 SWH 10000.000 Hz  
 FIDRES 0.152588 Hz  
 AQ 3.2768500 sec  
 RG 1024  
 DW 50.000 usec  
 DE 71.43 usec  
 TE 300.0 K  
 D1 2.0000000 sec  
 P1 11.00 usec  
 SFO1 500.1330008 MHz  
 NUCLEUS 1H

F2 - Processing parameters  
 SI 32768  
 SF 500.1300188 MHz  
 WDW EM  
 SSB 0  
 LB 0.30 Hz  
 GB 0  
 PC 1.00

Default proton parameters

1.729  
1.713  
1.698  
1.683  
1.668  
1.653  
1.638  
1.249  
1.236  
1.160  
1.145

3.914  
3.927  
3.941  
3.954  
4.810  
4.822

6.598  
6.603  
6.604  
6.902  
6.906  
6.918  
6.923  
7.236  
7.243  
7.270  
7.548  
7.565

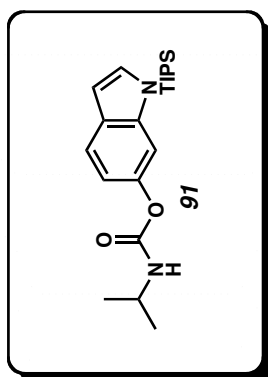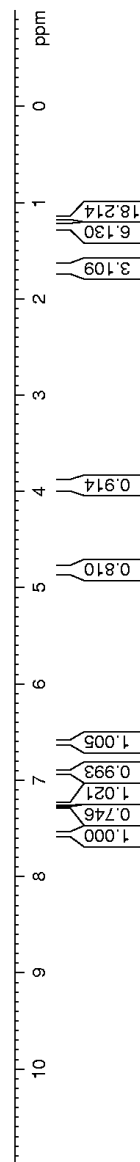

Current Data Parameters  
 NAME smb-2-112pure  
 EXPNO 2  
 PROCNO 1

F2 - Acquisition Parameters  
 Date\_ 20090127  
 Time 14.43  
 INSTRUM avance500  
 PROBHD 5 mm bb-Z Z800  
 PULPROG zg30  
 TD 65536  
 SOLVENT CDCl3  
 NS 8  
 DS 0  
 SWH 10000.000 Hz  
 FIDRES 0.152588 Hz  
 AQ 3.2769001 sec  
 RG 181  
 DW 50.000 usec  
 DE 6.00 usec  
 TE 294.3 K  
 D1 2.0000000 sec  
 MCREST 0.0000000 sec  
 MCWRK 0.01500000 sec

===== CHANNEL f1 =====  
 NUC1 1H  
 P1 12.00 usec  
 PL1 0.00 dB  
 SFO1 500.3330020 MHz

F2 - Processing parameters  
 SI 32768  
 SF 500.3300171 MHz  
 WDW EM  
 SSB 0  
 LB 0.30 Hz  
 GB 0  
 PC 1.00

default proton parameters

7.688  
7.270  
7.254  
7.231  
7.224  
6.609  
6.608  
6.603  
6.602  
4.708  
4.692  
3.993  
3.980  
3.967  
3.952  
3.938  
3.925  
1.720  
1.705  
1.690  
1.678  
1.660  
1.645  
1.630  
1.588  
1.568  
1.245  
1.232  
1.160  
1.144  
0.319

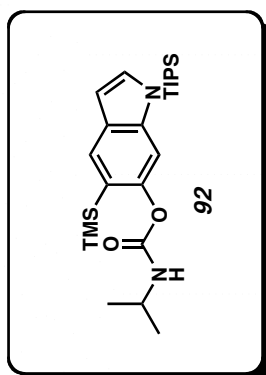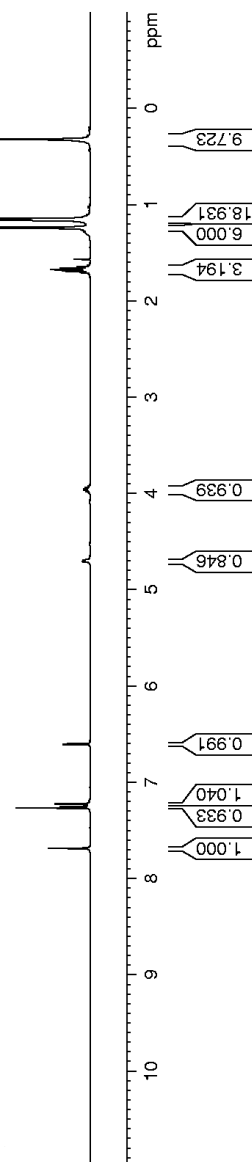

Current Data Parameters  
 NAME smb-2-113pure  
 EXPNO 2  
 PROCNO 1

F2 - Acquisition Parameters  
 Date\_ 20090128  
 Time 19:25  
 INSTRUM avance500  
 PROBHD 5 mm bb-Z Z800  
 PULPROG zg30  
 TD 65536  
 SOLVENT CDCl3  
 NS 16  
 DS 0  
 SWH 10000.000 Hz  
 FIDRES 0.152588 Hz  
 AQ 3.2769001 sec  
 RG 203.2  
 DW 50.000 usec  
 DE 6.00 usec  
 TE 294.0 K  
 D1 2.0000000 sec  
 MCREST 0.0000000 sec  
 MCWRK 0.01500000 sec

===== CHANNEL f1 =====  
 NUC1 1H  
 P1 12.00 usec  
 PL1 0.00 dB  
 SFO1 500.3330020 MHz

F2 - Processing parameters  
 SI 32768  
 SF 500.3300169 MHz  
 WDW EM  
 SSB 0  
 LB 0.30 Hz  
 GB 0  
 PC 1.00

default proton parameters

0.390  
 0.403  
 1.131  
 1.142  
 1.157  
 1.264  
 1.553  
 1.623  
 1.639  
 1.654  
 1.669  
 1.684  
 1.699  
 1.714

6.650  
 6.656  
 7.270  
 7.311  
 7.317  
 7.566  
 7.743

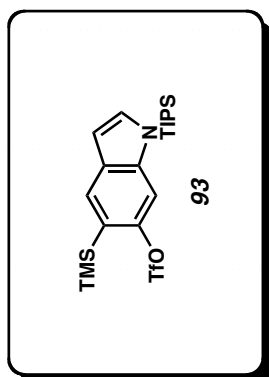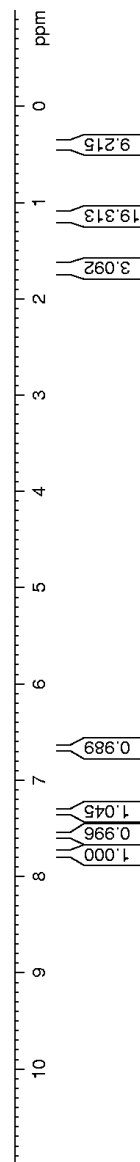

Current Data Parameters  
 NAME GJI-II-184  
 EXPNO 10  
 PROCNO 1

F2 - Acquisition Parameters  
 Date\_ 20090225  
 Time 17.34  
 INSTRUM arx500  
 PROBHD 5 mm broadband  
 PULPROG zg30  
 TD 65536  
 SOLVENT CDCl3  
 NS 8  
 DS 0  
 SWH 10000.000 Hz  
 FIDRES 0.152588 Hz  
 AQ 3.2768500 sec  
 RG 256  
 DW 50.000 usec  
 DE 71.43 usec  
 TE 300.0 K  
 D1 2.0000000 sec  
 P1 11.00 usec  
 SFO1 500.1330008 MHz  
 NUCLEUS 1H

F2 - Processing parameters  
 SI 32768  
 SF 500.1300235 MHz  
 WDW EM  
 SSB 0  
 LB 0.30 Hz  
 GB 0  
 PC 1.00

GJI-II-184 1H

8.277  
 7.801  
 7.445  
 7.247  
 7.242  
 7.240  
 7.236  
 6.594  
 6.593  
 6.591  
 6.589  
 6.587  
 6.584

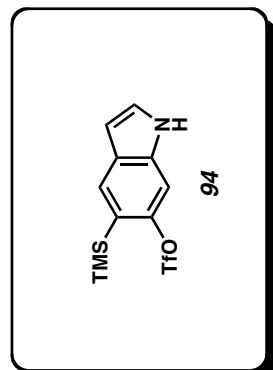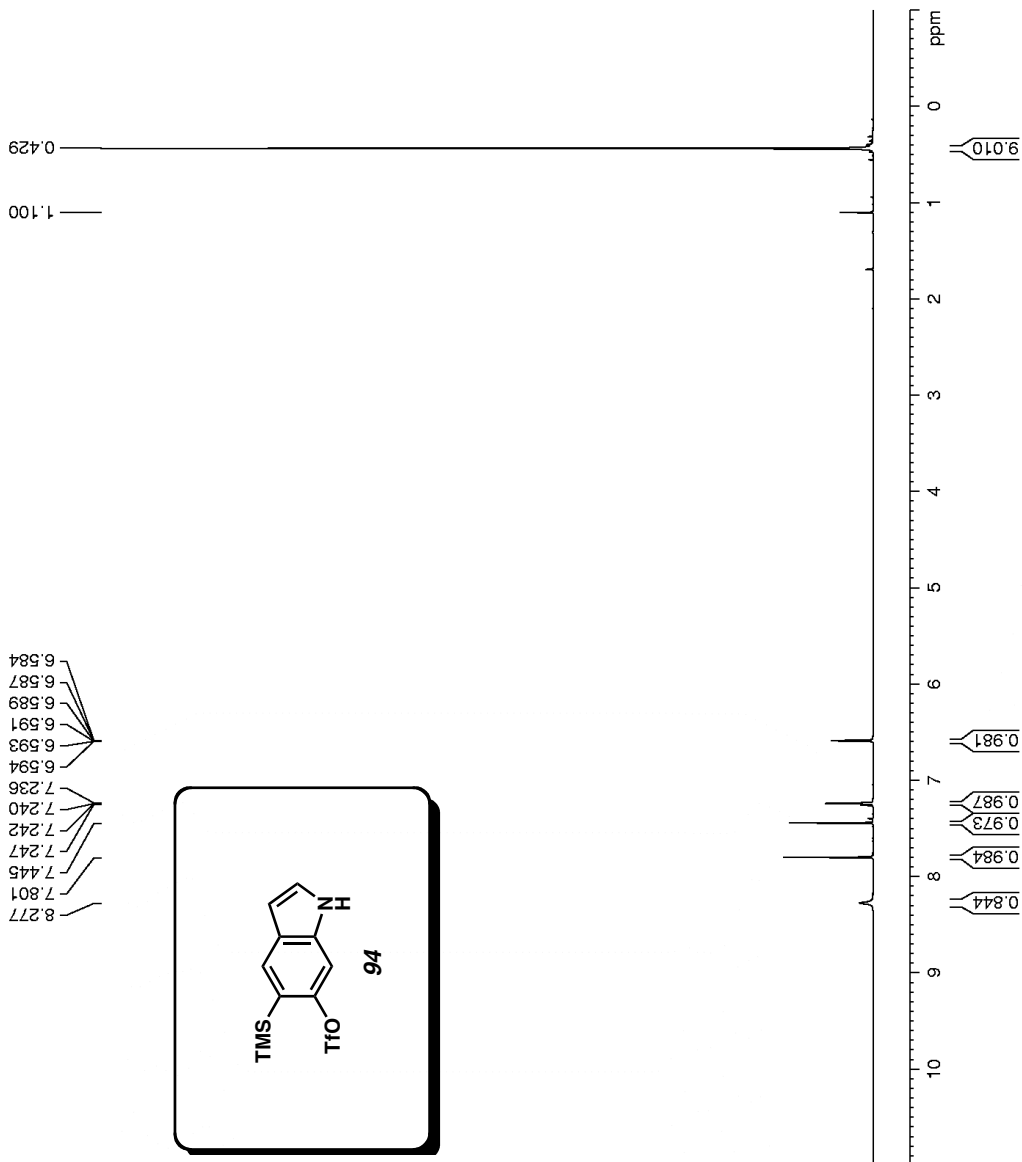

Current Data Parameters  
 NAME GJ-II-194C13  
 EXPNO 12  
 PROCNO 1

F2 - Acquisition Parameters  
 Date\_ 20100402  
 Time 20.16  
 INSTRUM avance500  
 PROBHD 5 mm bb-Z Z800  
 PULPROG zg30  
 TD 65536  
 SOLVENT CDCl3  
 NS 16  
 DS 0  
 SWH 10000.000 Hz  
 FIDRES 0.152588 Hz  
 AQ 3.2769001 sec  
 RG 90.5  
 DW 50.000 usec  
 DE 6.00 usec  
 TE 313.0 K  
 D1 2.0000000 sec  
 MCREST 0.0000000 sec  
 MCWRK 0.0150000 sec

===== CHANNEL f1 =====  
 NUC1 1H  
 P1 12.25 usec  
 PL1 0.00 dB  
 SFO1 500.3330020 MHz

F2 - Processing parameters  
 SI 32768  
 SF 500.3300220 MHz  
 WDW EM  
 SSB 0  
 LB 0.30 Hz  
 GB 0  
 PC 1.00

GJ-II-194 purified 40 deg :

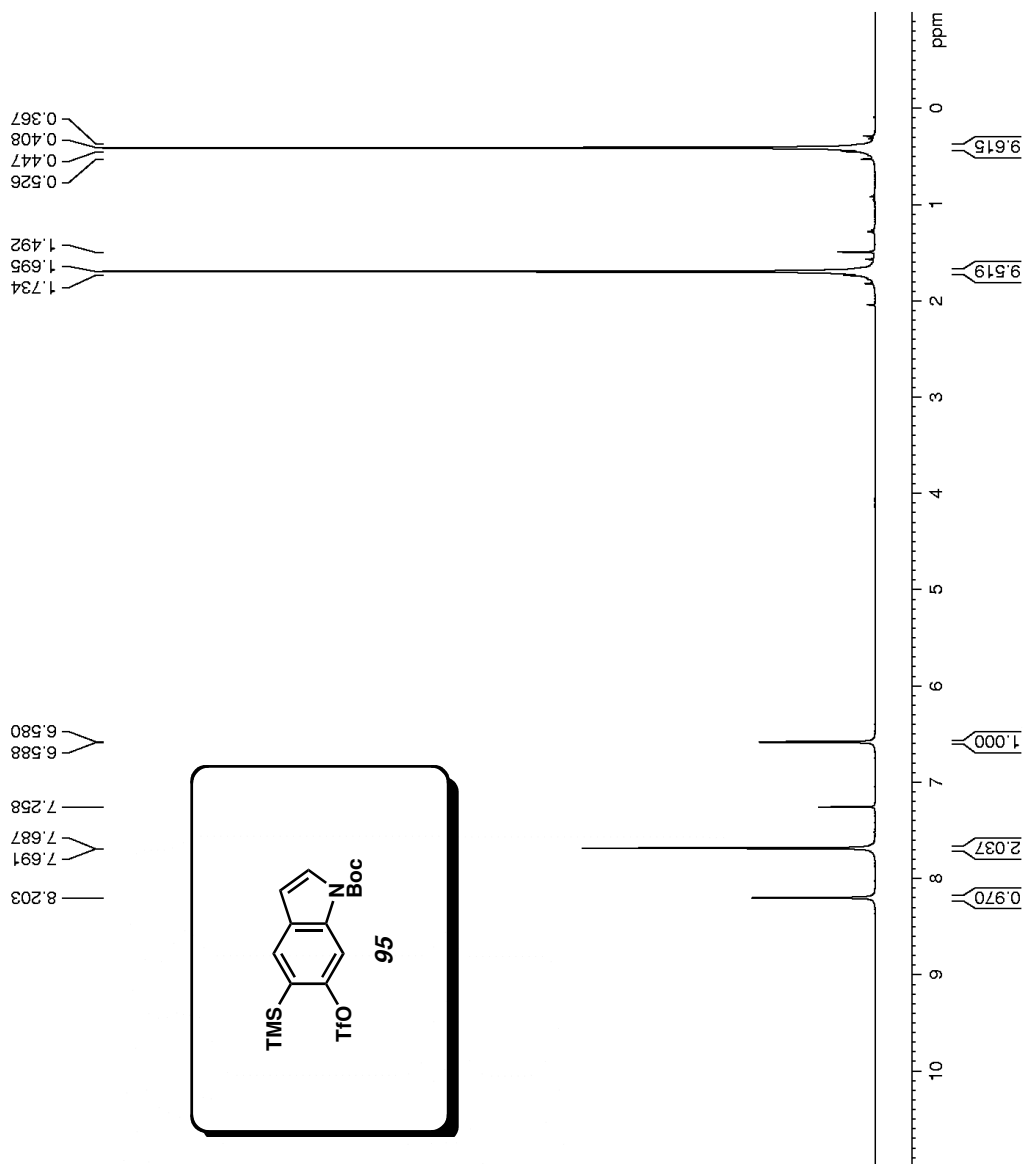

GJI-III-265 Batch I 40 deg

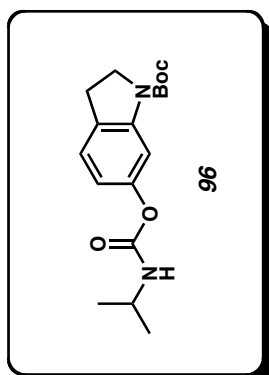

Current Data Parameters  
 NAME GJI-III-265VT  
 EXPNO 30  
 PROCNO 1

F2 - Acquisition Parameters  
 Date\_ 20091223  
 Time\_ 2.01  
 INSTRUM avance500  
 PROBHD 5 mm bb-Z Z800  
 PULPROG zg30  
 TD 65536  
 SOLVENT CDCl3  
 NS 16  
 DS 0  
 SWH 10000.000 Hz  
 FIDRES 0.152588 Hz  
 AQ 3.2769001 sec  
 RG 80.6  
 DW 50.000 usec  
 DE 6.00 usec  
 TE 313.7 K  
 D1 2.00000000 sec  
 MCREST 0.00000000 sec  
 MCWRK 0.01500000 sec

===== CHANNEL f1 =====  
 NUC1 1H  
 P1 12.00 usec  
 PL1 0.00 dB  
 SFO1 500.3330020 MHz

F2 - Processing parameters  
 SI 32768  
 SF 500.3300220 MHz  
 WDW EM  
 SSB 0  
 LB 0.30 Hz  
 GB 0  
 PC 1.00

1.55  
 1.223  
 1.212

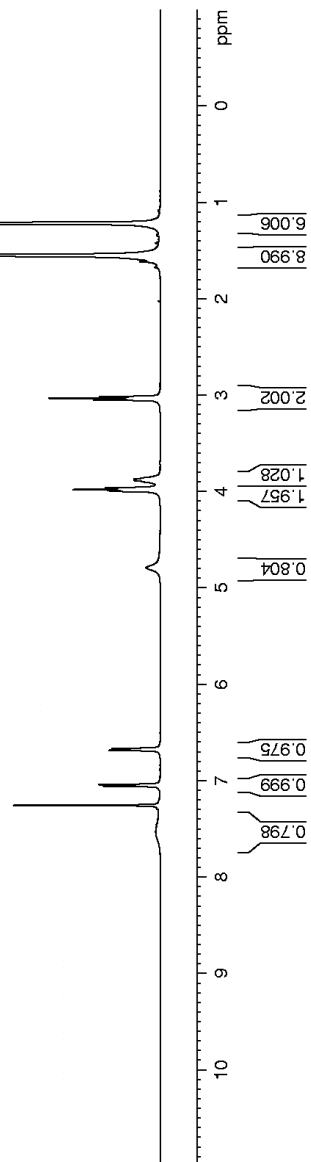

Current Data Parameters  
 NAME GJI-III-17VT  
 EXPNO 20  
 PROCNO 1

F2 – Acquisition Parameters  
 Date\_ 20091226  
 Time\_ 3.03  
 INSTRUM avance500  
 PROBHD 5 mm bb-Z Z800  
 PULPROG zg30  
 TD 65536  
 SOLVENT CDCI3  
 NS 8  
 DS 0  
 SWH 10000.000 Hz  
 FIDRES 0.152588 Hz  
 AQ 3.2769001 sec  
 RG 80.6  
 DW 50.000 usec  
 DE 6.00 usec  
 TE 313.3 K  
 D1 2.00000000 sec  
 MCREST 0.00000000 sec  
 MCWRK 0.01500000 sec

===== CHANNEL f1 =====  
 NUC1 1H  
 P1 12.00 usec  
 PL1 0.00 dB  
 SFO1 500.3330020 MHz

F2 – Processing parameters  
 SI 32768  
 SF 500.3300220 MHz  
 WDW EM  
 SSB 0  
 LB 0.30 Hz  
 GB 0  
 PC 1.00

GJI-III-17 sp2 pTLC 40 deg

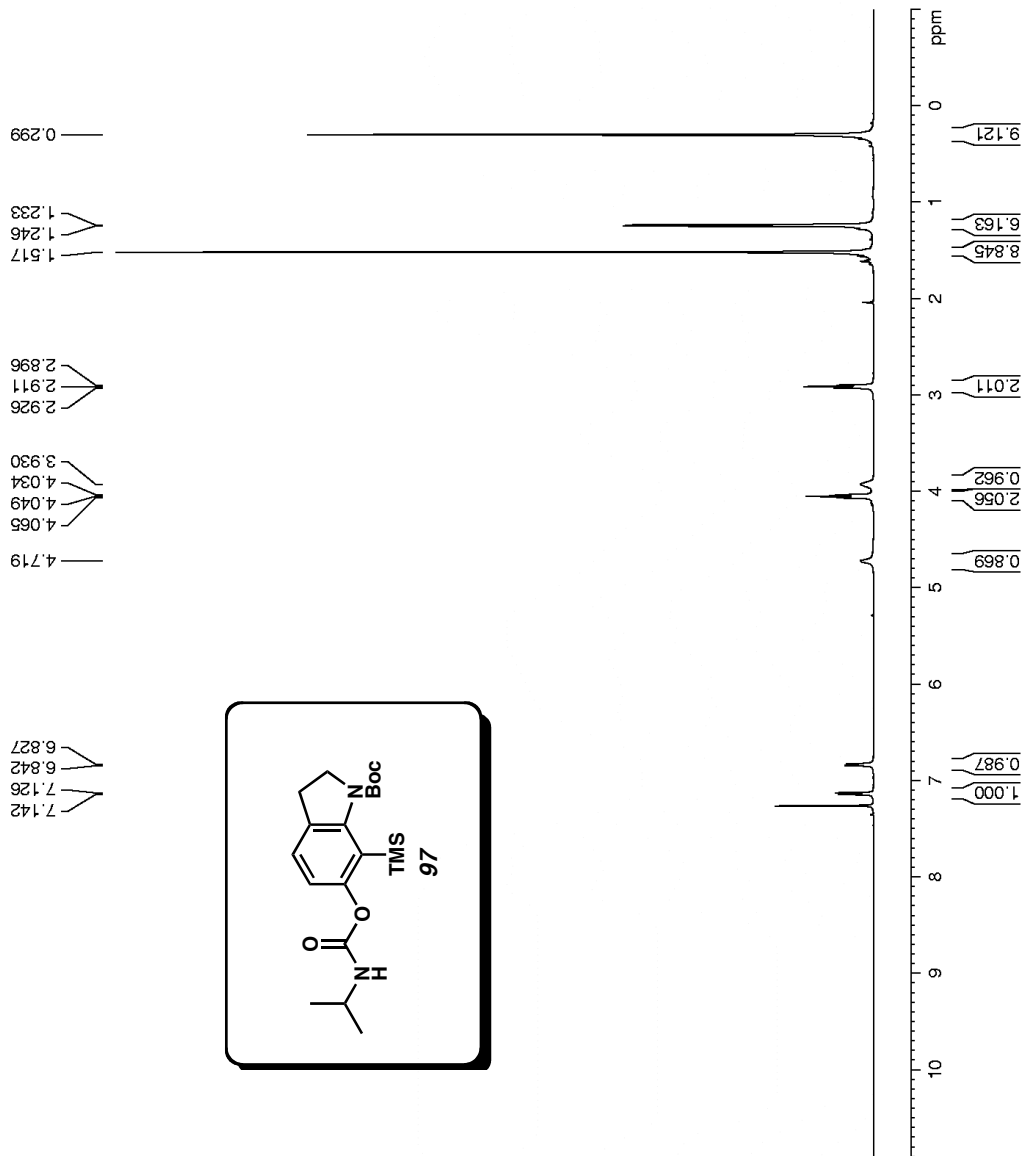

Current Data Parameters  
 NAME GJI-III-19  
 EXPNO 10  
 PROCNO 1

F2 - Acquisition Parameters  
 Date\_ 20090925  
 Time 18:45  
 INSTRUM aix500  
 PROBHD 5 mm broadband  
 PULPROG zg30  
 TD 65536  
 SOLVENT CDCl3  
 NS 16  
 DS 0  
 SWH 10000.000 Hz  
 FIDRES 0.152588 Hz  
 AQ 3.2768500 sec  
 RG 360  
 DW 50.000 usec  
 DE 71.43 usec  
 TE 300.0 K  
 D1 2.00000000 sec  
 P1 11.00 usec  
 SFO1 500.1330008 MHz  
 NUCLEUS 1H

F2 - Processing parameters  
 SI 32768  
 SF 500.1300235 MHz  
 WDW EM  
 SSB 0  
 LB 0.30 Hz  
 GB 0  
 PC 1.00

GJI-III-19 elu 12-15

7.503  
7.486  
7.435  
7.427  
7.260  
7.058  
7.041  
6.510  
6.502  
4.840  
4.824  
4.134  
4.120  
3.968  
3.955  
3.941  
3.926  
2.049  
1.655  
1.601  
1.277  
1.257  
1.244  
0.361

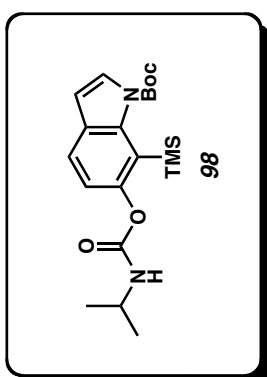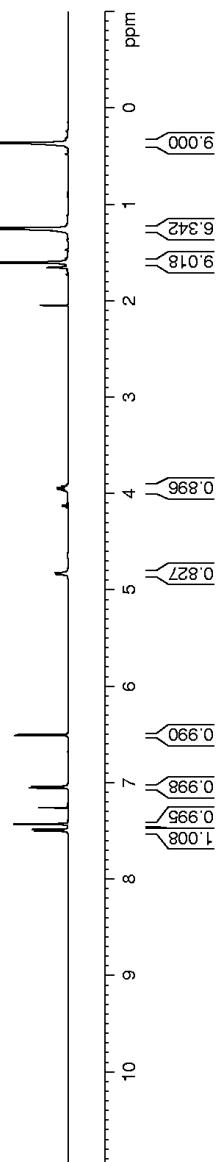



GJI-III-87 purified

7.566  
7.549  
7.542  
7.260  
7.180  
7.163  
6.561  
6.554

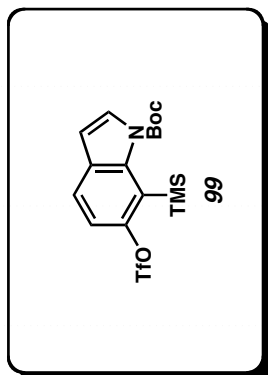

Current Data Parameters  
 NAME GJI-III-87  
 EXPNO 30  
 PROCNO 1

F2 - Acquisition Parameters  
 Date\_ 20091219  
 Time 2.03  
 INSTRUM avance500  
 PROBHD 5 mm bb-Z Z800  
 PULPROG zg30  
 TD 66536  
 SOLVENT CDCl3  
 NS 8  
 DS 0  
 SWH 10000.000 Hz  
 FIDRES 0.152588 Hz  
 AQ 3.2769001 sec  
 RG 128  
 DW 50.000 usec  
 DE 6.00 usec  
 TE 293.7 K  
 D1 2.00000000 sec  
 MCREST 0.00000000 sec  
 MCWRK 0.01500000 sec

===== CHANNEL f1 =====  
 NUC1 1H  
 P1 12.25 usec  
 PL1 0.00 dB  
 SFO1 500.3330020 MHz

F2 - Processing parameters  
 SI 32768  
 SF 500.3300220 MHz  
 WDW EM  
 SSB 0  
 LB 0.30 Hz  
 GB 0  
 PC 1.00

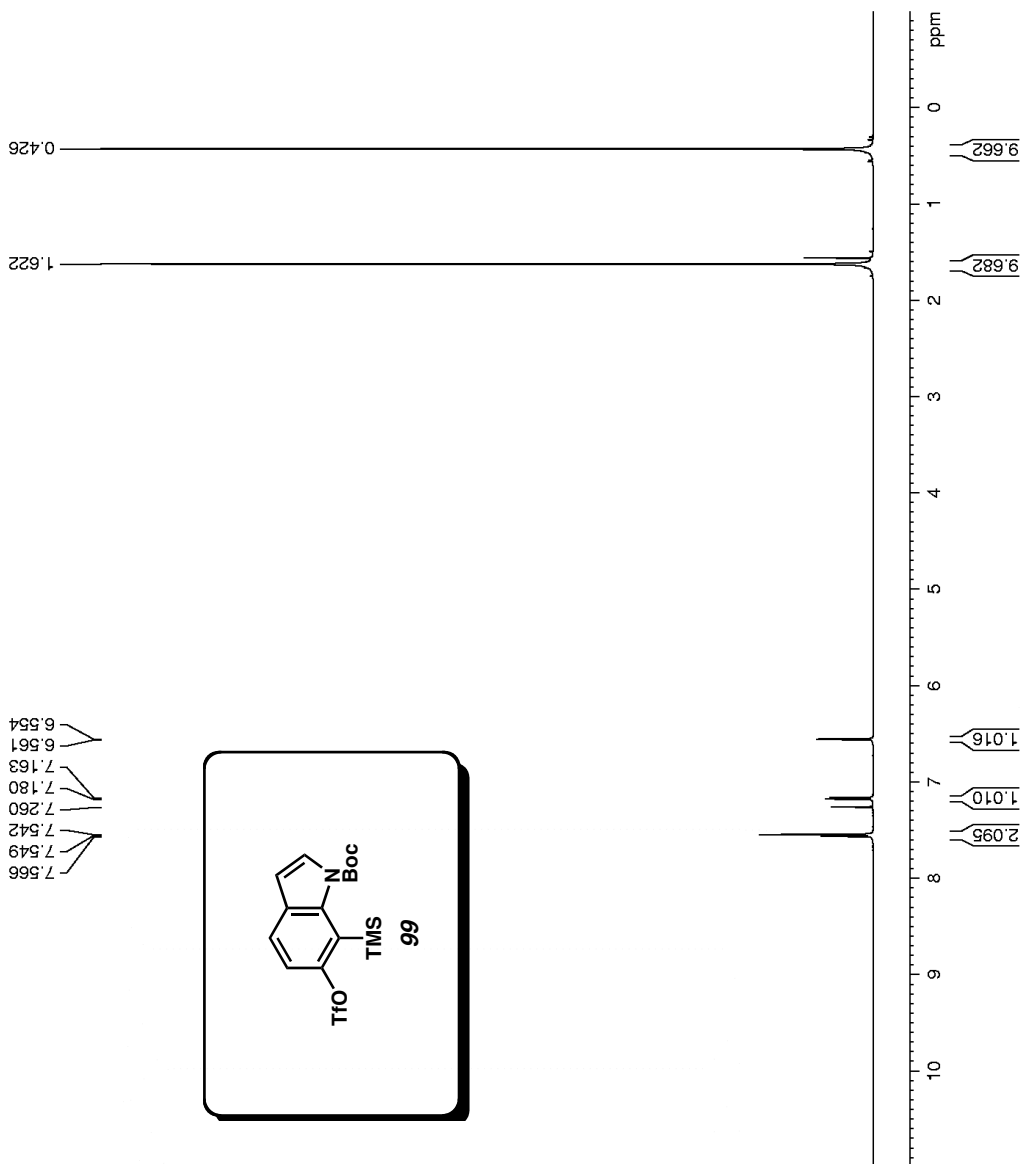

GJI-III-100 purified conc

8.523  
7.705  
7.687  
7.319  
7.314  
7.308  
7.260  
7.174  
7.157  
6.617  
6.613  
6.610  
6.606

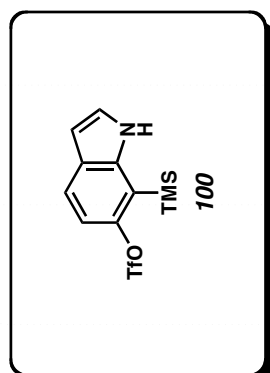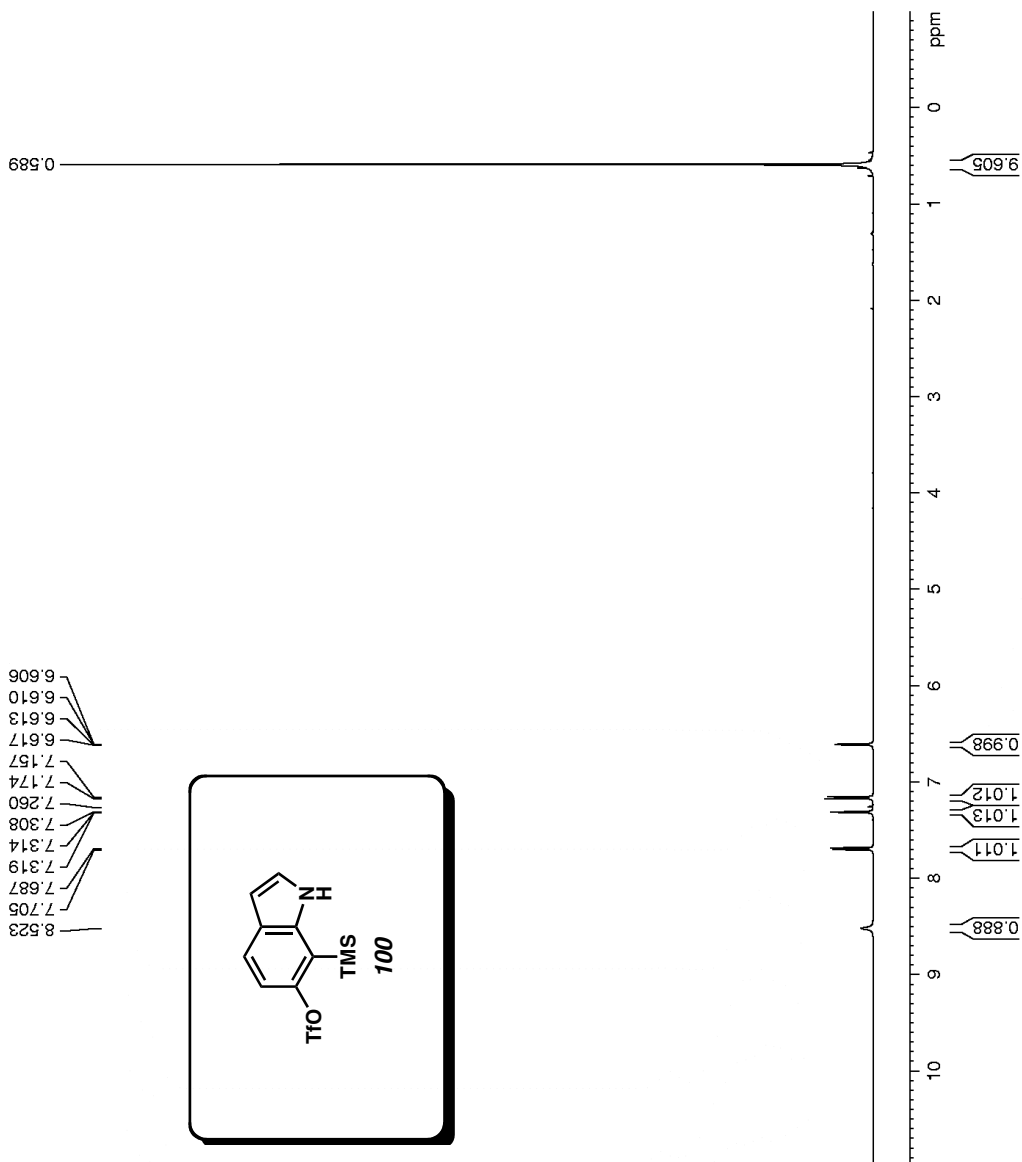

Current Data Parameters  
NAME GJI-III-100  
EXPNO 20  
PROCNO 1

F2 - Acquisition Parameters  
Date\_ 20091215  
Time 3.16  
INSTRUM avance500  
PROBHD 5 mm bb-Z Z800  
PULPROG zg30  
TD 66536  
SOLVENT CDCl3  
NS 8  
DS 0  
SWH 10000.000 Hz  
FIDRES 0.152588 Hz  
AQ 3.2769001 sec  
RG 64  
DW 50.000 usec  
DE 6.00 usec  
TE 293.8 K  
D1 2.00000000 sec  
MCREST 0.00000000 sec  
MCWRK 0.01500000 sec

===== CHANNEL f1 =====  
NUC1 1H  
P1 12.25 usec  
PL1 0.00 dB  
SFO1 500.3330020 MHz

F2 - Processing parameters  
SI 32768  
SF 500.3300220 MHz  
WDW EM  
SSB 0  
LB 0.30 Hz  
GB 0  
PC 1.00

Current Data Parameters  
 NAME GJI-III-132  
 EXPNO 10  
 PROCNO 1

F2 - Acquisition Parameters  
 Date\_ 20100313  
 Time 2:15  
 INSTRUM avance500  
 PROBHD 5 mm bb-Z Z800  
 PULPROG zg30  
 TD 66536  
 SOLVENT CDCl3  
 NS 8  
 DS 0  
 SWH 10000.000 Hz  
 FIDRES 0.152588 Hz  
 AQ 3.2769001 sec  
 RG 64  
 DW 50.000 usec  
 DE 6.00 usec  
 TE 295.7 K  
 D1 2.00000000 sec  
 MCREST 0.00000000 sec  
 MCWRK 0.01500000 sec

===== CHANNEL f1 =====  
 NUC1 1H  
 P1 12.25 usec  
 PL1 0.00 dB  
 SFO1 500.3330020 MHz

F2 - Processing parameters  
 SI 32768  
 SF 500.3300220 MHz  
 WDW EM  
 SSB 0  
 LB 0.30 Hz  
 GB 0  
 PC 1.00

GJI-III-132 purified

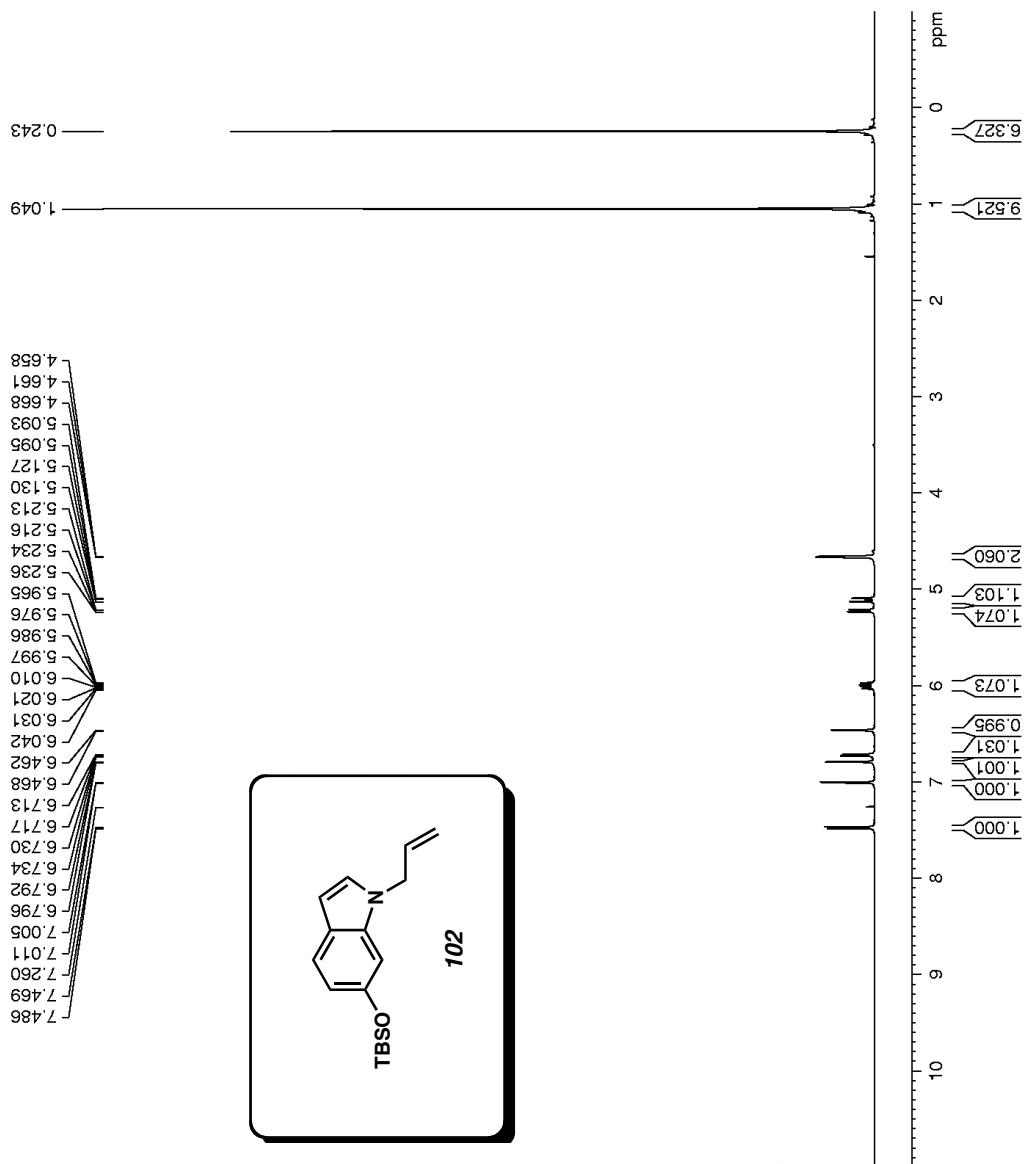

GJI-III-128 purified

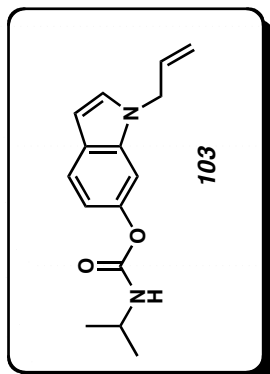

Current Data Parameters  
 NAME GJI-III-128  
 EXPNO 10  
 PROCNO 1

F2 - Acquisition Parameters  
 Date\_ 20100317  
 Time\_ 2:57  
 INSTRUM avance500  
 PROBHD 5 mm bb-Z Z800  
 PULPROG zg30  
 TD 68536  
 SOLVENT CDCl3  
 NS 8  
 DS 0  
 SWH 10000.000 Hz  
 FIDRES 0.152588 Hz  
 AQ 3.2769001 sec  
 RG 114  
 DW 50.000 usec  
 DE 6.00 usec  
 TE 296.0 K  
 D1 2.00000000 sec  
 MCREST 0.00000000 sec  
 MCWRK 0.01500000 sec

===== CHANNEL f1 =====  
 NUC1 1H  
 P1 12.25 usec  
 PL1 0.00 dB  
 SFO1 500.3330020 MHz

F2 - Processing parameters  
 SI 32768  
 SF 500.3300220 MHz  
 WDW EM  
 SSB 0  
 LB 0.30 Hz  
 GB 0  
 PC 1.00

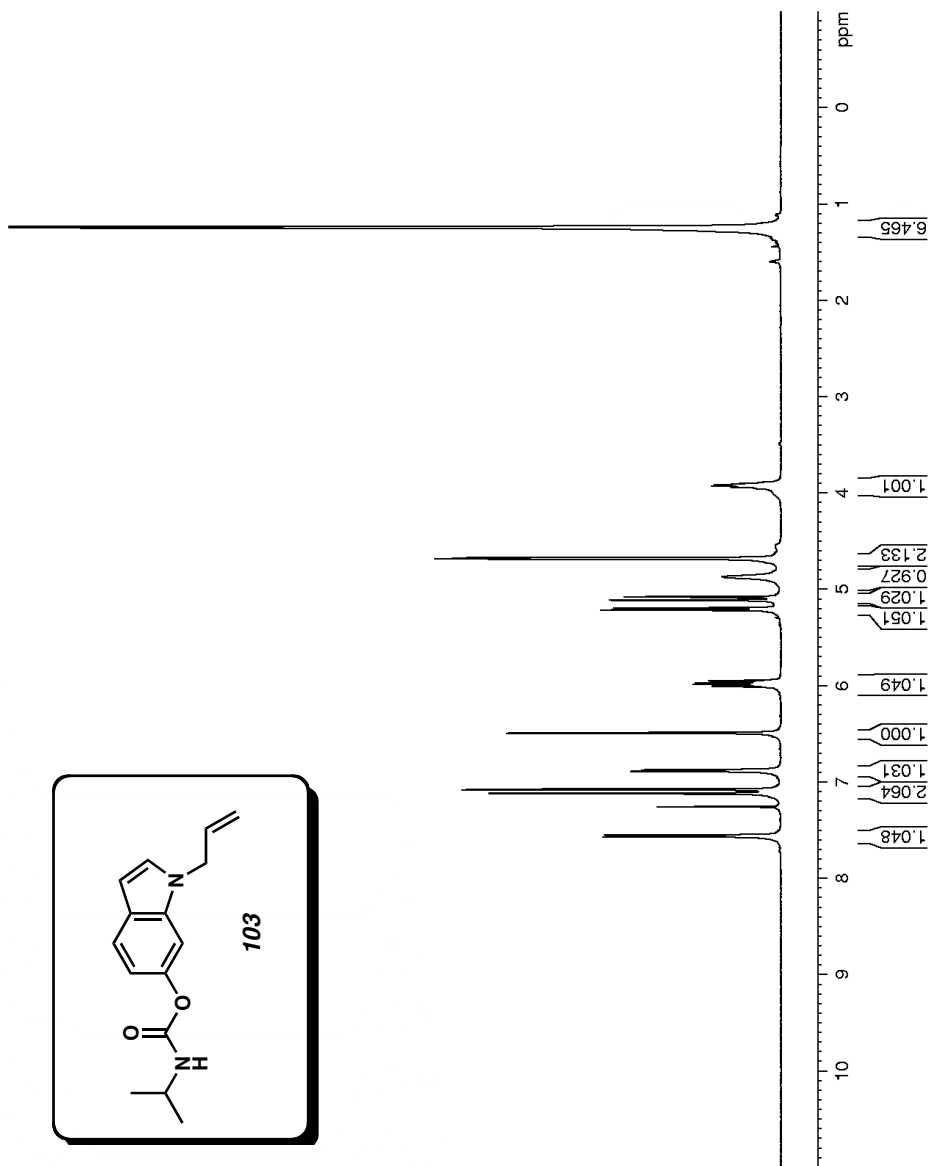



Current Data Parameters  
 NAME GJI-III-199  
 EXPNO 10  
 PROCNO 1

F2 - Acquisition Parameters  
 Date\_ 20100518  
 Time 10.06  
 INSTRUM aix500  
 PROBHD 5 mm broadband  
 PULPROG zg30  
 TD 65536  
 SOLVENT CDCl3  
 NS 8  
 DS 0  
 SWH 10000.000 Hz  
 FIDRES 0.152588 Hz  
 AQ 3.2768500 sec  
 RG 360  
 DW 50.000 usec  
 DE 71.43 usec  
 TE 300.0 K  
 LE 2.0000000 sec  
 P1 12.20 usec  
 SFO1 500.1330008 MHz  
 NUCLEUS 1H

F2 - Processing parameters  
 SI 32768  
 SF 500.1300238 MHz  
 WDW EM  
 SSB 0  
 LB 0.30 Hz  
 GB 0  
 PC 1.00

GJI-III-199 purified

7.638  
7.621  
7.260  
7.183  
7.176  
7.024  
7.007  
6.608  
6.601  
5.860  
5.849  
5.838  
5.828  
5.815  
5.804  
5.794  
5.783  
5.165  
5.144  
5.143  
4.947  
4.946  
4.913  
4.912  
4.826  
4.815

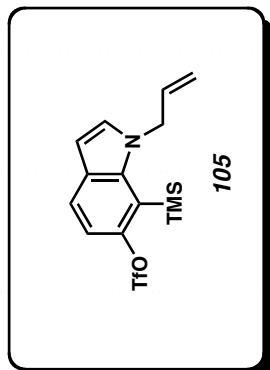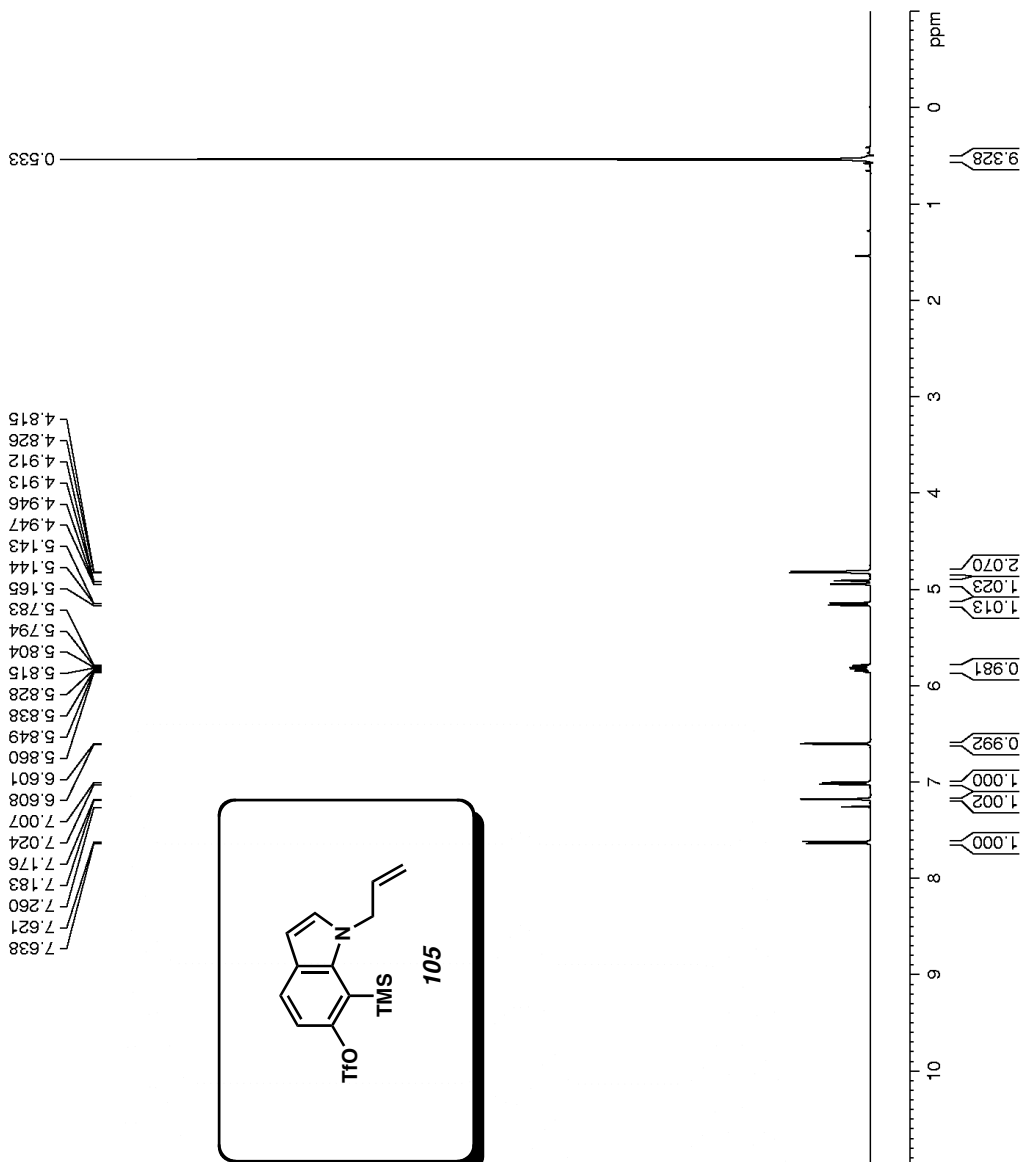

Current Data Parameters  
 NAME AEG-1-195ab  
 EXPNO 1  
 PROCNO 1

F2 - Acquisition Parameters  
 Date\_ 20100520  
 Time 2.32  
 INSTRUM avance500  
 PROBHD 5 mm bb-Z Z800  
 PULPROG zg30  
 TD 66536  
 SOLVENT CDCl3  
 NS 8  
 DS 0  
 SWH 10000.000 Hz  
 FIDRES 0.152588 Hz  
 AQ 3.2769001 sec  
 RG 128  
 DW 50.000 usec  
 DE 6.00 usec  
 TE 297.7 K  
 D1 2.0000000 sec  
 MCREST 0.0000000 sec  
 MCWRK 0.01500000 sec

===== CHANNEL f1 =====  
 NUC1 1H  
 P1 12.00 usec  
 PL1 0.00 dB  
 SFO1 500.3330020 MHz

F2 - Processing parameters  
 SI 65536  
 SF 500.3300227 MHz  
 WDW EM  
 SSB 0  
 LB 1.00 Hz  
 GB 0  
 PC 1.40

Carbon parameters (proton d

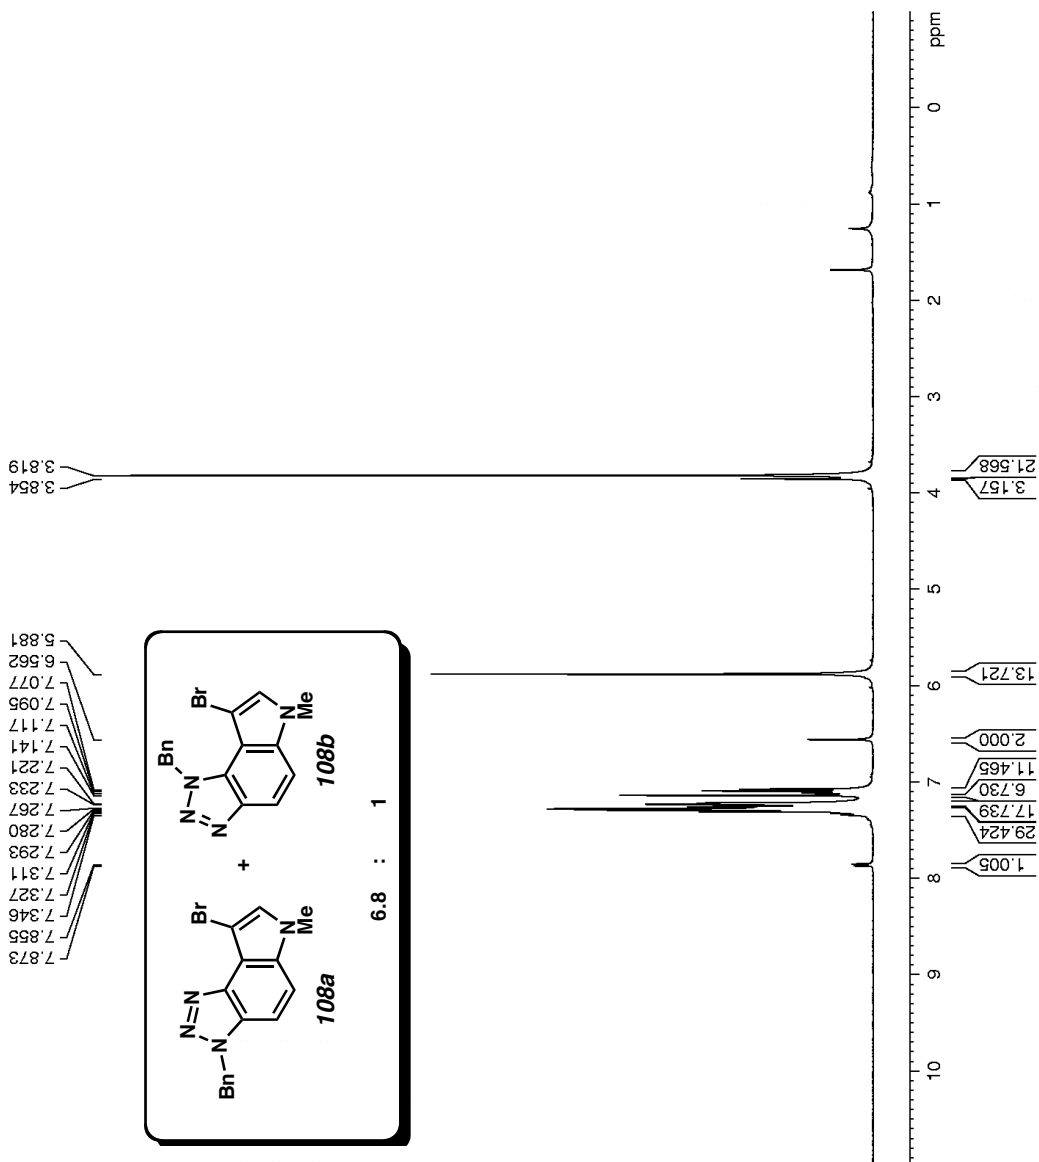

Current Data Parameters  
 NAME GJI-III-165  
 EXPNO 10  
 PROCNO 1

F2 - Acquisition Parameters  
 Date\_ 20100420  
 Time 20.44  
 INSTRUM aix500  
 PROBHD 5 mm broadband  
 PULPROG zg30  
 TD 66536  
 SOLVENT CDCl3  
 NS 16  
 DS 0  
 SWH 10000.000 Hz  
 FIDRES 0.152588 Hz  
 AQ 3.2768500 sec  
 RG 128  
 DW 50.000 usec  
 DE 71.43 usec  
 TE 300.0 K  
 D1 2.0000000 sec  
 P1 12.20 usec  
 SFO1 500.1330008 MHz  
 NUCLEUS 1H

F2 - Processing parameters  
 SI 32768  
 SF 500.1300235 MHz  
 WDW EM  
 SSB 0  
 LB 0.30 Hz  
 GB 0  
 PC 1.00

GJI-III-165 purified

7.928  
7.542  
7.525  
7.260  
7.070  
7.065  
7.063  
7.059  
6.873  
6.870  
6.869  
6.801  
6.797  
6.784  
6.780  
6.531  
6.529  
6.527  
6.525  
6.523  
6.521  
6.519

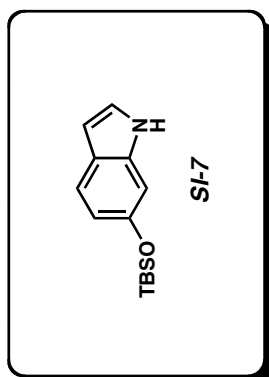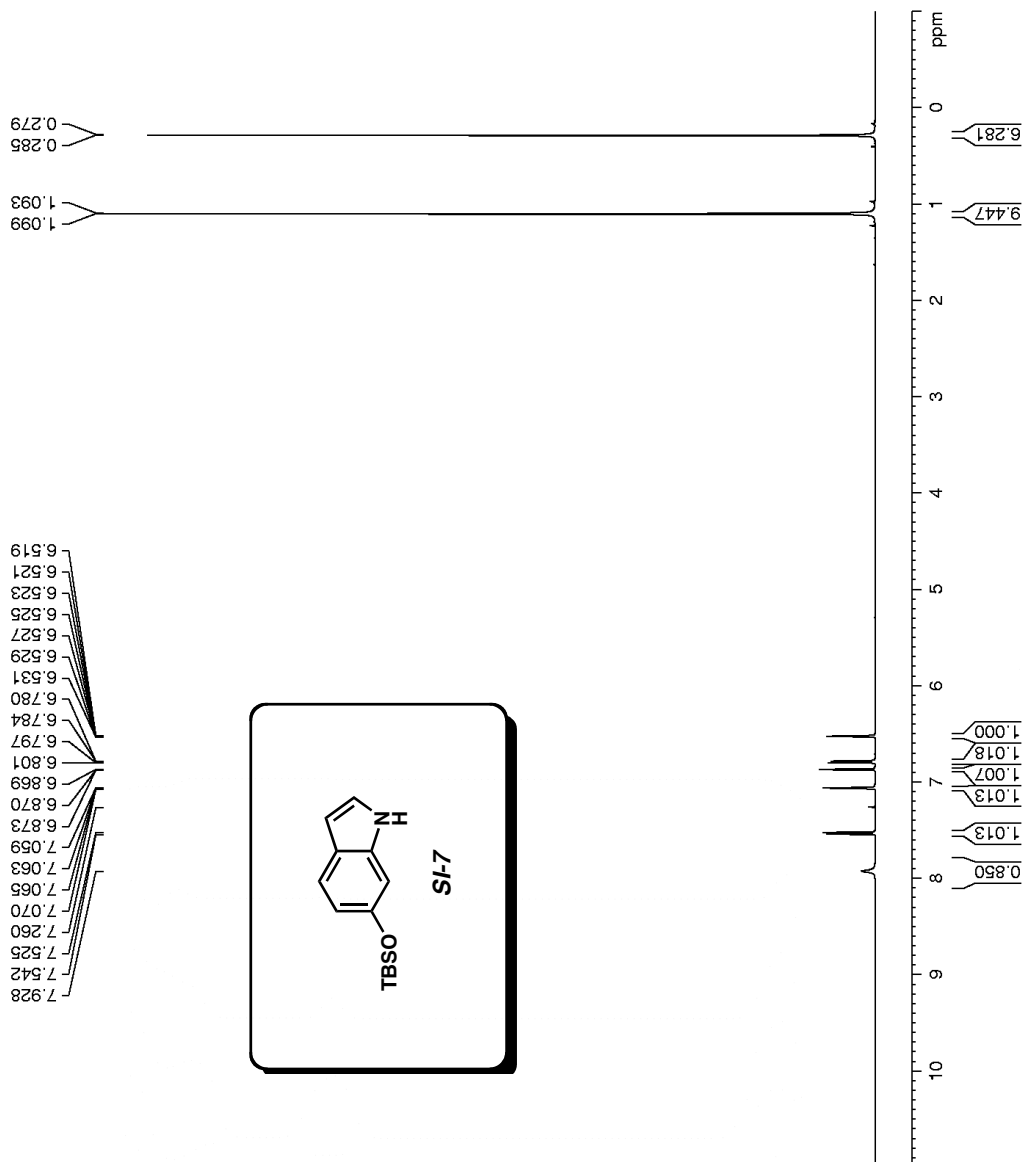



Current Data Parameters  
 NAME GJI-11-154-170  
 EXPNO 30  
 PROCNO 1

F2 - Acquisition Parameters  
 Date\_ 20090423  
 Time\_ 10.49  
 INSTRUM avance500  
 PROBHD 5 mm bb-Z Z800  
 PULPROG zg30  
 TD 66536  
 SOLVENT CDCl3  
 NS 16  
 DS 0  
 SWH 10000.000 Hz  
 FIDRES 0.152588 Hz  
 AQ 3.2769001 sec  
 RG 181  
 DW 50.000 usec  
 DE 6.00 usec  
 TE 293.5 K  
 D1 2.0000000 sec  
 MCREST 0.0000000 sec  
 MCWRK 0.01500000 sec

===== CHANNEL f1 =====  
 NUC1 1H  
 P1 12.00 usec  
 PL1 0.00 dB  
 SFO1 500.3330020 MHz

F2 - Processing parameters  
 SI 32768  
 SF 500.3300220 MHz  
 WDW EM  
 SSB 0  
 LB 0.30 Hz  
 GB 0  
 PC 1.00

:-154/170 prep TIC band 2-2

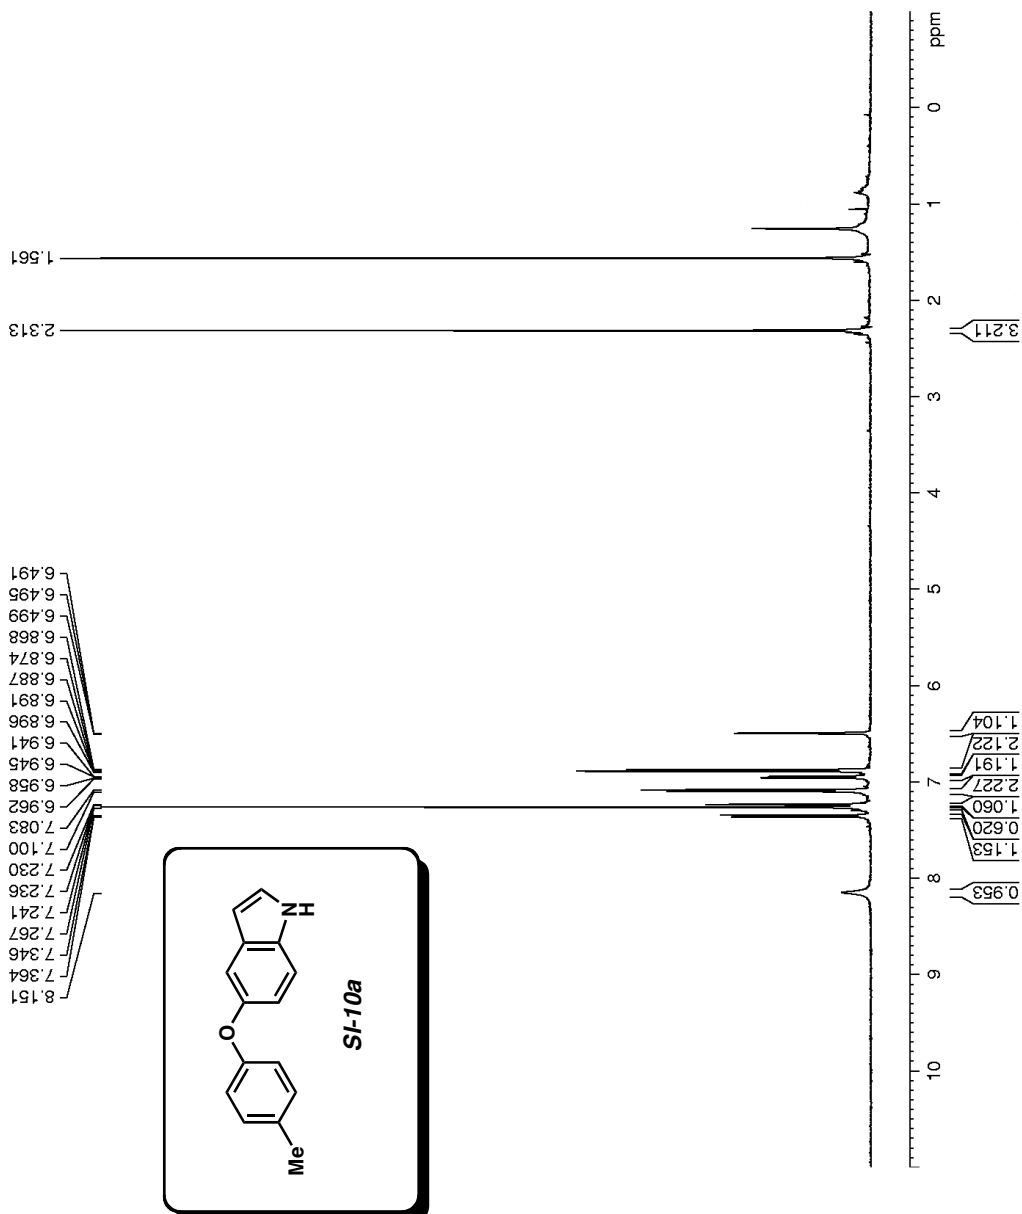

Current Data Parameters  
 NAME GJI-III-111  
 EXPNO 10  
 PROCNO 1

F2 – Acquisition Parameters  
 Date\_ 20100102  
 Time 1.17  
 INSTRUM avance500  
 PROBHD 5 mm bb-Z Z800  
 PULPROG zg30  
 TD 66536  
 SOLVENT CDCl3  
 NS 16  
 DS 0  
 SWH 10000.000 Hz  
 FIDRES 0.152588 Hz  
 AQ 3.2769001 sec  
 RG 143.7  
 DW 50.000 usec  
 DE 6.00 usec  
 TE 296.5 K  
 D1 2.00000000 sec  
 MCREST 0.00000000 sec  
 MCWRK 0.01500000 sec

===== CHANNEL f1 =====  
 NUC1 1H  
 P1 12.25 usec  
 PL1 0.00 dB  
 SFO1 500.3330020 MHz

F2 – Processing parameters  
 SI 32768  
 SF 500.3300220 MHz  
 WDW EM  
 SSB 0  
 LB 0.30 Hz  
 GB 0  
 PC 1.00

GJI-III-111 purified

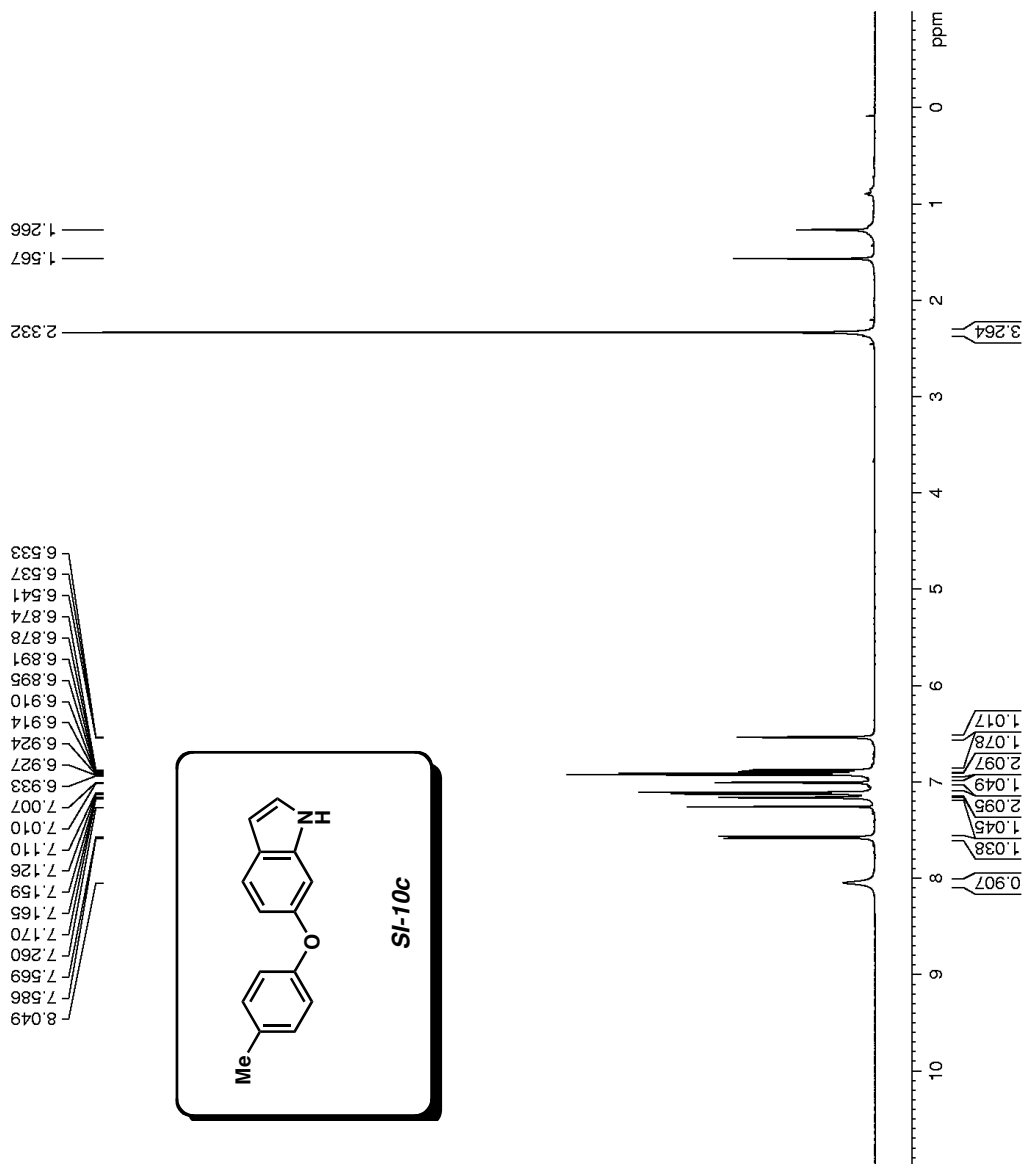





Current Data Parameters  
 NAME GJI-III-76  
 EXPNO 10  
 PROCNO 1

F2 - Acquisition Parameters  
 Date\_ 20091023  
 Time\_ 17.28  
 INSTRUM avance500  
 PROBHD 5 mm bb-Z Z800  
 PULPROG zg30  
 TD 66536  
 SOLVENT CDCl3  
 NS 16  
 DS 0  
 SWH 10000.000 Hz  
 FIDRES 0.152588 Hz  
 AQ 3.2769001 sec  
 RG 143.7  
 DW 50.000 usec  
 DE 6.00 usec  
 TE 295.5 K  
 D1 2.00000000 sec  
 MCREST 0.00000000 sec  
 MCWRK 0.01500000 sec

===== CHANNEL f1 =====  
 NUC1 1H  
 P1 12.25 usec  
 PL1 0.00 dB  
 SFO1 500.3330020 MHz

F2 - Processing parameters  
 SI 32768  
 SF 500.3300220 MHz  
 WDW EM  
 SSB 0  
 LB 0.30 Hz  
 GB 0  
 PC 1.00

GJI-III-76 purified

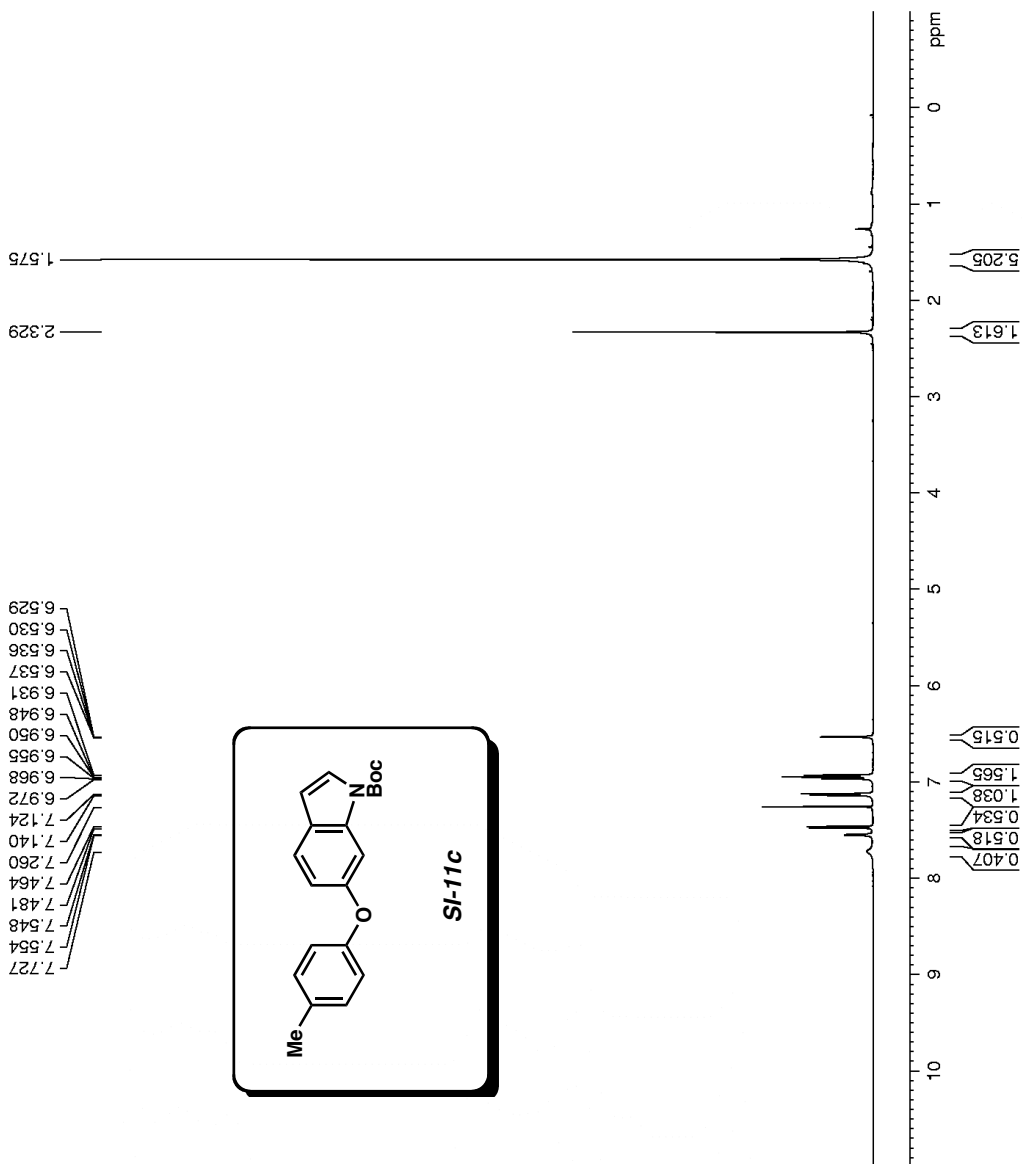

Current Data Parameters  
 NAME GJI-III-102  
 EXPNO 40  
 PROCNO 1

F2 - Acquisition Parameters  
 Date\_ 20091221  
 Time\_ 3.23  
 INSTRUM avance500  
 PROBHD 5 mm bb-Z Z800  
 PULPROG zg30  
 TD 66536  
 SOLVENT CDCl3  
 NS 16  
 DS 0  
 SWH 10000.000 Hz  
 FIDRES 0.152588 Hz  
 AQ 3.2769001 sec  
 RG 203.2  
 DW 50.000 usec  
 DE 6.00 usec  
 TE 298.0 K  
 D1 2.00000000 sec  
 MCREST 0.00000000 sec  
 MCWRK 0.01500000 sec

===== CHANNEL f1 =====  
 NUC1 1H  
 P1 12.00 usec  
 PL1 0.00 dB  
 SFO1 500.3330020 MHz

F2 - Processing parameters  
 SI 32768  
 SF 500.3300220 MHz  
 WDW EM  
 SSB 0  
 LB 0.30 Hz  
 GB 0  
 PC 1.00

:-III-102 pTLC Band 3 purif.

8.092  
7.438  
7.435  
7.348  
7.331  
7.260  
7.230  
7.226  
7.213  
7.206  
7.200  
7.198  
7.053  
7.049  
7.036  
7.032  
6.954  
6.938  
6.937  
6.833  
6.819  
6.804  
6.495  
6.491  
6.487  
5.640

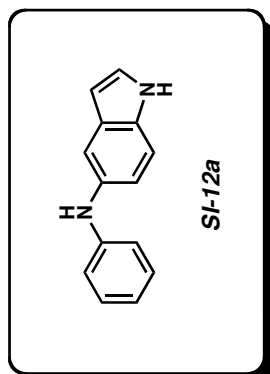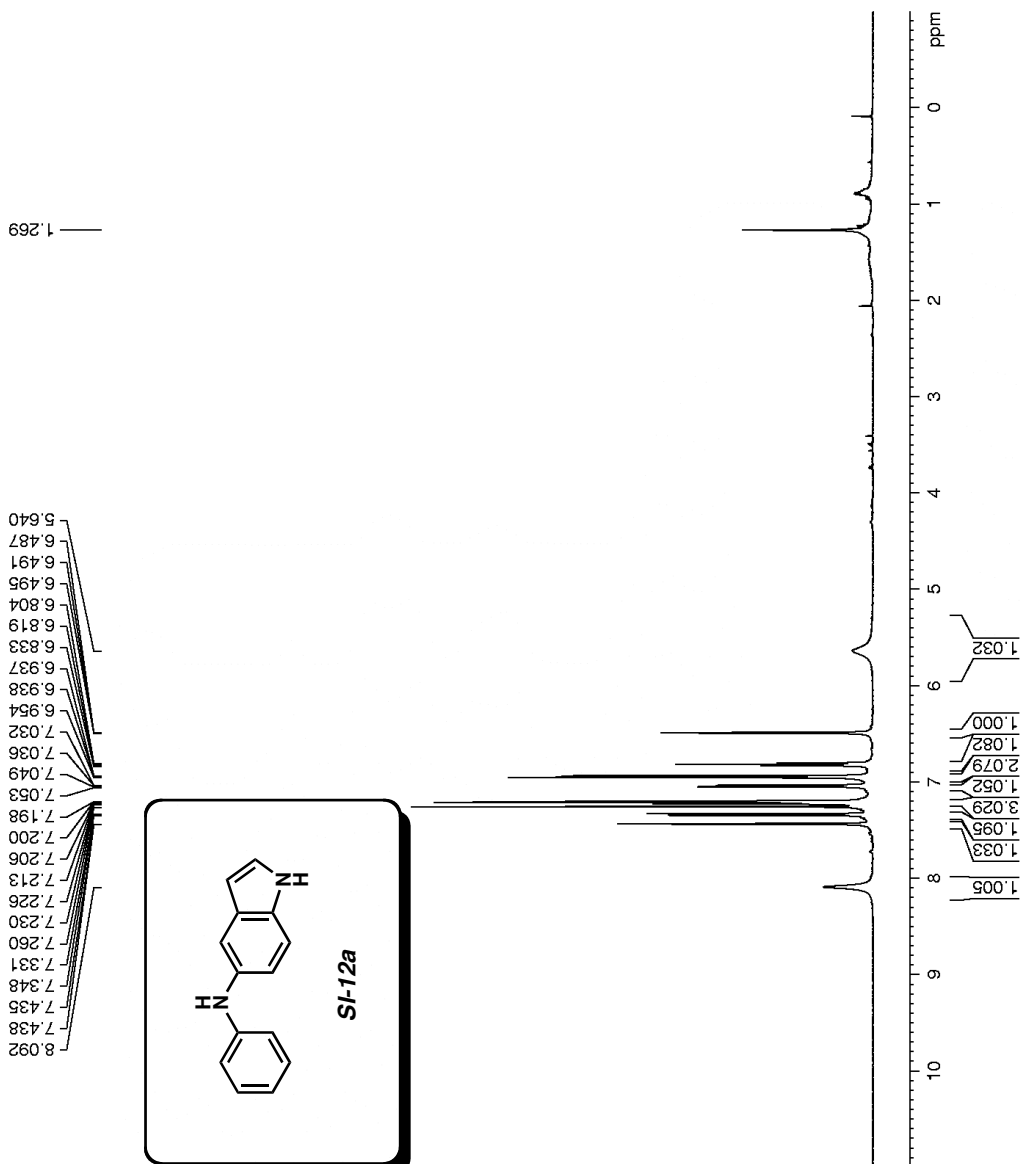

Current Data Parameters  
 NAME GJI-III-117  
 EXPNO 30  
 PROCNO 1

F2 - Acquisition Parameters  
 Date\_ 20100205  
 Time 14.26  
 INSTRUM aix500  
 PROBHD 5 mm broadband  
 PULPROG zg30  
 TD 66536  
 SOLVENT CDCl3  
 NS 16  
 DS 0  
 SWH 10000.000 Hz  
 FIDRES 0.152588 Hz  
 AQ 3.2768500 sec  
 RG 1024  
 DW 50.000 usec  
 DE 71.43 usec  
 TE 300.0 K  
 D1 2.00000000 sec  
 P1 12.20 usec  
 SFO1 500.1330008 MHz  
 NUCLEUS 1H

F2 - Processing parameters  
 SI 32768  
 SF 500.1300237 MHz  
 WDW EM  
 SSB 0  
 LB 0.30 Hz  
 GB 0  
 PC 1.00

GJI-III-117 Band 3

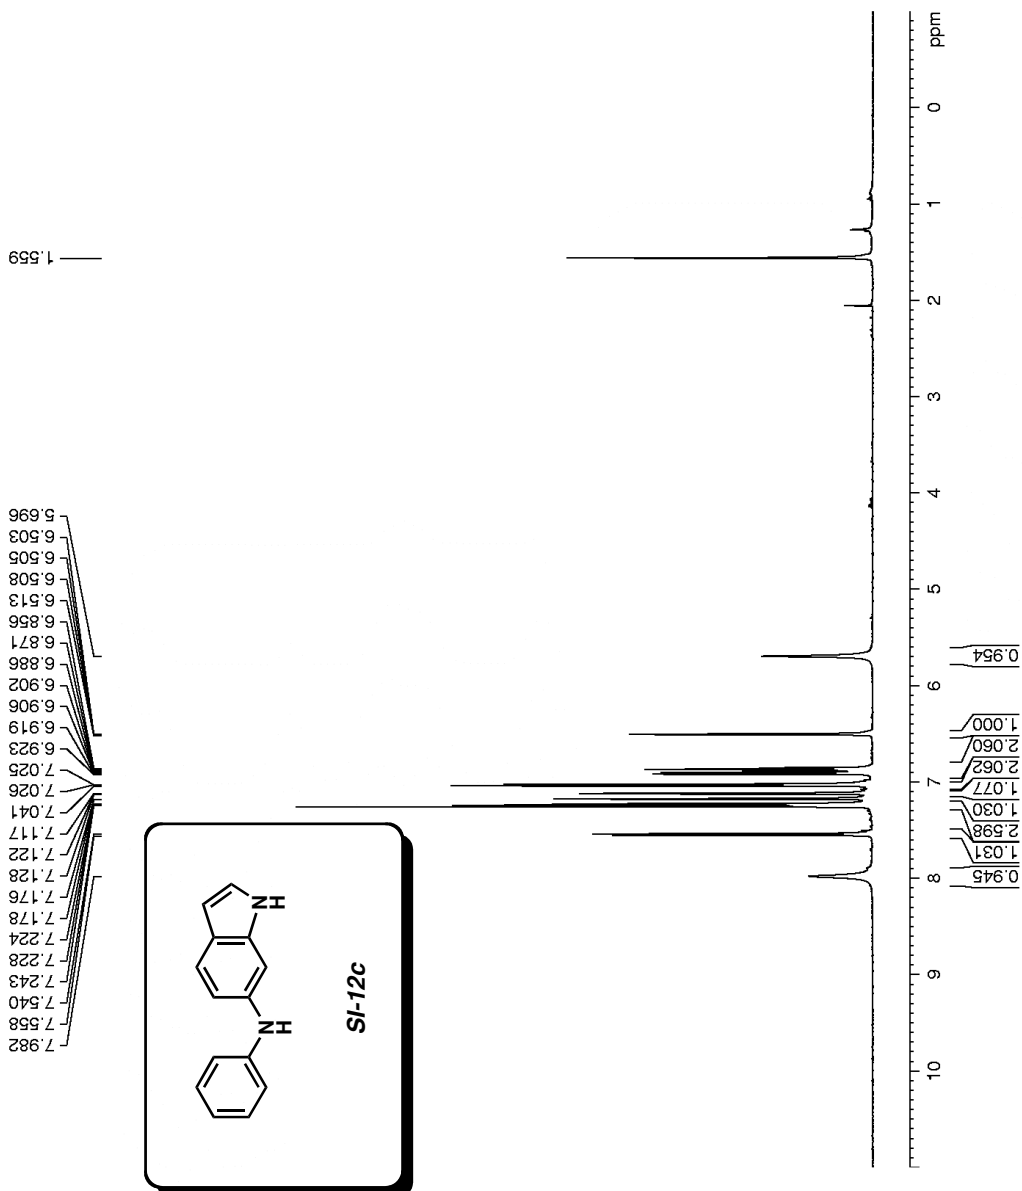

Current Data Parameters  
 NAME GJI-III-103  
 EXPNO 100  
 PROCNO 1

F2 - Acquisition Parameters  
 Date\_ 20100602  
 Time\_ 16.28  
 INSTRUM avance500  
 PROBHD 5 mm bb-Z Z800  
 PULPROG zg30  
 TD 66536  
 SOLVENT CDCl3  
 NS 16  
 DS 0  
 SWH 10000.000 Hz  
 FIDRES 0.152588 Hz  
 AQ 3.2769001 sec  
 RG 143.7  
 DW 50.000 usec  
 DE 6.00 usec  
 TE 297.8 K  
 D1 2.00000000 sec  
 MCREST 0.00000000 sec  
 MCWRK 0.01500000 sec

===== CHANNEL f1 =====  
 NUC1 1H  
 P1 12.25 usec  
 PL1 0.00 dB  
 SFO1 500.3330020 MHz

F2 - Processing parameters  
 SI 32768  
 SF 500.3300220 MHz  
 WDW EM  
 SSB 0  
 LB 0.30 Hz  
 GB 0  
 PC 1.00

GJI-III-103 pTLC 2 Band 2

8.046  
7.576  
7.310  
7.306  
7.260  
7.243  
7.228  
7.094  
7.090  
7.076  
7.072  
7.047  
7.023  
7.007  
7.006  
6.889  
6.875  
6.860  
6.483  
6.476  
5.683

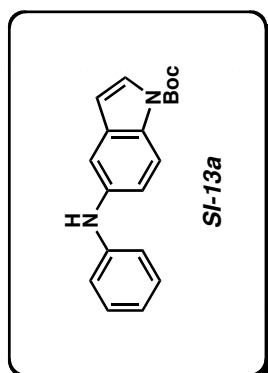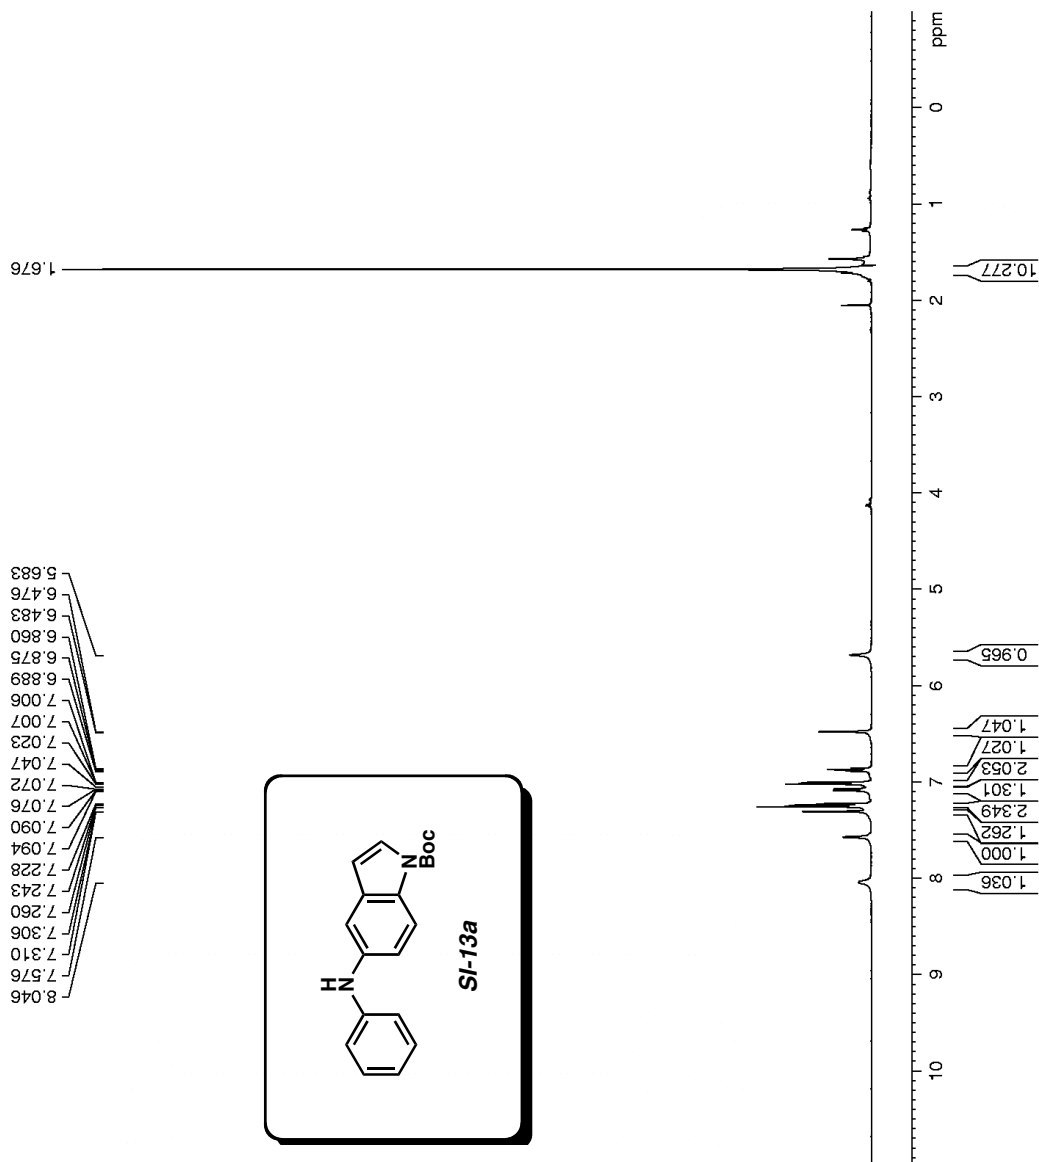



Current Data Parameters  
 NAME GJI-III-114  
 EXPNO 10  
 PROCNO 1

F2 - Acquisition Parameters  
 Date\_ 20100102  
 Time 2.14  
 INSTRUM avance500  
 PROBHD 5 mm bb-Z Z800  
 PULPROG zg30  
 TD 68536  
 SOLVENT CDC13  
 NS 8  
 DS 0  
 SWH 10000.000 Hz  
 FIDRES 0.152588 Hz  
 AQ 3.2769001 sec  
 RG 114  
 DW 50.000 usec  
 DE 6.00 usec  
 TE 313.0 K  
 D1 2.0000000 sec  
 MCREST 0.0000000 sec  
 MCWRK 0.01500000 sec

===== CHANNEL f1 =====  
 NUC1 1H  
 P1 12.00 usec  
 PL1 0.00 dB  
 SFO1 500.3330020 MHz

F2 - Processing parameters  
 SI 32768  
 SF 500.3300220 MHz  
 WDW EM  
 SSB 0  
 LB 0.30 Hz  
 GB 0  
 PC 1.00

GJI-III-114 purified 40 dec

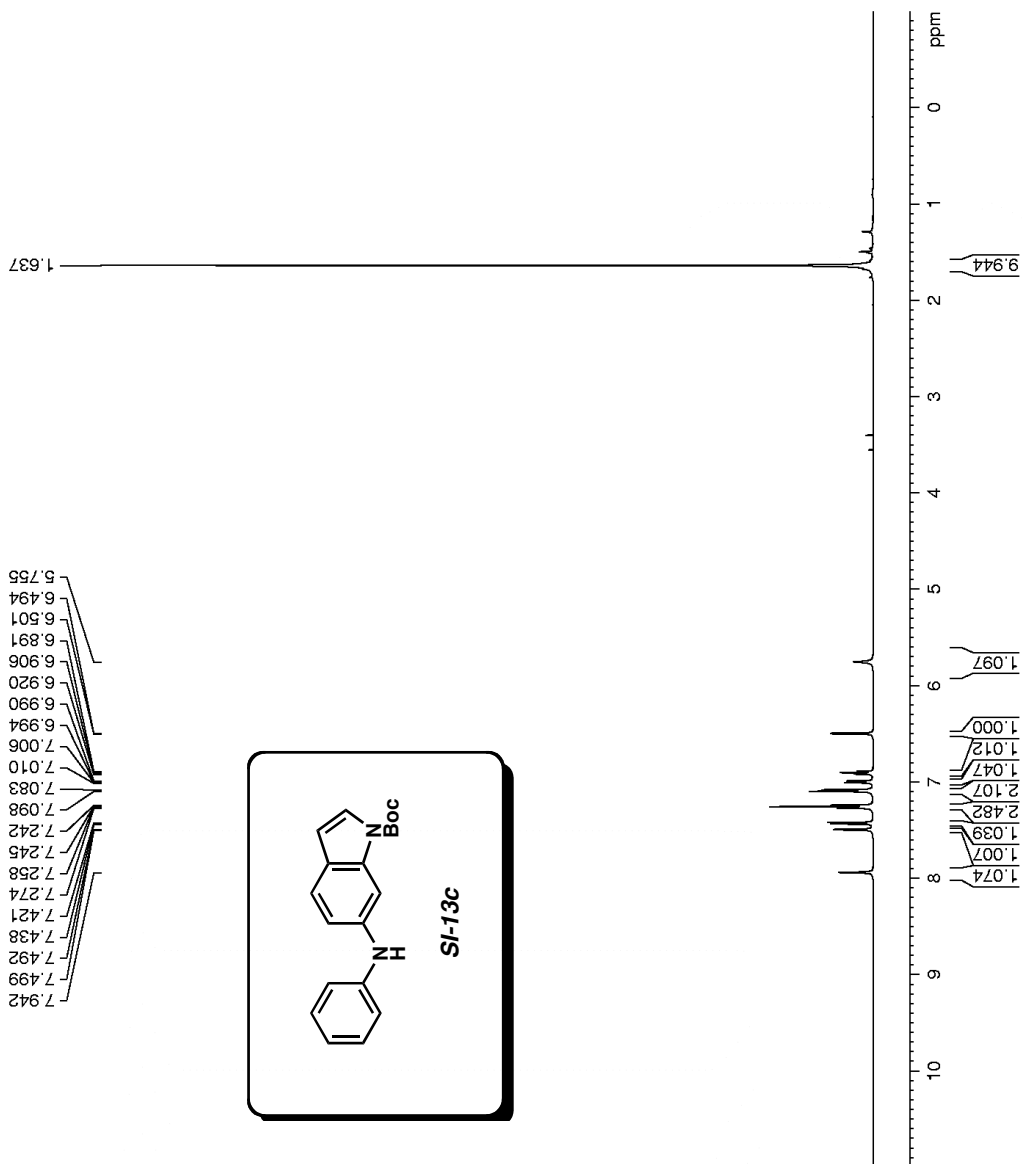

Current Data Parameters  
 NAME GJI-II-158  
 EXPNO 30  
 PROCNO 1

F2 - Acquisition Parameters  
 Date\_ 20090401  
 Time 10.34  
 INSTRUM avance500  
 PROBHD 5 mm bb-Z Z800  
 PULPROG zg30  
 TD 66536  
 SOLVENT DMSO  
 NS 16  
 DS 0  
 SWH 10000.000 Hz  
 FIDRES 0.152588 Hz  
 AQ 3.2769001 sec  
 RG 143.7  
 DW 50.000 usec  
 DE 6.00 usec  
 TE 293.2 K  
 D1 2.00000000 sec  
 MCREST 0.00000000 sec  
 MCWRK 0.01500000 sec

===== CHANNEL f1 =====  
 NUC1 1H  
 P1 12.00 usec  
 PL1 0.00 dB  
 SFO1 500.3330020 MHz

F2 - Processing parameters  
 SI 32768  
 SF 500.3300220 MHz  
 WDW EM  
 SSB 0  
 LB 0.30 Hz  
 GB 0  
 PC 1.00

GJI-II-158 pure DMSO-D6

7.621  
7.603  
7.569  
7.552  
7.453  
7.445  
7.426  
7.413  
7.390  
7.373  
7.337  
7.310  
7.294  
7.280  
7.271  
7.258  
7.237  
7.222  
7.204  
6.851  
6.812  
6.065  
5.973  
5.966  
5.933  
5.725  
3.980  
3.994  
3.357  
3.330  
3.317  
2.503  
2.463  
1.950  
1.874  
1.739  
1.225  
1.211  
1.189  
1.146  
1.132  
1.117  
0.837  
0.822  
0.808

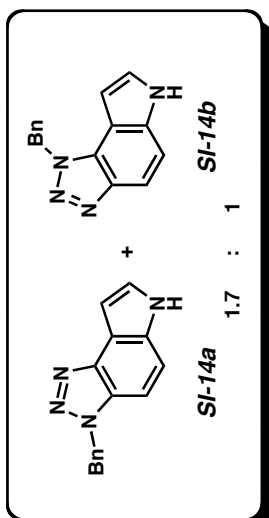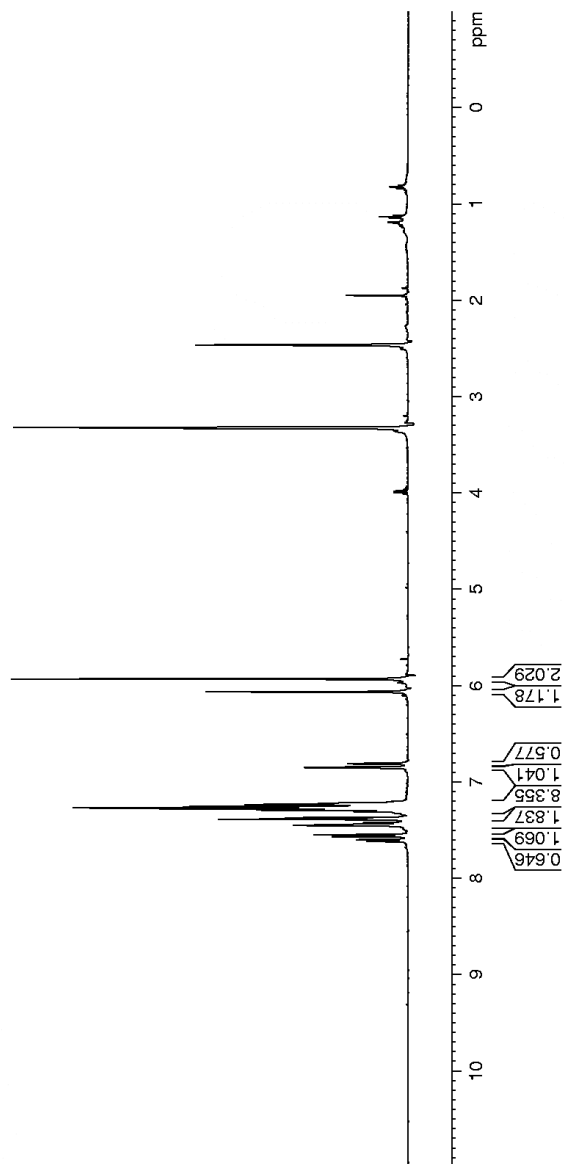

Current Data Parameters  
 NAME GJI-II-159  
 EXPNO 10  
 PROCNO 1

F2 - Acquisition Parameters  
 Date\_ 20090331  
 Time\_ 16.31  
 INSTRUM avance500  
 PROBHD 5 mm bb-Z Z800  
 PULPROG zg30  
 TD 68536  
 SOLVENT CDCl3  
 NS 16  
 DS 0  
 SWH 10000.000 Hz  
 FIDRES 0.152588 Hz  
 AQ 3.2769001 sec  
 RG 181  
 DW 50.000 usec  
 DE 6.00 usec  
 TE 313.7 K  
 D1 2.0000000 sec  
 MCREST 0.0000000 sec  
 MCWRK 0.01500000 sec

===== CHANNEL f1 =====  
 NUC1 1H  
 P1 12.00 usec  
 PL1 0.00 dB  
 SFO1 500.3330020 MHz

F2 - Processing parameters  
 SI 32768  
 SF 500.3300220 MHz  
 WDW EM  
 SSB 0  
 LB 0.30 Hz  
 GB 0  
 PC 1.00

GJI-II-159 pure 40 deg

8.365  
8.347  
8.300  
8.281  
7.949  
7.930  
7.745  
7.738  
7.625  
7.618  
7.329  
7.316  
7.302  
7.284  
7.272  
7.258  
7.213  
7.205  
7.197  
6.585  
6.578  
6.042  
5.887

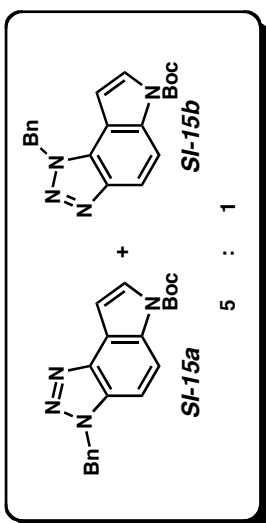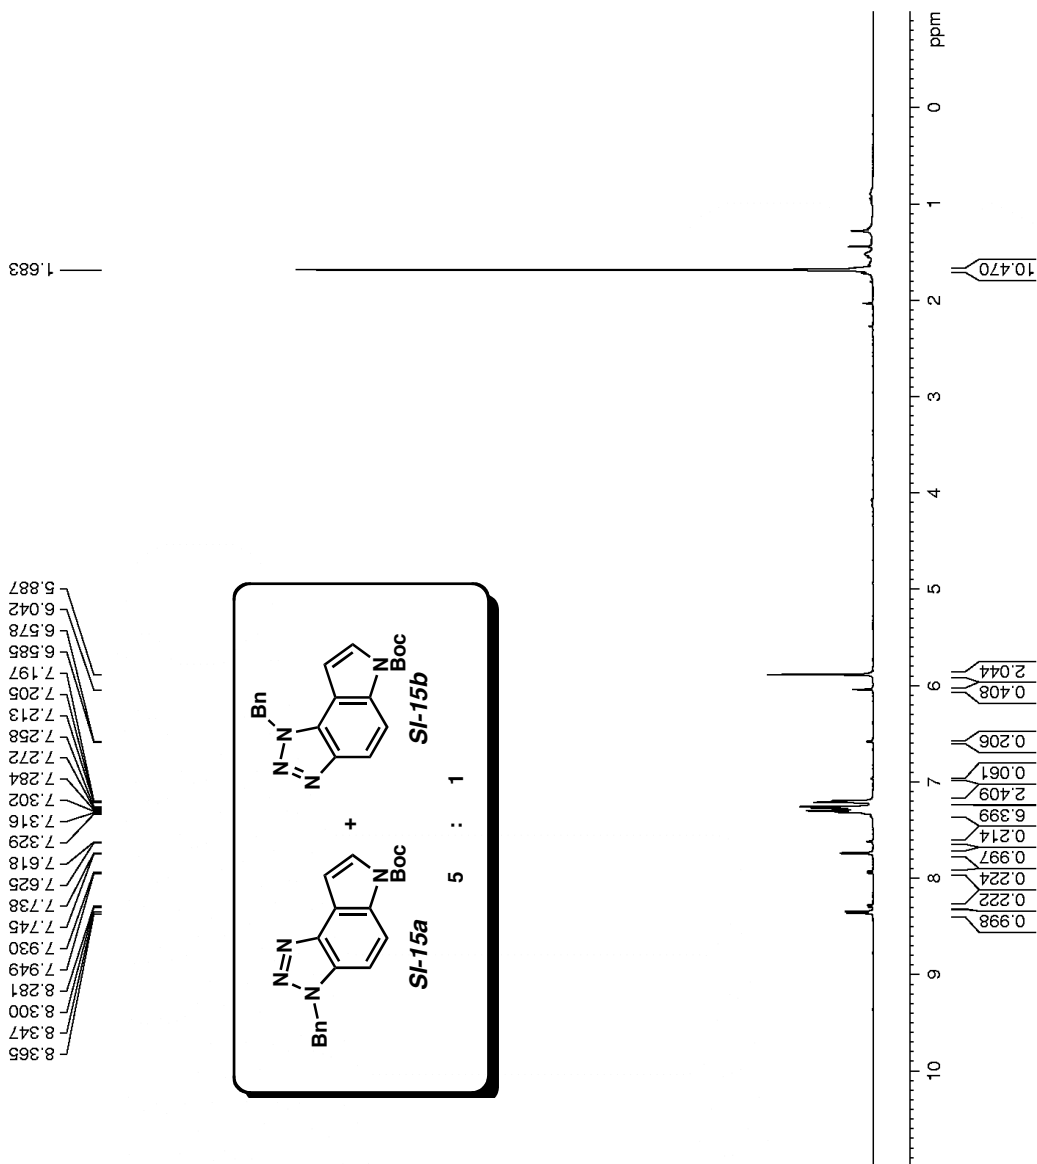

Current Data Parameters  
 NAME GJI-III-118  
 EXPNO 10  
 PROCNO 1

F2 - Acquisition Parameters  
 Date\_ 20100206  
 Time\_ 14.41  
 INSTRUM aix500  
 PROBHD 5 mm broadband  
 PULPROG zg30  
 TD 66536  
 SOLVENT CDCl3  
 NS 16  
 DS 0  
 SWH 10000.000 Hz  
 FIDRES 0.152588 Hz  
 AQ 3.2768500 sec  
 RG 2860  
 DW 50.000 usec  
 DE 71.43 usec  
 TE 300.0 K  
 D1 2.00000000 sec  
 P1 12.20 usec  
 SFO1 500.1330008 MHz  
 NUCLEUS 1H

F2 - Processing parameters  
 SI 32768  
 SF 500.1300238 MHz  
 WDW EM  
 SSB 0  
 LB 0.30 Hz  
 GB 0  
 PC 1.00

GJI-III-118 Band 2

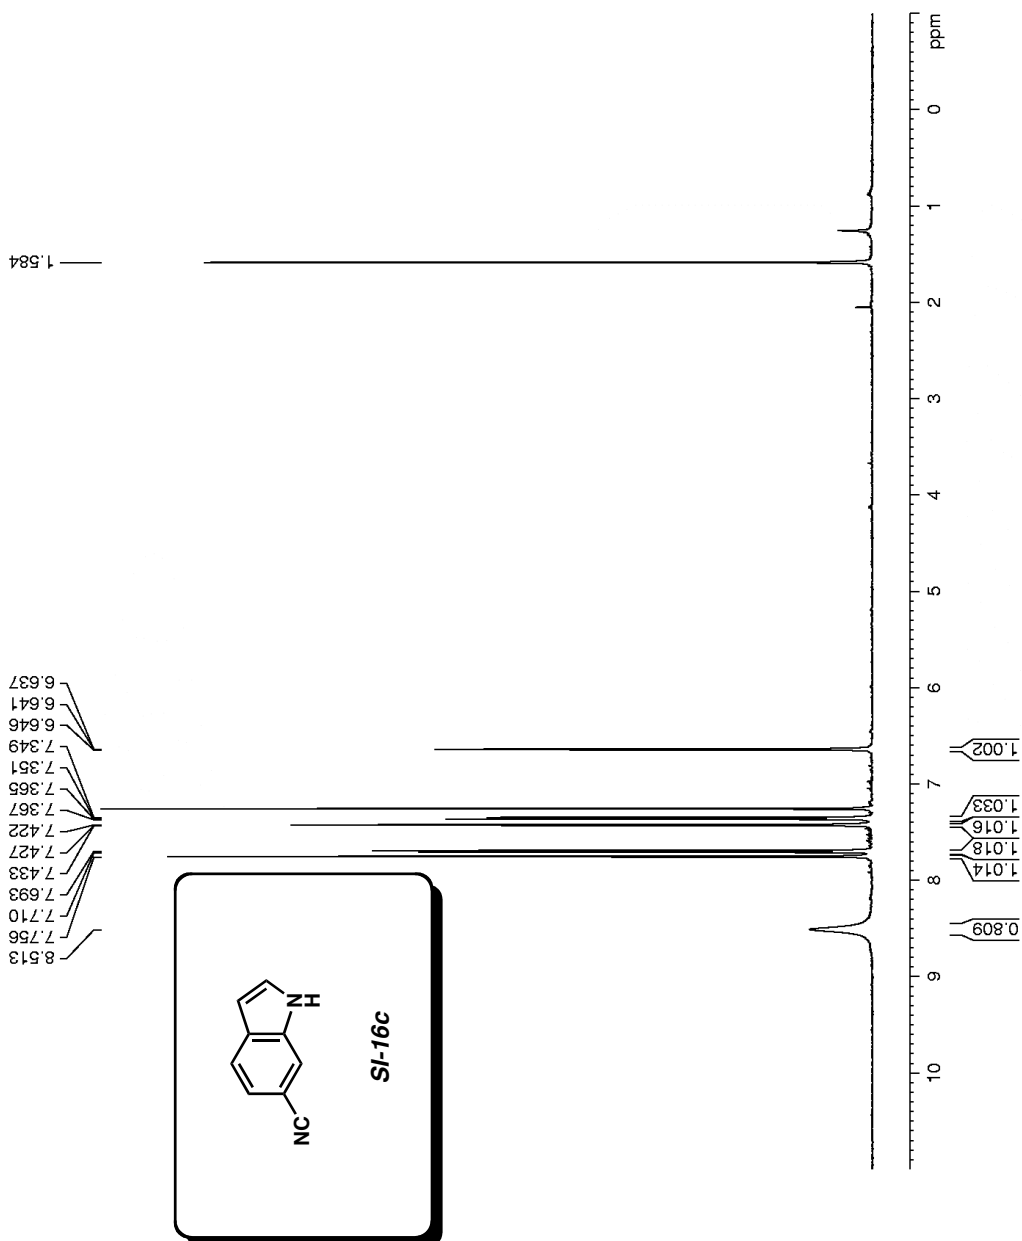

GJI-II-164 band 2 prep TLC

8.256  
8.239  
7.900  
7.898  
7.706  
7.699  
7.568  
7.565  
7.551  
7.548  
7.260  
6.624  
6.631

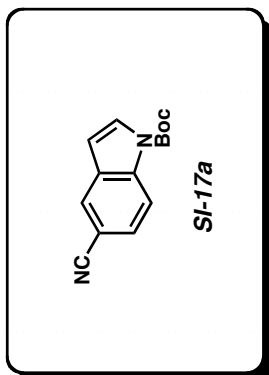

Current Data Parameters  
 NAME GJI-II-164  
 EXPNO 11  
 PROCNO 1

F2 - Acquisition Parameters  
 Date\_ 20090405  
 Time\_ 10:53  
 INSTRUM avance500  
 PROBHD 5 mm bb-Z Z800  
 PULPROG zg30  
 TD 66536  
 SOLVENT CDCl3  
 NS 16  
 DS 0  
 SWH 10000.000 Hz  
 FIDRES 0.152588 Hz  
 AQ 3.2769001 sec  
 RG 181  
 DW 50.000 usec  
 DE 6.00 usec  
 TE 292.9 K  
 D1 2.00000000 sec  
 MCREST 0.00000000 sec  
 MCWRK 0.01500000 sec

===== CHANNEL f1 =====  
 NUJC1 1H  
 P1 12.00 usec  
 PL1 0.00 dB  
 SFO1 500.3330020 MHz

F2 - Processing parameters  
 SI 32768  
 SF 500.3300220 MHz  
 WDW EM  
 SSB 0  
 LB 0.30 Hz  
 GB 0  
 PC 1.00

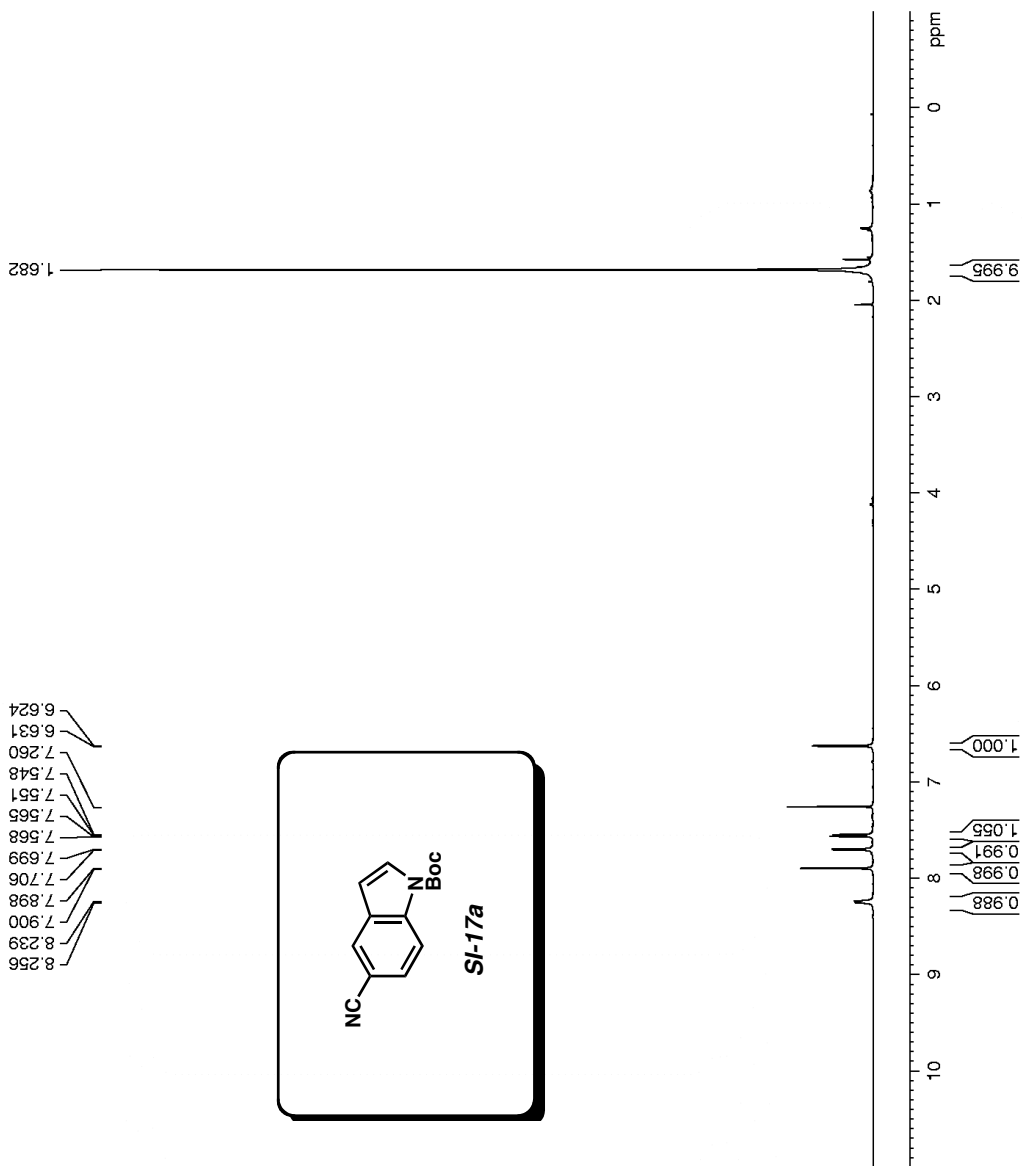

Current Data Parameters  
 NAME GJI-III-181  
 EXPNO 12  
 PROCNO 1

F2 - Acquisition Parameters  
 Date\_ 20100430  
 Time 1.45  
 INSTRUM avance500  
 PROBHD 5 mm bb-Z Z800  
 PULPROG zg30  
 TD 68536  
 SOLVENT CDCl3  
 NS 8  
 DS 0  
 SWH 10000.000 Hz  
 FIDRES 0.152588 Hz  
 AQ 3.2769001 sec  
 RG 90.5  
 DW 50.000 usec  
 DE 6.00 usec  
 TE 313.2 K  
 D1 2.00000000 sec  
 MCREST 0.00000000 sec  
 MCWRK 0.01500000 sec

===== CHANNEL f1 =====  
 NU1C1 1H  
 P1 12.25 usec  
 PL1 0.00 dB  
 SFO1 500.3330020 MHz

F2 - Processing parameters  
 SI 32768  
 SF 500.3300209 MHz  
 EM  
 WDW EM  
 SSB 0  
 LB 0.30 Hz  
 GB 0  
 PC 1.00

GJI-III-181 purified 40 dec

8.406  
8.390  
7.749  
7.742  
7.548  
7.533  
7.365  
7.349  
7.333  
7.260  
6.789  
6.781

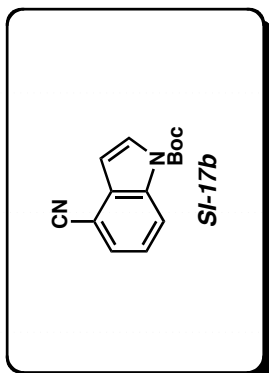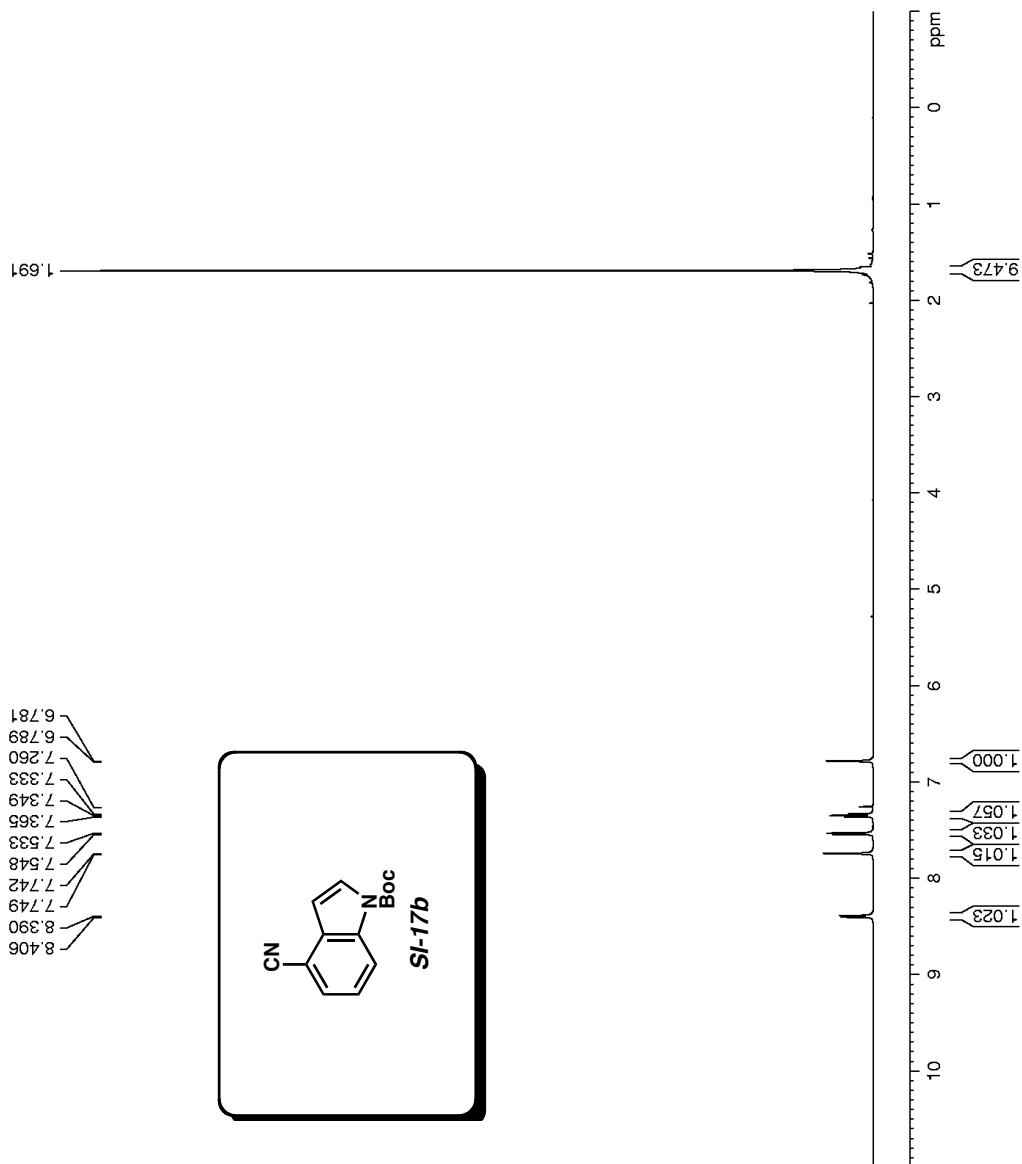

Current Data Parameters  
 NAME GJI-III-71  
 EXPNO 20  
 PROCNO 1

F2 - Acquisition Parameters  
 Date\_ 20091221  
 Time 1.19  
 INSTRUM avance500  
 PROBHD 5 mm bb-Z Z800  
 PULPROG zg30  
 TD 68536  
 SOLVENT CDCl3  
 NS 16  
 DS 0  
 SWH 10000.000 Hz  
 FIDRES 0.152588 Hz  
 AQ 3.2769001 sec  
 RG 181  
 DW 50.000 usec  
 DE 6.00 usec  
 TE 313.2 K  
 D1 2.00000000 sec  
 MCREST 0.00000000 sec  
 MCWRK 0.01500000 sec

===== CHANNEL f1 =====  
 NUC1 1H  
 P1 12.00 usec  
 PL1 0.00 dB  
 SFO1 500.3330020 MHz

F2 - Processing parameters  
 SI 32768  
 SF 500.3300220 MHz  
 WDW EM  
 SSB 0  
 LB 0.30 Hz  
 GB 0  
 PC 1.00

GJI-III-71 purified 40 deg

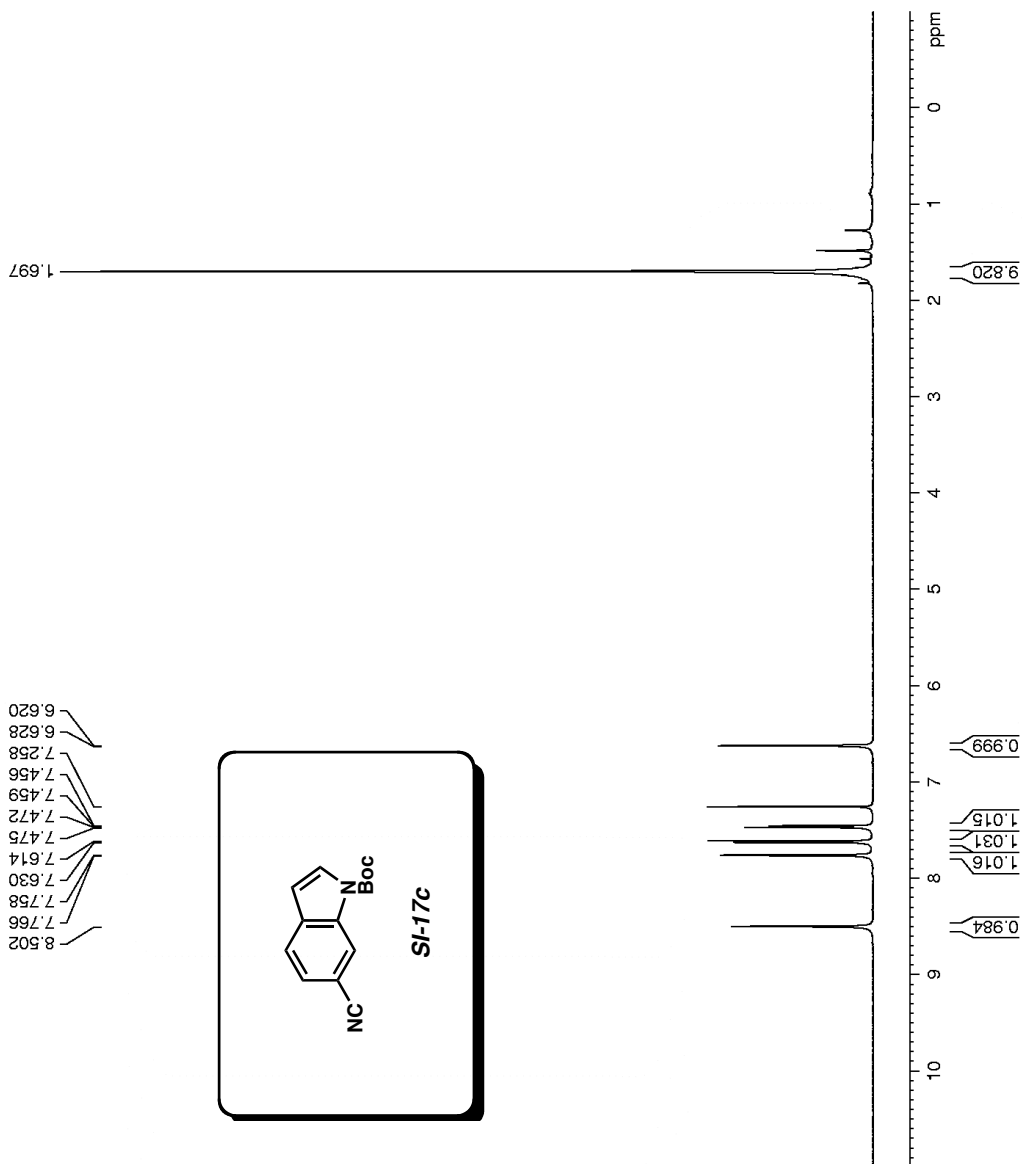

Current Data Parameters  
 NAME GJI-III-196  
 EXPNO 20  
 PROCNO 1

F2 - Acquisition Parameters  
 Date\_ 20100514  
 Time 20:39  
 INSTRUM avance500  
 PROBHD 5 mm bb-Z Z800  
 PULPROG zg30  
 TD 66536  
 SOLVENT CDCl3  
 NS 16  
 DS 0  
 SWH 10000.000 Hz  
 FIDRES 0.152588 Hz  
 AQ 3.2769001 sec  
 RG 128  
 DW 50.000 usec  
 DE 6.00 usec  
 TE 298.2 K  
 D1 2.00000000 sec  
 MCREST 0.00000000 sec  
 MCWRK 0.01500000 sec

===== CHANNEL f1 =====  
 NUC1 1H  
 P1 12.25 usec  
 PL1 0.00 dB  
 SFO1 500.3330020 MHz

F2 - Processing parameters  
 SI 32768  
 SF 500.3300220 MHz  
 WDW EM  
 SSB 0  
 LB 0.30 Hz  
 GB 0  
 PC 1.00

GJI-III-196 Band 2

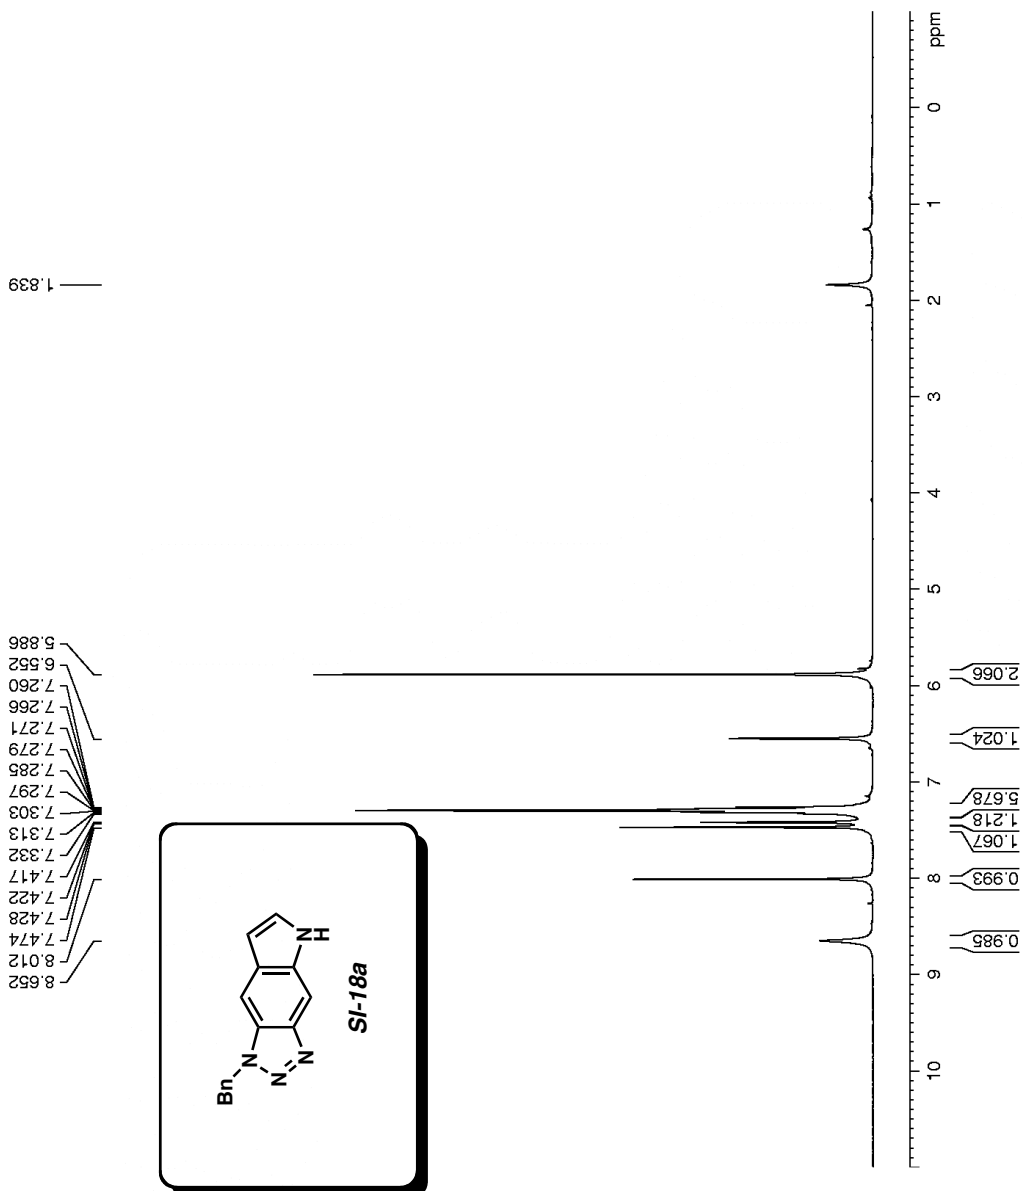



Current Data Parameters  
 NAME GJI-II-196  
 EXPNO 30  
 PROCNO 1

F2 - Acquisition Parameters  
 Date\_ 20100514  
 Time 23:03  
 INSTRUM avance500  
 PROBHD 5 mm bb-Z Z800  
 PULPROG zg30  
 TD 66536  
 SOLVENT CDCl3  
 NS 16  
 DS 0  
 SWH 10000.000 Hz  
 FIDRES 0.152588 Hz  
 AQ 3.2769001 sec  
 RG 203.2  
 DW 50.000 usec  
 DE 6.00 usec  
 TE 298.2 K  
 D1 2.00000000 sec  
 MCREST 0.00000000 sec  
 MCWRK 0.01500000 sec

===== CHANNEL f1 =====  
 NUC1 1H  
 P1 12.00 usec  
 PL1 0.00 dB  
 SFO1 500.3330020 MHz

F2 - Processing parameters  
 SI 32768  
 SF 500.3300220 MHz  
 EM  
 WDW EM  
 SSB 0  
 LB 0.30 Hz  
 GB 0  
 PC 1.00

GJI-II-196 Band 1

1.256  
 1.602

5.862  
 6.668  
 7.146  
 7.252  
 7.260  
 7.283  
 7.300  
 7.315  
 8.098  
 8.266

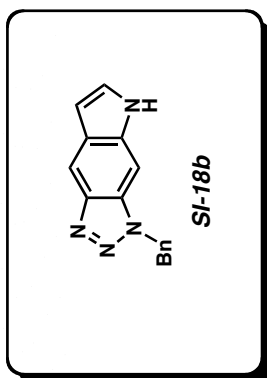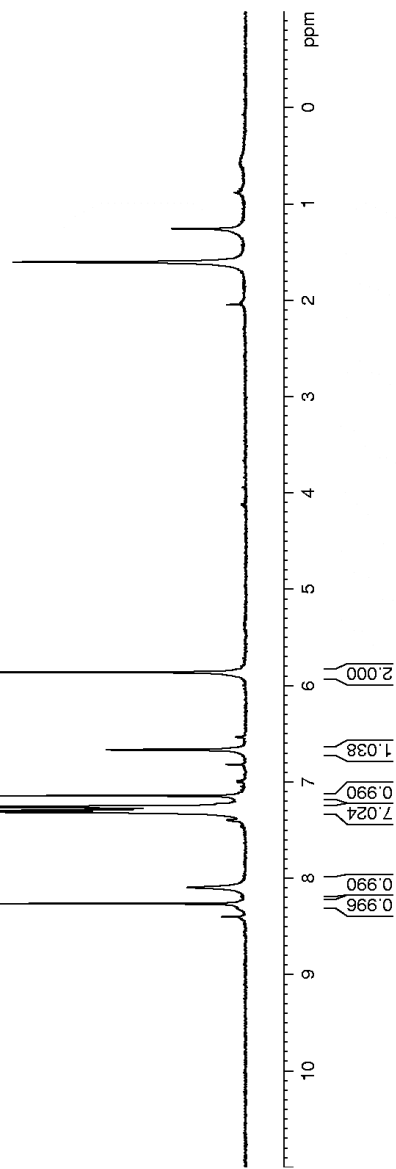

GJI-II-179 + 188 purified

8.758  
8.148  
7.748  
7.636  
7.354  
7.343  
7.322  
7.308  
7.293  
7.286  
7.276  
7.260  
7.246  
6.667  
6.659  
6.659  
6.551  
6.551  
5.875  
5.862

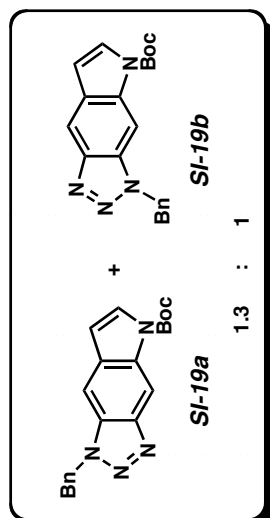

Current Data Parameters  
 NAME GJI-II-179188  
 EXPNO 10  
 PROCNO 1

F2 - Acquisition Parameters  
 Date\_ 20100521  
 Time\_ 21.16  
 INSTRUM avance500  
 PROBHD 5 mm bb-Z Z800  
 PULPROG zg30  
 TD 66536  
 SOLVENT CDCl3  
 NS 8  
 DS 0  
 SWH 10000.000 Hz  
 FIDRES 0.152588 Hz  
 AQ 3.2769001 sec  
 RG 71.8  
 DW 50.000 usec  
 DE 6.00 usec  
 TE 297.9 K  
 D1 2.0000000 sec  
 MCREST 0.0000000 sec  
 MCWRK 0.01500000 sec

===== CHANNEL f1 =====  
 NUC1 1H  
 P1 12.25 usec  
 PL1 0.00 dB  
 SFO1 500.3330020 MHz

F2 - Processing parameters  
 SI 32768  
 SF 500.3300220 MHz  
 WDW EM  
 SSB 0  
 LB 0.30 Hz  
 GB 0  
 PC 1.00

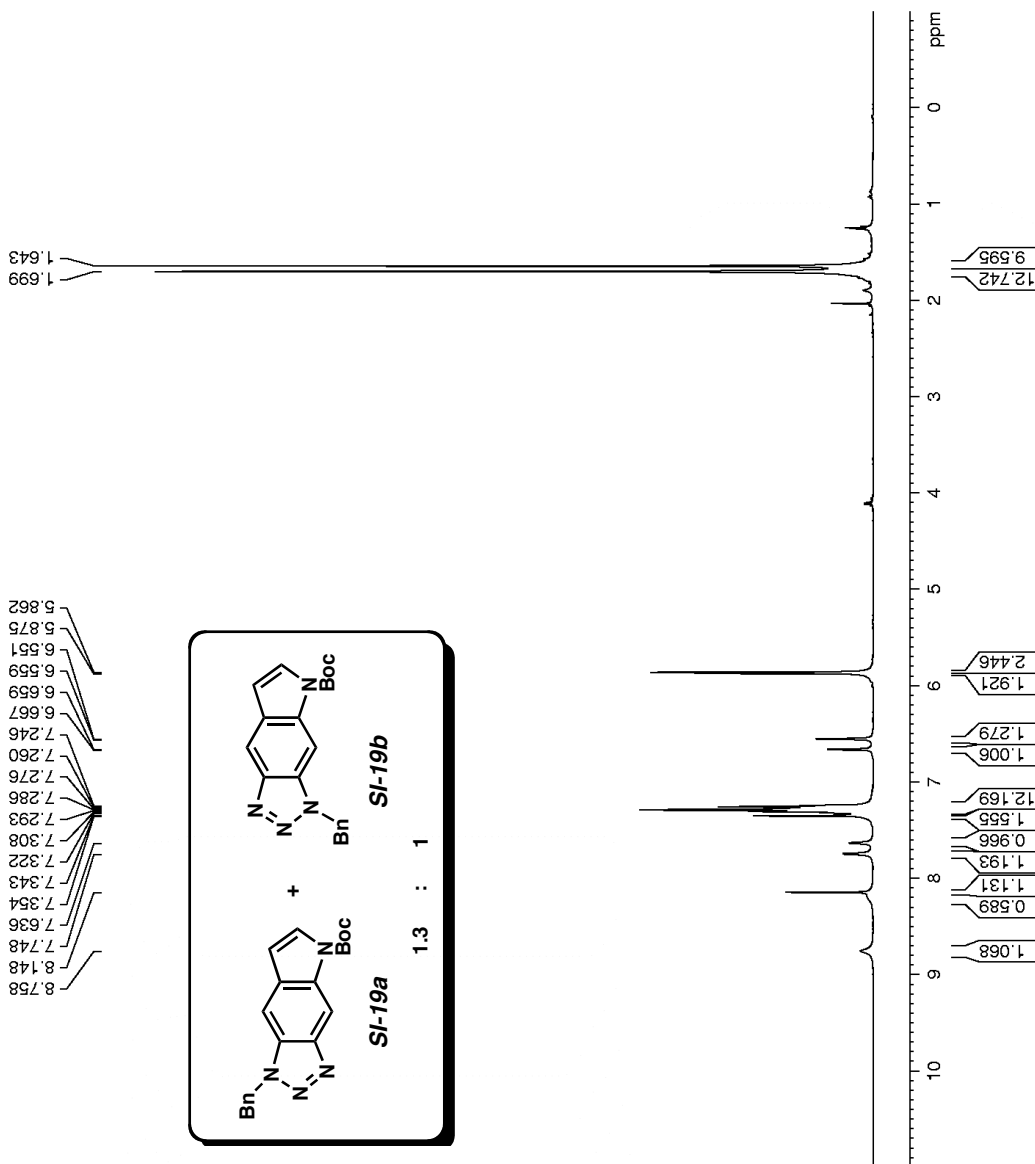

Current Data Parameters  
 NAME GJI-III-108  
 EXPNO 60  
 PROCNO 1

F2 - Acquisition Parameters  
 Date\_ 20100407  
 Time 22:37  
 INSTRUM avance500  
 PROBHD 5 mm bb-Z Z800  
 PULPROG zg30  
 TD 66536  
 SOLVENT CDCl3  
 NS 16  
 DS 0  
 SWH 10000.000 Hz  
 FIDRES 0.152588 Hz  
 AQ 3.2769001 sec  
 RG 203.2  
 DW 50.000 usec  
 DE 6.00 usec  
 TE 298.0 K  
 D1 2.0000000 sec  
 MCREST 0.0000000 sec  
 MCWRK 0.01500000 sec

===== CHANNEL f1 =====  
 NUC1 1H  
 P1 12.25 usec  
 PL1 0.00 dB  
 SFO1 500.3330020 MHz

F2 - Processing parameters  
 SI 32768  
 SF 500.3300220 MHz  
 EM  
 WDW 0  
 SSB 0  
 LB 0.30 Hz  
 GB 0  
 PC 1.00

GJI-III-108 pTLC Band 2

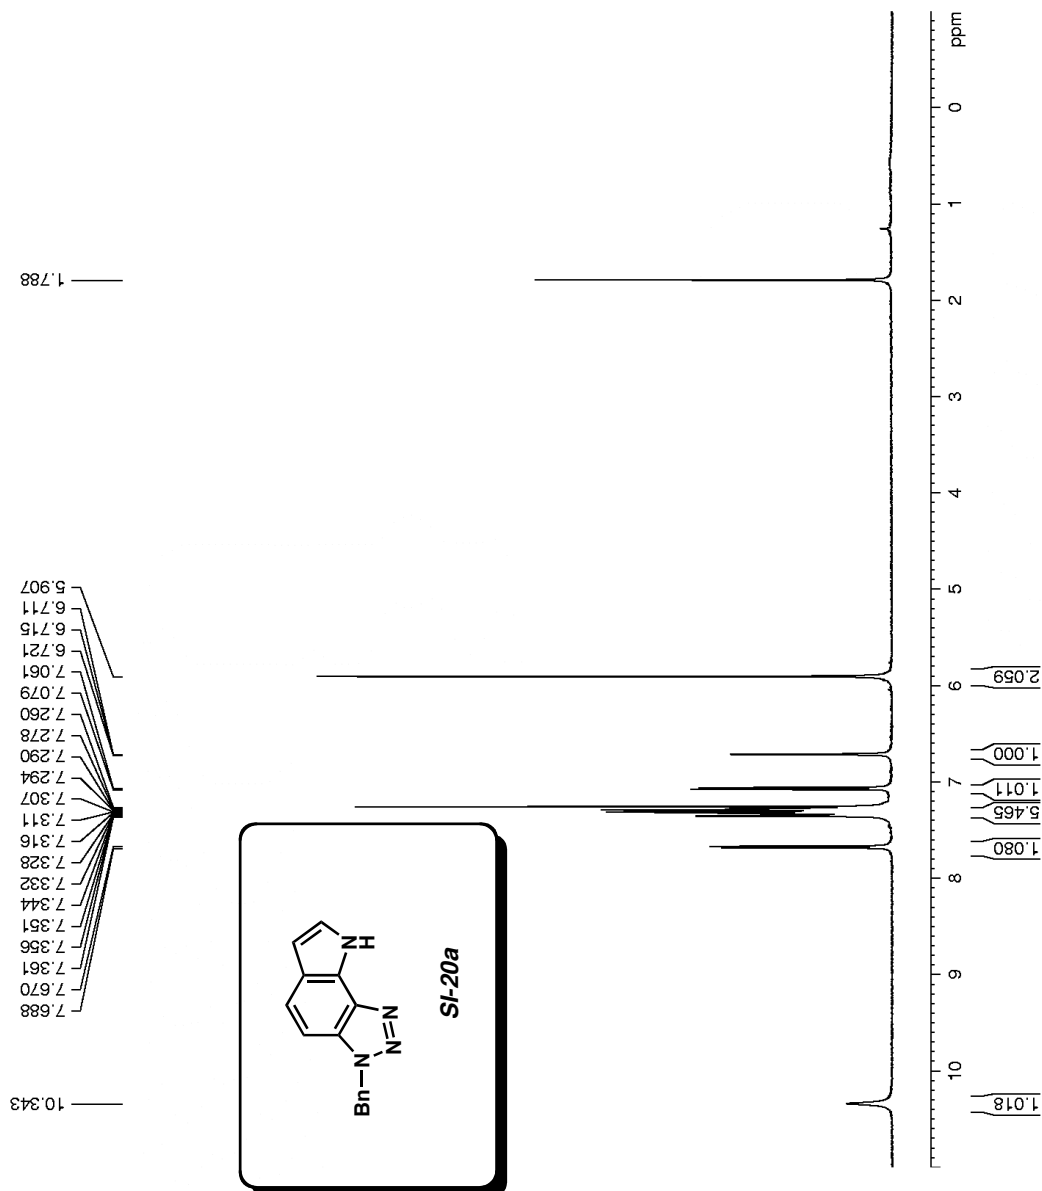

Current Data Parameters  
 NAME GJI-III-108  
 EXPNO 70  
 PROCNO 1

F2 - Acquisition Parameters  
 Date\_ 20100408  
 Time\_ 1.10  
 INSTRUM avance500  
 PROBHD 5 mm bb-Z Z800  
 PULPROG zg30  
 TD 68536  
 SOLVENT CDCl3  
 NS 32  
 DS 0  
 SWH 10000.000 Hz  
 FIDRES 0.152588 Hz  
 AQ 3.2769001 sec  
 RG 256  
 DW 50.000 usec  
 DE 6.00 usec  
 TE 298.2 K  
 D1 2.00000000 sec  
 MCREST 0.00000000 sec  
 MCWRK 0.01500000 sec

===== CHANNEL f1 =====  
 NUC1 1H  
 P1 12.25 usec  
 PL1 0.00 dB  
 SFO1 500.3330020 MHz

F2 - Processing parameters  
 SI 32768  
 SF 500.3300220 MHz  
 EM  
 WDW 0  
 SSB 0  
 LB 0.30 Hz  
 GB 0  
 PC 1.00

GJI-III-108 pTLC Band 1

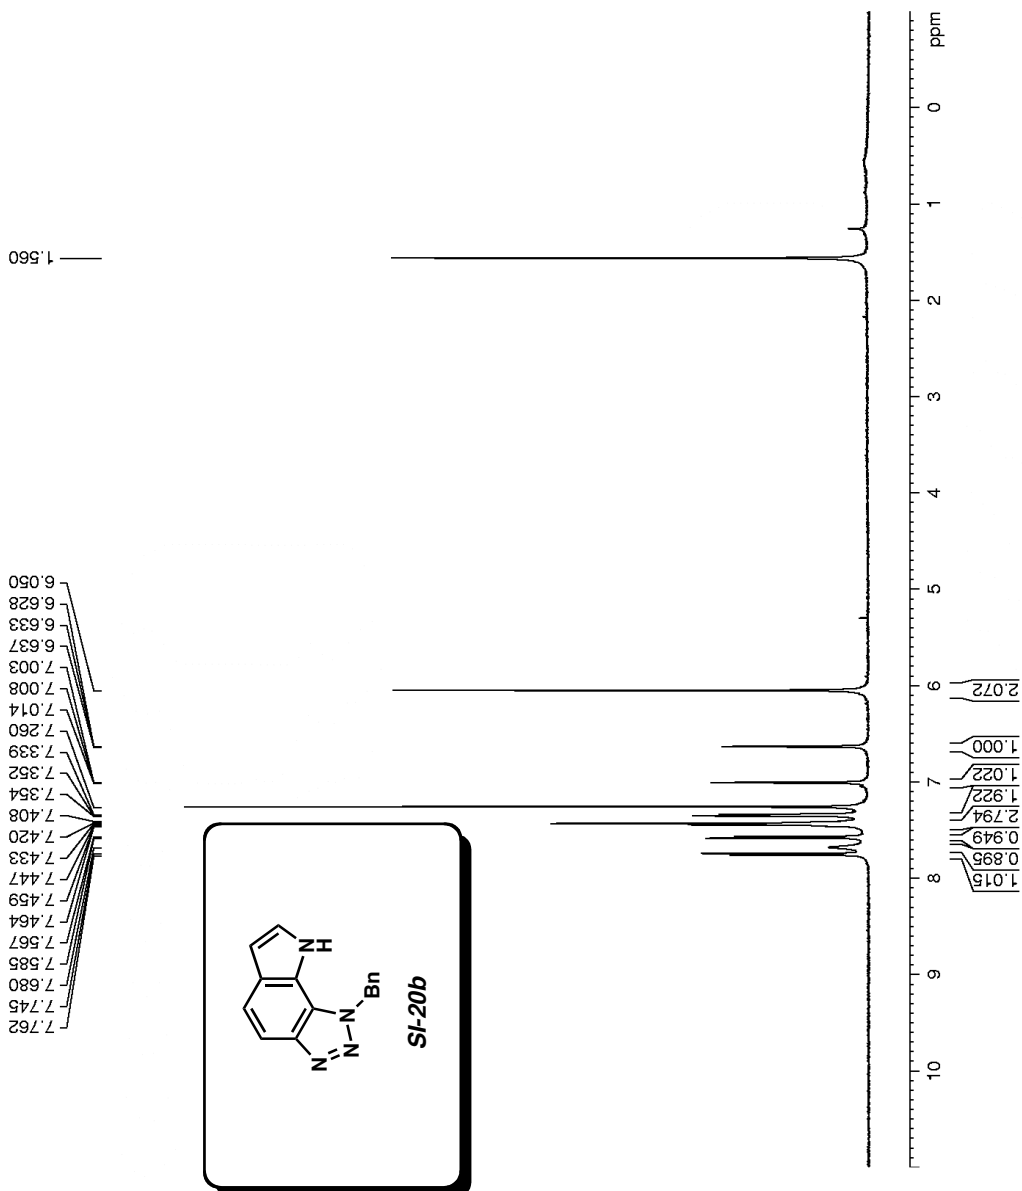

Current Data Parameters  
 NAME GJI-III-90  
 EXPNO 12  
 PROCNO 1

F2 - Acquisition Parameters  
 Date\_ 20100105  
 Time\_ 2:57  
 INSTRUM avance500  
 PROBHD 5 mm bb-Z Z800  
 PULPROG zg30  
 TD 66536  
 SOLVENT CDC13  
 NS 8  
 DS 0  
 SWH 10000.000 Hz  
 FIDRES 0.152588 Hz  
 AQ 3.2769001 sec  
 RG 143.7  
 DW 50.000 usec  
 DE 6.00 usec  
 TE 296.4 K  
 D1 2.00000000 sec  
 MCREST 0.00000000 sec  
 MCWRK 0.01500000 sec

===== CHANNEL f1 =====  
 NUC1 1H  
 P1 12.00 usec  
 PL1 0.00 dB  
 SFO1 500.3330020 MHz

F2 - Processing parameters  
 SI 32768  
 SF 500.3300220 MHz  
 WDW EM  
 SSB 0  
 LB 0.30 Hz  
 GB 0  
 PC 1.00

GJI-III-90 Band 2

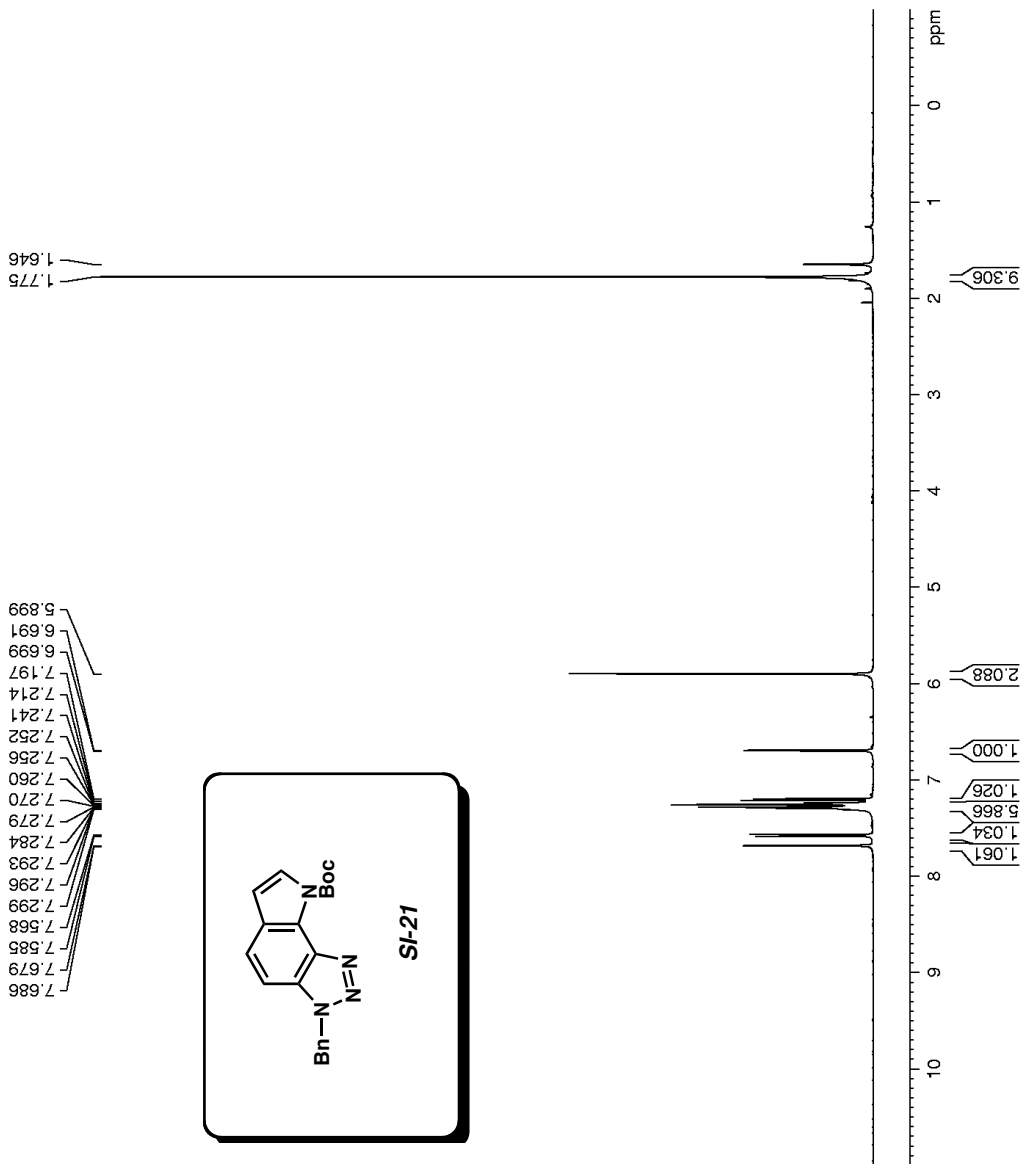

**$^{13}\text{C}$  NMR Spectra:**

Current Data Parameters  
 NAME AEG-1-217bC13  
 EXPNO 1  
 PROCNO 1

F2 - Acquisition Parameters  
 Date\_ 20100530  
 Time 18.38  
 INSTRUM aix500  
 PROBHD 5 mm broadband  
 PULPROG zgpg30  
 TD 68536  
 SOLVENT CDCl3  
 NS 102  
 DS 0  
 SWH 35714.285 Hz  
 FIDRES 0.544957 Hz  
 AQ 0.9175540 sec  
 RG 45500  
 DW 14.000 usec  
 DE 20.00 usec  
 TE 300.0 K  
 D12 0.000200 sec  
 DL5 17.70 dB  
 CPDPRG waltz16  
 P31 100.00 usec  
 D1 2.0000000 sec  
 P1 6.80 usec  
 SFO1 125.7728999 MHz  
 NUCLEUS 13C  
 D11 0.0300000 sec

F2 - Processing parameters  
 SI 32768  
 SF 125.7578090 MHz  
 WDW EM  
 SSB 0  
 LB 1.00 Hz  
 GB 0  
 PC 1.40

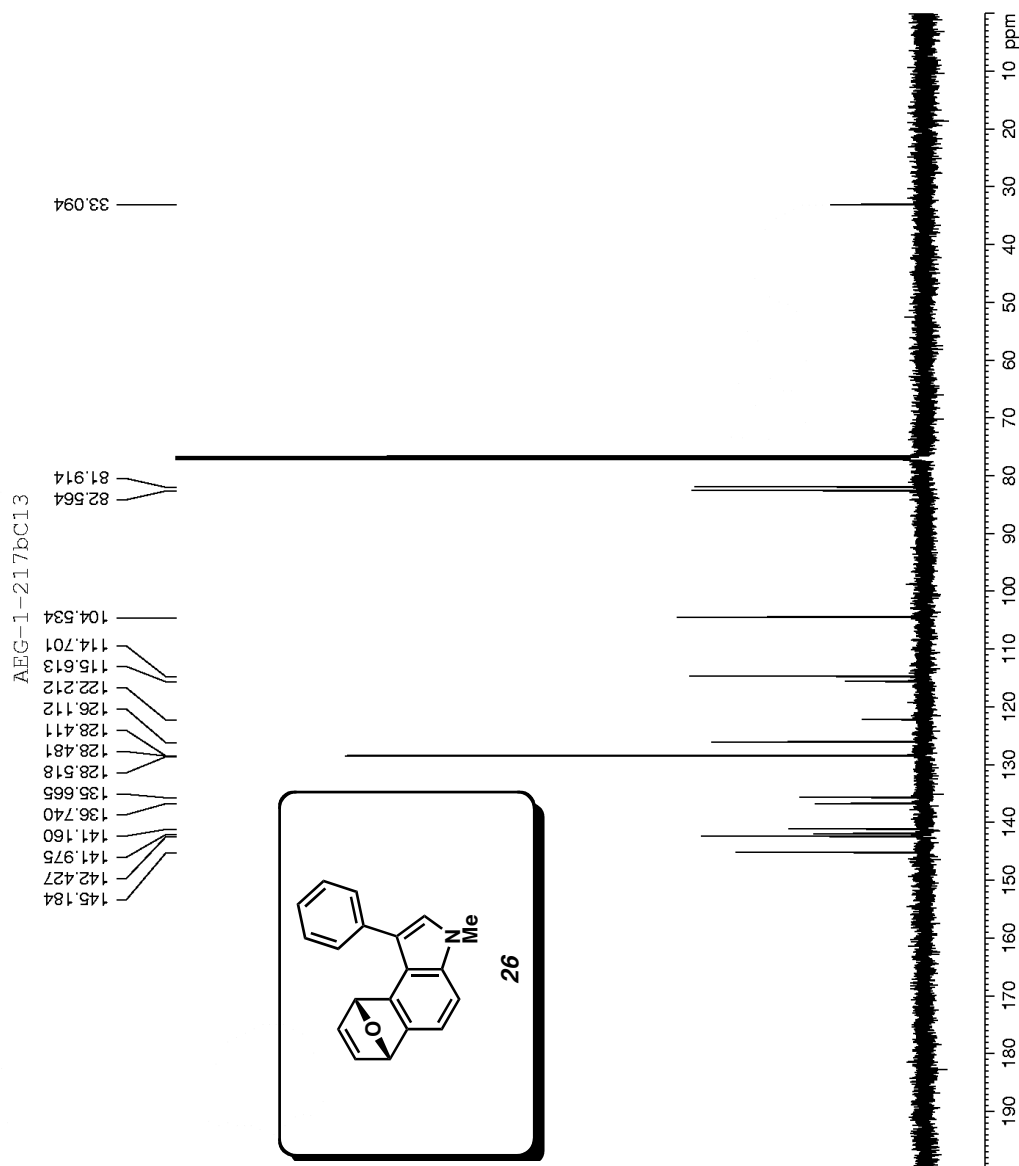

Current Data Parameters  
 NAME AEG-1-106aC13-2  
 EXPNO 1  
 PROCNO 1

F2 - Acquisition Parameters  
 Date\_ 20100502  
 Time 4.04

INSTRUM advance500  
 PROBH 5 mm bb-Z Z800  
 PULPROG zgpg30  
 TD 65536  
 SOLVENT CDCl3

NS 13630  
 DS 0

SWH 32679.738 Hz  
 FIDRES 0.498653 Hz  
 AQ 1.0027661 sec

RG 4096  
 DW 15.300 usec  
 DE 6.00 usec  
 TE 298.3 K

D1 2.00000000 sec  
 d11 0.03000000 sec  
 MCREST 0.00000000 sec

MCWRK 0.01500000 sec

===== CHANNEL f1 =====  
 NUC1 13C  
 P1 6.20 usec  
 PL1 0.00 dB  
 SFO1 125.8231939 MHz

===== CHANNEL f2 =====  
 CPDPRG2 waltz16  
 NUC2 1H  
 PCPD2 100.00 usec  
 PL2 120.00 dB  
 PL12 16.10 dB  
 SFO2 500.3320013 MHz

F2 - Processing parameters  
 SI 65536  
 SF 125.8080652 MHz  
 WDW EM  
 SSB 0  
 LB 1.00 Hz  
 GB 0  
 PC 1.40

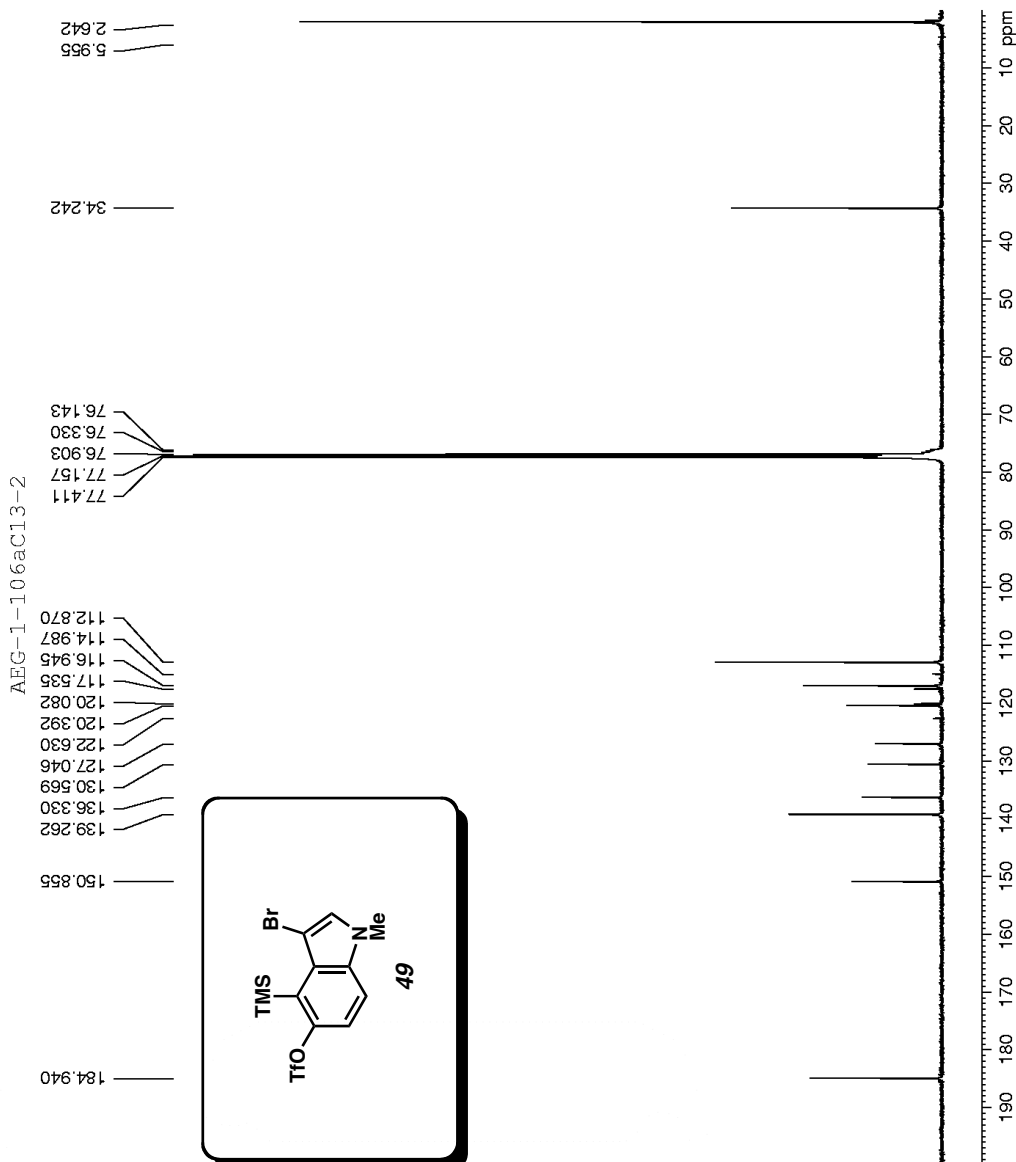



Current Data Parameters  
 NAME AEG-1-201aC13-4  
 EXPNO 1  
 PROCNO 1

F2 - Acquisition Parameters  
 Date\_ 20100513  
 Time 15.36  
 INSTRUM avance500  
 PROBHD 5 mm bb-Z Z800  
 PULPROG zgpg30  
 TD 65536  
 SOLVENT CDCl3  
 NS 3598  
 DS 0  
 SWH 32679.738 Hz  
 FIDRES 0.498653 Hz  
 AQ 1.0027661 sec  
 RG 4096  
 DW 15.300 usec  
 DE 6.00 usec  
 TE 297.9 K  
 D1 2.0000000 sec  
 d11 0.03000000 sec  
 MCREST 0.00000000 sec  
 MCWRK 0.01500000 sec

==== CHANNEL f1 =====  
 NUC1 <sup>13</sup>C  
 P1 6.20 usec  
 PL1 0.00 dB  
 SFO1 125.8231939 MHz

==== CHANNEL f2 =====  
 CPDPRG2 waltz16  
 NUC2 <sup>1</sup>H  
 PCPD2 100.00 usec  
 PL2 120.00 dB  
 PL12 16.10 dB  
 SFO2 500.3320013 MHz

F2 - Processing parameters  
 SI 65536  
 SF 125.8080969 MHz  
 WDW EM  
 SSB 0  
 LB 5.00 Hz  
 GB 0  
 PC 1.40

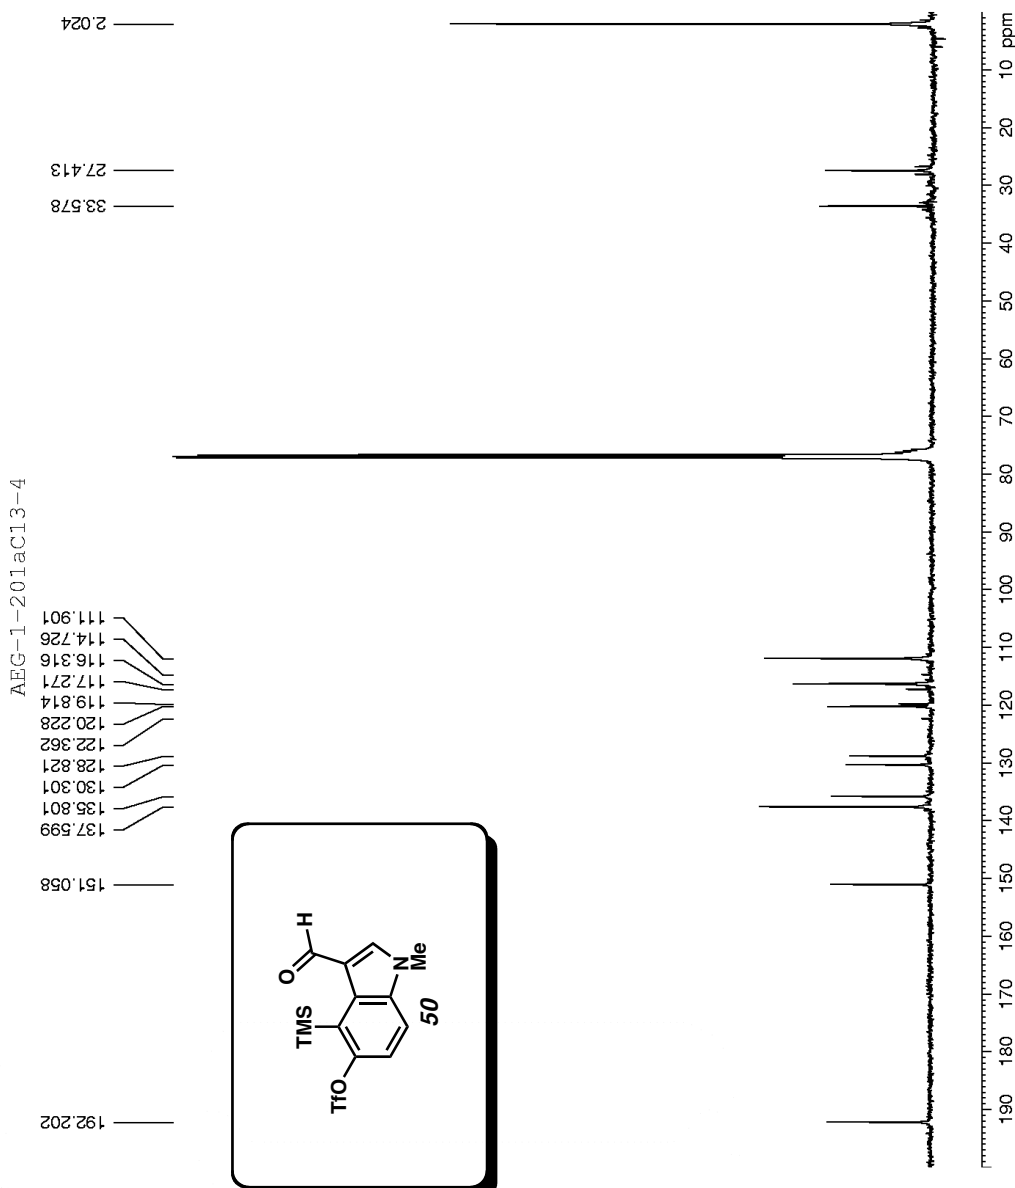

Current Data Parameters  
 NAME AEG-1-193aC13  
 EXPNO 1  
 PROCNO 1

F2 - Acquisition Parameters  
 Date\_ 20100429  
 Time 16.31  
 INSTRUM arx500  
 PROBHD 5 mm broadband  
 PULPROG zgpg30  
 TD 65536  
 SOLVENT CDCl3  
 NS 111  
 DS 0  
 SWH 35714.285 Hz  
 FIDRES 0.544957 Hz  
 AQ 0.9175540 sec  
 RG 32768  
 DW 14.000 usec  
 DE 20.00 usec  
 TE 300.0 K  
 D12 0.0000200 sec  
 DL5 17.70 dB  
 CPDPRG waltz16  
 P31 100.00 usec  
 P1 2.0000000 sec  
 P1 6.80 usec  
 SFO1 125.7728999 MHz  
 NUCLEUS 13C  
 D11 0.0300000 sec

F2 - Processing parameters  
 SI 32768  
 SF 125.7578090 MHz  
 WDW EM  
 SSB 0  
 LB 1.00 Hz  
 GB 0  
 PC 1.40

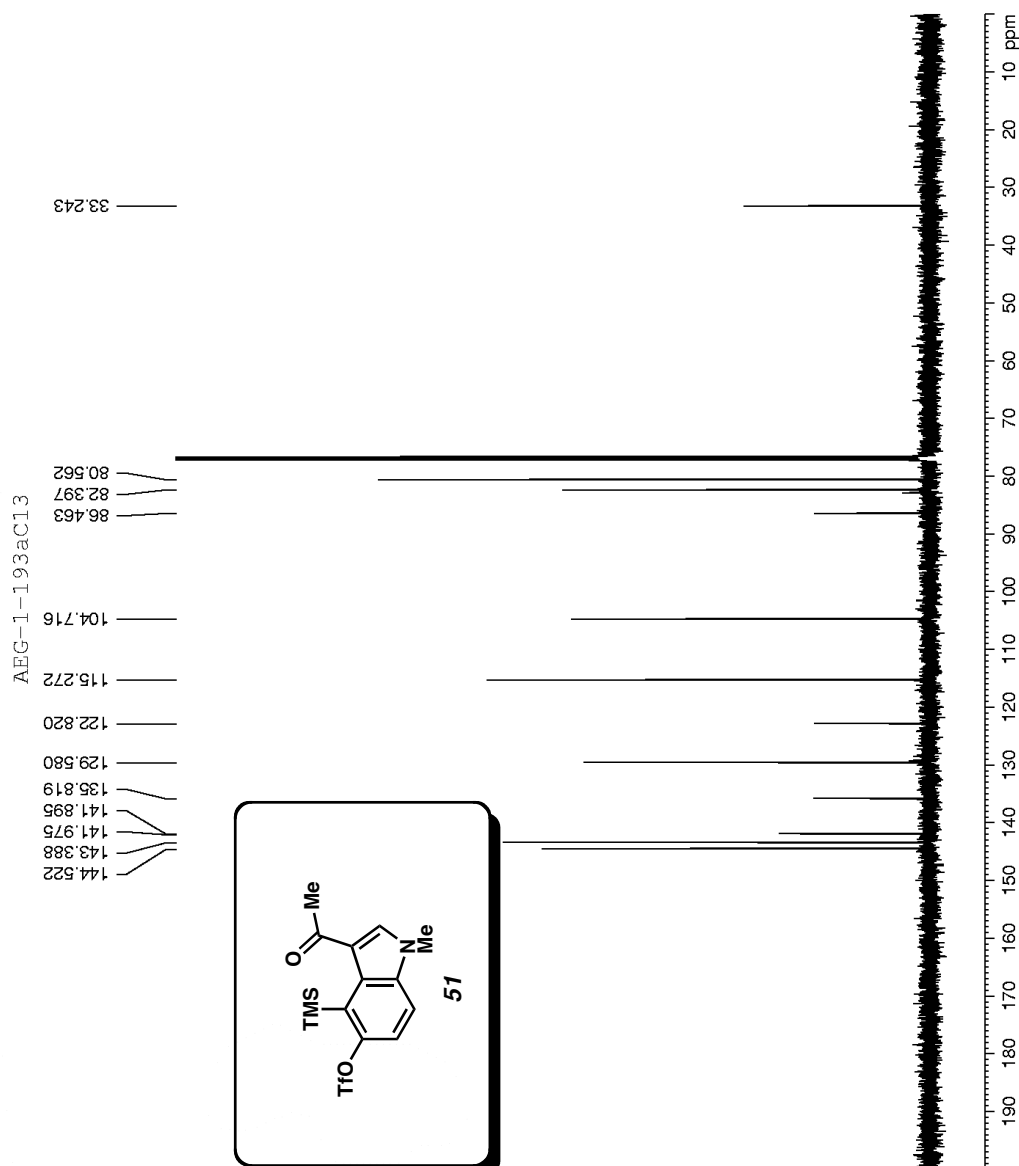

```

Current Data Parameters
NAME  AEG-1-191aC13
EXPNO  1
PROCNO  1

F2 - Acquisition Parameters
Date_  20100428
Time   0.16
INSTRUM  avance500
PROBHD  5 mm bb-Z Z800
PULPROG  zgpg30
TD      65536
SOLVENT  CDCl3
NS      247
DS      0
SWH     32679.738 Hz
FIDRES  0.498653 Hz
AQ      1.0027661 sec
RG      10321.3
DW      15.300 usec
DE      6.00 usec
TE      298.4 K
d1      2.0000000 sec
d11     0.03000000 sec
MCREST  0.00000000 sec
MCWRK   0.01500000 sec

===== CHANNEL f1 =====
NUC1    13C
P1      6.20 usec
PL1     0.00 dB
SFO1    125.8231939 MHz

===== CHANNEL f2 =====
CPDPRG2  waltz16
NUC2     1H
PCPD2    100.00 usec
PL2      120.00 dB
PL12     16.10 dB
SFO2     500.3320013 MHz

F2 - Processing parameters
SI       65536
SF       125.8080969 MHz
WDW      EM
SSB      0
LB       0.00 Hz
GB       0
PC       1.40
    
```

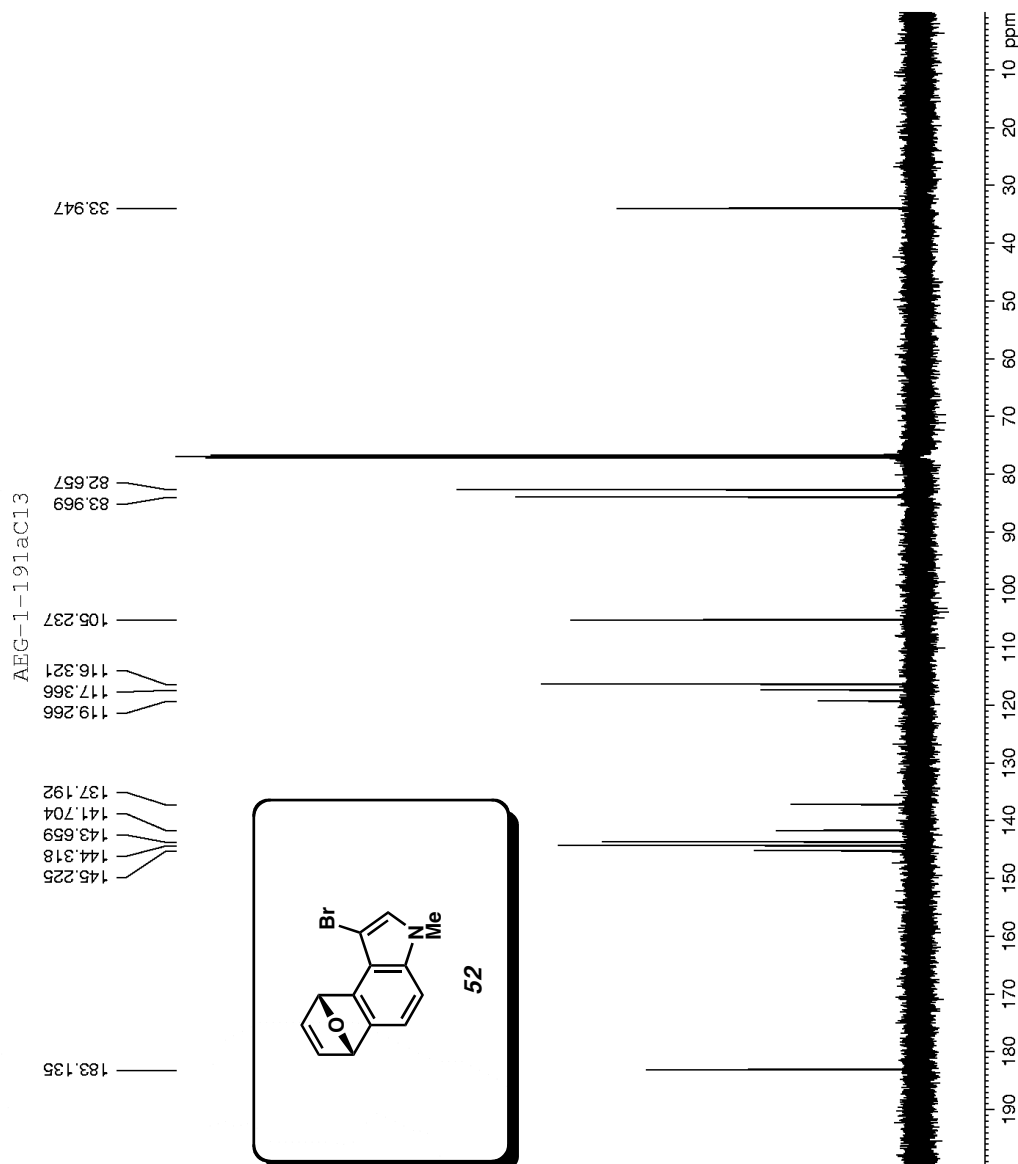

Current Data Parameters  
 NAME AEG-1-190aC13-2  
 EXPNO 1  
 PROCNO 1

F2 - Acquisition Parameters  
 Date\_ 20100426  
 Time 2.49  
 INSTRUM avance500  
 PROBHD 5 mm bb-Z Z800  
 PULPROG zgpg30  
 TD 65536  
 SOLVENT CDCl3  
 NS 194  
 DS 0  
 SWH 32679.738 Hz  
 FIDRES 0.498653 Hz  
 AQ 1.0027661 sec  
 RG 11585.2  
 DW 15.300 usec  
 DE 6.00 usec  
 TE 298.7 K  
 D1 2.00000000 sec  
 d11 0.03000000 sec  
 MCREST 0.00000000 sec  
 MCWRK 0.01500000 sec

==== CHANNEL f1 =====  
 NUC1 13C  
 P1 6.20 usec  
 PL1 0.00 dB  
 SFO1 125.8231939 MHz

==== CHANNEL f2 =====  
 CPDPRG2 waltz16  
 NUC2 1H  
 PCPD2 100.00 usec  
 PL2 120.00 dB  
 PL12 16.10 dB  
 SFO2 500.3320013 MHz

F2 - Processing parameters  
 SI 65536  
 SF 125.8080969 MHz  
 WDW EM  
 SSB 0  
 LB 1.00 Hz  
 GB 0  
 PC 1.40

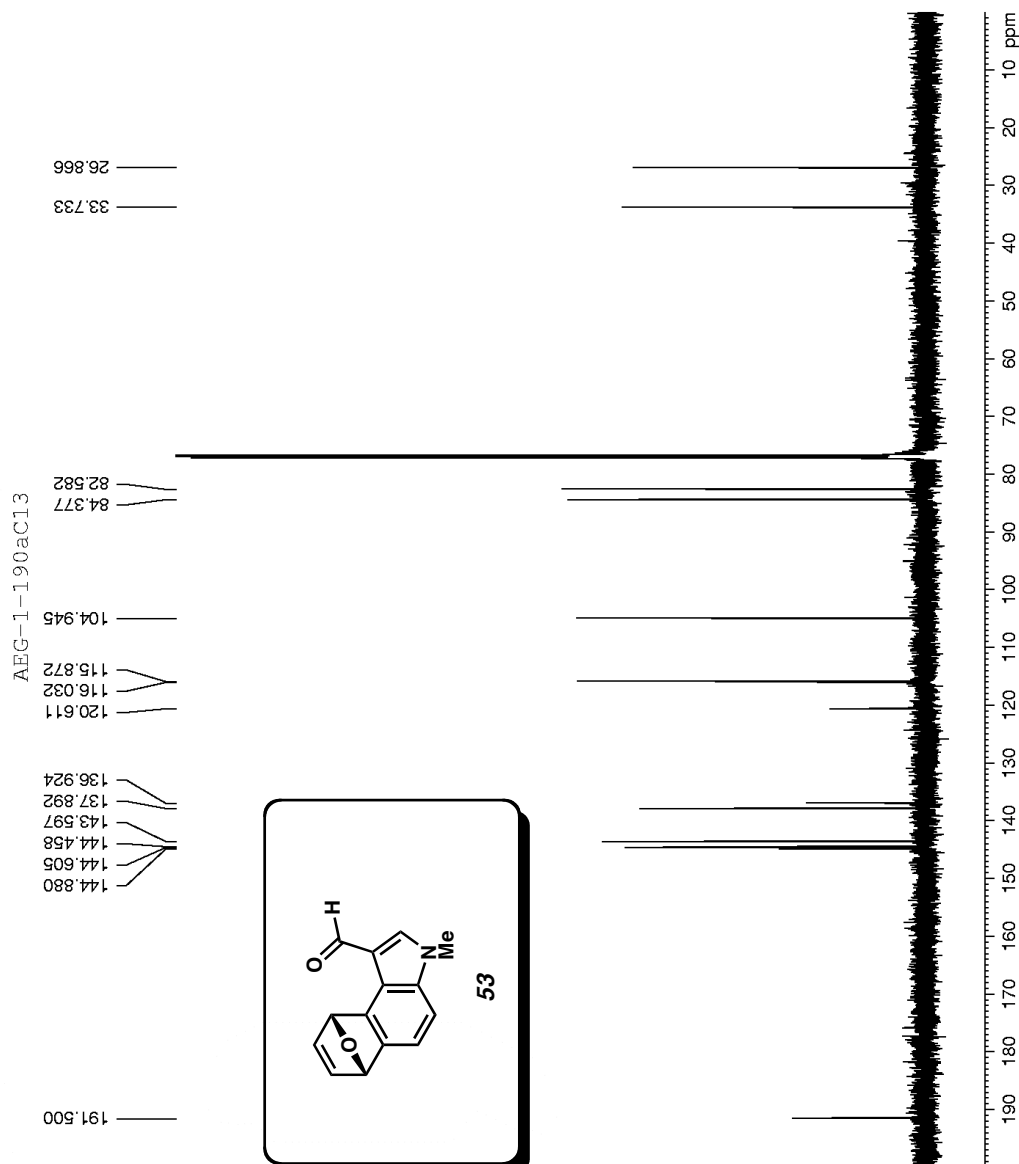

Current Data Parameters  
 NAME AEG-1-186-4c13pur  
 EXPNO 1  
 PROCNO 1

F2 - Acquisition Parameters

Date\_ 20100427  
 Time 2:13  
 INSTRUM avance500  
 PROBHD 5 mm bb-Z Z800  
 PULPROG zgpg30  
 TD 65536  
 SOLVENT CDCl3  
 NS 22237  
 DS 0  
 SWH 32679.738 Hz  
 FIDRES 0.498653 Hz  
 AQ 1.0027661 sec  
 RG 4096  
 DW 15.300 usec  
 DE 6.00 usec  
 TE 298.5 K  
 D1 2.00000000 sec  
 d11 0.03000000 sec  
 MCREST 0.00000000 sec  
 MCWRK 0.01500000 sec

==== CHANNEL f1 =====  
 NUC1 13C  
 P1 6.20 usec  
 PL1 0.00 dB  
 SFO1 125.8231939 MHz

==== CHANNEL f2 =====  
 CPDPRG2 waltz16  
 NUC2 1H  
 PCPD2 100.00 usec  
 PL2 120.00 dB  
 PL12 16.10 dB  
 SFO2 500.3320013 MHz

F2 - Processing parameters  
 SI 65536  
 SF 125.8080706 MHz  
 WDW EM  
 SSB 0  
 LB 0.00 Hz  
 GB 0  
 PC 1.40

AEG-1-186-4c13pure

149.986  
 149.977  
 149.967  
 142.303  
 136.959  
 136.246  
 127.806  
 127.796  
 122.606  
 120.061  
 117.516  
 114.980  
 114.971  
 111.642

33.352  
 25.101  
 2.199

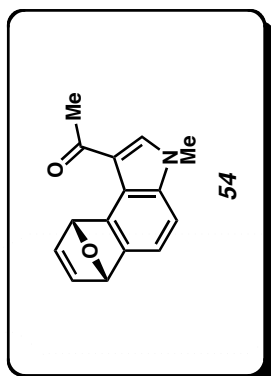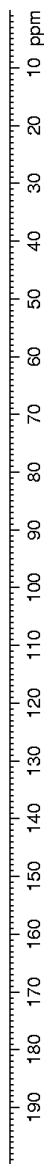

Current Data Parameters  
 NAME AEG-1-214bC13  
 EXPNO 1  
 PROCNO 1

F2 - Acquisition Parameters  
 Date\_ 20100527  
 Time 15:33  
 INSTRUM avance500  
 PROBHD 5 mm bb-Z Z800  
 PULPROG zgpg30  
 TD 65536  
 SOLVENT CDCl3  
 NS 1901  
 DS 0  
 SWH 32679.738 Hz  
 FIDRES 0.498653 Hz  
 AQ 1.0027661 sec  
 RG 9195.2  
 DW 15.300 usec  
 DE 6.00 usec  
 TE 297.6 K  
 D1 2.0000000 sec  
 d11 0.0300000 sec  
 MCREST 0.0000000 sec  
 MCWRK 0.01500000 sec

==== CHANNEL f1 =====  
 NUC1 13C  
 P1 6.20 usec  
 PL1 0.00 dB  
 SFO1 125.8231939 MHz

==== CHANNEL f2 =====  
 CPDPRG2 waltz16  
 NUC2 1H  
 PCPD2 100.00 usec  
 PL2 120.00 dB  
 PL12 16.10 dB  
 SFO2 500.3320013 MHz

F2 - Processing parameters  
 SI 65536  
 SF 125.8080969 MHz  
 WDW EM  
 SSB 0  
 LB 1.00 Hz  
 GB 0  
 PC 1.40

AEG-1-214bC13

150.406  
 137.354  
 135.571  
 131.317  
 130.920  
 128.995  
 128.479  
 126.445  
 125.909  
 122.440  
 120.545  
 119.896  
 117.351  
 114.807  
 114.697  
 111.797

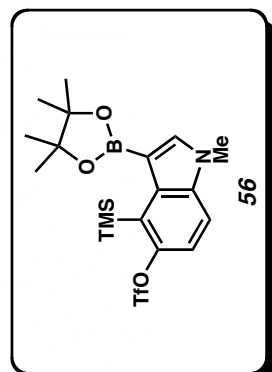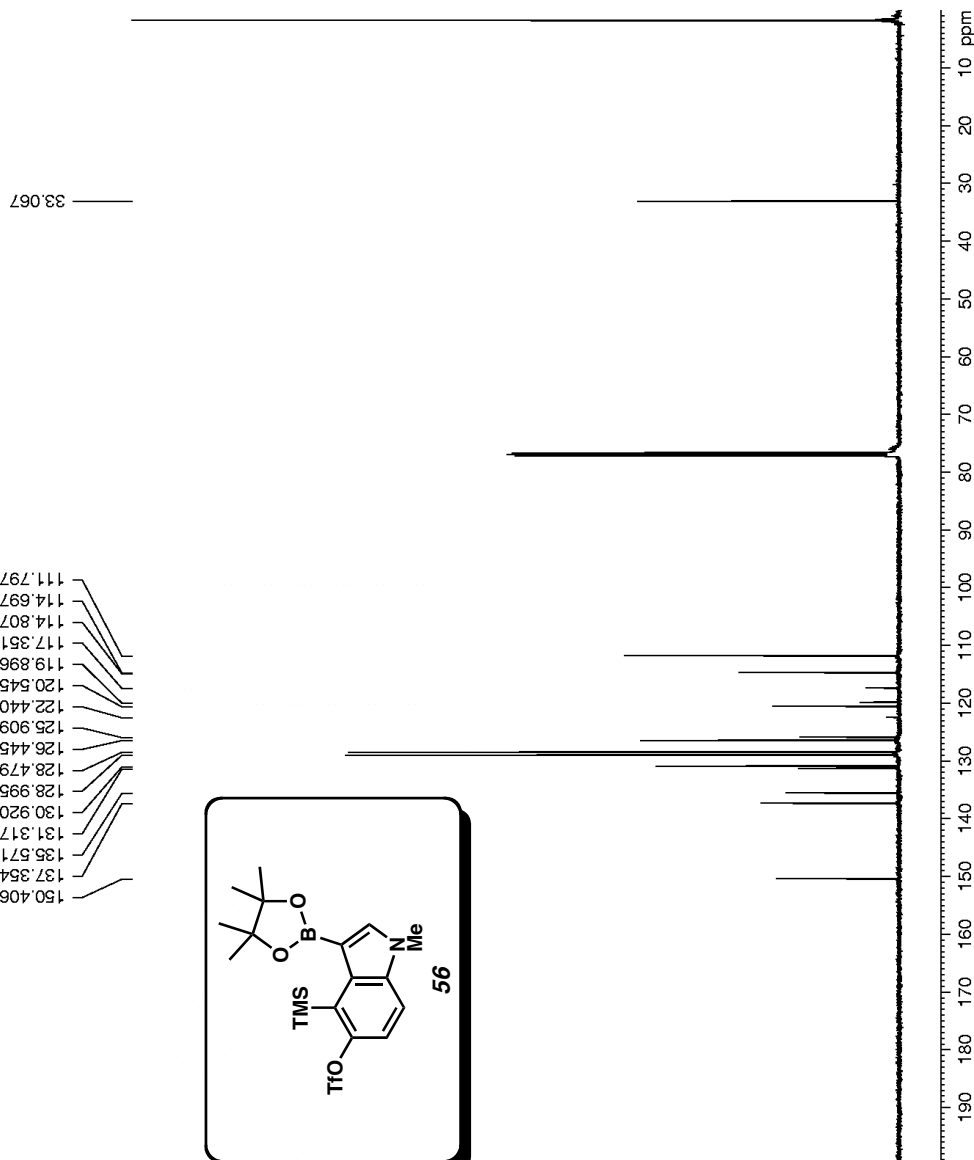

```

Current Data Parameters
NAME      GJI-II-275
EXPNO    11
PROCNO   1

F2 - Acquisition Parameters
Date_    20100507
Time     1.44
INSTRUM  avance500
PROBHD   5 mm bb-Z Z800
PULPROG  zgpg30
TD       65536
SOLVENT  CDCl3
NS       128
DS       0
SWH      32679.738 Hz
FIDRES   0.498653 Hz
AQ       1.0027661 sec
RG       9195.2
DW       15.300 usec
DE       6.00 usec
TE       298.7 K
D1       2.0000000 sec
d11      0.0300000 sec
MCREST   0.0000000 sec
MCWRK    0.01500000 sec

===== CHANNEL f1 =====
NUC1     13C
P1       6.20 usec
PL1      0.00 dB
SFO1    125.8231939 MHz

===== CHANNEL f2 =====
CPDPRG2  waltz16
NUC2     1H
PCPD2    100.00 usec
PL2      120.00 dB
PL12     16.10 dB
SFO2    500.3320013 MHz

F2 - Processing parameters
SI       65536
SF       125.8080969 MHz
WDW      EM
SSB      0
LB       1.00 Hz
GB       0
PC       1.40
    
```

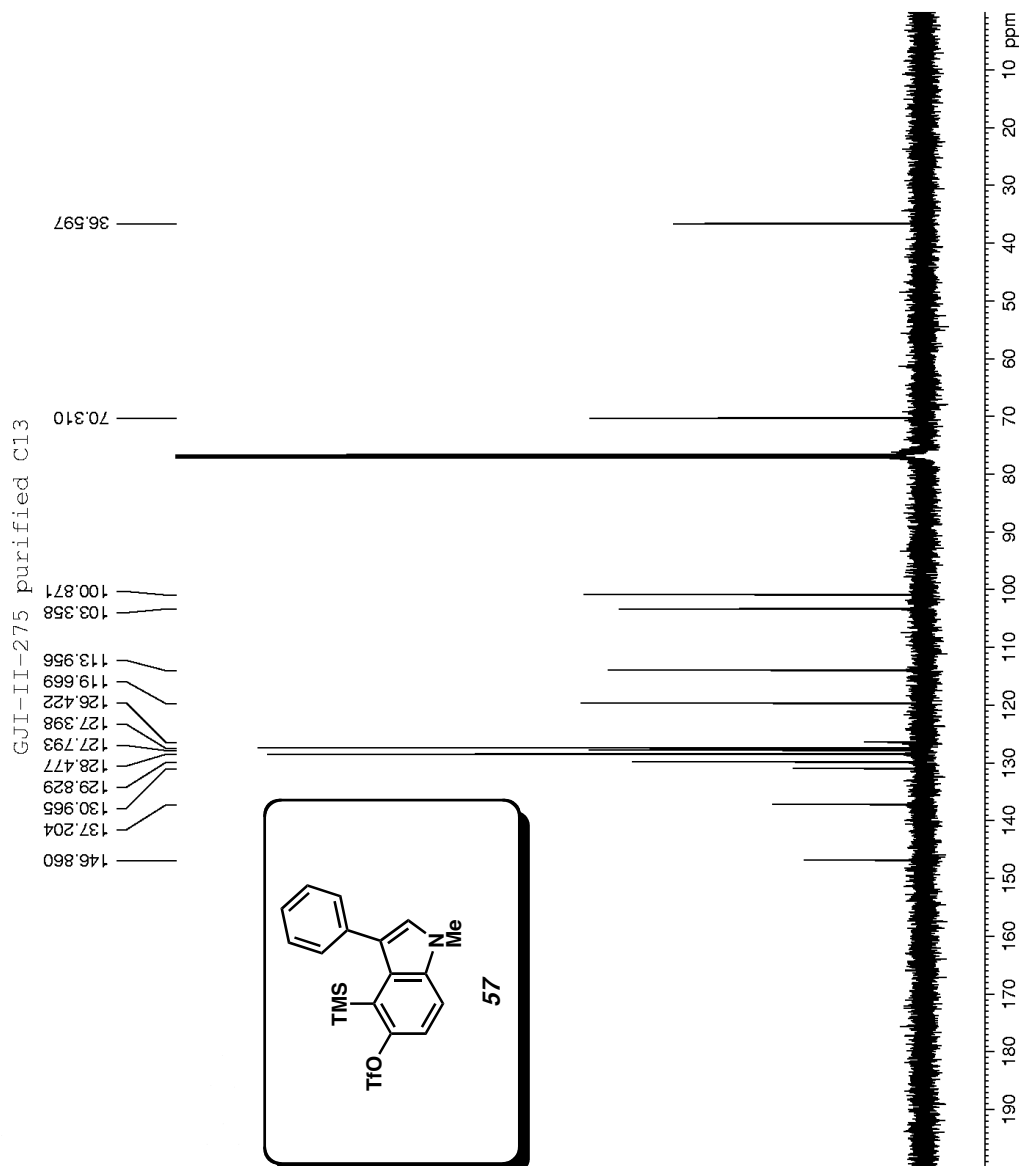

Current Data Parameters  
 NAME AEG-1-166aC13  
 EXPNO 1  
 PROCNO 1

F2 – Acquisition Parameters  
 Date\_ 20100404  
 Time 11.27  
 INSTRUM aix500  
 PROBHD 5 mm broadband  
 PULPROG zgpg30  
 TD 68536  
 SOLVENT CDCl3  
 NS 256  
 DS 0  
 SWH 35714.285 Hz  
 FIDRES 0.544957 Hz  
 AQ 0.9175540 sec  
 RG 16384  
 DW 14.000 usec  
 DE 20.00 usec  
 TE 300.0 K  
 D12 0.000200 sec  
 DL5 17.70 dB  
 CPDPRG waltz16  
 P31 100.00 usec  
 D1 2.0000000 sec  
 P1 6.80 usec  
 SFO1 125.7728999 MHz  
 NUCLEUS 13C  
 D11 0.0300000 sec

F2 – Processing parameters  
 SI 32768  
 SF 125.7578090 MHz  
 WDW EM  
 SSB 0  
 LB 1.00 Hz  
 GB 0  
 PC 1.40

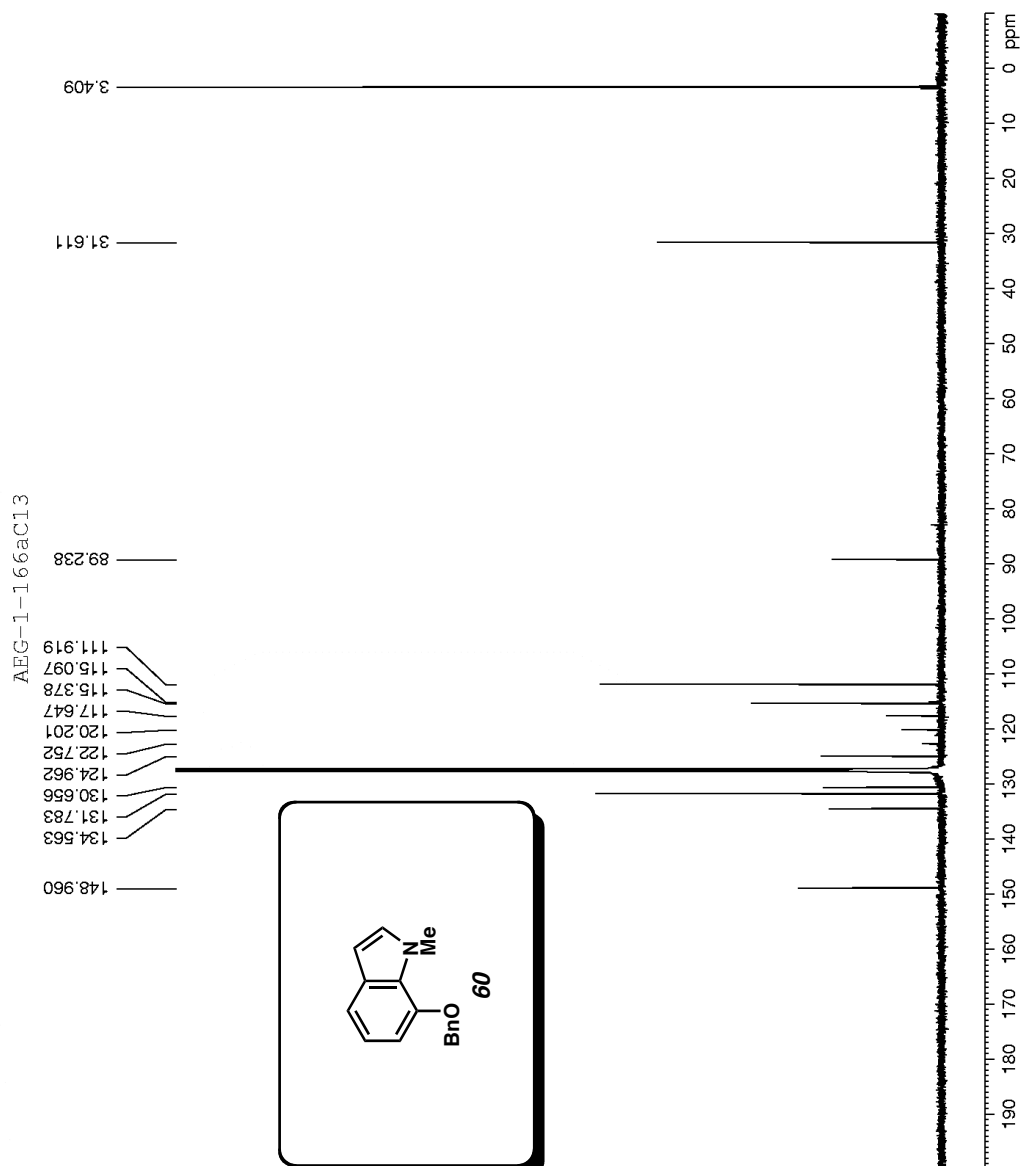



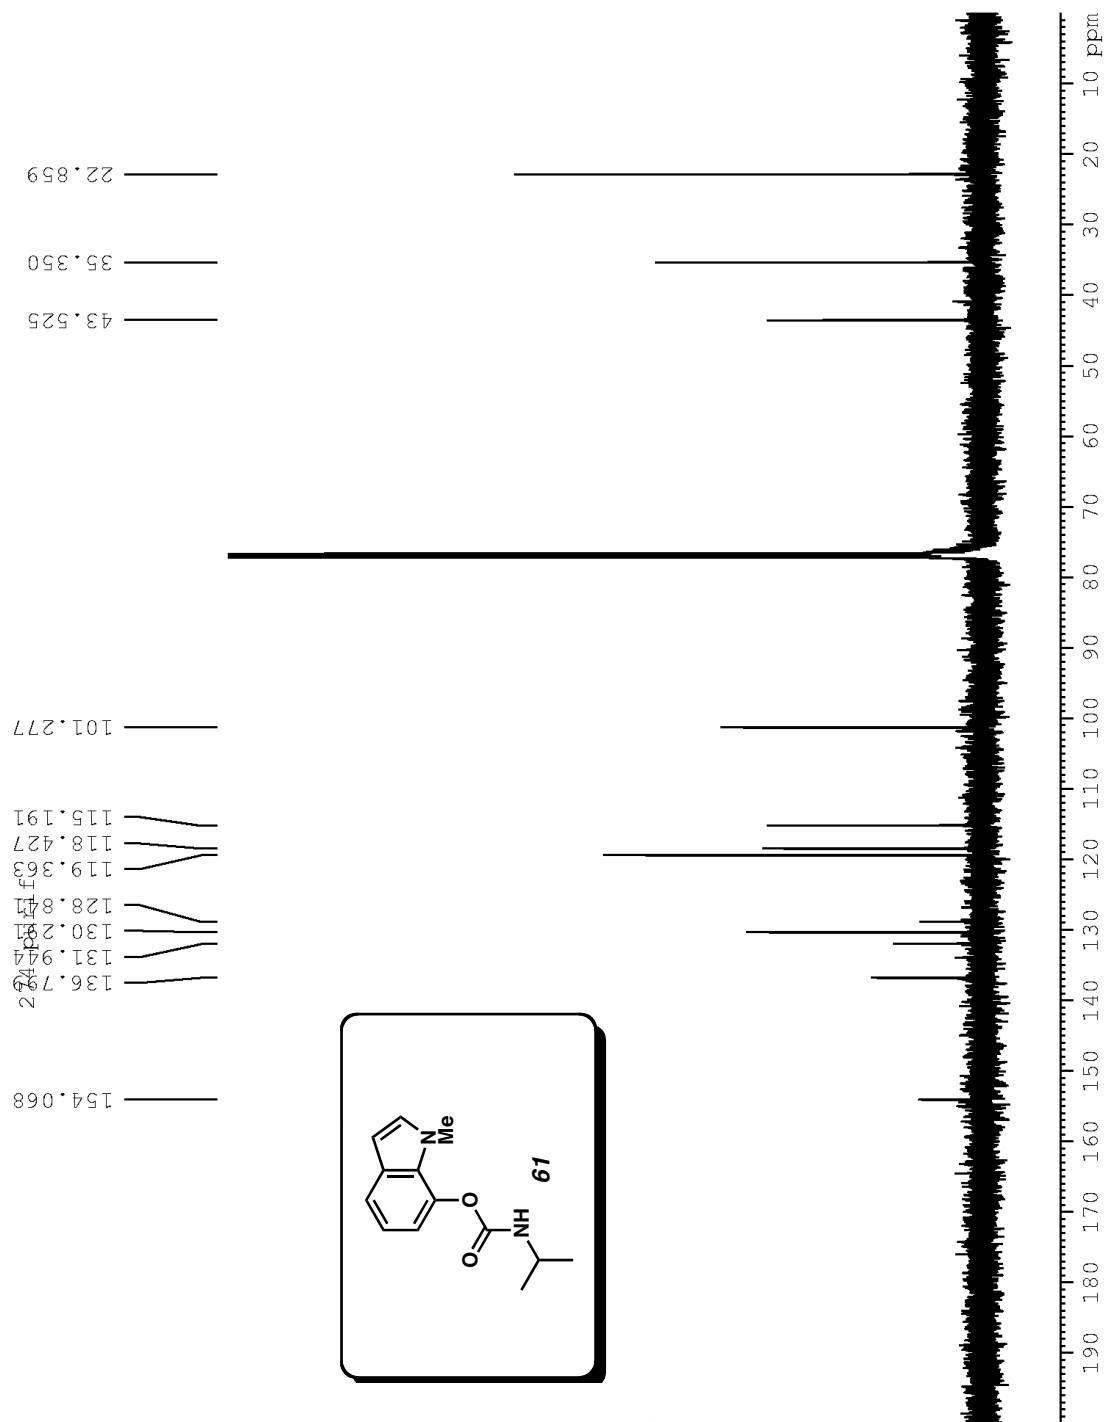

```

Current Data Parameters
NAME smb-3-184catbon
EXPNO 2
PROCNO 1

F2 - Acquisition Parameters
Date_ 20100429
Time_ 19.29
INSTRUM avance500
PROBHD 5 mm bb-ZZ800
PULPROG zgpg30
TD 65536
SOLVENT CDCI3
NS 137
DS 0
SWH 32679.738 Hz
FIDRES 0.498653 Hz
AQ 1.0027661 sec
RG 5160.6
DW 15.300 usec
DE 6.00 usec
TE 298.0 K
D1 2.0000000 sec
d11 0.030000000 sec
MCREST 0.000000000 sec
MCWRK 0.015000000 sec

===== CHANNEL f1 =====
NUC1 13C
P1 6.20 usec
PL1 0.00 dB
SFO1 125.8231939 MHz

===== CHANNEL f2 =====
CPDPRG2 waltz16
NUC2 1H
PCPD2 100.00 usec
PL2 120.00 dB
PL12 16.10 dB
SFO2 500.3320013 MHz

F2 - Processing parameters
SI 65536
SF 125.8080663 MHz
WDW EM
SSB 0
LB 1.00 Hz
GB 0
PC 1.40
    
```

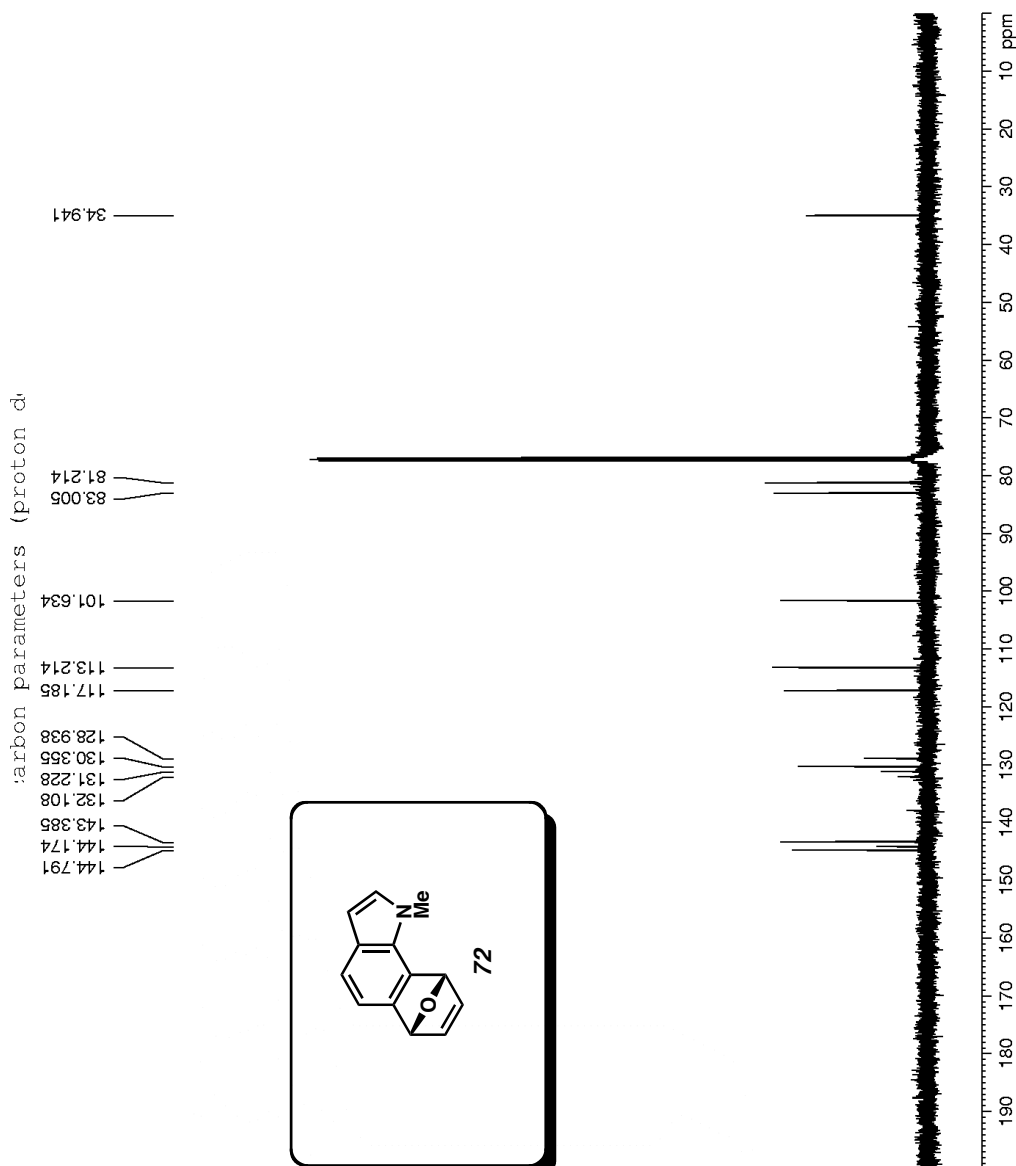

Current Data Parameters  
 NAME smb-3-188carbo  
 EXPNO 1  
 PROCNO 1

F2 - Acquisition Parameters  
 Date\_ 20100502  
 Time 19.16  
 INSTRUM aix500  
 PROBHD 5 mm broadband  
 PULPROG zgpg30  
 TD 66536  
 SOLVENT CDCl3  
 NS 131  
 DS 0  
 SWH 35714.285 Hz  
 FIDRES 0.544957 Hz  
 AQ 0.9175540 sec  
 RG 16384  
 DW 14.000 usec  
 DE 20.00 usec  
 TE 300.0 K  
 D12 0.000200 sec  
 DL5 17.70 dB  
 CPDPRG waltz16  
 P31 100.00 usec  
 P1 2.0000000 sec  
 P1 6.80 usec  
 SFO1 125.7728999 MHz  
 NUCLEUS 13C  
 D11 0.0300000 sec

F2 - Processing parameters  
 SI 32768  
 SF 125.7577864 MHz  
 WDW EM  
 SSB 0  
 LB 1.00 Hz  
 GB 0  
 PC 1.40

Chemical shift values (ppm):

153.490  
 137.960  
 136.053  
 132.063  
 132.045  
 128.609  
 127.828  
 127.665  
 114.567  
 112.088  
 104.730  
 103.727  
 70.748

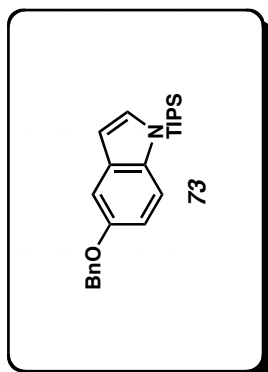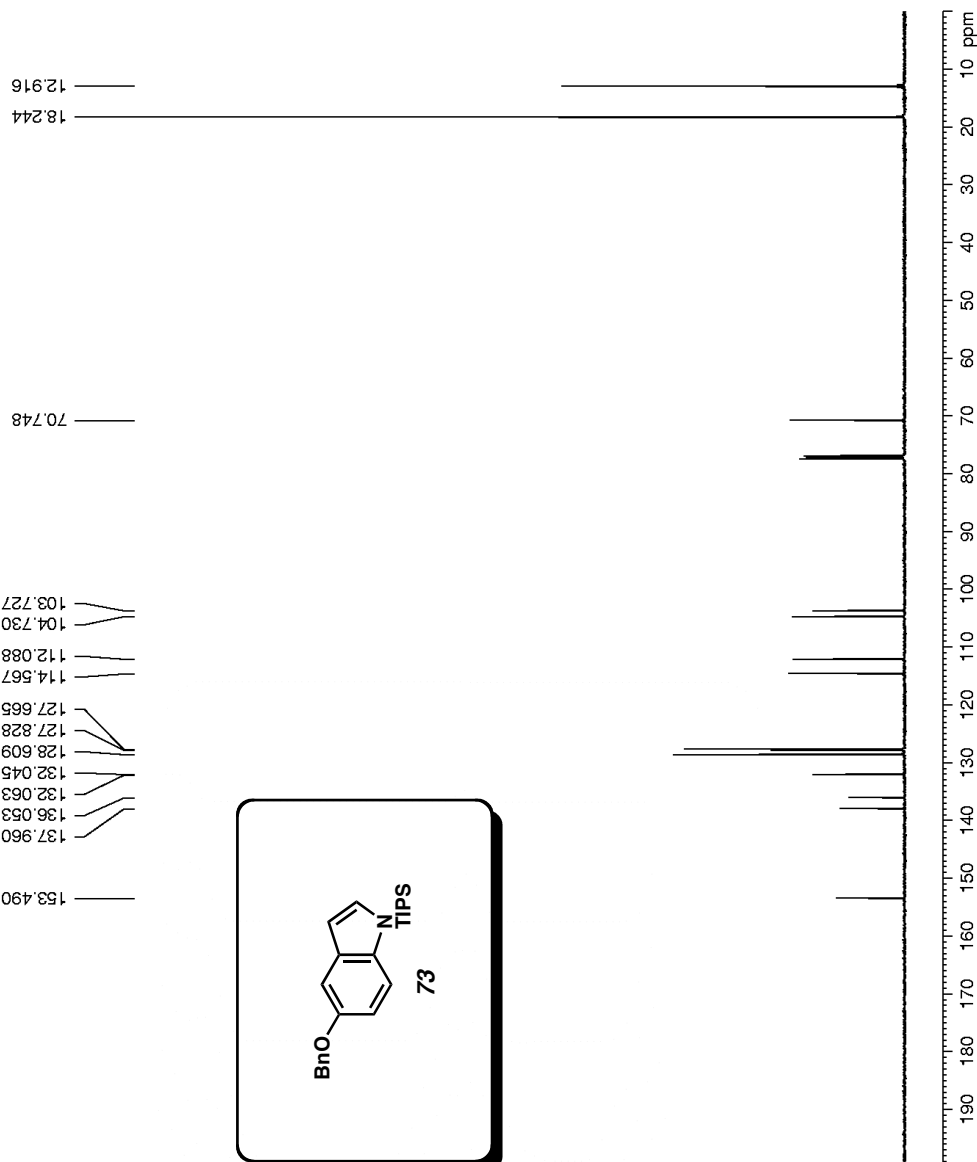

```

Current Data Parameters
NAME      kbb-81-1
EXPNO    2
PROCNO   1

F2 - Acquisition Parameters
Date_    20080224
Time     17.26
INSTRUM  avance500
PROBHD   5 mm bb-Z Z800
PULPROG  zgpg30
TD        68536
SOLVENT  CDCl3
NS        176
DS         0
SWH       32679.738 Hz
FIDRES    0.498653 Hz
AQ         1.0027661 sec
RG         4096
DW         15.300 usec
DE         6.00 usec
TE         296.1 K
D1         2.0000000 sec
d11        0.0300000 sec
MCREST    0.0000000 sec
MCWRK     0.01500000 sec

===== CHANNEL f1 =====
NUC1      13C
P1         5.25 usec
PL1        0.00 dB
SFO1      125.8231939 MHz

===== CHANNEL f2 =====
CPDPRG2   waltz16
NUC2       1H
PCPD2     100.00 usec
PL2        120.00 dB
PL12       16.10 dB
SFO2      500.3320013 MHz

F2 - Processing parameters
SI         65536
SF         125.8080421 MHz
WDW        EM
SSB         0
LB          0
GB          0
PC         1.40
    
```

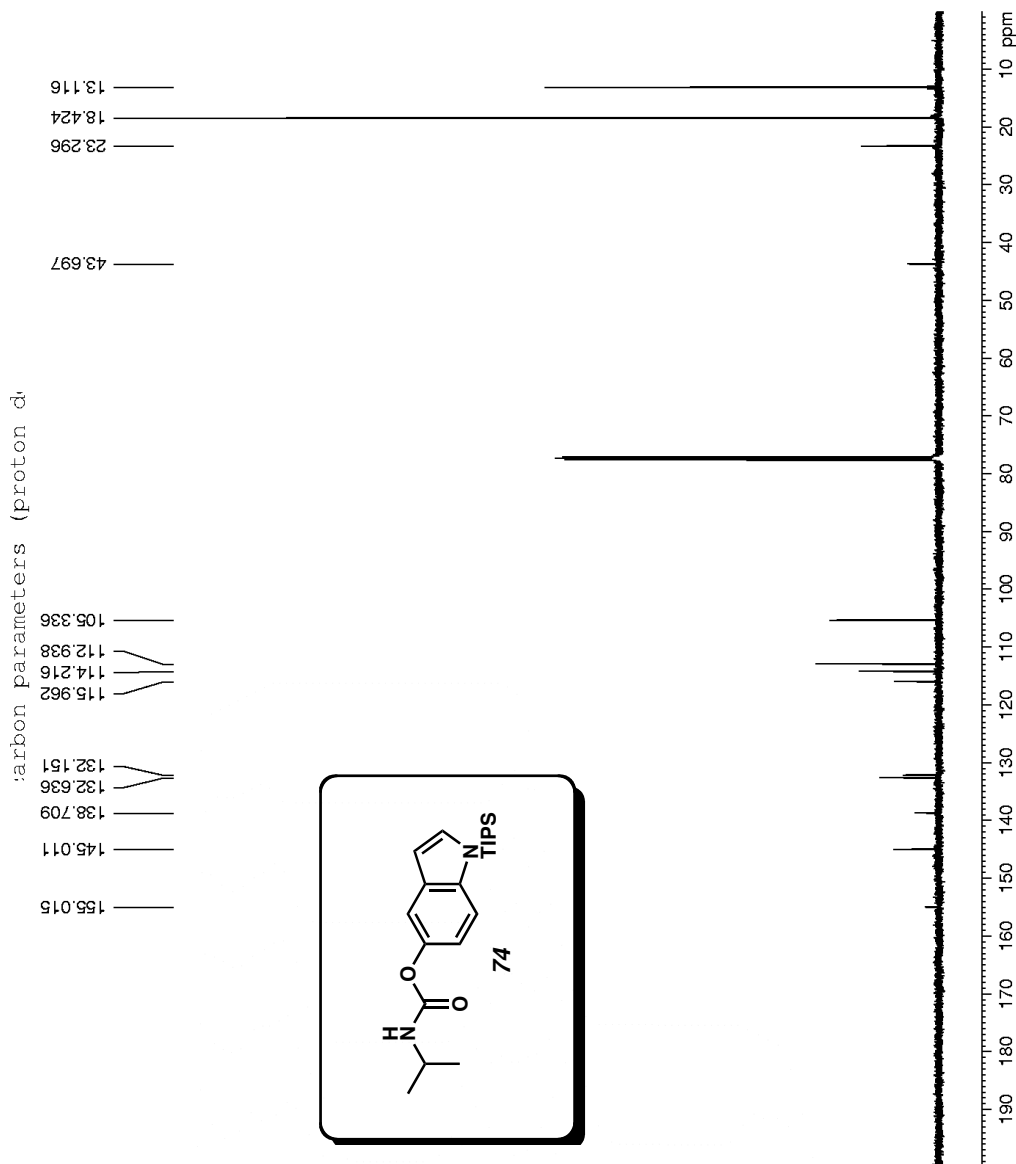

```

Current Data Parameters
NAME      Kbb-108-1
EXPNO    2
PROCNO   1

F2 - Acquisition Parameters
Date_    20080312
Time     0.53
INSTRUM  avance500
PROBHD   5 mm bb-Z Z800
PULPROG  zgpg30
TD        65536
SOLVENT  CDCl3
NS        128
DS        0
SWH       32679.738 Hz
FIDRES    0.498653 Hz
AQ         1.0027661 sec
RG         1625.5
DW         15.300 usec
DE         6.00 usec
TE         296.3 K
D1         2.0000000 sec
d11        0.0300000 sec
MCREST    0.0000000 sec
MCWRK     0.01500000 sec

===== CHANNEL f1 =====
NUC1      13C
P1         5.25 usec
PL1        0.00 dB
SFO1      125.8231939 MHz

===== CHANNEL f2 =====
CPDPRG2   waltz16
NUC2       1H
PCPD2     100.00 usec
PL2        120.00 dB
PL12       16.10 dB
SFO2       500.3320013 MHz

F2 - Processing parameters
SI         65536
SF         125.8080472 MHz
WDW        EM
SSB        0
LB         1.00 Hz
GB         0
PC         1.40
    
```

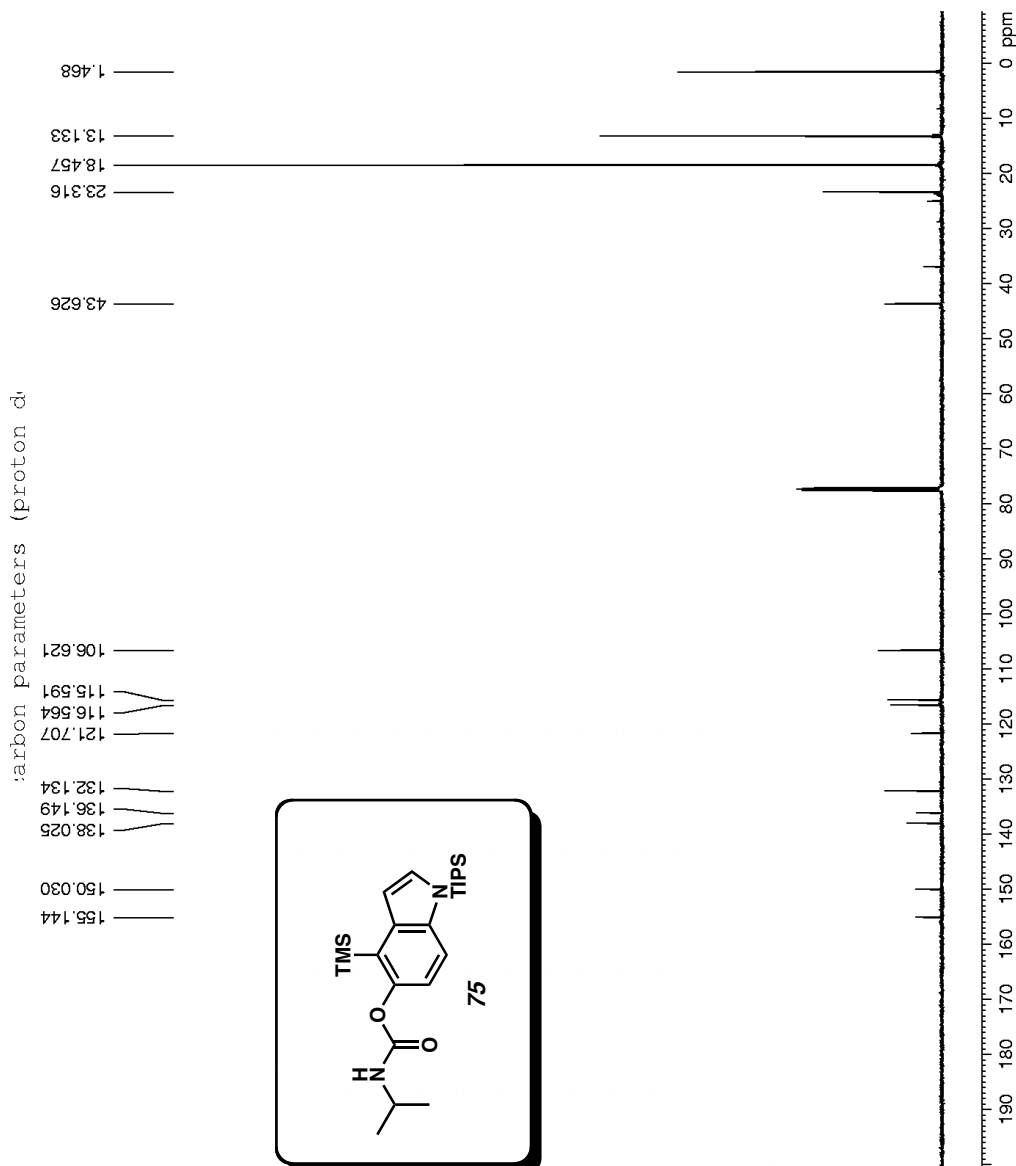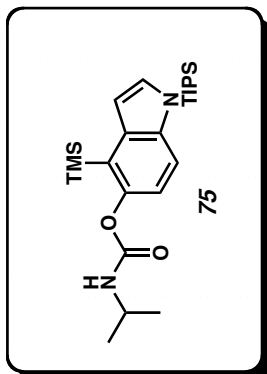

Current Data Parameters  
 NAME smb-2-196carbon2  
 EXPNO 2  
 PROCNO 1

F2 - Acquisition Parameters

Date\_ 20100520  
 Time 22.08  
 INSTRUM avance500  
 PROBHD 5 mm bb-Z Z800  
 PULPROG zgpg30  
 TD 68536  
 SOLVENT CDCl3  
 NS 1213  
 DS 0  
 SWH 32679.738 Hz  
 FIDRES 0.498653 Hz  
 AQ 1.0027661 sec  
 RG 4096  
 DW 15.300 usec  
 DE 6.00 usec  
 TE 297.9 K  
 D1 2.0000000 sec  
 d11 0.0300000 sec  
 MCREST 0.0000000 sec  
 MCWRK 0.01500000 sec

==== CHANNEL f1 =====

NUC1 13C  
 P1 6.20 usec  
 PL1 0.00 dB  
 SFO1 125.8231939 MHz

==== CHANNEL f2 =====

CPDPRG2 waltz16  
 NUC2 1H  
 PCPD2 100.00 usec  
 PL2 0.00 dB  
 PL12 16.10 dB  
 SFO2 500.3320013 MHz

F2 - Processing parameters

SI 65536  
 SF 125.8080636 MHz  
 WDW EM  
 SSB 0  
 LB 1.00 Hz  
 GB 0  
 PC 1.40

:carbon parameters (proton d)

149.176  
 138.761  
 136.446  
 133.306  
 123.145  
 122.670  
 120.123  
 117.576  
 115.800  
 115.029  
 113.598  
 107.157

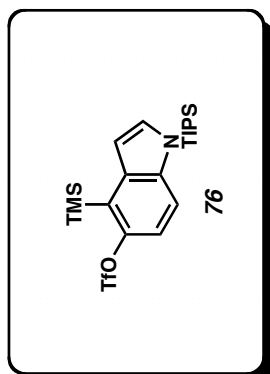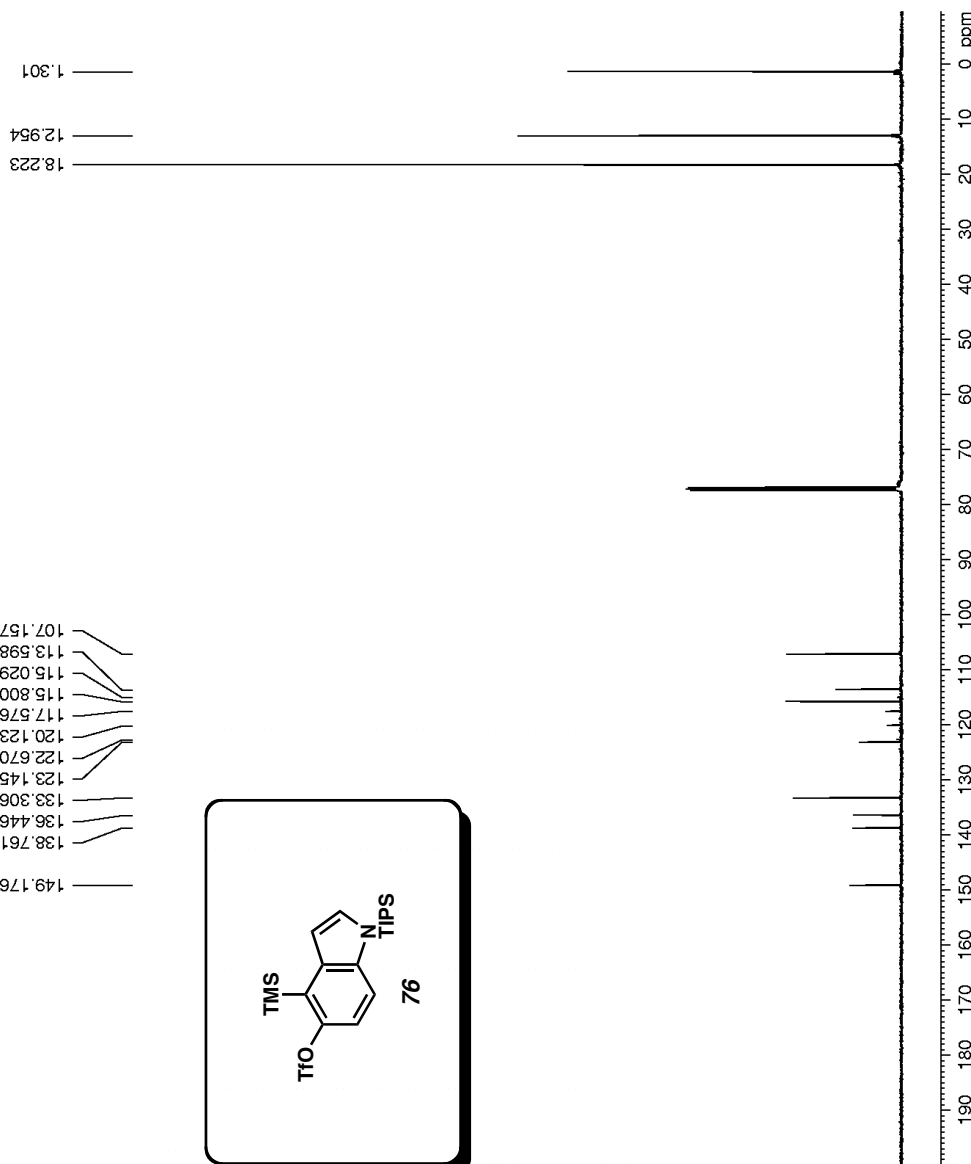

Current Data Parameters  
 NAME GJI-II-144+147  
 EXPNO 21  
 PROCNO 1

F2 - Acquisition Parameters  
 Date\_ 20090924  
 Time 17.11  
 INSTRUM aix500  
 PROBHD 5 mm broadband  
 PULPROG zgpg30  
 TD 68536  
 SOLVENT CDCl3  
 NS 1024  
 DS 0  
 SWH 35714.285 Hz  
 FIDRES 0.544957 Hz  
 AQ 0.9175540 sec  
 RG 45500  
 DW 14.000 usec  
 DE 20.00 usec  
 TE 300.0 K  
 D12 0.0000200 sec  
 DL5 17.70 dB  
 CPDPRG waltz16  
 P31 100.00 usec  
 D1 2.0000000 sec  
 P1 6.80 usec  
 SFO1 125.7728999 MHz  
 NUCLEUS 13C  
 D11 0.0300000 sec

F2 - Processing parameters  
 SI 32768  
 SF 125.7577997 MHz  
 WDW EM  
 SSB 0  
 LB 1.00 Hz  
 GB 0  
 PC 1.40

GJI-II-144 + 147 C13

148.782  
 133.495  
 132.446  
 126.111  
 123.718  
 122.531  
 119.982  
 117.434  
 114.885  
 114.421  
 113.196  
 106.025

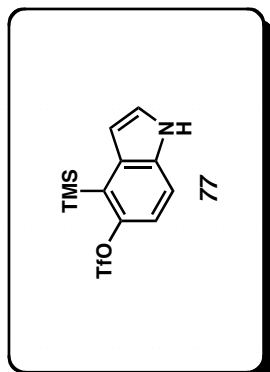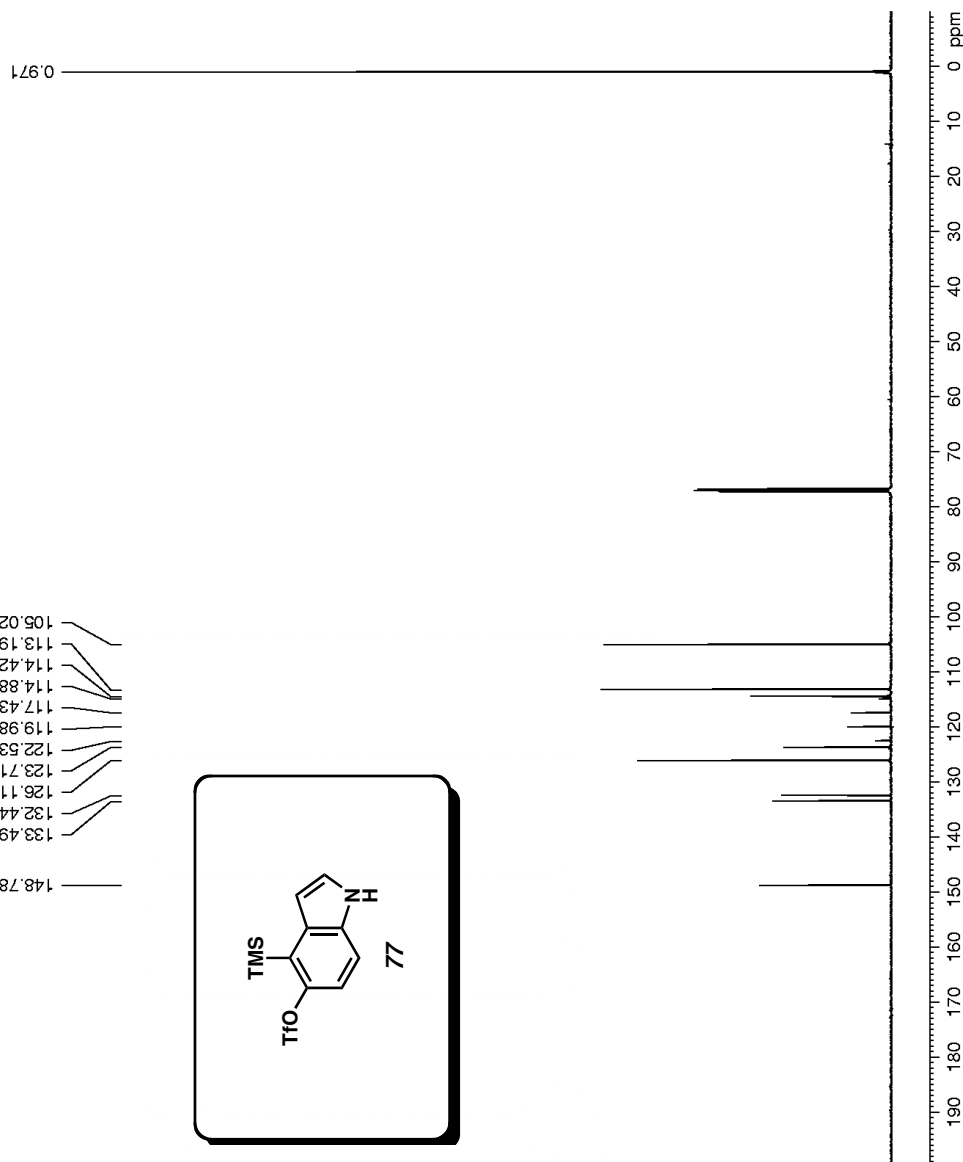

Current Data Parameters  
 NAME GJI-II-148+152  
 EXPNO 11  
 PROCNO 1

F2 - Acquisition Parameters  
 Date\_ 20090924  
 Time 18:57  
 INSTRUM aix500  
 PROBHD 5 mm broadband  
 PULPROG zgpg30  
 TD 68536  
 SOLVENT CDCl3  
 NS 1024  
 DS 0  
 SWH 35714.285 Hz  
 FIDRES 0.544957 Hz  
 AQ 0.9175540 sec  
 RG 16384  
 DW 14.000 usec  
 DE 20.00 usec  
 TE 300.0 K  
 D12 0.000200 sec  
 DL5 17.70 dB  
 CPDPRG waltz16  
 P31 100.00 usec  
 D1 2.0000000 sec  
 P1 6.80 usec  
 SFO1 125.7728999 MHz  
 NUCLEUS 13C  
 D11 0.0300000 sec

F2 - Processing parameters  
 SI 32768  
 SF 125.7577943 MHz  
 WDW EM  
 SSB 0  
 LB 1.00 Hz  
 GB 0  
 PC 1.40

GJI-II-148 + 152 C13

150.265  
 149.155  
 135.870  
 133.332  
 127.514  
 124.663  
 122.496  
 119.947  
 117.394  
 117.348  
 116.295  
 114.845  
 108.466  
 84.424

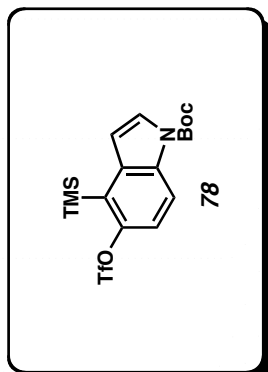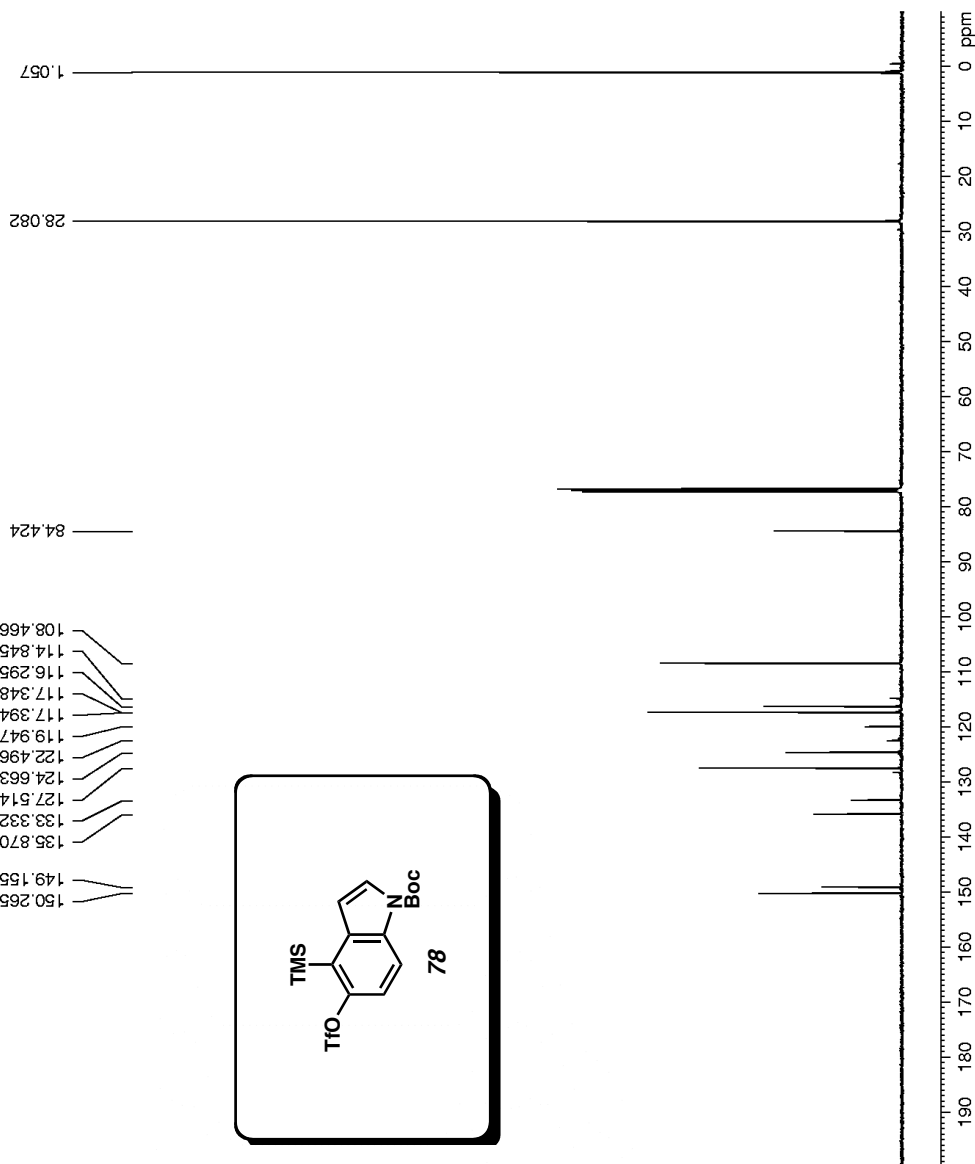



```

Current Data Parameters
NAME_ smb-3-177carbon
EXPNO 1
PROCNO 1

F2 - Acquisition Parameters
Date_ 20100428
Time_ 9.08
INSTRUM av300
PROBHD 5 mm PABBO BB-
PULPROG zgpg30
TD 68536
SOLVENT CDCl3
NS 11759
DS 0
SWH 18832.393 Hz
FIDRES 0.287360 Hz
AQ 1.7400308 sec
RG 32768
DW 26.550 usec
DE 6.00 usec
TE 299.3 K
D1 2.0000000 sec
d11 0.0300000 sec
TD0 1

===== CHANNEL f1 =====
NUC1 13C
P1 7.00 usec
PL1 -4.00 dB
SFO1 75.4768051 MHz

===== CHANNEL f2 =====
CPDPRG2 waltz16
NUC2 1H
PCPD2 80.00 usec
PL2 -2.00 dB
PL12 14.85 dB
SFO2 300.1318008 MHz

F2 - Processing parameters
SI 32768
SF 75.4677389 MHz
WDW EM
SSB 0
LB 1.00 Hz
GB 0
PC 1.40
    
```

default carbon parameters

81.977  
83.203  
99.553  
106.217  
115.051  
123.146  
126.228  
135.520  
141.036  
141.963  
143.013  
145.108

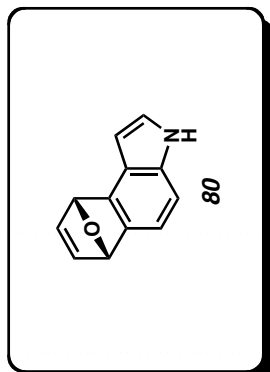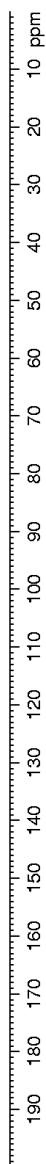

Current Data Parameters  
 NAME smb-3-96carb12  
 EXPNO 1  
 PROCNO 1

F2 - Acquisition Parameters  
 Date\_ 20100425  
 Time 10.31  
 INSTRUM aix500  
 PROBHD 5 mm broadband  
 PULPROG zgpg30  
 TD 68536  
 SOLVENT CDCl3  
 NS 28851  
 DS 0  
 SWH 35714.285 Hz  
 FIDRES 0.544957 Hz  
 AQ 0.9175540 sec  
 RG 45500  
 DW 14.000 usec  
 DE 20.000 usec  
 TE 300.0 K  
 D12 0.000200 sec  
 DL5 17.70 dB  
 CPDPRG waltz16  
 P31 100.00 usec  
 P1 2.0000000 sec  
 P1 6.80 usec  
 SFO1 125.7728999 MHz  
 NUCLEUS 13C  
 D11 0.0300000 sec

F2 - Processing parameters  
 SI 32768  
 SF 125.757770 MHz  
 WDW EM  
 SSB 0  
 LB 1.00 Hz  
 GB 0  
 PC 1.40

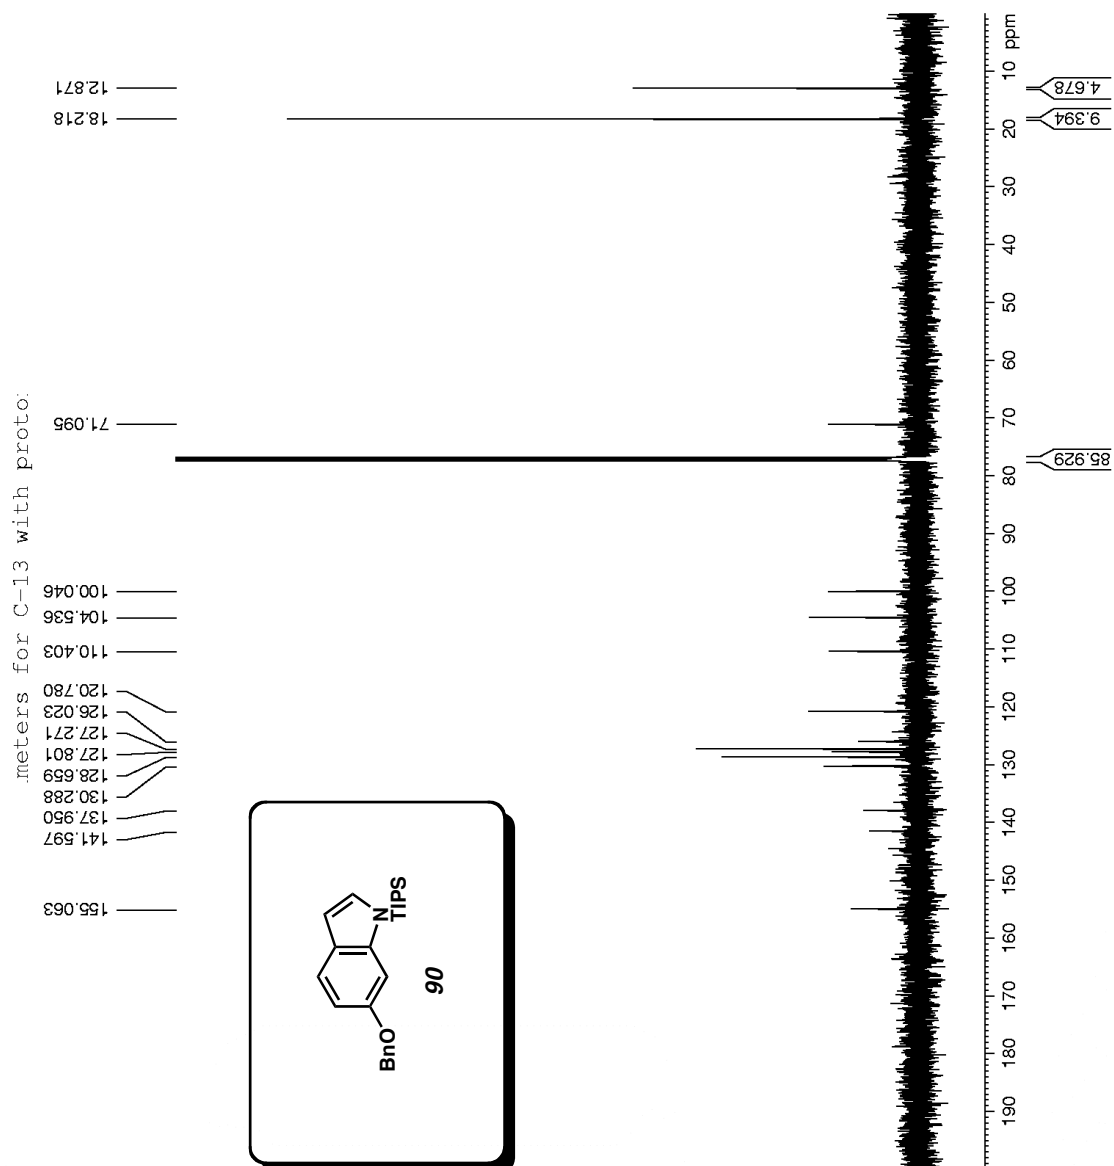



Current Data Parameters  
 NAME smb-2-112pure2c13  
 EXPNO 2  
 PROCNO 1

F2 - Acquisition Parameters  
 Date\_ 20090128  
 Time 6.32

INSTRUM avance500  
 PROBHD 5 mm bb-Z Z800  
 PULPROG zgpg30  
 TD 68536

SOLVENT CDCl3  
 NS 389  
 DS 0

SWH 32679.738 Hz  
 FIDRES 0.498653 Hz  
 AQ 1.0027661 sec  
 RG 1149.4

DW 15.300 usec  
 DE 6.00 usec  
 TE 295.1 K

D1 2.0000000 sec  
 d11 0.0300000 sec  
 MCREST 0.0000000 sec  
 MCWRK 0.01500000 sec

==== CHANNEL f1 =====

NUC1 <sup>13</sup>C  
 P1 5.25 usec  
 PL1 0.00 dB  
 SFO1 125.8231939 MHz

==== CHANNEL f2 =====

CPDPRG2 waltz16  
 NUC2 <sup>1</sup>H  
 PCPD2 100.00 usec  
 PL2 120.00 dB  
 PL12 16.10 dB  
 SFO2 500.3320013 MHz

F2 - Processing parameters  
 SI 65536  
 SF 125.8080566 MHz  
 WDW EM  
 SSB 0  
 LB 1.00 Hz  
 GB 0  
 PC 1.40

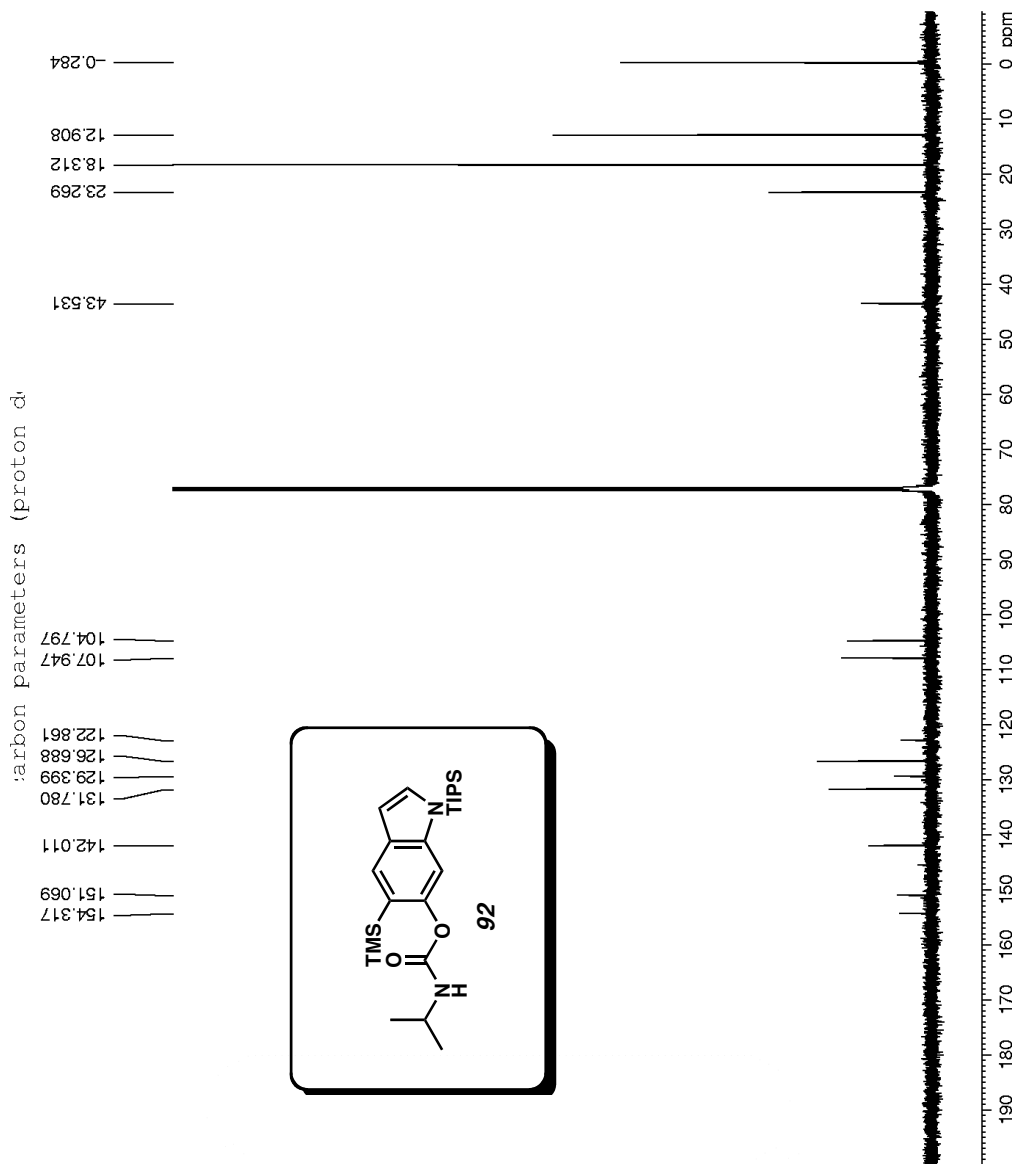

```

Current Data Parameters
NAME   smb-2-113C13
EXPNO   2
PROCNO   1

F2 - Acquisition Parameters
Date_   20090128
Time    19.34
INSTRUM  avance500
PROBHD  5 mm bb-Z Z800
PULPROG  zgpg30
TD       68536
SOLVENT  CDCl3
NS       12224
DS       0
SWH      32679.738 Hz
FIDRES   0.498653 Hz
AQ        1.0027661 sec
RG        2048
DW        15.300 usec
DE        6.00 usec
TE        294.5 K
D1        2.00000000 sec
d11       0.03000000 sec
MCREST   0.00000000 sec
MCWRK    0.01500000 sec

===== CHANNEL f1 =====
NUC1      13C
P1        5.25 usec
PL1       0.00 dB
SFO1     125.8231939 MHz

===== CHANNEL f2 =====
CPDPRG2  waltz16
NUC2      1H
PCPD2    100.00 usec
PL2      120.00 dB
PL12     16.10 dB
SFO2     500.3320013 MHz

F2 - Processing parameters
SI        65536
SF        125.8080557 MHz
WDW       EM
SSB       0
LB        1.00 Hz
GB         0
PC        1.40
    
```

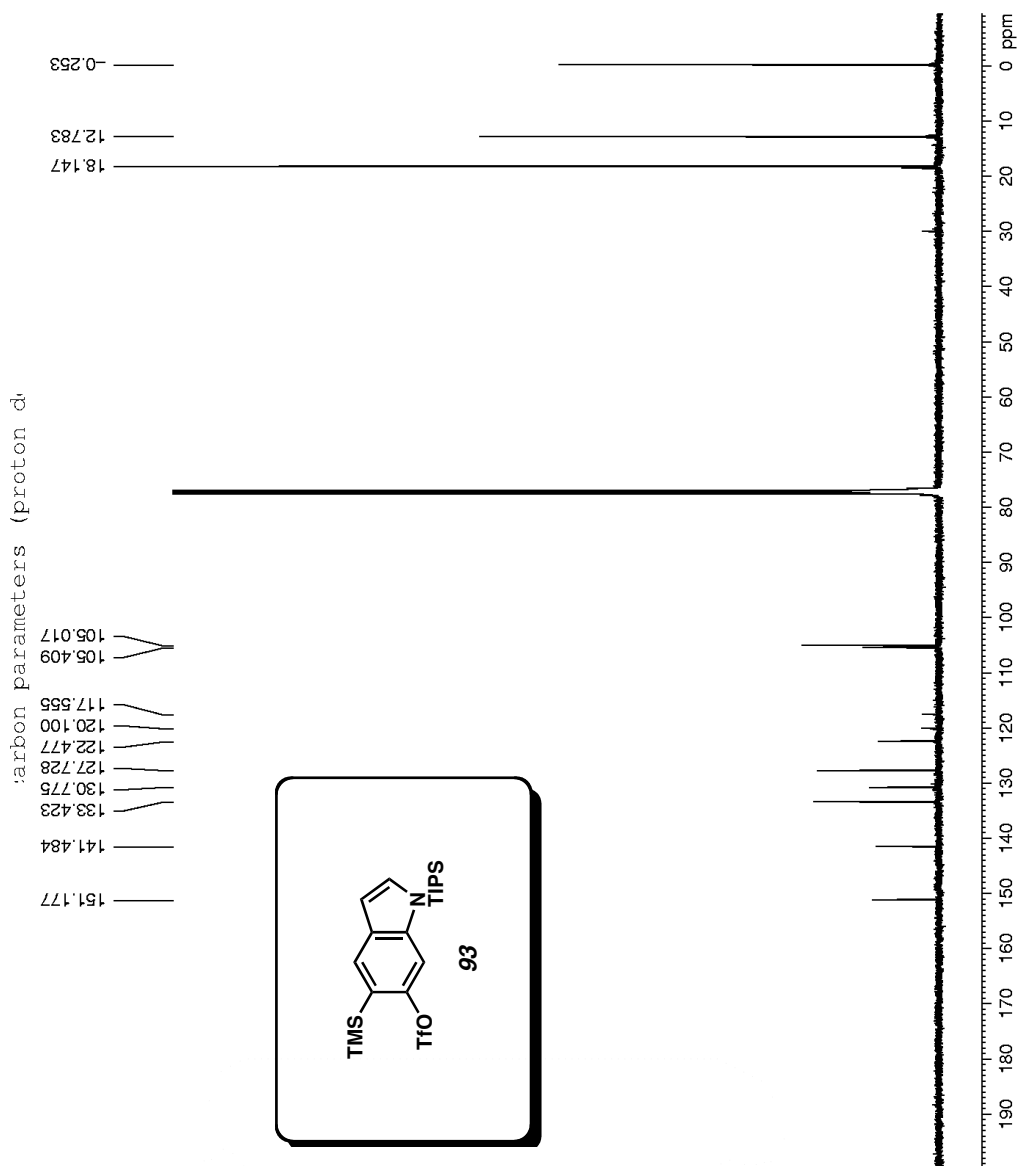

Current Data Parameters  
 NAME GJI-II-184  
 EXPNO 11  
 PROCNO 1

F2 - Acquisition Parameters  
 Date\_ 20090225  
 Time 17.38  
 INSTRUM aix500  
 PROBHD 5 mm broadband  
 PULPROG zgpg30  
 TD 68536  
 SOLVENT CDCl3  
 NS 1024  
 DS 0  
 SWH 35714.285 Hz  
 FIDRES 0.544957 Hz  
 AQ 0.9175540 sec  
 RG 45500  
 DW 14.000 usec  
 DE 20.00 usec  
 TE 300.0 K  
 D12 0.000200 sec  
 DL5 17.70 dB  
 CPDPRG waltz16  
 P31 100.00 usec  
 D1 2.0000000 sec  
 P1 6.80 usec  
 SFO1 125.7728999 MHz  
 NUCLEUS 13C  
 D11 0.0300000 sec

F2 - Processing parameters  
 SI 32768  
 SF 125.7578090 MHz  
 WDW EM  
 SSB 0  
 LB 1.00 Hz  
 GB 0  
 PC 1.40

GJI-II-184 C13

150.971  
 136.985  
 128.038  
 127.169  
 126.184  
 122.456  
 119.779  
 117.235  
 102.669  
 102.397

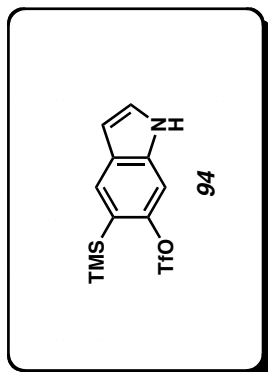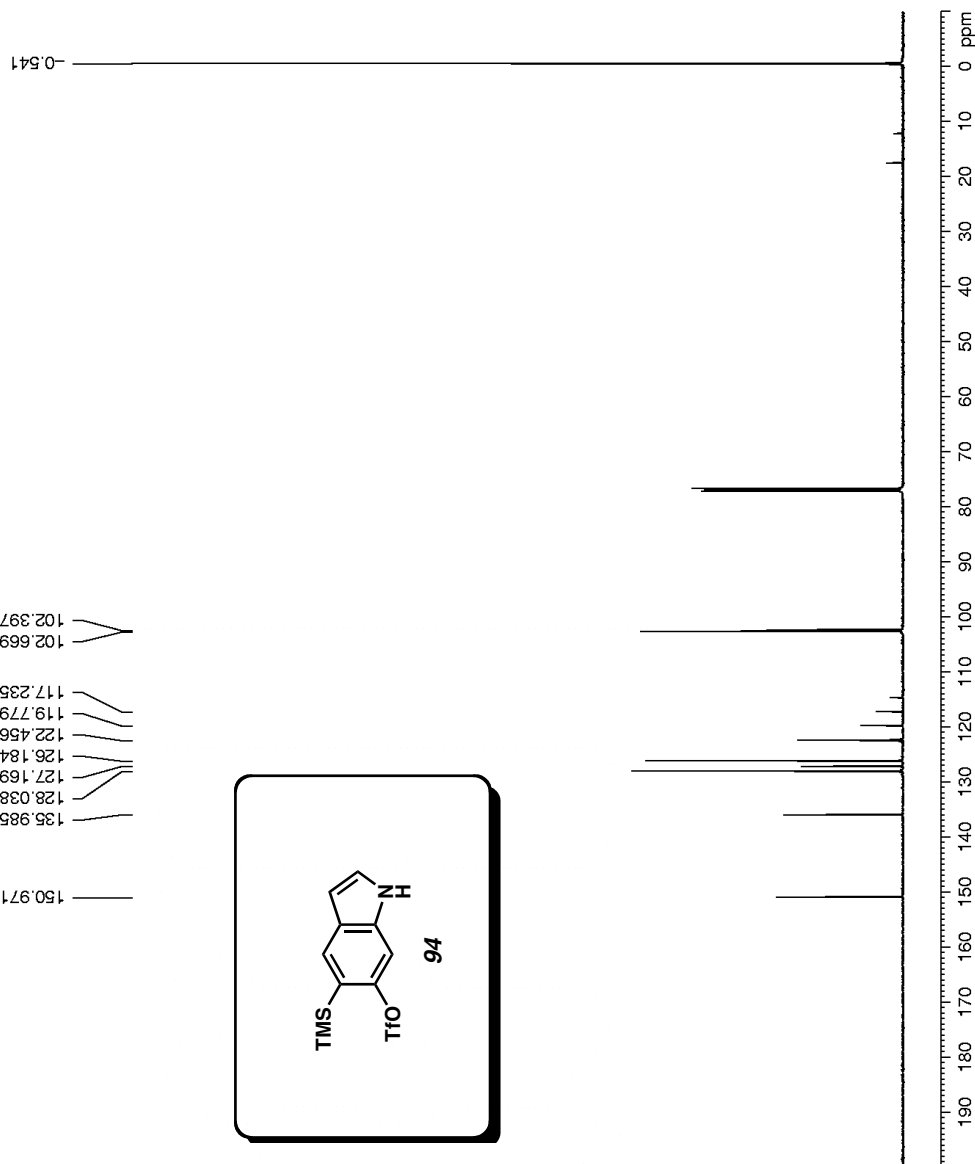

```

Current Data Parameters
NAME   GJL-II-194C13
EXPNO  11
PROCNO 1

F2 - Acquisition Parameters
Date_   20100402
Time    20.19
INSTRUM  avance500
PROBHD  5 mm bb-Z Z800
PULPROG  zgpg30
TD       68536
SOLVENT  CDCl3
NS       1024
DS       0
SWH      32679.738 Hz
FIDRES   0.498653 Hz
AQ       1.0027661 sec
RG       5792.6
DW       15.300 usec
DE       6.00 usec
TE       313.0 K
D1       2.0000000 sec
d11      0.03000000 sec
MCREST   0.00000000 sec
MCWRK    0.01500000 sec

===== CHANNEL f1 =====
NUC1     13C
P1       6.20 usec
PL1      0.00 dB
SFO1     125.8231939 MHz

===== CHANNEL f2 =====
CPDPRG2  waltz16
NUC2     1H
PCPD2    100.00 usec
PL2      120.00 dB
PL12     16.10 dB
SFO2     500.3320013 MHz

F2 - Processing parameters
SI       65536
SF       125.8080969 MHz
WDW      EM
SSB      0
LB       1.00 Hz
GB       0
PC       1.40
    
```

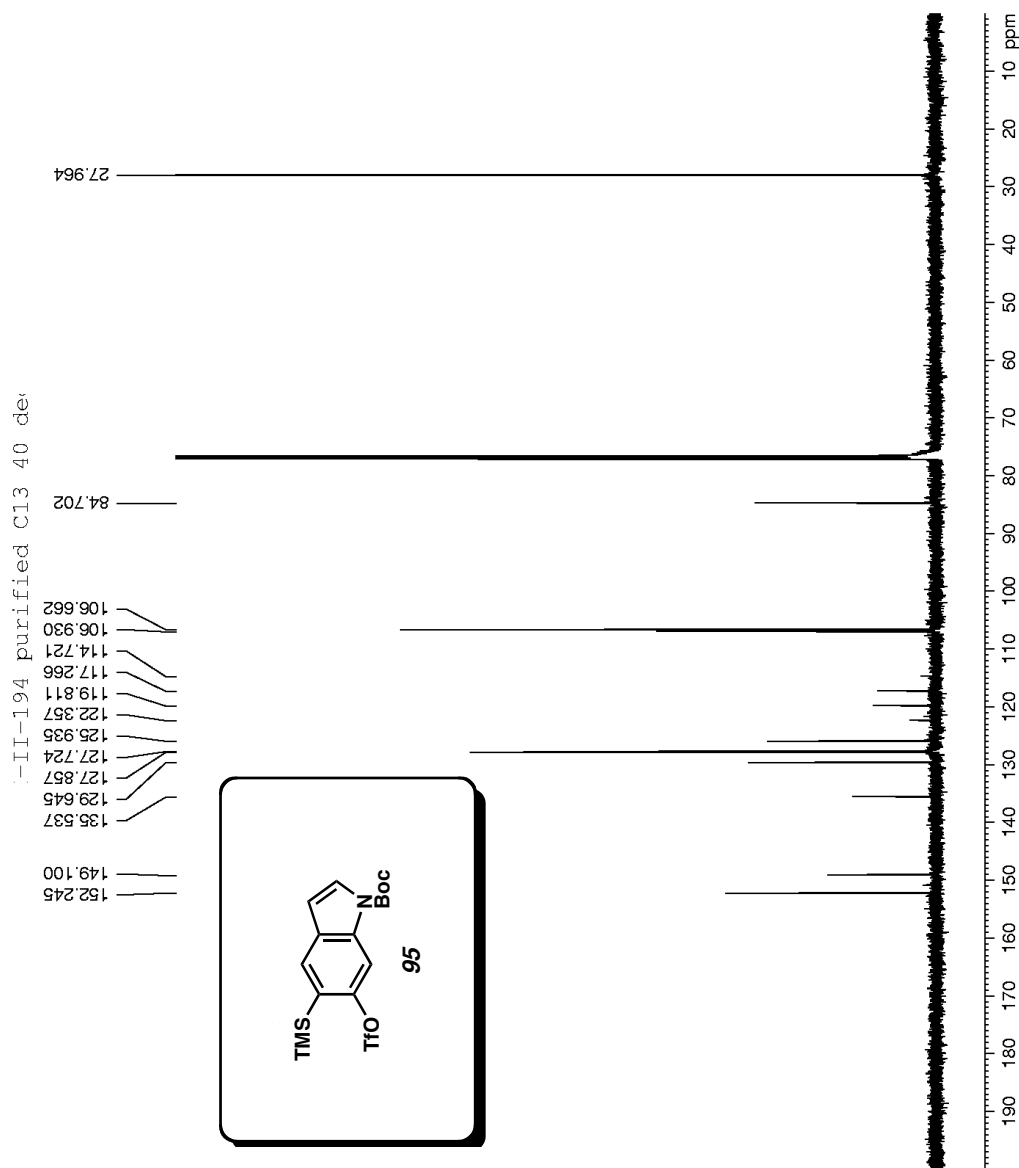

Current Data Parameters  
 NAME GJI-II-265VT  
 EXPNO 31  
 PROCNO 1

F2 - Acquisition Parameters  
 Date\_ 20091223  
 Time 2:07  
 INSTRUM advance500  
 PROBHD 5 mm bb-Z Z800  
 PULPROG zgpg30  
 TD 65536  
 SOLVENT CDCl3  
 NS 2648  
 DS 0  
 SWH 32679.738 Hz  
 FIDRES 0.498653 Hz  
 AQ 1.0027661 sec  
 RG 10321.3  
 DW 15.300 usec  
 DE 6.00 usec  
 TE 312.7 K  
 D1 2.0000000 sec  
 d11 0.03000000 sec  
 MCREST 0.00000000 sec  
 MCWPRK 0.01500000 sec

==== CHANNEL f1 =====  
 NUC1 <sup>13</sup>C  
 P1 6.20 usec  
 PL1 0.00 dB  
 SFO1 125.8231939 MHz

==== CHANNEL f2 =====  
 CPDPRG2 waltz16  
 NUC2 <sup>1</sup>H  
 PCPD2 100.00 usec  
 PL2 120.00 dB  
 PL12 16.10 dB  
 SFO2 500.3320013 MHz

F2 - Processing parameters  
 SI 65536  
 SF 125.8080969 MHz  
 WDW EM  
 SSB 0  
 LB 1.00 Hz  
 GB 0  
 PC 1.40

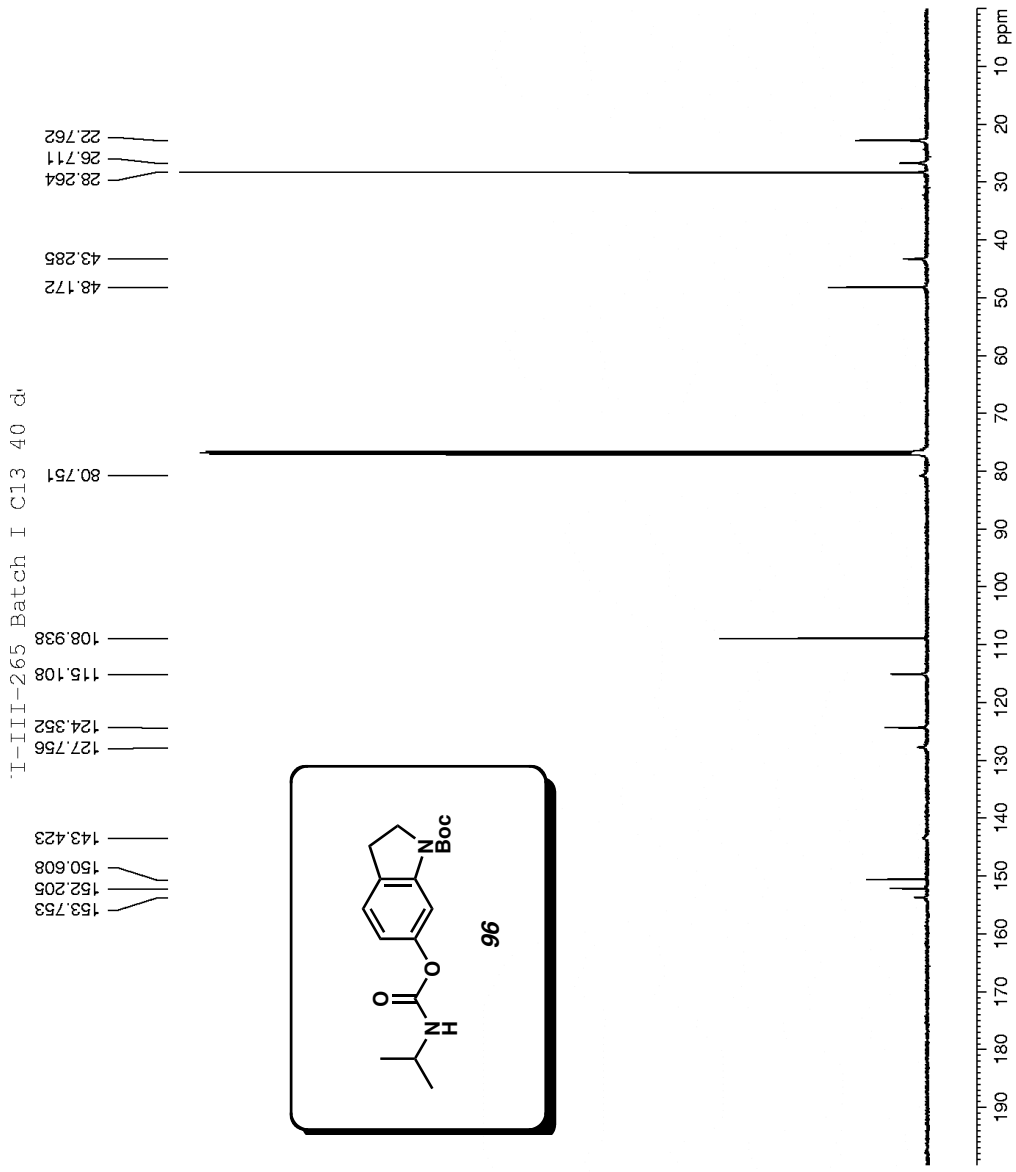



Current Data Parameters  
 NAME GJI-III-17VT  
 EXPNO 22  
 PROCNO 1

F2 - Acquisition Parameters  
 Date\_ 20091226  
 Time 3.07  
 INSTRUM advance500  
 PROBHD 5 mm bb-Z Z800  
 PULPROG zgpg30  
 TD 65536  
 SOLVENT CDCl3  
 NS 184  
 DS 0  
 SWH 32679.738 Hz  
 FIDRES 0.498653 Hz  
 AQ 1.0027661 sec  
 RG 13004  
 DW 15.300 usec  
 DE 6.00 usec  
 TE 312.9 K  
 D1 2.0000000 sec  
 d11 0.03000000 sec  
 MCREST 0.00000000 sec  
 MCWPRK 0.01500000 sec

==== CHANNEL f1 =====  
 NUC1 13C  
 P1 6.20 usec  
 PL1 0.00 dB  
 SFO1 125.8231939 MHz

==== CHANNEL f2 =====  
 CPDPRG2 waltz16  
 NUC2 1H  
 PCPD2 100.00 usec  
 PL2 120.00 dB  
 PL12 16.10 dB  
 SFO2 500.3320013 MHz

F2 - Processing parameters  
 SI 65536  
 SF 125.8080969 MHz  
 WDW EM  
 SSB 0  
 LB 1.00 Hz  
 GB 0  
 PC 1.40

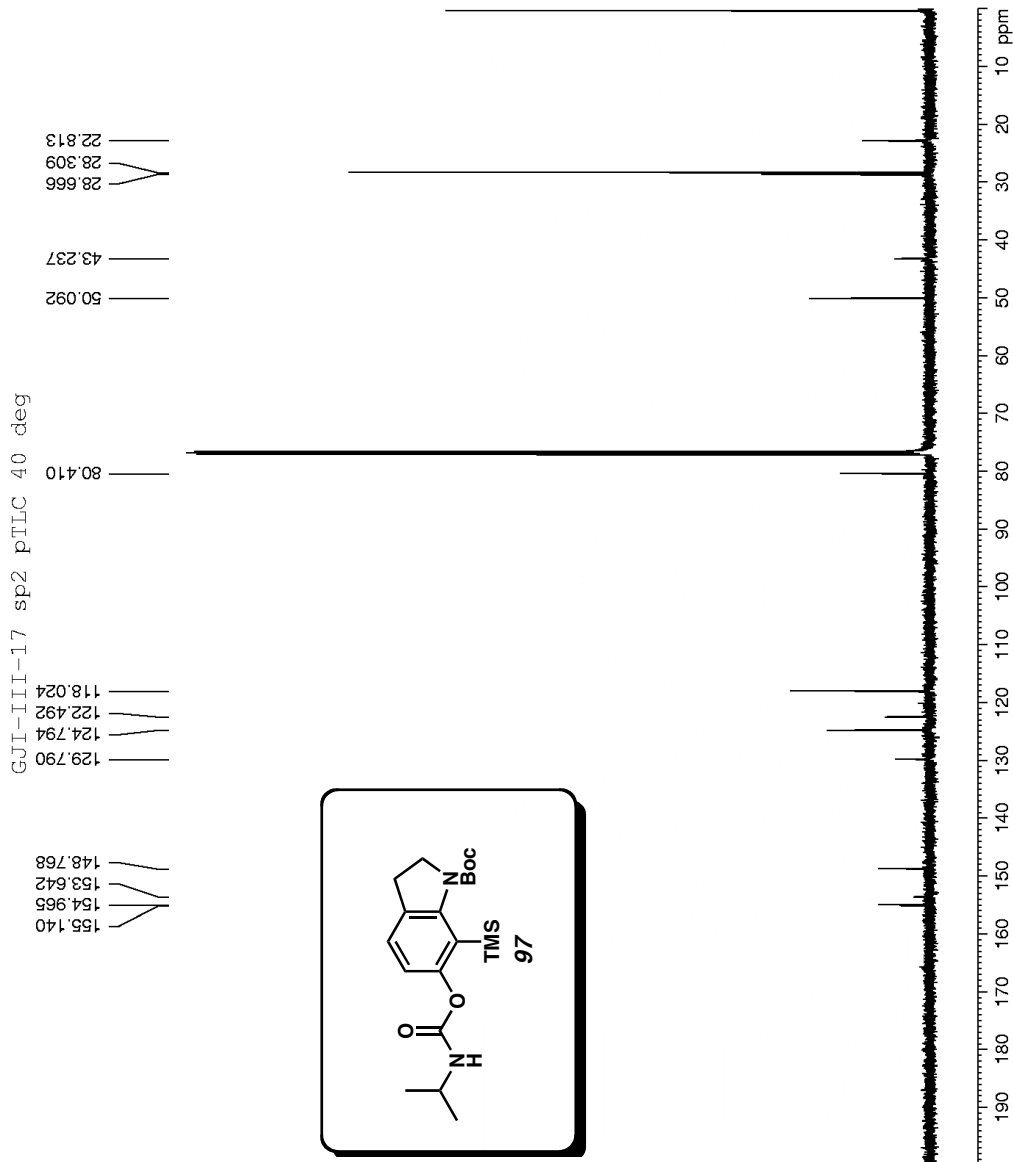

Current Data Parameters  
 NAME GJI-III-19  
 EXPNO 11  
 PROCNO 1

F2 - Acquisition Parameters  
 Date\_ 20090925  
 Time 18:49  
 INSTRUM aix500  
 PROBHD 5 mm broadband  
 PULPROG zgpg30  
 TD 65536  
 SOLVENT CDCl3  
 NS 1024  
 DS 0  
 SWH 35714.285 Hz  
 FIDRES 0.544957 Hz  
 AQ 0.9175540 sec  
 RG 16384  
 DW 14.000 usec  
 DE 20.00 usec  
 TE 300.0 K  
 D12 0.000200 sec  
 DL5 17.70 dB  
 CPDPRG waltz16  
 P31 100.00 usec  
 D1 2.0000000 sec  
 P1 6.80 usec  
 SFO1 125.7728999 MHz  
 NUCLEUS 13C  
 D11 0.0300000 sec

F2 - Processing parameters  
 SI 32768  
 SF 125.7578090 MHz  
 WDW EM  
 SSB 0  
 LB 1.00 Hz  
 GB 0  
 PC 1.40

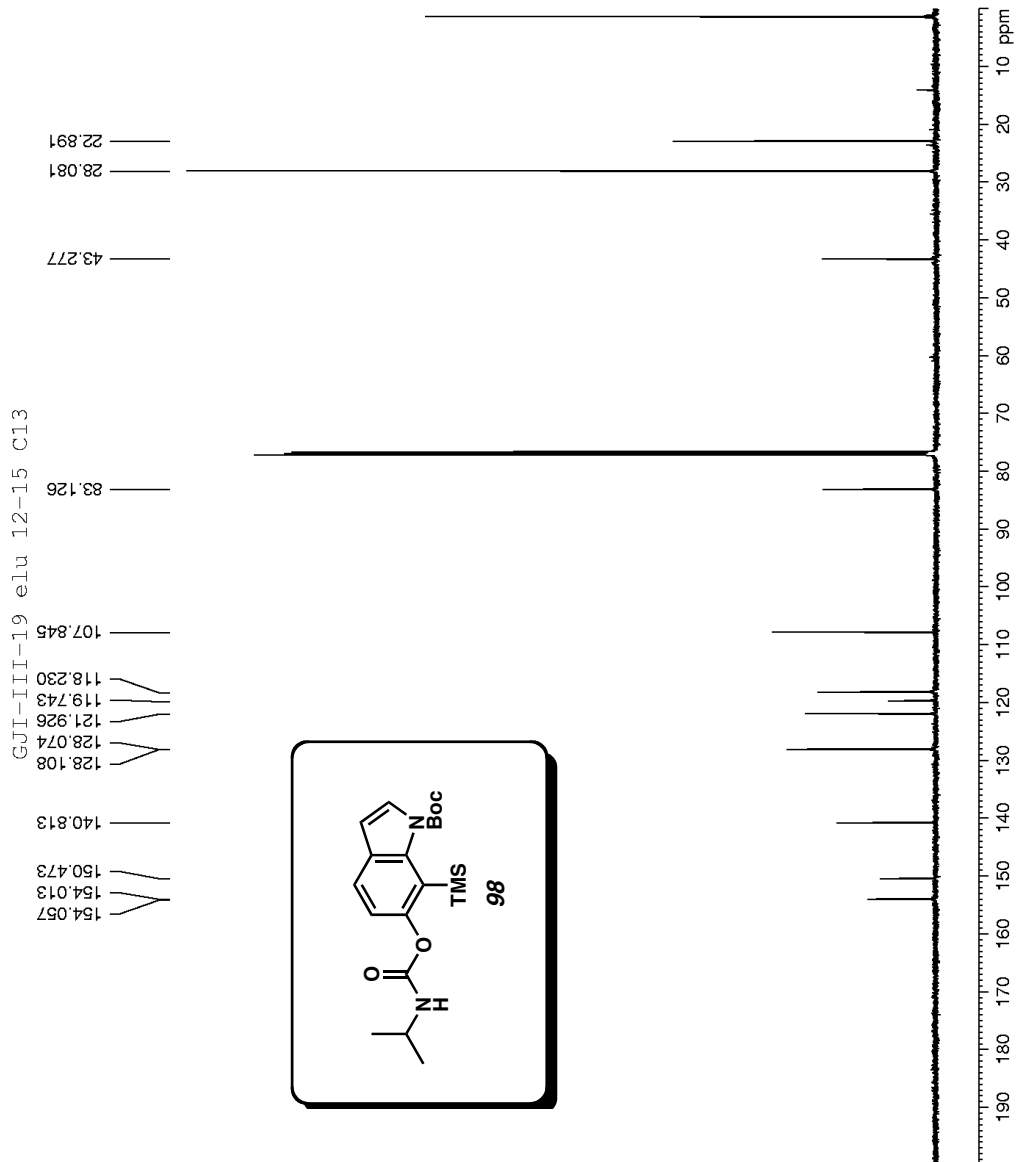

Current Data Parameters  
 NAME GJI-II-87  
 EXPNO 31  
 PROCNO 1

F2 – Acquisition Parameters  
 Date\_ 20091219  
 Time 5:34  
 INSTRUM avance500  
 PROBHD 5 mm bb-Z Z800  
 PULPROG zgpg30  
 TD 68536  
 SOLVENT CDCl3  
 NS 4096  
 DS 0  
 SWH 32679.738 Hz  
 FIDRES 0.498653 Hz  
 AQ 1.0027661 sec  
 RG 6502  
 DW 15.300 usec  
 DE 6.00 usec  
 TE 294.6 K  
 D1 2.00000000 sec  
 d11 0.03000000 sec  
 MCREST 0.00000000 sec  
 MCWRK 0.01500000 sec

==== CHANNEL f1 =====  
 NUC1 13C  
 P1 6.20 usec  
 PL1 0.00 dB  
 SFO1 125.8231939 MHz

==== CHANNEL f2 =====  
 CPDPRG2 waltz16  
 NUC2 1H  
 PCPD2 100.00 usec  
 PL2 120.00 dB  
 PL12 16.10 dB  
 SFO2 500.3320013 MHz

F2 – Processing parameters  
 SI 65536  
 SF 125.8080969 MHz  
 WDW EM  
 SSB 0  
 LB 1.00 Hz  
 GB 0  
 PC 1.40

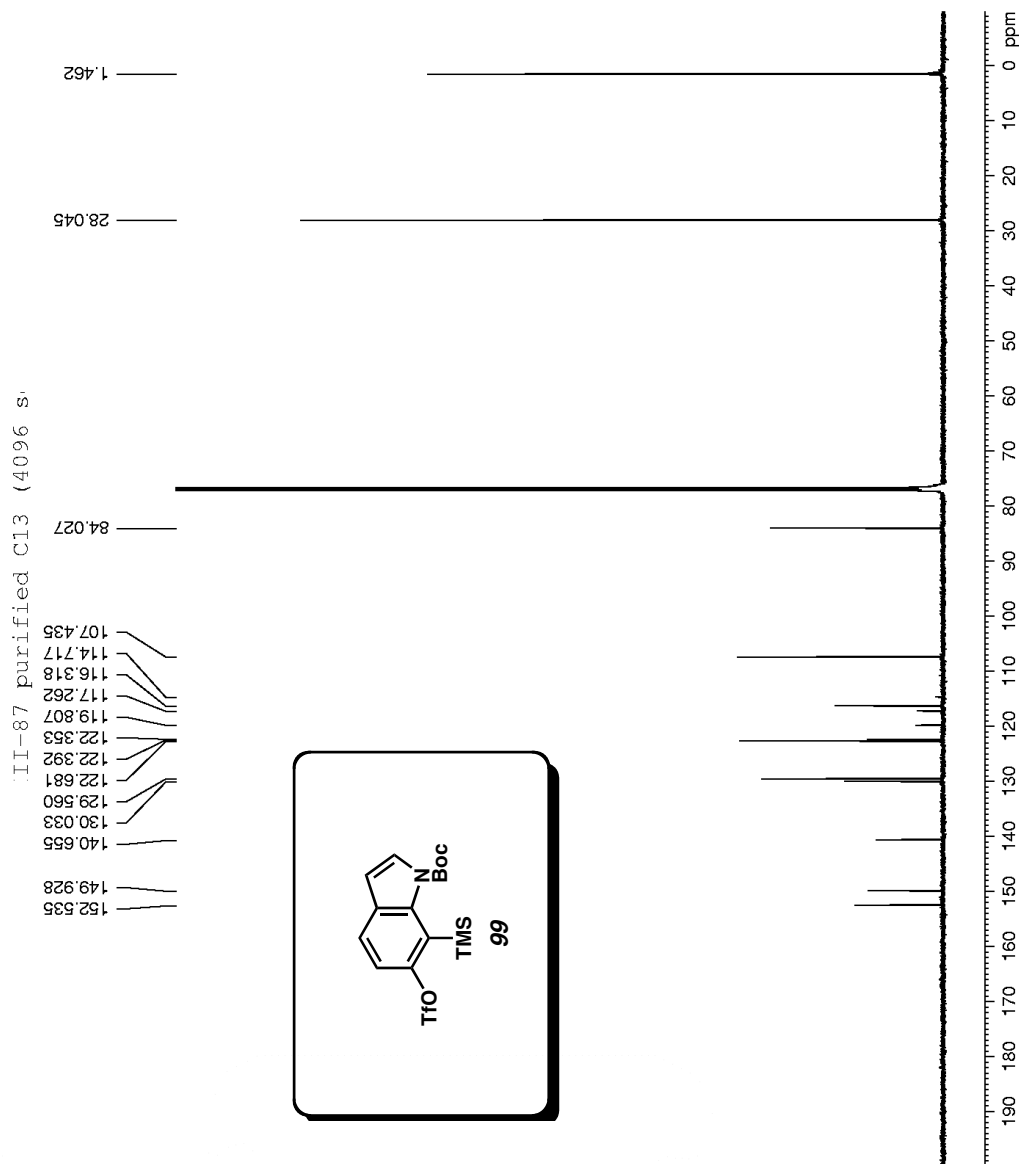

Current Data Parameters  
 NAME GJI-III-100  
 EXPNO 21  
 PROCNO 1

F2 - Acquisition Parameters  
 Date\_ 20091215  
 Time 5.02  
 INSTRUM avance500  
 PROBHD 5 mm bb-Z Z800  
 PULPROG zgpg30  
 TD 68536  
 SOLVENT CDCl3  
 NS 2048  
 DS 0  
 SWH 32679.738 Hz  
 FIDRES 0.498653 Hz  
 AQ 1.0027661 sec  
 RG 13004  
 DW 15.300 usec  
 DE 6.00 usec  
 TE 294.8 K  
 D1 2.00000000 sec  
 d11 0.03000000 sec  
 MCREST 0.00000000 sec  
 MCWRK 0.01500000 sec

==== CHANNEL f1 =====  
 NUC1 13C  
 P1 6.20 usec  
 PL1 0.00 dB  
 SFO1 125.8231939 MHz

==== CHANNEL f2 =====  
 CPDPRG2 waltz16  
 NUC2 1H  
 PCPD2 100.00 usec  
 PL2 120.00 dB  
 PL12 16.10 dB  
 SFO2 500.3320013 MHz

F2 - Processing parameters  
 SI 65536  
 SF 125.8080969 MHz  
 WDW EM  
 SSB 0  
 LB 1.00 Hz  
 GB 0  
 PC 1.40

GJI-III-100 purified C13

151.077  
 139.476  
 126.346  
 125.958  
 123.012  
 122.371  
 119.826  
 117.280  
 114.735  
 113.083  
 112.360  
 112.348  
 102.546

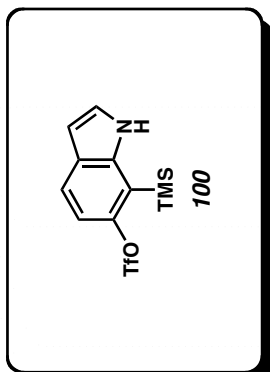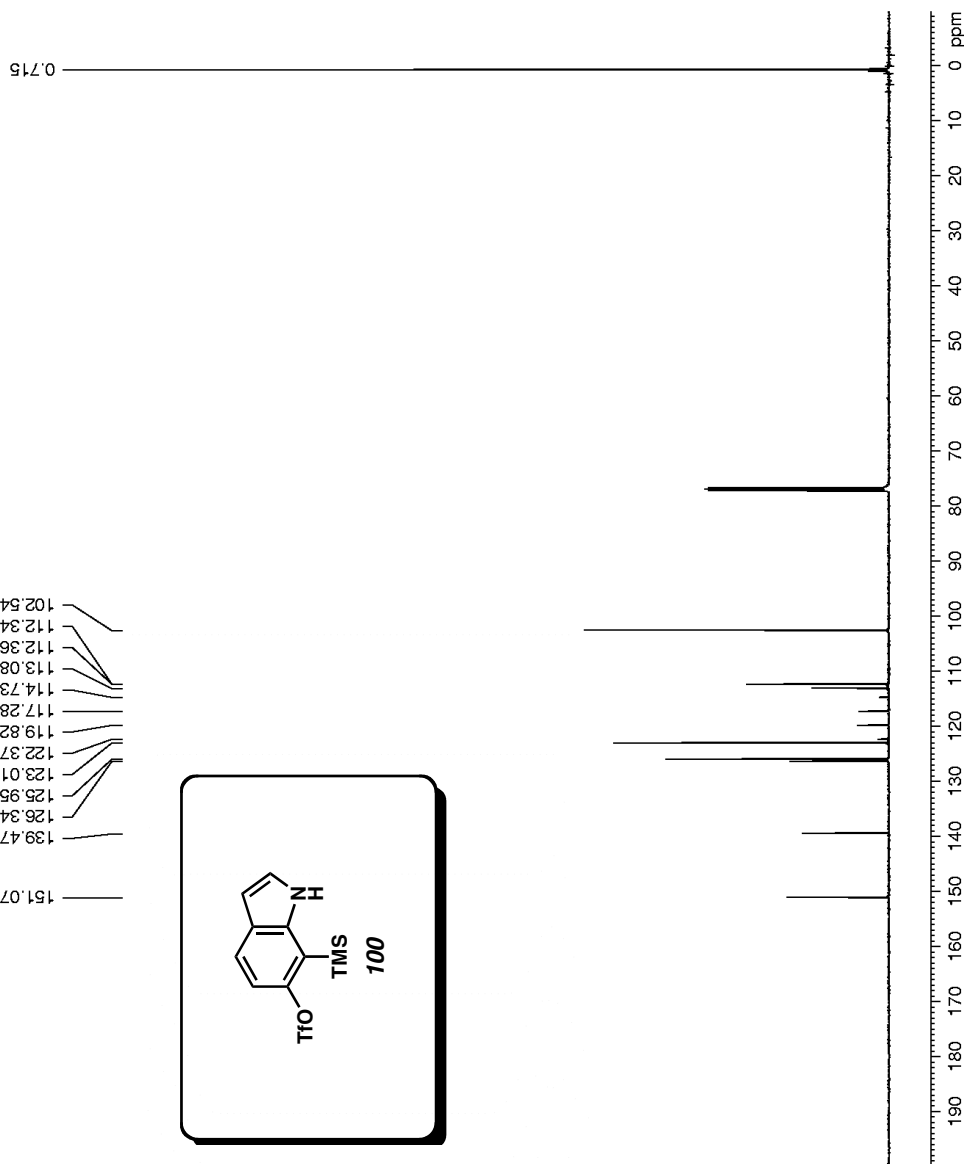

Current Data Parameters  
 NAME GJI-III-132  
 EXPNO 11  
 PROCNO 1

F2 - Acquisition Parameters  
 Date\_ 20100313  
 Time 2.18  
 INSTRUM avance500  
 PROBHD 5 mm bb-Z Z800  
 PULPROG zgpg30  
 TD 68536  
 SOLVENT CDCl3  
 NS 128  
 DS 0  
 SWH 32679.738 Hz  
 FIDRES 0.498653 Hz  
 AQ 1.0027661 sec  
 RG 3649.1  
 DW 15.300 usec  
 DE 6.00 usec  
 TE 296.1 K  
 D1 2.0000000 sec  
 d11 0.03000000 sec  
 MCREST 0.00000000 sec  
 MCWRK 0.01500000 sec

==== CHANNEL f1 =====  
 NUC1 <sup>13</sup>C  
 P1 6.20 usec  
 PL1 0.00 dB  
 SFO1 125.8231939 MHz

==== CHANNEL f2 =====  
 CPDPRG2 waltz16  
 NUC2 <sup>1</sup>H  
 PCPD2 100.00 usec  
 PL2 120.00 dB  
 PL12 16.10 dB  
 SFO2 500.3320013 MHz

F2 - Processing parameters  
 SI 65536  
 SF 125.8080969 MHz  
 WDW EM  
 SSB 0  
 LB 1.00 Hz  
 GB 0  
 PC 1.40

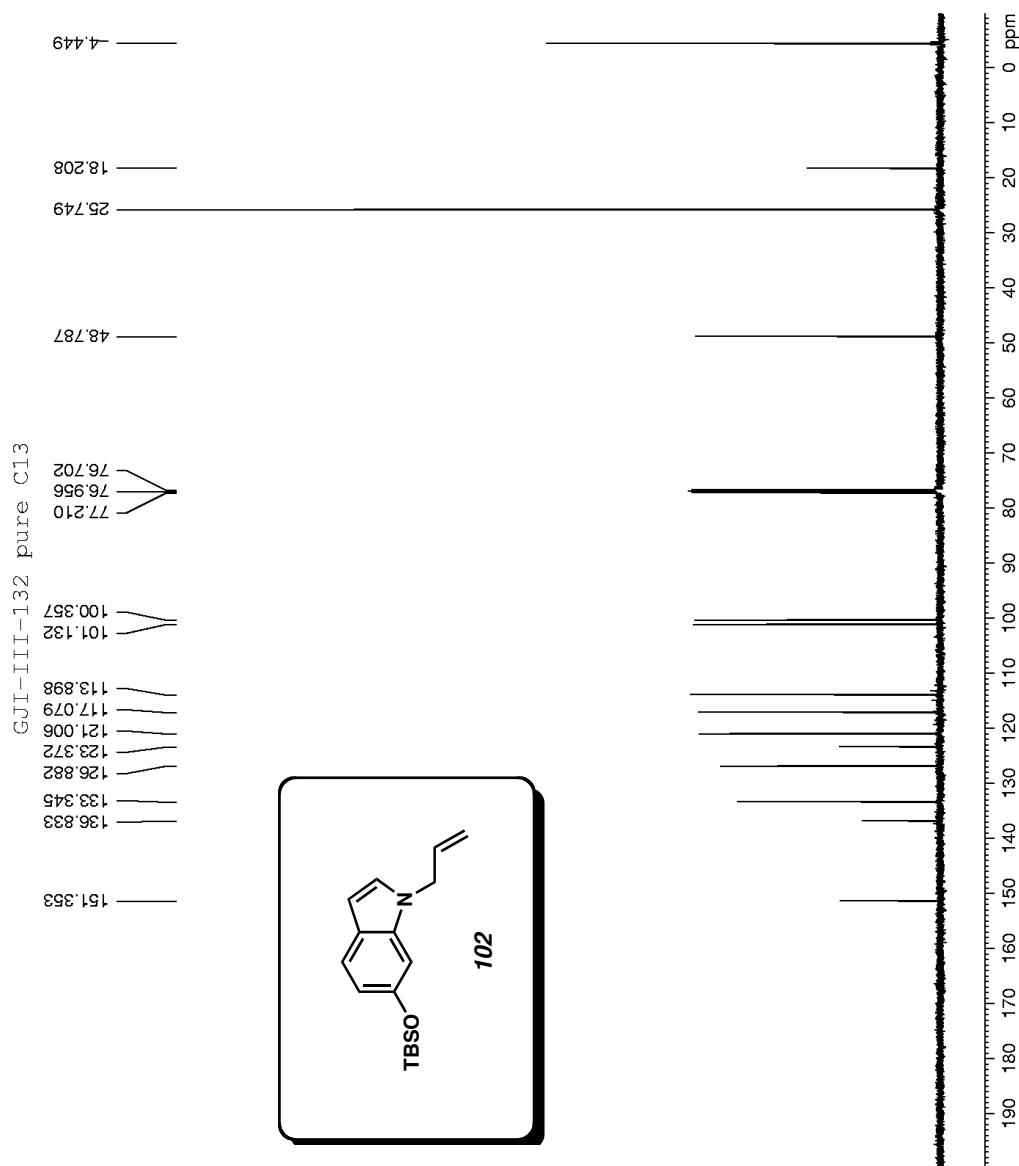

Current Data Parameters  
 NAME GJI-III-128  
 EXPNO 11  
 PROCNO 1

F2 - Acquisition Parameters  
 Date\_ 20100317  
 Time 3.01  
 INSTRUM avance500  
 PROBHD 5 mm bb-Z Z800  
 PULPROG zgpg30  
 TD 68536  
 SOLVENT CDCl3  
 NS 512  
 DS 0  
 SWH 32679.738 Hz  
 FIDRES 0.498653 Hz  
 AQ 1.0027661 sec  
 RG 13004  
 DW 15.300 usec  
 DE 6.00 usec  
 TE 296.6 K  
 D1 2.0000000 sec  
 d11 0.0300000 sec  
 MCREST 0.0000000 sec  
 MCWRK 0.01500000 sec

==== CHANNEL f1 =====  
 NUC1 <sup>13</sup>C  
 P1 6.20 usec  
 PL1 0.00 dB  
 SFO1 125.8231939 MHz

==== CHANNEL f2 =====  
 CPDPRG2 waltz16  
 NUC2 <sup>1</sup>H  
 PCPD2 100.00 usec  
 PL2 120.00 dB  
 PL12 16.10 dB  
 SFO2 500.3320013 MHz

F2 - Processing parameters  
 SI 65536  
 SF 125.8080969 MHz  
 WDW EM  
 SSB 0  
 LB 1.00 Hz  
 GB 0  
 PC 1.40

GJI-III-128 purified C13

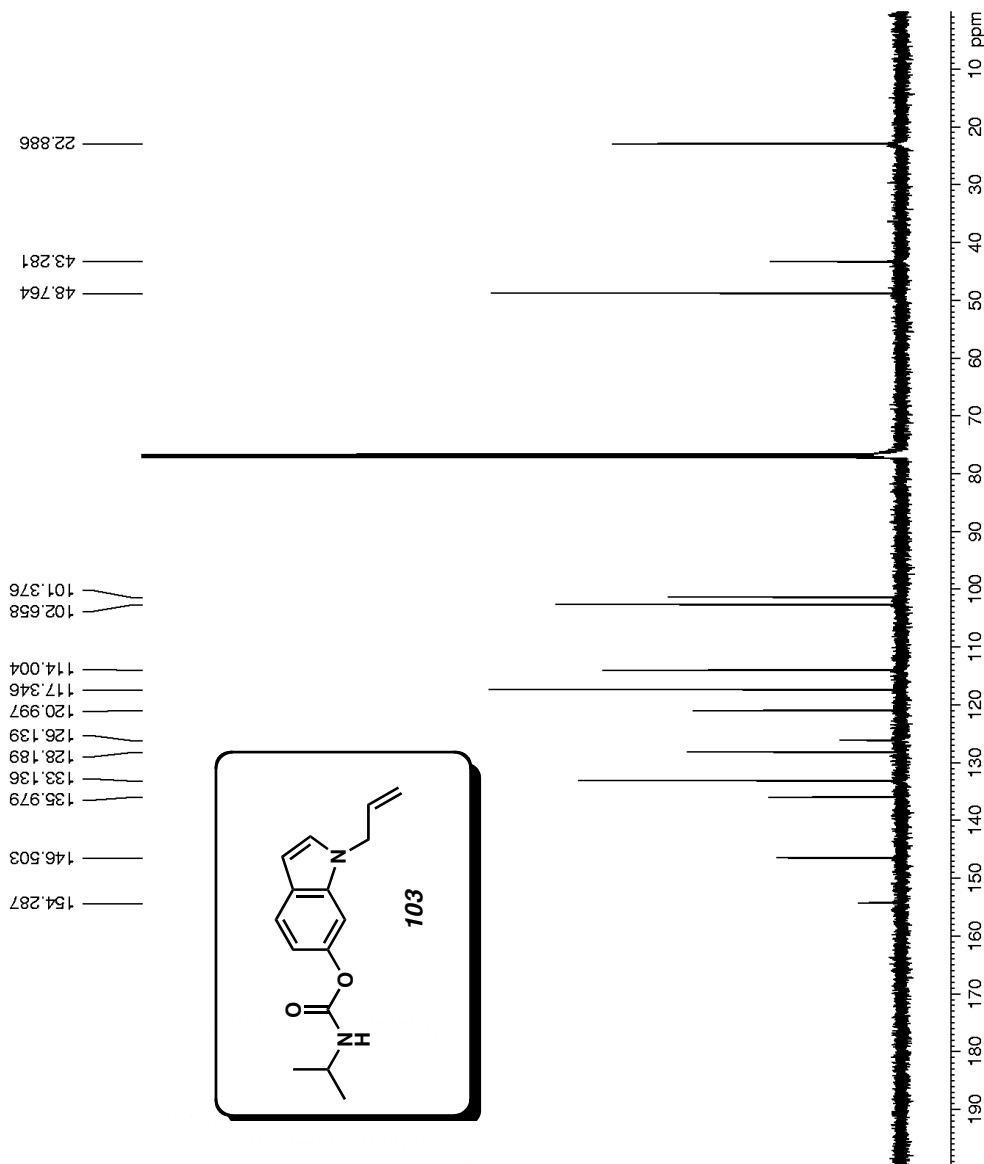

Current Data Parameters  
 NAME GJI-III-190  
 EXPNO 12  
 PROCNO 1

F2 - Acquisition Parameters  
 Date\_ 20100506  
 Time 3.05  
 INSTRUM avance500  
 PROBHD 5 mm bb-Z Z800  
 PULPROG zgpg30  
 TD 66536  
 SOLVENT CDCl3  
 NS 128  
 DS 0  
 SWH 32679.738 Hz  
 FIDRES 0.498653 Hz  
 AQ 1.0027661 sec  
 RG 4096  
 DW 15.300 usec  
 DE 6.00 usec  
 TE 298.8 K  
 D1 2.0000000 sec  
 d11 0.0300000 sec  
 MCREST 0.0000000 sec  
 MCWRK 0.01500000 sec

==== CHANNEL f1 =====  
 NUC1 13C  
 P1 6.20 usec  
 PL1 0.00 dB  
 SFO1 125.8231939 MHz

==== CHANNEL f2 =====  
 CPDPRG2 waltz16  
 NUC2 1H  
 PCPD2 100.00 usec  
 PL2 120.00 dB  
 PL12 16.10 dB  
 SFO2 500.3320013 MHz

F2 - Processing parameters  
 SI 65536  
 SF 125.8080969 MHz  
 WDW EM  
 SSB 0  
 LB 1.00 Hz  
 GB 0  
 PC 1.40

III-190 purified C13 128 s.

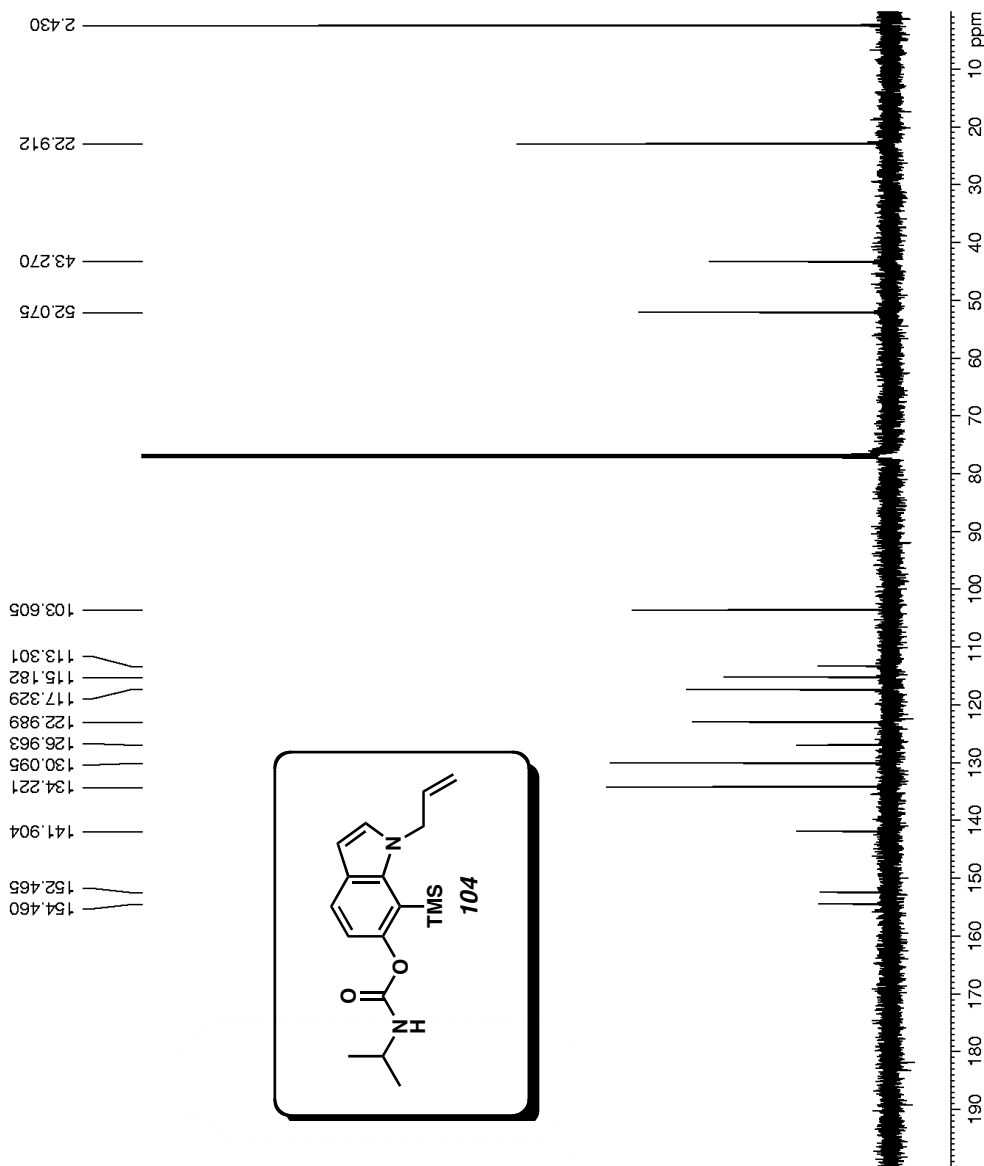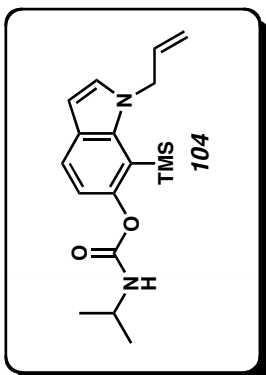

Current Data Parameters  
 NAME GJI-III-199  
 EXPNO 11  
 PROCNO 1

F2 - Acquisition Parameters  
 Date\_ 20100518  
 Time 10.10  
 INSTRUM aix500  
 PROBHD 5 mm broadband  
 PULPROG zgpg30  
 TD 66536  
 SOLVENT CDCl3  
 NS 256  
 DS 0  
 SWH 35714.285 Hz  
 FIDRES 0.544957 Hz  
 AQ 0.9175540 sec  
 RG 32768  
 DW 14.000 usec  
 DE 20.00 usec  
 TE 300.0 K  
 D12 0.000200 sec  
 DL5 17.70 dB  
 CPDPRG waltz16  
 P31 100.00 usec  
 D1 2.0000000 sec  
 P1 6.80 usec  
 SFO1 125.7728999 MHz  
 NUCLEUS 13C  
 D11 0.0300000 sec

F2 - Processing parameters  
 SI 32768  
 SF 125.7578090 MHz  
 WDW EM  
 SSB 0  
 LB 1.00 Hz  
 GB 0  
 PC 1.40

GJI-III-199 purified C13

151.006  
 142.034  
 133.308  
 131.907  
 128.696  
 122.416  
 119.867  
 117.819  
 117.318  
 115.524  
 114.769  
 113.669

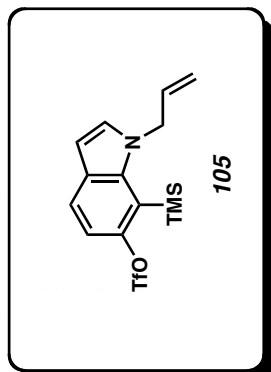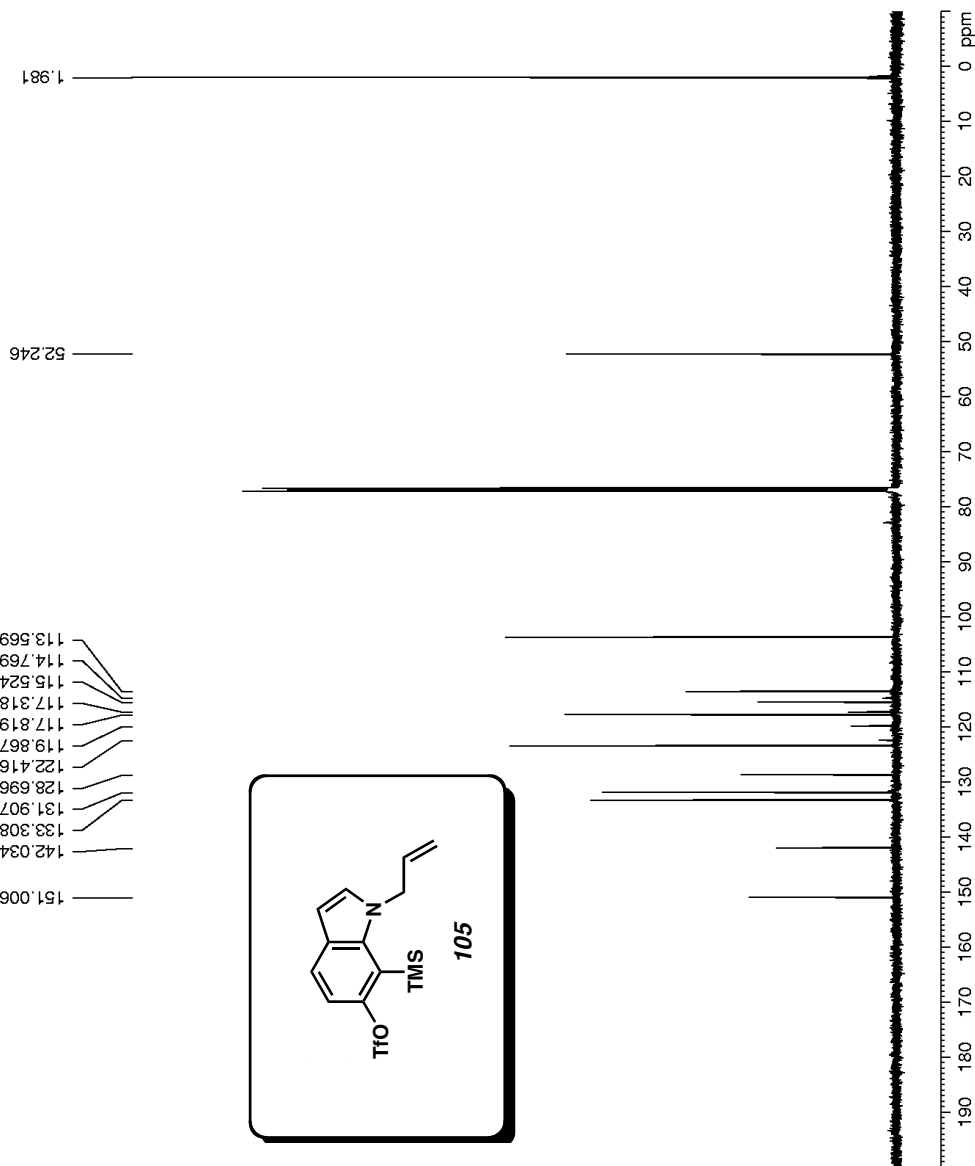



Current Data Parameters  
 NAME AEG-1-195aC13-4  
 EXPNO 1  
 PROCNO 1

F2 - Acquisition Parameters

Date\_ 20100520  
 Time 2.41  
 INSTRUM advance500  
 PROBHD 5 mm bb-Z Z800  
 PULPROG zgpg30  
 TD 68536  
 SOLVENT CDCl3  
 NS 15209  
 DS 0  
 SWH 32679.738 Hz  
 FIDRES 0.498653 Hz  
 AQ 1.0027661 sec  
 RG 4096  
 DW 15.300 usec  
 DE 6.00 usec  
 TE 298.1 K  
 D1 2.0000000 sec  
 d11 0.0300000 sec  
 MCREST 0.0000000 sec  
 MCWRK 0.01500000 sec

==== CHANNEL f1 =====

NUC1 <sup>13</sup>C  
 P1 6.20 usec  
 PL1 0.00 dB  
 SFO1 125.8231939 MHz

==== CHANNEL f2 =====

CPDPRG2 waltz16  
 NUC2 <sup>1</sup>H  
 PCPD2 100.00 usec  
 PL2 120.00 dB  
 PL12 16.10 dB  
 SFO2 500.3320013 MHz

F2 - Processing parameters

SI 65536  
 SF 125.8080740 MHz  
 WDW EM  
 SSB 0  
 LB 1.00 Hz  
 GB 0  
 PC 1.40

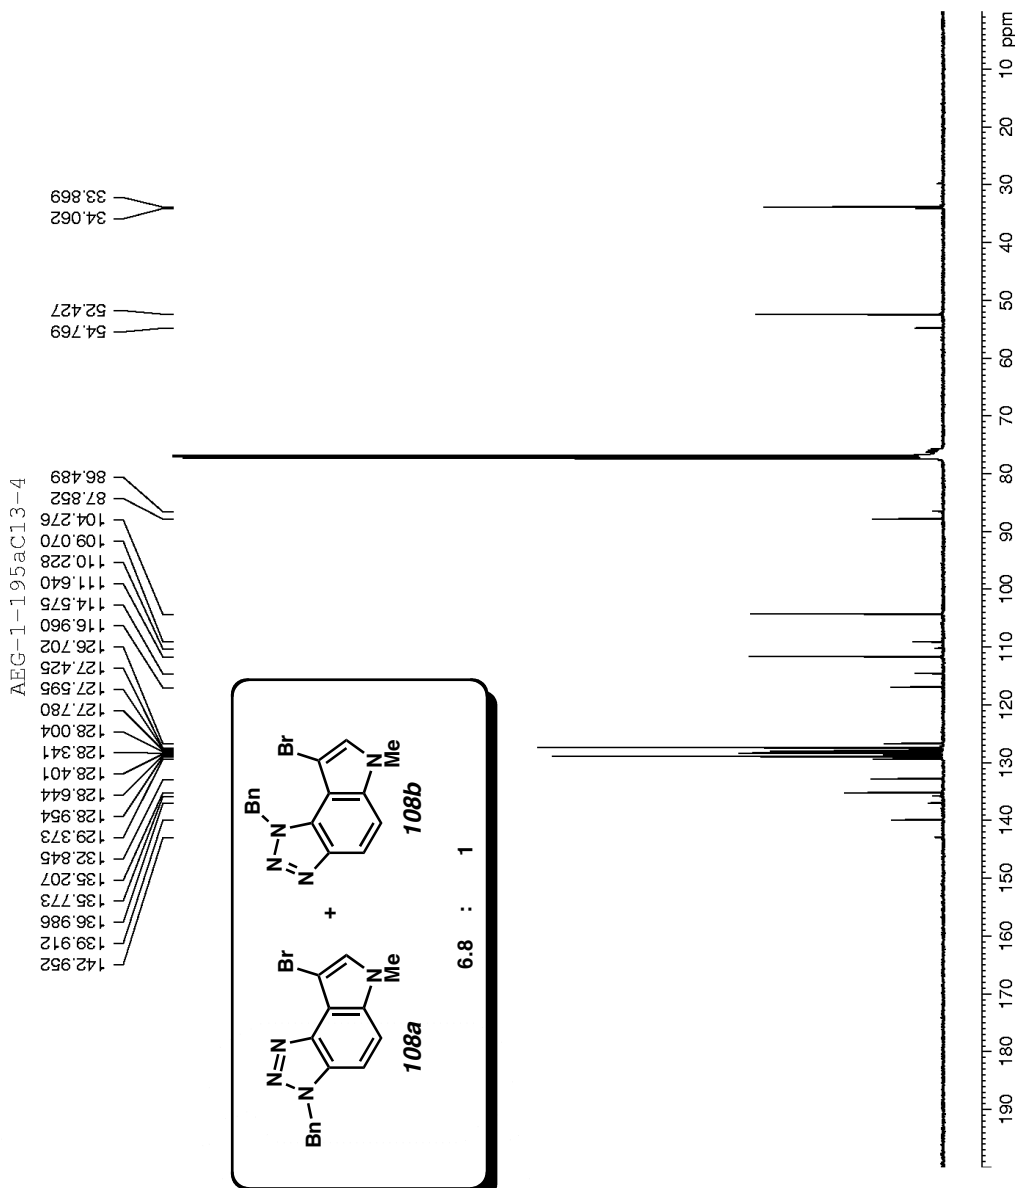

Current Data Parameters  
 NAME GJI-III-165  
 EXPNO 11  
 PROCNO 1

F2 - Acquisition Parameters  
 Date\_ 20100420  
 Time 20:51  
 INSTRUM aix500  
 PROBHD 5 mm broadband  
 PULPROG zgpg30  
 TD 68536  
 SOLVENT CDCl3  
 NS 128  
 DS 0  
 SWH 35714.285 Hz  
 FIDRES 0.544957 Hz  
 AQ 0.9175540 sec  
 RG 32768  
 DW 14.000 usec  
 DE 20.00 usec  
 TE 300.0 K  
 D12 0.000200 sec  
 DL5 17.70 dB  
 CPDPRG waltz16  
 P31 100.00 usec  
 D1 2.0000000 sec  
 P1 6.80 usec  
 SFO1 125.7728999 MHz  
 NUCLEUS 13C  
 D11 0.0300000 sec

F2 - Processing parameters  
 SI 32768  
 SF 125.7578090 MHz  
 EM  
 WDW 0  
 SSB 0  
 LB 1.00 Hz  
 GB 0  
 PC 1.40

GJI-III-165 purified C13

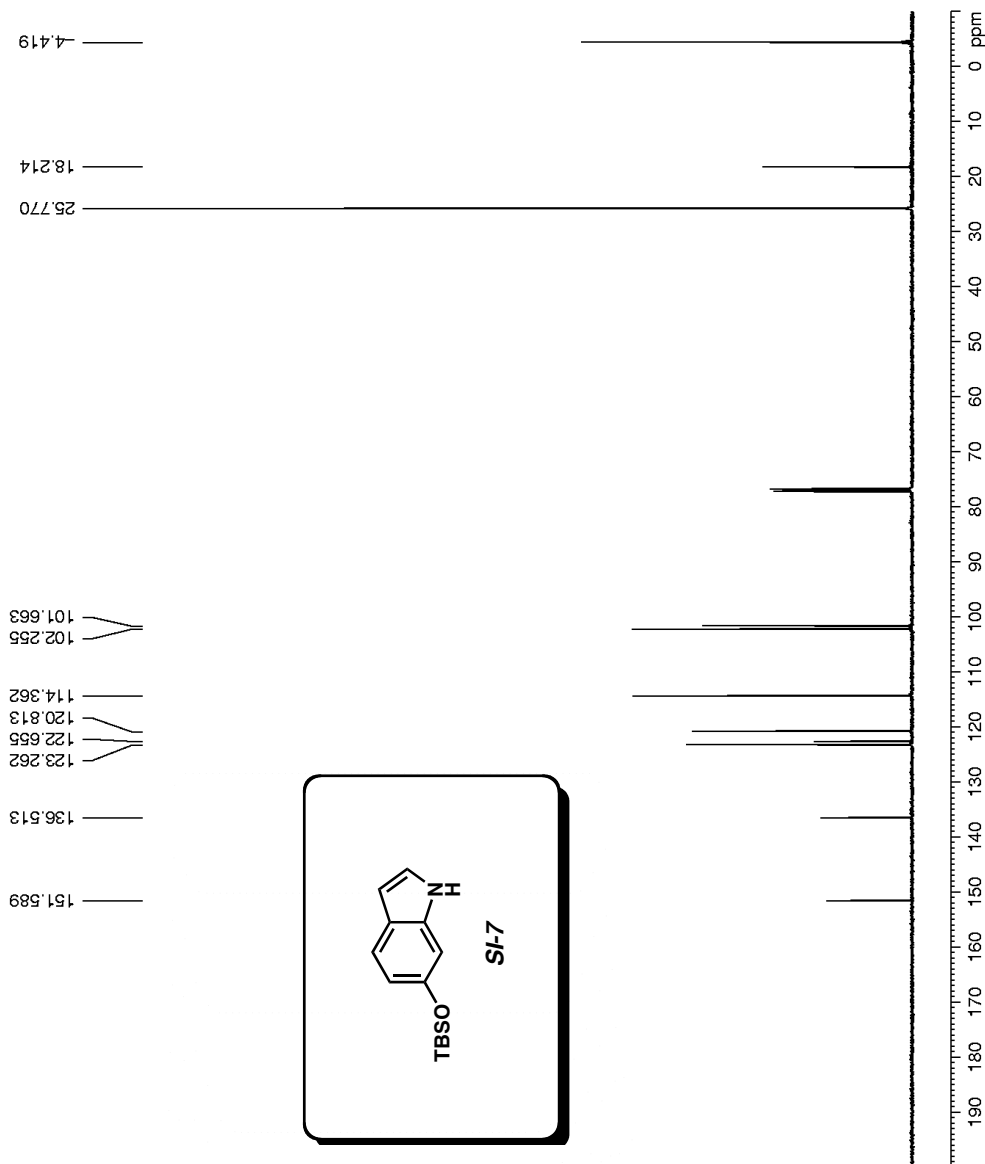

```

Current Data Parameters
NAME      GJI-III-112
EXPNO    21
PROCNO   1

F2 - Acquisition Parameters
Date_    20091230
Time     19.36
INSTRUM  avance500
PROBHD   5 mm bb-Z Z800
PULPROG  zgpg30
TD        68536
SOLVENT  CDCl3
NS        2048
DS        0
SWH       32679.738 Hz
FIDRES    0.498653 Hz
AQ         1.0027661 sec
RG         5792.6
DW         15.300 usec
DE         6.00 usec
TE         297.1 K
D1         2.0000000 sec
d11        0.0300000 sec
MCREST    0.0000000 sec
MCWRK     0.01500000 sec

===== CHANNEL f1 =====
NUC1      13C
P1         6.20 usec
PL1        0.00 dB
SFO1      125.8231939 MHz

===== CHANNEL f2 =====
CPDPRG2   waltz16
NUC2       1H
PCPD2     100.00 usec
PL2        120.00 dB
PL12       16.10 dB
SFO2      500.3320013 MHz

F2 - Processing parameters
SI         65536
SF         125.8080969 MHz
WDW        EM
SSB        0
LB         1.00 Hz
GB         0
PC         1.40
    
```

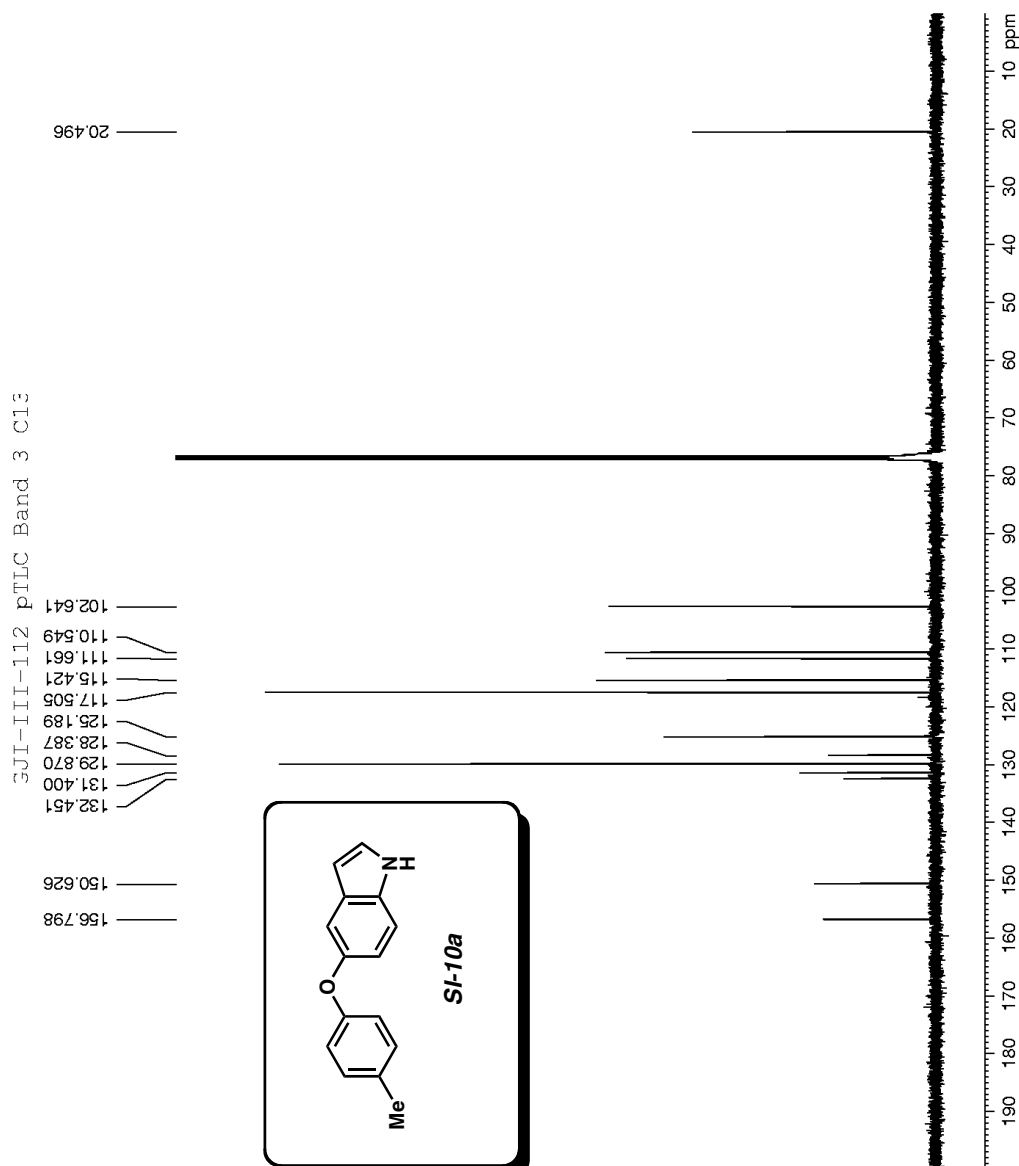

Current Data Parameters  
 NAME GJI-III-111  
 EXPNO 11  
 PROCNO 1

F2 - Acquisition Parameters  
 Date\_ 20100102  
 Time 1.20  
 INSTRUM avance500  
 PROBHD 5 mm bb-Z Z800  
 PULPROG zgpg30  
 TD 68536  
 SOLVENT CDCl3  
 NS 848  
 DS 0  
 SWH 32679.738 Hz  
 FIDRES 0.498653 Hz  
 AQ 1.0027661 sec  
 RG 4096  
 DW 15.300 usec  
 DE 6.00 usec  
 TE 297.1 K  
 D1 2.00000000 sec  
 d11 0.03000000 sec  
 MCREST 0.00000000 sec  
 MCWRK 0.01500000 sec

==== CHANNEL f1 =====  
 NUC1 <sup>13</sup>C  
 P1 6.20 usec  
 PL1 0.00 dB  
 SFO1 125.8231939 MHz

==== CHANNEL f2 =====  
 CPDPRG2 waltz16  
 NUC2 <sup>1</sup>H  
 PCPD2 100.00 usec  
 PL2 120.00 dB  
 PL12 16.10 dB  
 SFO2 500.3320013 MHz

F2 - Processing parameters  
 SI 65536  
 SF 125.8080969 MHz  
 WDW EM  
 SSB 0  
 LB 1.00 Hz  
 GB 0  
 PC 1.40

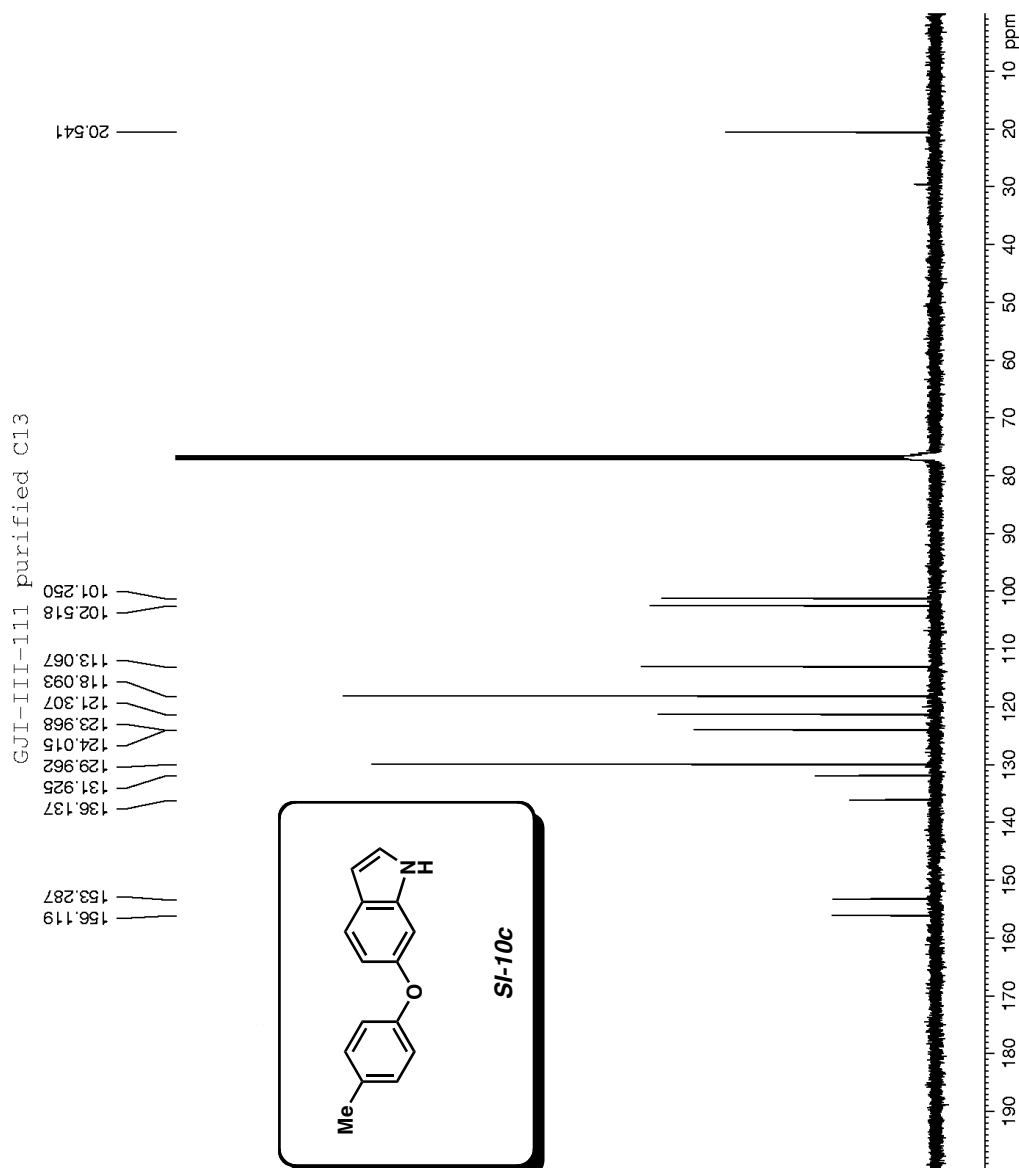

Current Data Parameters  
 NAME GJI-III-179183  
 EXPNO 11  
 PROCNO 1

F2 - Acquisition Parameters  
 Date\_ 20100507  
 Time 2.11  
 INSTRUM avance500  
 PROBHD 5 mm bb-Z Z800  
 PULPROG zgpg30  
 TD 68536  
 SOLVENT CDCl3  
 NS 16384  
 DS 0  
 SWH 32679.738 Hz  
 FIDRES 0.498653 Hz  
 AQ 1.0027661 sec  
 RG 11585.2  
 DW 15.300 usec  
 DE 6.00 usec  
 TE 298.7 K  
 D1 2.0000000 sec  
 d11 0.0300000 sec  
 MCREST 0.0000000 sec  
 MCWRK 0.01500000 sec

==== CHANNEL f1 =====  
 NUC1 <sup>13</sup>C  
 P1 6.20 usec  
 PL1 0.00 dB  
 SFO1 125.8231939 MHz

==== CHANNEL f2 =====  
 CPDPRG2 waltz16  
 NUC2 <sup>1</sup>H  
 PCPD2 100.00 usec  
 PL2 120.00 dB  
 PL12 16.10 dB  
 SFO2 500.3320013 MHz

F2 - Processing parameters  
 SI 65536  
 SF 125.8080969 MHz  
 WDW EM  
 SSB 0  
 LB 3.00 Hz  
 GB 0  
 PC 1.40

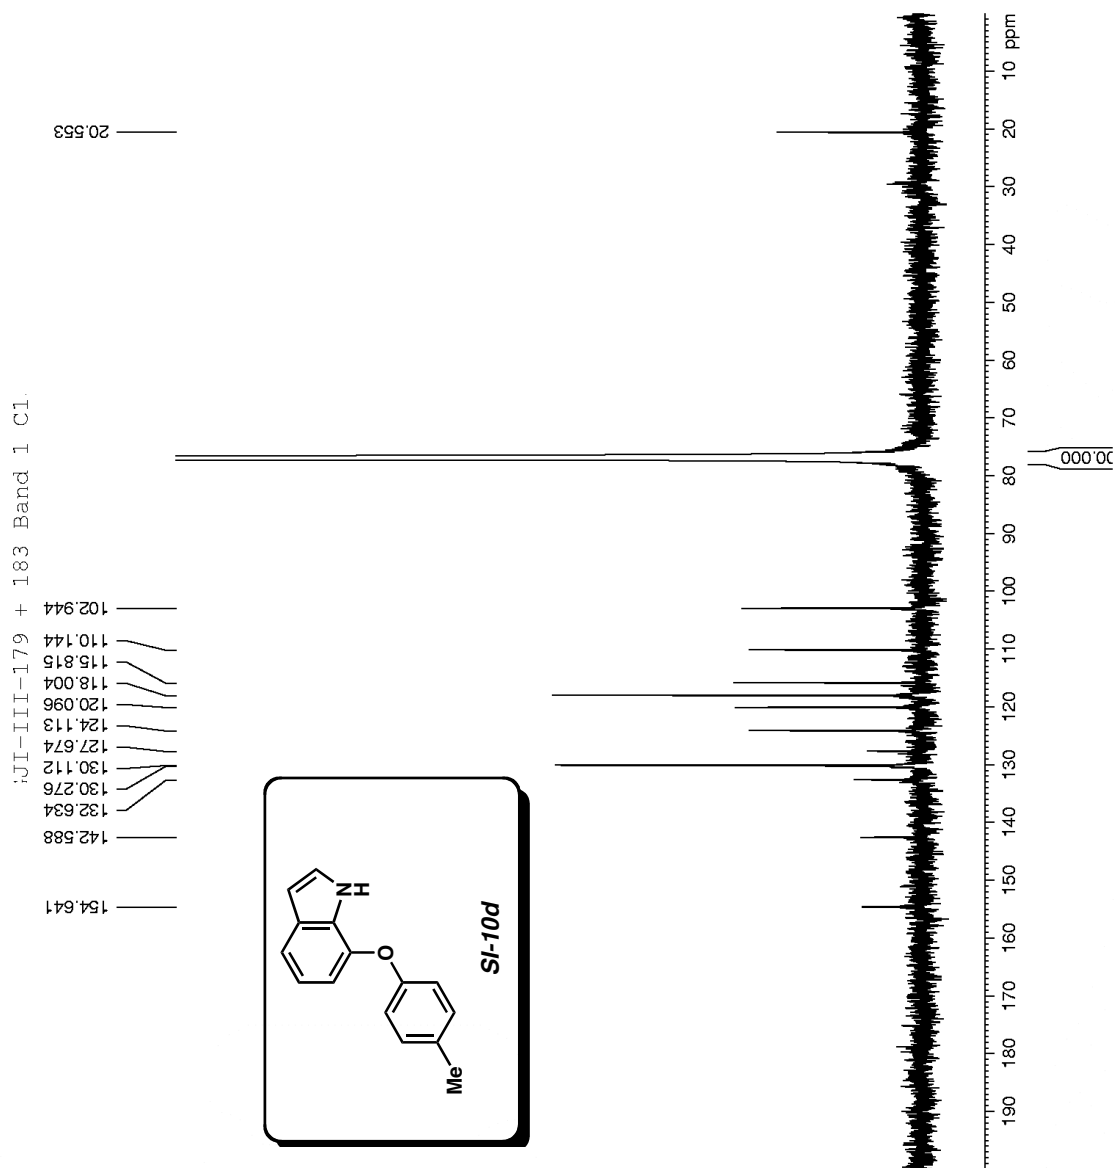

```

Current Data Parameters
NAME      GJI-III-113
EXPNO     41
PROCNO    1

F2 - Acquisition Parameters
Date_     20091230
Time      2.55
INSTRUM   avance500
PROBHD    5 mm bb-Z Z800
PULPROG   zgpg30
TD         68536
SOLVENT   CDCl3
NS         2048
DS         0
SWH        32679.738 Hz
FIDRES     0.498653 Hz
AQ         1.0027661 sec
RG         4096
DW         15.300 usec
DE         6.00 usec
TE         313.0 K
D1         2.0000000 sec
d11        0.03000000 sec
MCREST     0.00000000 sec
MCWRK     0.01500000 sec

===== CHANNEL f1 =====
NUC1       13C
P1         6.20 usec
PL1        0.00 dB
SFO1       125.8231939 MHz

===== CHANNEL f2 =====
CPDPRG2    waltz16
NUC2       1H
PCPD2      100.00 usec
PL2        120.00 dB
PL12       16.10 dB
SFO2       500.3320013 MHz

F2 - Processing parameters
SI         65536
SF         125.8080969 MHz
WDW        EM
SSB        0
LB         1.00 Hz
GB         0
PC         1.40
    
```

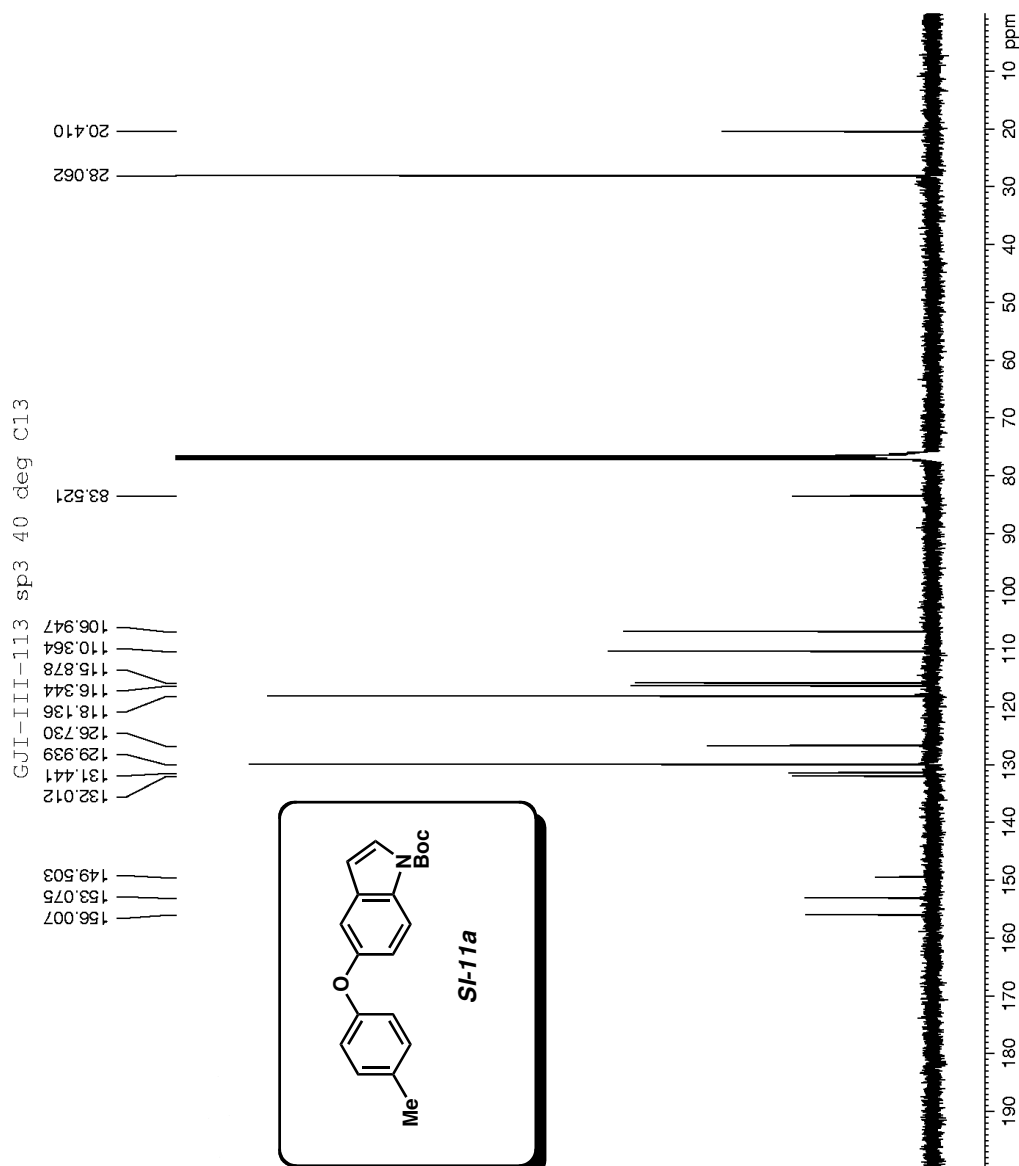

Current Data Parameters  
 NAME GJI-III-76  
 EXPNO 11  
 PROCNO 1

F2 - Acquisition Parameters  
 Date\_ 20091023  
 Time 18.23  
 INSTRUM avance500  
 PROBHD 5 mm bb-Z Z800  
 PULPROG zgpg30  
 TD 68536  
 SOLVENT CDCl3  
 NS 1024  
 DS 0  
 SWH 32679.738 Hz  
 FIDRES 0.498653 Hz  
 AQ 1.0027661 sec  
 RG 14596.5  
 DW 15.300 usec  
 DE 6.00 usec  
 TE 296.6 K  
 D1 2.00000000 sec  
 d11 0.03000000 sec  
 MCREST 0.00000000 sec  
 MCWRK 0.01500000 sec

==== CHANNEL f1 =====  
 NUC1 13C  
 P1 6.20 usec  
 PL1 0.00 dB  
 SFO1 125.8231939 MHz

==== CHANNEL f2 =====  
 CPDPRG2 waltz16  
 NUC2 1H  
 PCPD2 100.00 usec  
 PL2 120.00 dB  
 PL12 16.10 dB  
 SFO2 500.3320013 MHz

F2 - Processing parameters  
 SI 65536  
 SF 125.8080969 MHz  
 WDW EM  
 SSB 0  
 LB 3.00 Hz  
 GB 0  
 PC 1.40

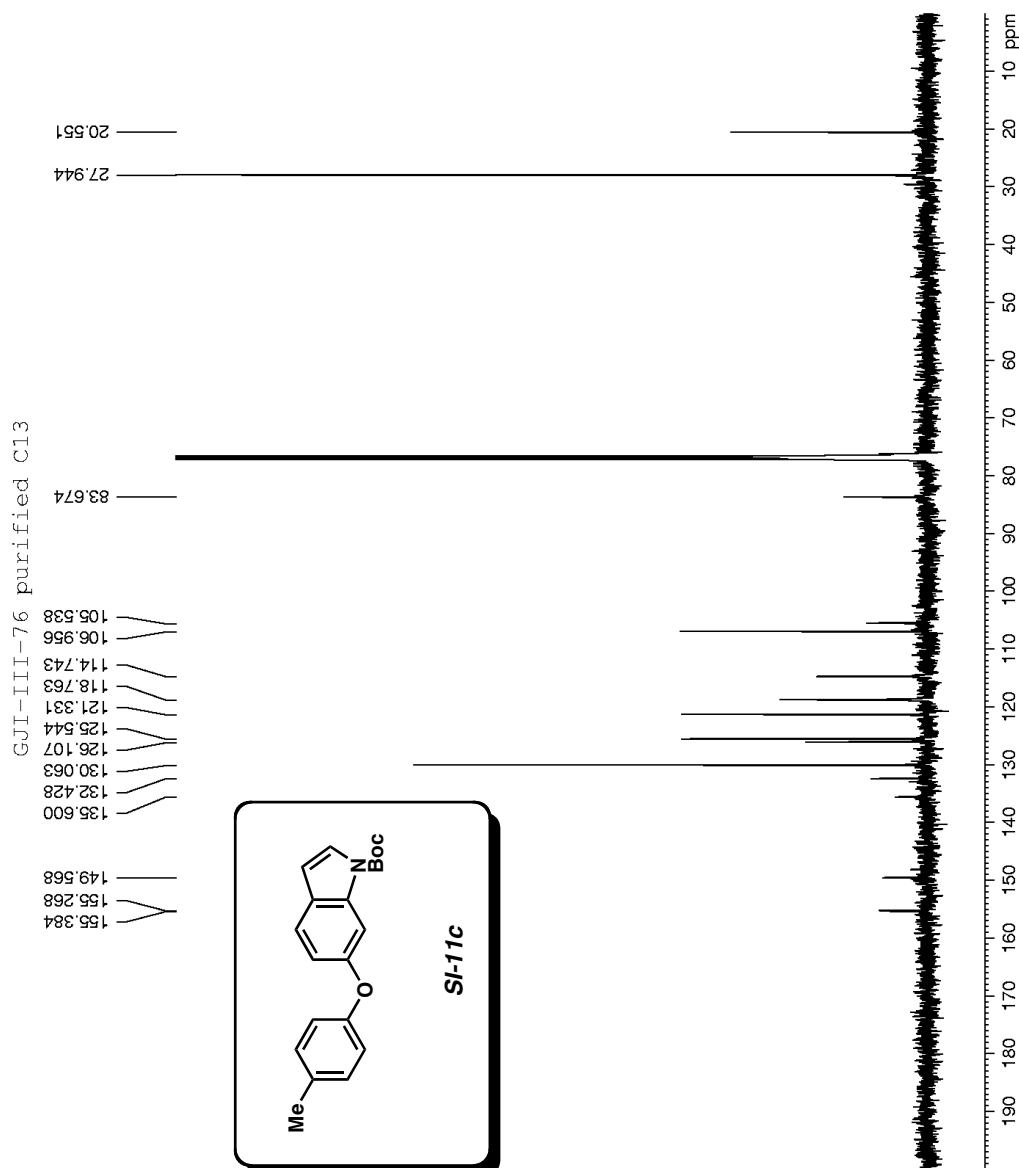

Current Data Parameters  
 NAME GJI-III-102  
 EXPNO 41  
 PROCNO 1

F2 - Acquisition Parameters  
 Date\_ 20091221  
 Time 3.34  
 INSTRUM avance500  
 PROBHD 5 mm bb-Z Z800  
 PULPROG zgpg30  
 TD 68536  
 SOLVENT CDCl3  
 NS 1024  
 DS 0  
 SWH 32679.738 Hz  
 FIDRES 0.498653 Hz  
 AQ 1.0027661 sec  
 RG 4096  
 DW 15.300 usec  
 DE 6.00 usec  
 TE 297.7 K  
 D1 2.0000000 sec  
 d11 0.03000000 sec  
 MCREST 0.00000000 sec  
 MCWRK 0.01500000 sec

==== CHANNEL f1 =====  
 NUC1 13C  
 P1 6.20 usec  
 PL1 0.00 dB  
 SFO1 125.8231939 MHz

==== CHANNEL f2 =====  
 CPDPRG2 waltz16  
 NUC2 1H  
 PCPD2 100.00 usec  
 PL2 120.00 dB  
 PL12 16.10 dB  
 SFO2 500.3320013 MHz

F2 - Processing parameters  
 SI 65536  
 SF 125.8080969 MHz  
 WDW EM  
 SSB 0  
 LB 1.00 Hz  
 GB 0  
 PC 1.40

3JI-III-102 pTLC Band 3 C13

146.142  
 138.048  
 132.565  
 129.126  
 128.488  
 124.818  
 118.920  
 118.221  
 115.178  
 113.034  
 111.499  
 102.321

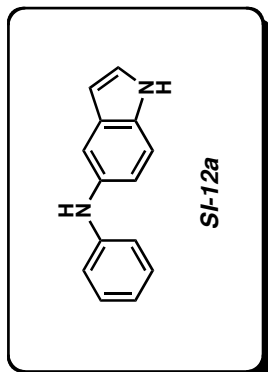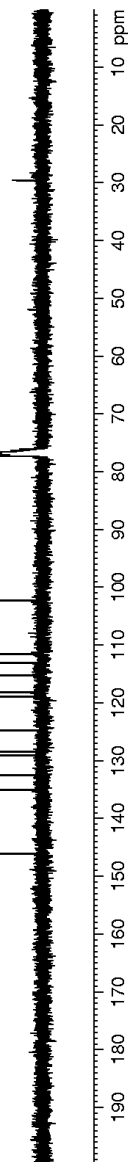



Current Data Parameters  
 NAME GJI-III-117  
 EXPNO 11  
 PROCNO 1

F2 - Acquisition Parameters  
 Date\_ 20100104  
 Time 19.13  
 INSTRUM avance500  
 PROBHD 5 mm bb-Z Z800  
 PULPROG zgpg30  
 TD 68536  
 SOLVENT CDCl3  
 NS 128  
 DS 0  
 SWH 32679.738 Hz  
 FIDRES 0.498653 Hz  
 AQ 1.0027661 sec  
 RG 4096  
 DW 15.300 usec  
 DE 6.00 usec  
 TE 297.0 K  
 D1 2.0000000 sec  
 d11 0.0300000 sec  
 MCREST 0.0000000 sec  
 MCWRK 0.01500000 sec

==== CHANNEL f1 =====  
 NUC1 <sup>13</sup>C  
 P1 6.20 usec  
 PL1 0.00 dB  
 SFO1 125.8231939 MHz

==== CHANNEL f2 =====  
 CPDPRG2 waltz16  
 NUC2 <sup>1</sup>H  
 PCPD2 100.00 usec  
 PL2 120.00 dB  
 PL12 16.10 dB  
 SFO2 500.3320013 MHz

F2 - Processing parameters  
 SI 65536  
 SF 125.8080969 MHz  
 WDW EM  
 SSB 0  
 LB 1.00 Hz  
 GB 0  
 PC 1.40

GJI-III-117 purified C13

144.869  
 137.867  
 136.484  
 129.221  
 123.460  
 123.376  
 121.217  
 119.742  
 116.311  
 114.754  
 102.498  
 101.585

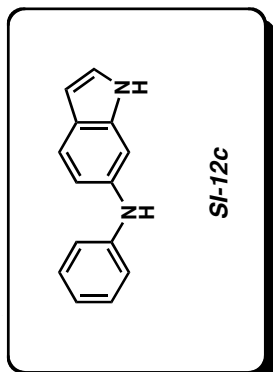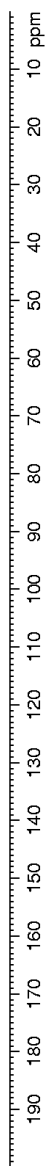

Current Data Parameters  
 NAME GJI-III-103  
 EXPNO 101  
 PROCNO 1

F2 - Acquisition Parameters  
 Date\_ 20100602  
 Time 16.33  
 INSTRUM avance500  
 PROBHD 5 mm bb-Z Z800  
 PULPROG zgpg30  
 TD 68536  
 SOLVENT CDCl3  
 NS 8192  
 DS 0  
 SWH 32679.738 Hz  
 FIDRES 0.498653 Hz  
 AQ 1.0027661 sec  
 RG 4096  
 DW 15.300 usec  
 DE 6.00 usec  
 TE 298.4 K  
 D1 2.0000000 sec  
 d11 0.03000000 sec  
 MCREST 0.00000000 sec  
 MCWRK 0.01500000 sec

==== CHANNEL f1 =====  
 NUC1 13C  
 P1 6.20 usec  
 PL1 0.00 dB  
 SFO1 125.8231939 MHz

==== CHANNEL f2 =====  
 CPDPRG2 waltz16  
 NUC2 1H  
 PCPD2 100.00 usec  
 PL2 120.00 dB  
 PL12 16.10 dB  
 SFO2 500.3320013 MHz

F2 - Processing parameters  
 SI 65536  
 SF 125.8080969 MHz  
 WDW EM  
 SSB 0  
 LB 1.00 Hz  
 GB 0  
 PC 1.40

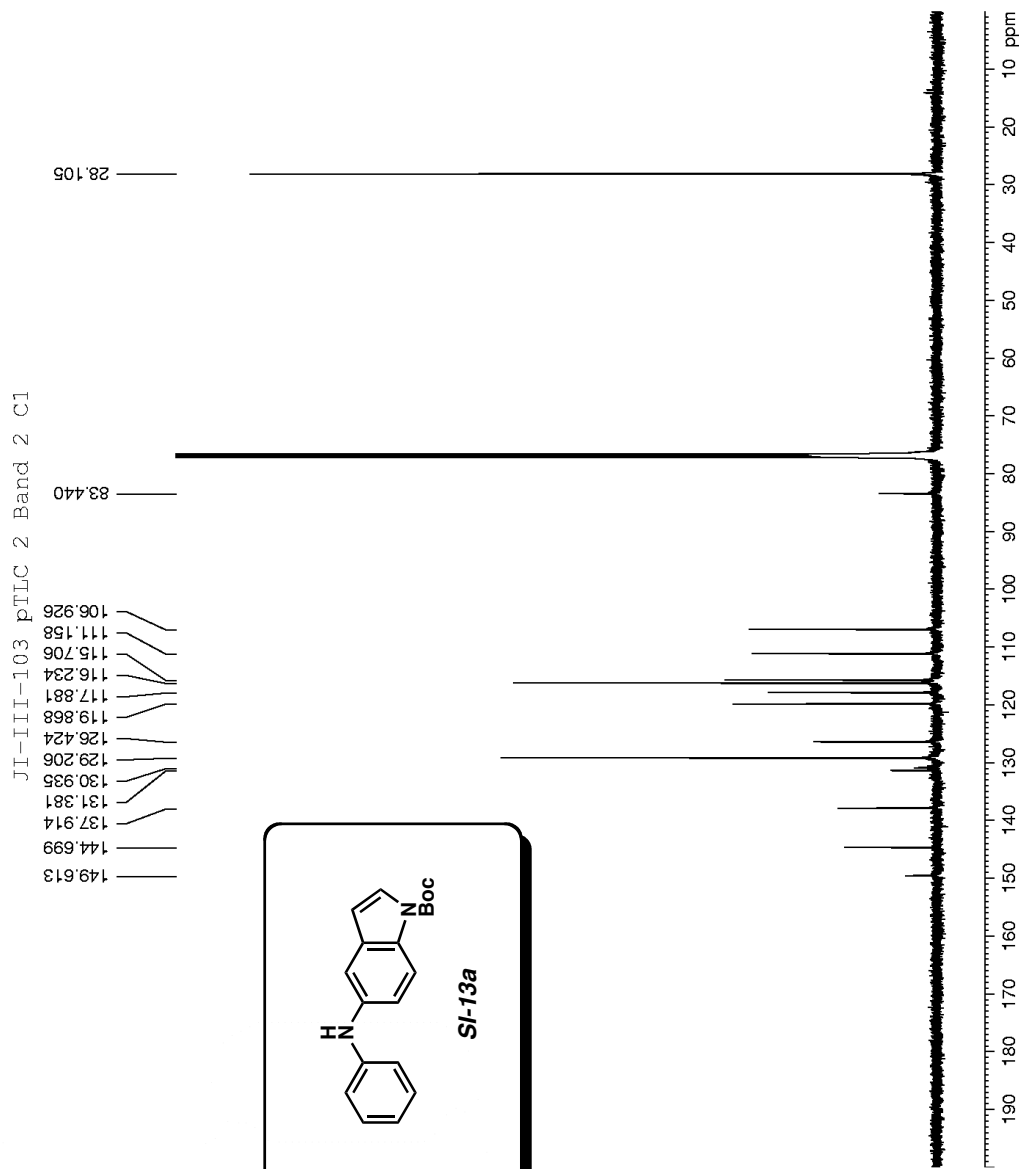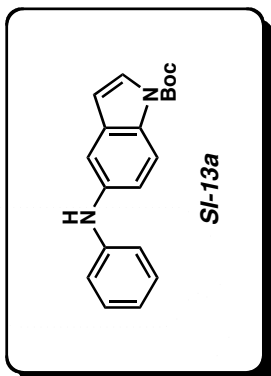

Current Data Parameters  
 NAME GJI-III-114  
 EXPNO 11  
 PROCNO 1

F2 – Acquisition Parameters  
 Date\_ 20100102  
 Time 2.20  
 INSTRUM avance500  
 PROBHD 5 mm bb-Z Z800  
 PULPROG zgpg30  
 TD 68536  
 SOLVENT CDCl3  
 NS 512  
 DS 0  
 SWH 32679.738 Hz  
 FIDRES 0.498653 Hz  
 AQ 1.0027661 sec  
 RG 8192  
 DW 15.300 usec  
 DE 6.00 usec  
 TE 313.0 K  
 D1 2.0000000 sec  
 d11 0.03000000 sec  
 MCREST 0.00000000 sec  
 MCWRK 0.01500000 sec

===== CHANNEL f1 =====  
 NUC1 <sup>13</sup>C  
 P1 6.20 usec  
 PL1 0.00 dB  
 SFO1 125.8231939 MHz

===== CHANNEL f2 =====  
 CPDPRG2 waltz16  
 NUC2 <sup>1</sup>H  
 PCPD2 100.00 usec  
 PL2 120.00 dB  
 PL12 16.10 dB  
 SFO2 500.3320013 MHz

F2 – Processing parameters  
 SI 65536  
 SF 125.8080969 MHz  
 WDW EM  
 SSB 0  
 LB 1.00 Hz  
 GB 0  
 PC 1.40

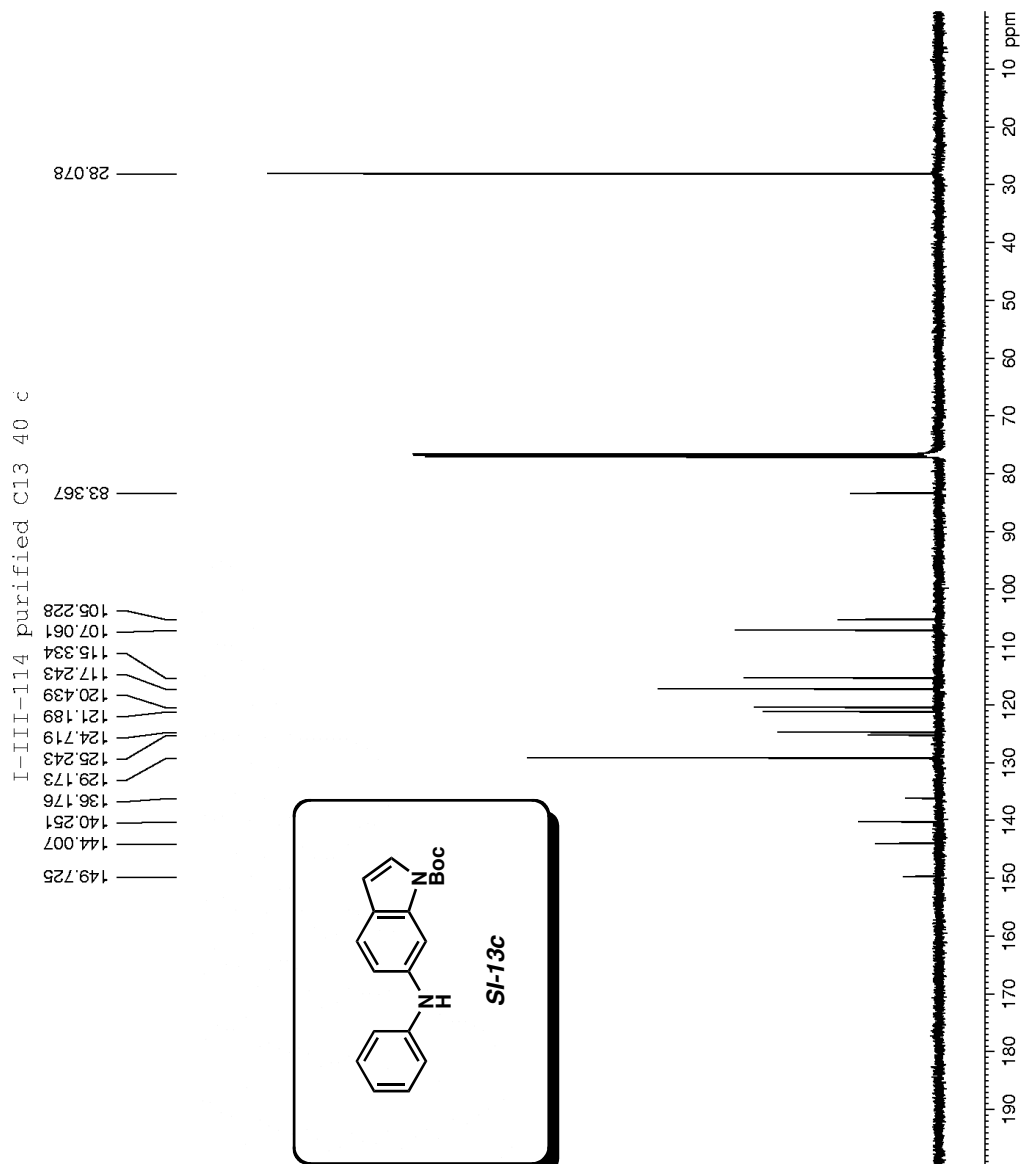

Current Data Parameters  
 NAME gjl-160carbon2  
 EXPNO 2  
 PROCNO 1

F2 - Acquisition Parameters  
 Date\_ 20100518  
 Time 5.13  
 INSTRUM avance500  
 PROBHHD 5 mm bb-Z Z800  
 PULPROG zgpg30  
 TD 68536  
 SOLVENT CDCl3  
 NS 13798  
 DS 0  
 SWH 32679.738 Hz  
 FIDRES 0.498653 Hz  
 AQ 1.0027661 sec  
 RG 4096  
 DW 15.300 usec  
 DE 6.00 usec  
 TE 298.0 K  
 D1 2.00000000 sec  
 d11 0.03000000 sec  
 MCREST 0.00000000 sec  
 MCWRK 0.01500000 sec

==== CHANNEL f1 =====  
 NUC1 13C  
 P1 6.20 usec  
 PL1 0.00 dB  
 SFO1 125.8231939 MHz

==== CHANNEL f2 =====  
 CPDPRG2 waltz16  
 NUC2 1H  
 PCPD2 100.00 usec  
 PL2 120.00 dB  
 PL12 16.10 dB  
 SFO2 500.3320013 MHz

F2 - Processing parameters  
 SI 65536  
 SF 125.8080969 MHz  
 WDW EM  
 SSB 0  
 LB 1.00 Hz  
 GB 0  
 PC 1.40

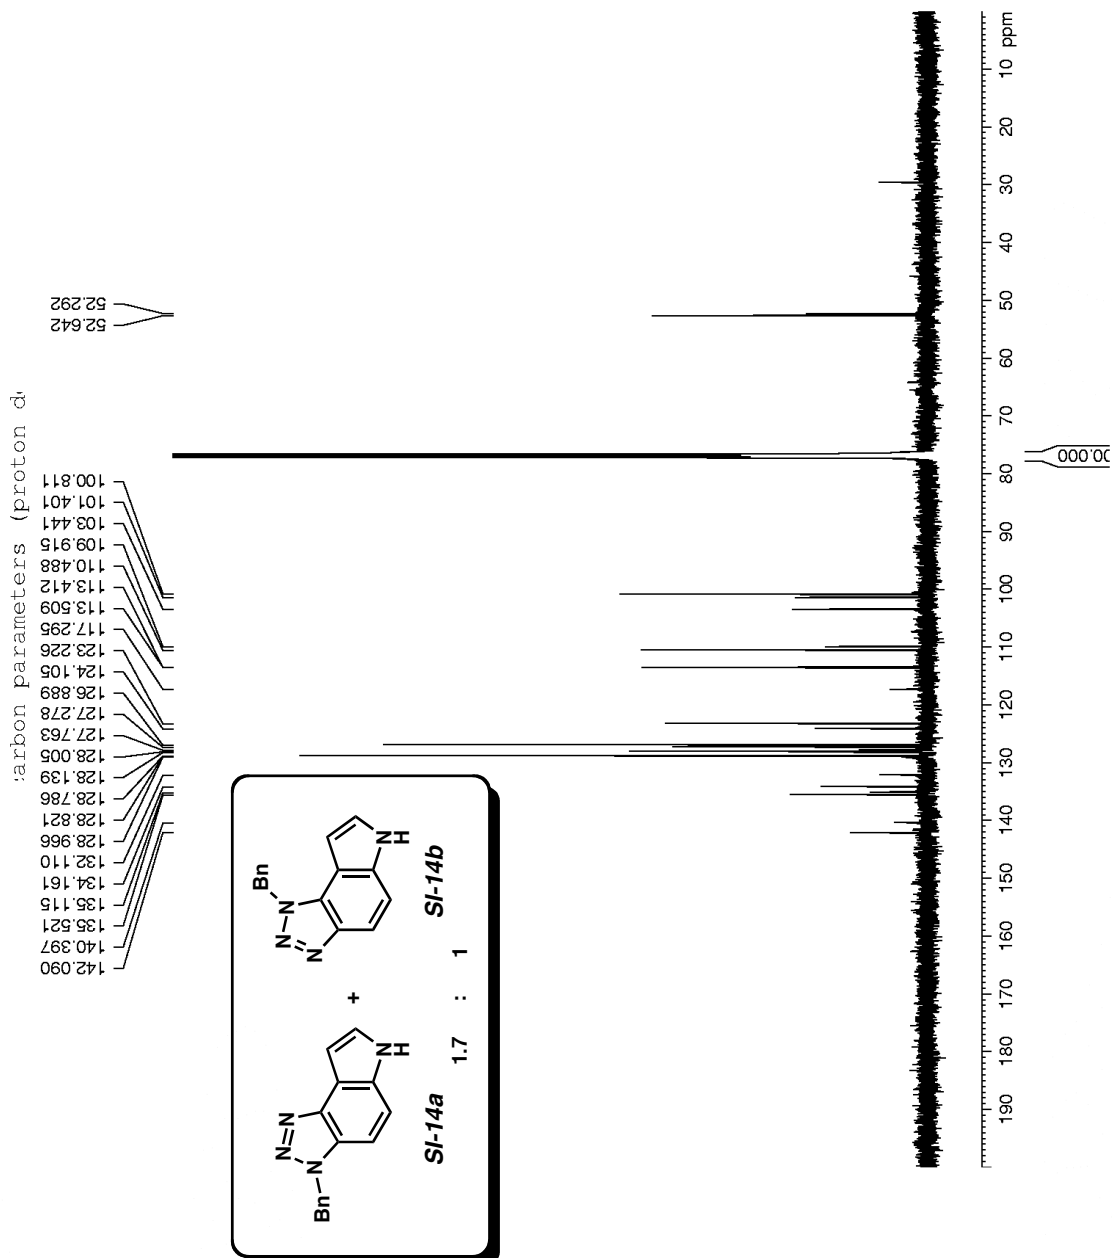

Current Data Parameters  
 NAME gym-2-17zc13  
 EXPNO 1  
 PROCNO 1

F2 - Acquisition Parameters  
 Date\_ 20100527  
 Time 21.11  
 INSTRUM aix500  
 PROBHD 5 mm broadband  
 PULPROG zgpg30  
 TD 68536  
 SOLVENT CDCl3  
 NS 14774  
 DS 0  
 SWH 35714.285 Hz  
 FIDRES 0.544957 Hz  
 AQ 0.9175540 sec  
 RG 32768  
 DW 14.000 usec  
 DE 20.00 usec  
 TE 300.0 K  
 D12 0.000200 sec  
 DL5 17.70 dB  
 CPDPRG waltz16  
 P31 100.00 usec  
 P1 2.0000000 sec  
 P1 6.80 usec  
 SFO1 125.7728999 MHz  
 NUCLEUS 13C  
 D11 0.0300000 sec

F2 - Processing parameters  
 SI 32768  
 SF 125.757741 MHz  
 WDW EM  
 SSB 0  
 LB 1.00 Hz  
 GB 0  
 PC 1.40

Chemical shift values (ppm) for C-13 with proto:

149.697  
 149.513  
 143.484  
 140.225  
 138.479  
 135.132  
 134.079  
 131.962  
 130.171  
 129.165  
 129.097  
 128.507  
 128.392  
 127.569  
 127.243  
 126.895  
 126.700  
 126.019  
 120.768  
 116.601  
 115.568  
 113.616  
 113.080  
 105.351  
 105.122  
 104.094  
 84.914  
 84.504

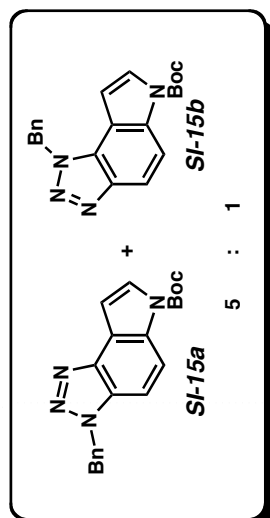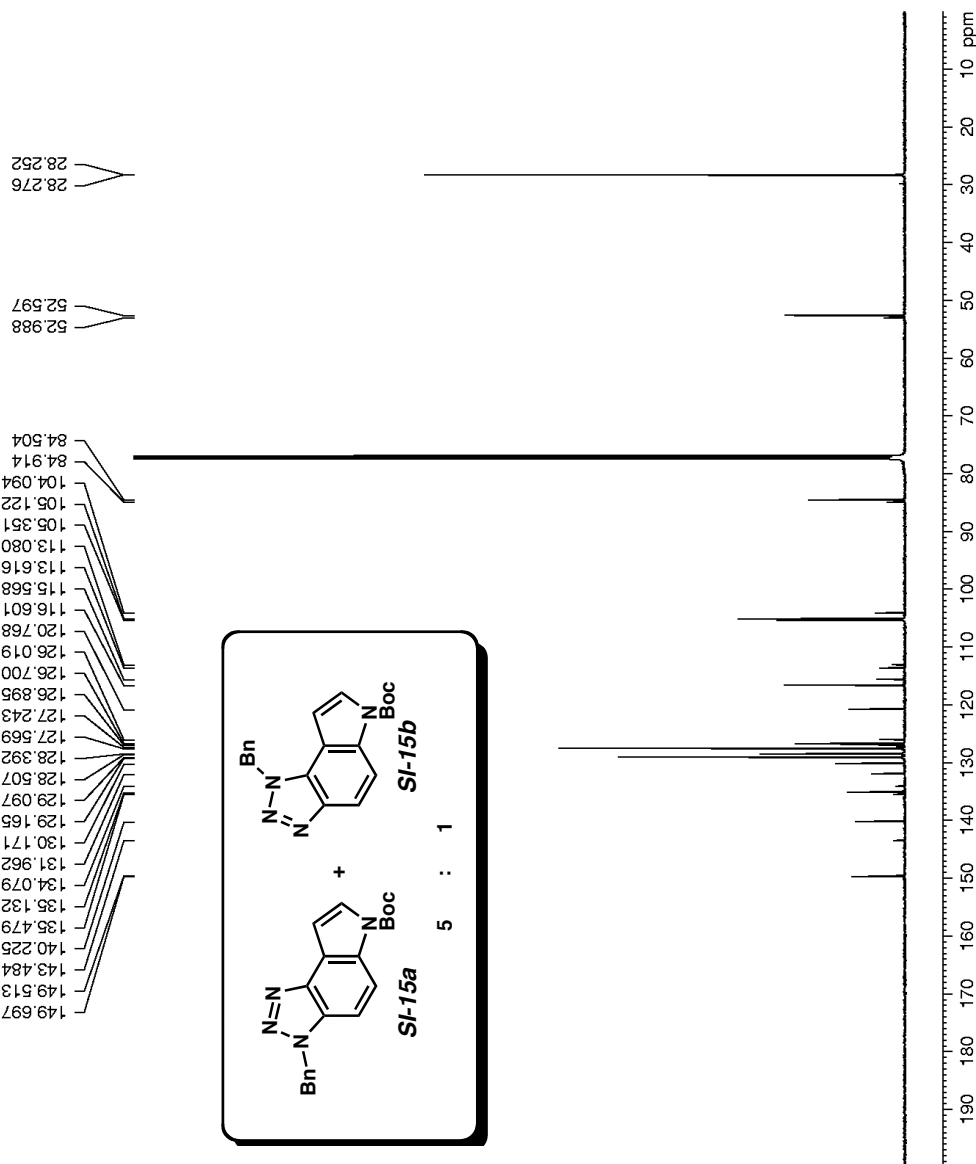

Current Data Parameters  
 NAME GJI-III-118  
 EXPNO 10  
 PROCNO 1

F2 - Acquisition Parameters  
 Date\_ 20100206  
 Time 14.41  
 INSTRUM aix500  
 PROBHD 5 mm broadband  
 PULPROG zg30  
 TD 66536  
 SOLVENT CDCl3  
 NS 16  
 DS 0  
 SWH 10000.000 Hz  
 FIDRES 0.152588 Hz  
 AQ 3.2768500 sec  
 RG 2860  
 DW 50.000 usec  
 DE 71.43 usec  
 TE 300.0 K  
 D1 2.0000000 sec  
 P1 12.20 usec  
 SFO1 500.1330008 MHz  
 NUCLEUS 1H

F2 - Processing parameters  
 SI 32768  
 SF 500.1300238 MHz  
 WDW EM  
 SSB 0  
 LB 0.30 Hz  
 GB 0  
 PC 1.00

GJI-III-118 Band 2

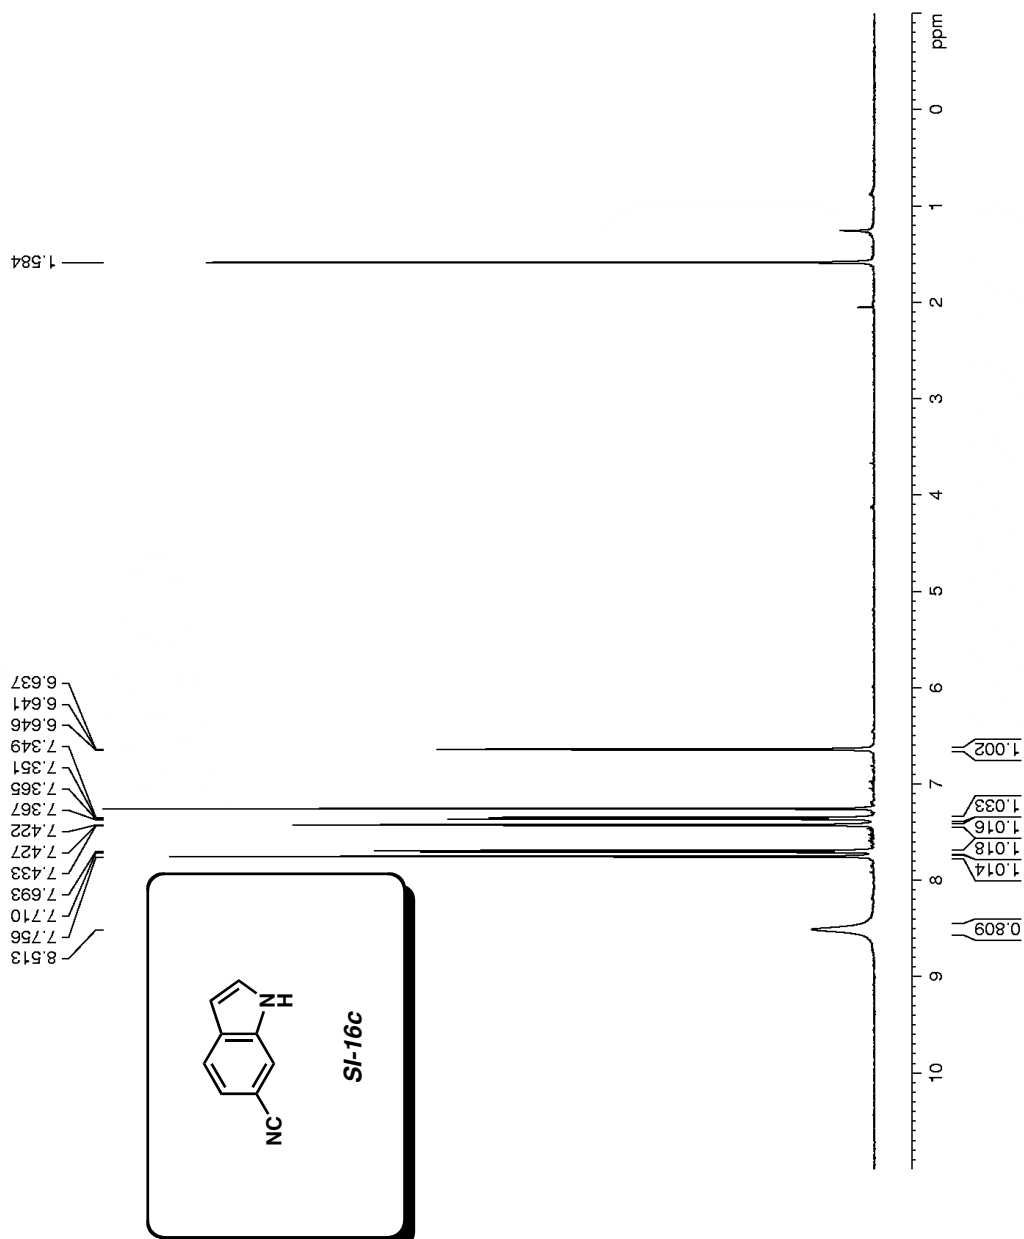

```

Current Data Parameters
NAME      GJI-II-164
EXPNO    31
PROCNO   1

F2 - Acquisition Parameters
Date_    20090422
Time     16.05
INSTRUM  avance500
PROBHD   5 mm bb-Z Z800
PULPROG  zgpg30
TD        68536
SOLVENT  CDCl3
NS        512
DS        0
SWH       32679.738 Hz
FIDRES    0.498653 Hz
AQ         1.0027661 sec
RG         912.3
DW         15.300 usec
DE         6.00 usec
TE         295.1 K
D1         2.0000000 sec
d11        0.0300000 sec
MCREST    0.0000000 sec
MCWRK     0.01500000 sec

===== CHANNEL f1 =====
NUC1      13C
P1         5.25 usec
PL1        0.00 dB
SFO1      125.8231939 MHz

===== CHANNEL f2 =====
CPDPRG2   waltz16
NUC2       1H
PCPD2     100.00 usec
PL2        120.00 dB
PL12       16.10 dB
SFO2      500.3320013 MHz

F2 - Processing parameters
SI         65536
SF        125.8080969 MHz
WDW        EM
SSB         0
LB         3.00 Hz
GB         0
PC         1.40
    
```

GJI-II-164 Band 2 C13

148.934  
136.952  
130.381  
127.954  
127.225  
125.694  
119.698  
115.899  
106.834  
105.956  
84.817

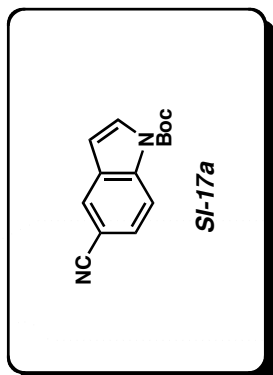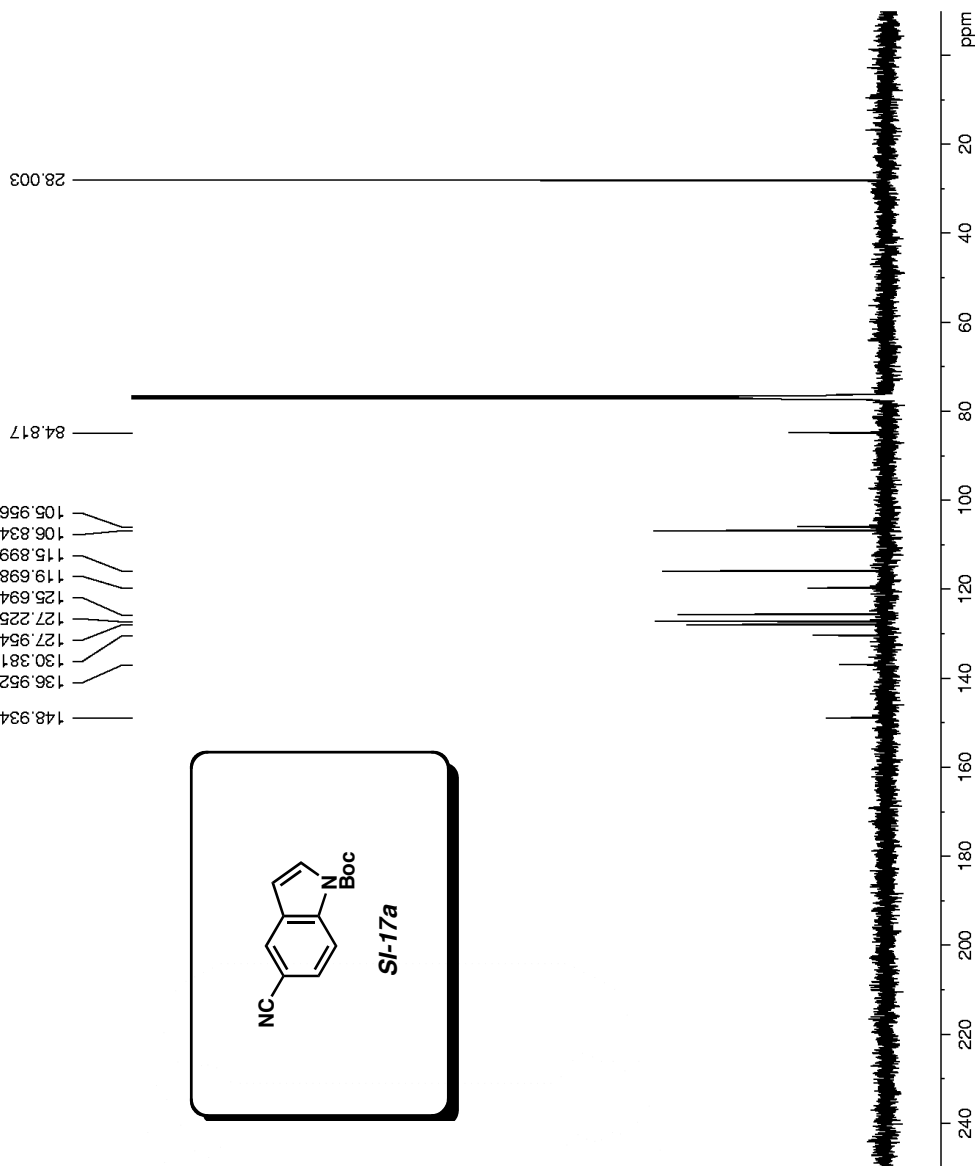

```

Current Data Parameters
NAME      GJI-III-181
EXPNO     11
PROCNO    1

F2 - Acquisition Parameters
Date_     20100430
Time      1.49
INSTRUM   avance500
PROBHD    5 mm bb-Z Z800
PULPROG   zgpg30
TD         68536
SOLVENT   CDCl3
NS         128
DS         0
SWH        32679.738 Hz
FIDRES     0.498653 Hz
AQ         1.0027661 sec
RG         13004
DW         15.300 usec
DE         6.00 usec
TE         312.3 K
D1         2.00000000 sec
d11        0.03000000 sec
MCREST     0.00000000 sec
MCWRK     0.01500000 sec

===== CHANNEL f1 =====
NUC1       13C
P1         6.20 usec
PL1        0.00 dB
SFO1       125.8231939 MHz

===== CHANNEL f2 =====
CPDPRG2    waltz16
NUC2        1H
PCPD2      100.00 usec
PL2         120.00 dB
PL12        16.10 dB
SFO2        500.3320013 MHz

F2 - Processing parameters
SI         65536
SF         125.8080969 MHz
WDW        EM
SSB        0
LB         3.00 Hz
GB         0
PC         1.40
    
```

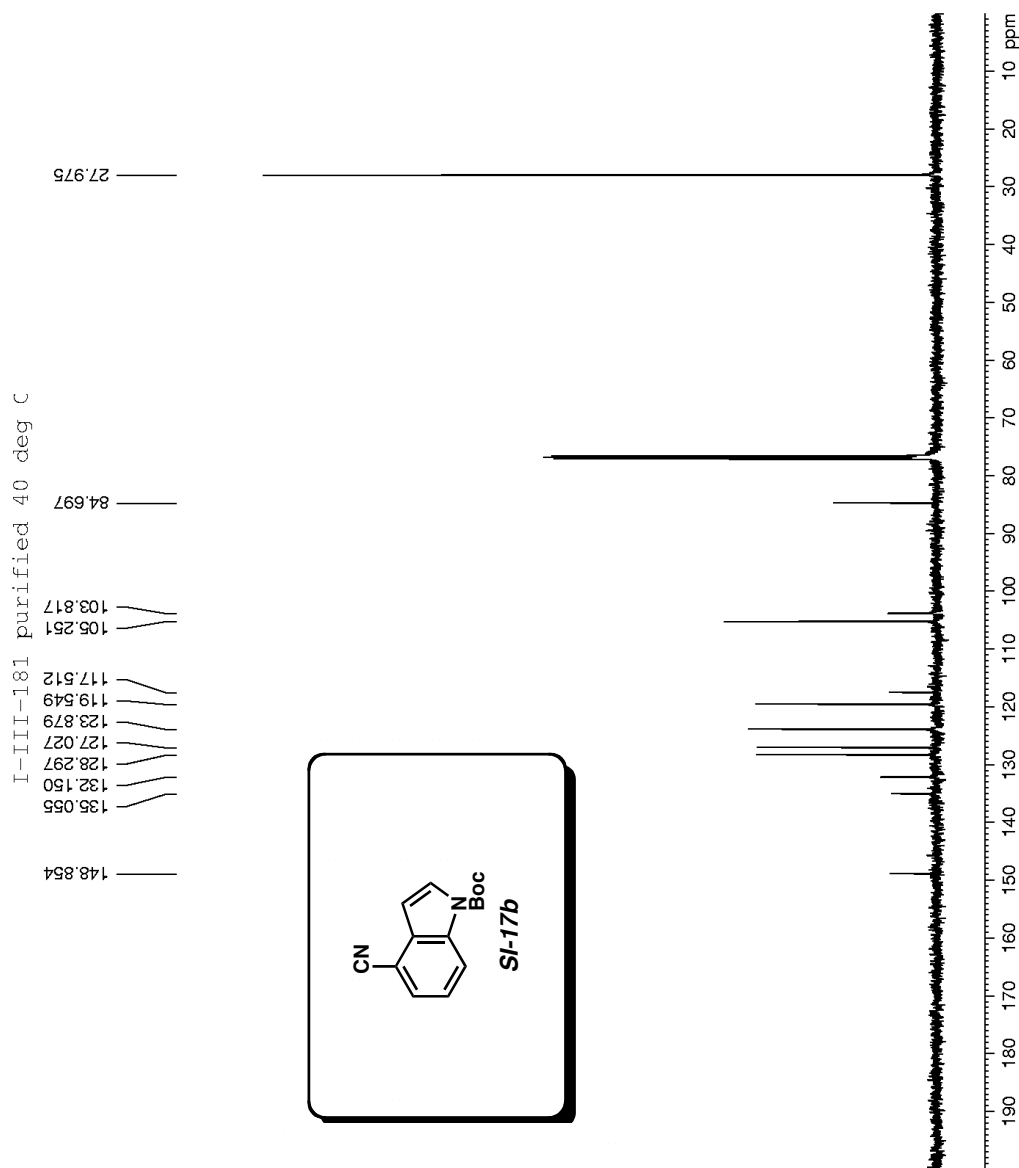



Current Data Parameters  
 NAME GJI-III-71  
 EXPNO 21  
 PROCNO 1

F2 - Acquisition Parameters  
 Date\_ 20091221  
 Time 1.22  
 INSTRUM avance500  
 PROBHD 5 mm bb-Z Z800  
 PULPROG zgpg30  
 TD 68536  
 SOLVENT CDCl3  
 NS 2048  
 DS 0  
 SWH 32679.738 Hz  
 FIDRES 0.498653 Hz  
 AQ 1.0027661 sec  
 RG 13004  
 DW 15.300 usec  
 DE 6.00 usec  
 TE 313.1 K  
 D1 2.0000000 sec  
 d11 0.0300000 sec  
 MCREST 0.0000000 sec  
 MCWRK 0.01500000 sec

==== CHANNEL f1 =====  
 NUC1 13C  
 P1 6.20 usec  
 PL1 0.00 dB  
 SFO1 125.8231939 MHz

==== CHANNEL f2 =====  
 CPDPRG2 waltz16  
 NUC2 1H  
 PCPD2 100.00 usec  
 PL2 120.00 dB  
 PL12 16.10 dB  
 SFO2 500.3320013 MHz

F2 - Processing parameters  
 SI 65536  
 SF 125.8080969 MHz  
 WDW EM  
 SSB 0  
 LB 1.00 Hz  
 GB 0  
 PC 1.40

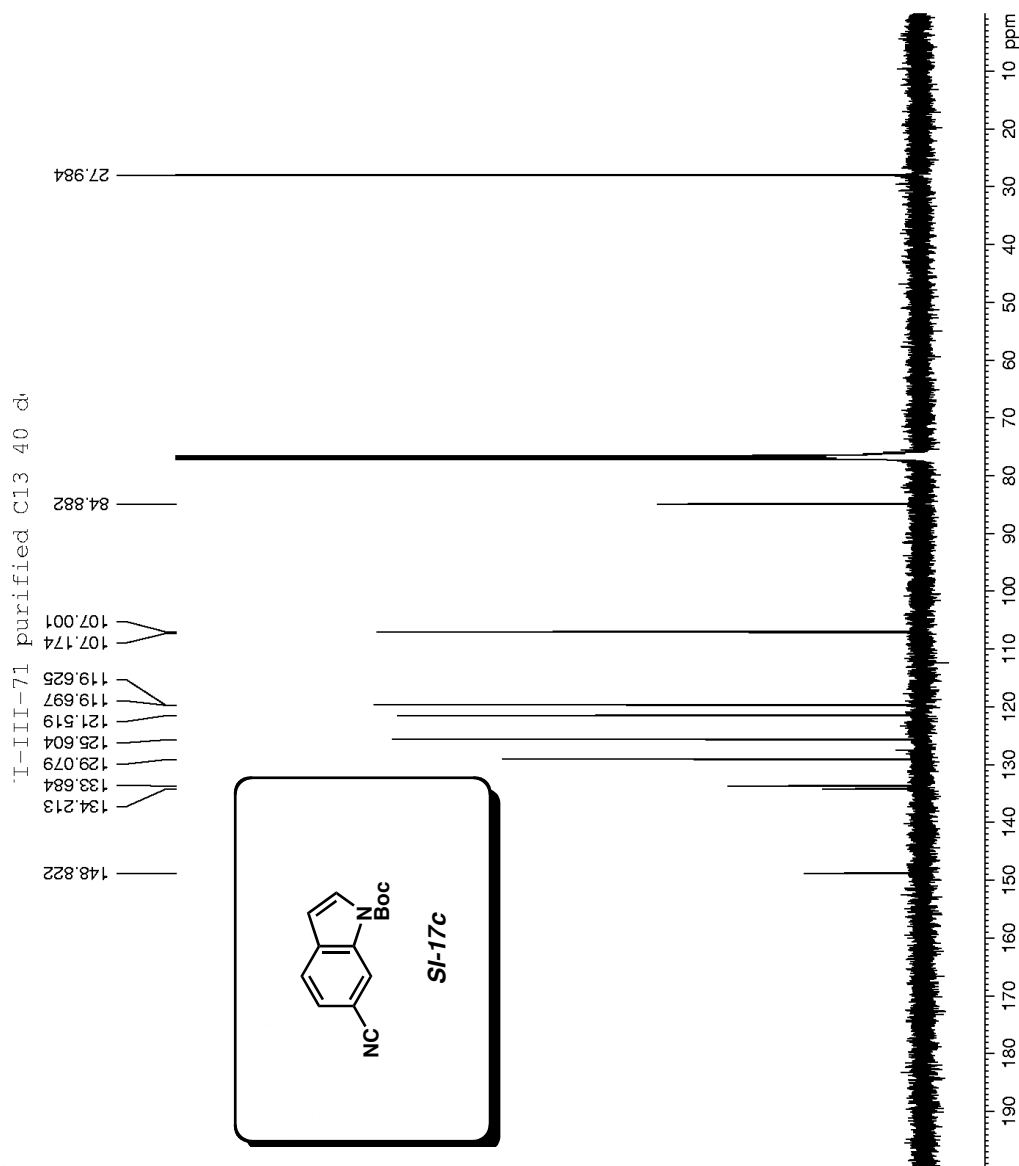

Current Data Parameters  
 NAME GJI-II-196  
 EXPNO 21  
 PROCNO 1

F2 - Acquisition Parameters  
 Date\_ 20100514  
 Time 21.32  
 INSTRUM advance500  
 PROBHD 5 mm bb-Z Z800  
 PULPROG zgpg30  
 TD 68536  
 SOLVENT CDCl3  
 NS 1024  
 DS 0  
 SWH 32679.738 Hz  
 FIDRES 0.498653 Hz  
 AQ 1.0027661 sec  
 RG 3251  
 DW 15.300 usec  
 DE 6.00 usec  
 TE 299.1 K  
 D1 2.0000000 sec  
 d11 0.03000000 sec  
 MCREST 0.00000000 sec  
 MCWRK 0.01500000 sec

==== CHANNEL f1 =====  
 NUC1 13C  
 P1 6.20 usec  
 PL1 0.00 dB  
 SFO1 125.8231939 MHz

==== CHANNEL f2 =====  
 CPDPRG2 waltz16  
 NUC2 1H  
 PCPD2 100.00 usec  
 PL2 120.00 dB  
 PL12 16.10 dB  
 SFO2 500.3320013 MHz

F2 - Processing parameters  
 SI 65536  
 SF 125.8080969 MHz  
 WDW EM  
 SSB 0  
 LB 1.00 Hz  
 GB 0  
 PC 1.40

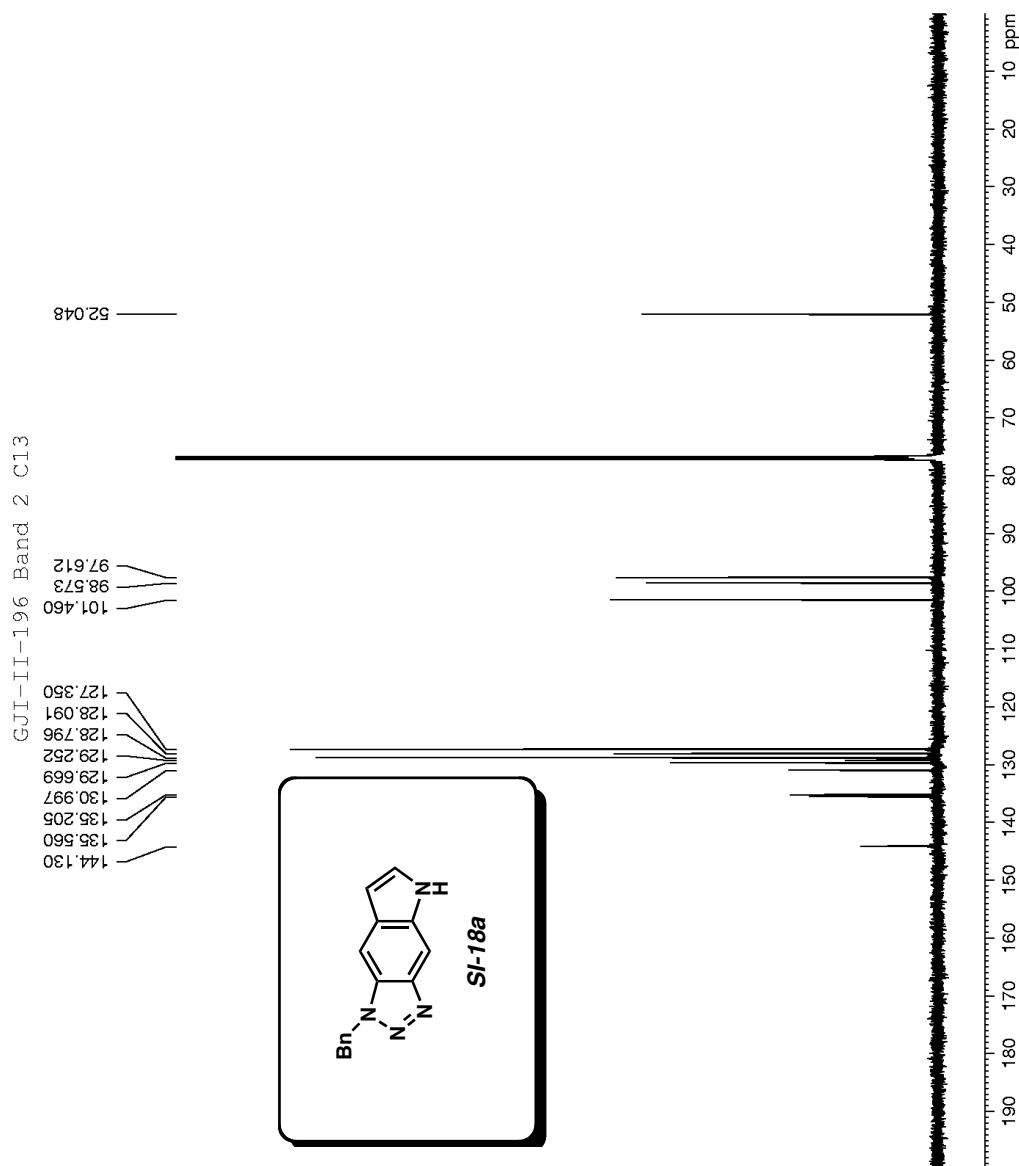

```

Current Data Parameters
NAME      GJI-II-196
EXPNO    34
PROCNO   1

F2 - Acquisition Parameters
Date_    20100517
Time     2.25
INSTRUM  avance500
PROBHD   5 mm bb-Z Z800
PULPROG  zgpg30
TD       68536
SOLVENT  CDCl3
NS       4096
DS       0
SWH      32679.738 Hz
FIDRES   0.498653 Hz
AQ       1.0027661 sec
RG       4096
DW       15.300 usec
DE       6.00 usec
TE       298.8 K
D1       2.0000000 sec
d11      0.03000000 sec
MCREST   0.00000000 sec
MCWRK    0.01500000 sec

===== CHANNEL f1 =====
NUC1     13C
P1       6.20 usec
PL1      0.00 dB
SFO1    125.8231939 MHz

===== CHANNEL f2 =====
CPDPRG2  waltz16
NUC2     1H
PCPD2    100.00 usec
PL2      120.00 dB
PL12     16.10 dB
SFO2    500.3320013 MHz

F2 - Processing parameters
SI       65536
SF       125.8080969 MHz
WDW      EM
SSB      0
LB       3.00 Hz
GB       0
PC       1.40
    
```

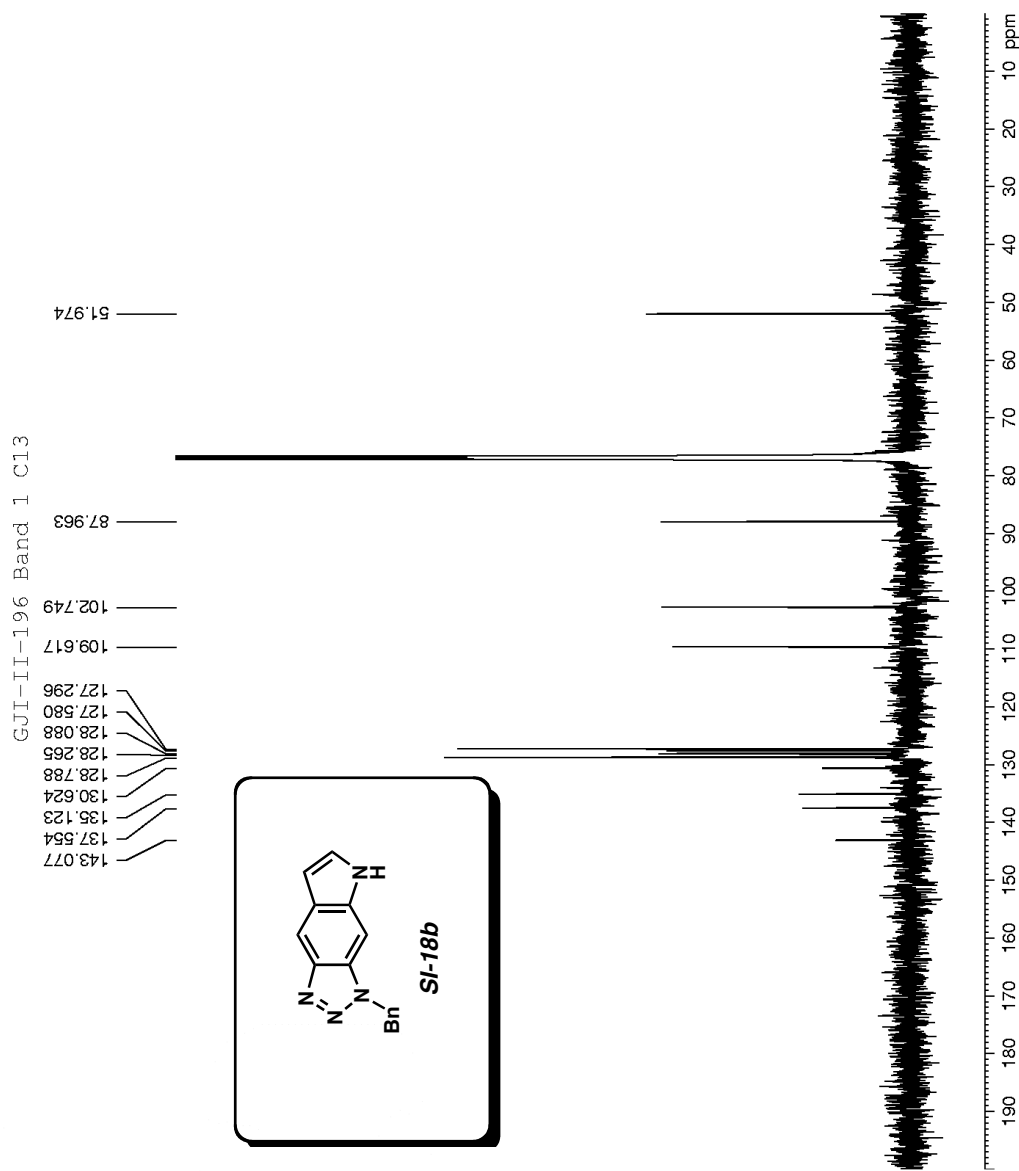

Current Data Parameters  
 NAME GJL-11-179188  
 EXPNO 11  
 PROCNO 1

F2 - Acquisition Parameters  
 Date\_ 20100521  
 Time 21:45  
 INSTRUM avance500  
 PROBHD 5 mm bb-Z Z800  
 PULPROG zgpg30  
 TD 66536  
 SOLVENT CDCl3  
 NS 6496  
 DS 0  
 SWH 32679.738 Hz  
 FIDRES 0.498653 Hz  
 AQ 1.0027661 sec  
 RG 4096  
 DW 15.300 usec  
 DE 6.00 usec  
 TE 298.6 K  
 D1 2.0000000 sec  
 d11 0.0300000 sec  
 MCREST 0.0000000 sec  
 MCWRK 0.01500000 sec

==== CHANNEL f1 =====  
 NUC1 <sup>13</sup>C  
 P1 6.20 usec  
 PL1 0.00 dB  
 SFO1 125.8231939 MHz

==== CHANNEL f2 =====  
 CPDPRG2 waltz16  
 NUC2 <sup>1</sup>H  
 PCPD2 100.00 usec  
 PL2 0.00 dB  
 PL12 16.10 dB  
 SFO2 500.3320013 MHz

F2 - Processing parameters  
 SI 65536  
 SF 125.8080969 MHz  
 WDW EM  
 SSB 0  
 LB 1.00 Hz  
 GB 0  
 PC 1.40

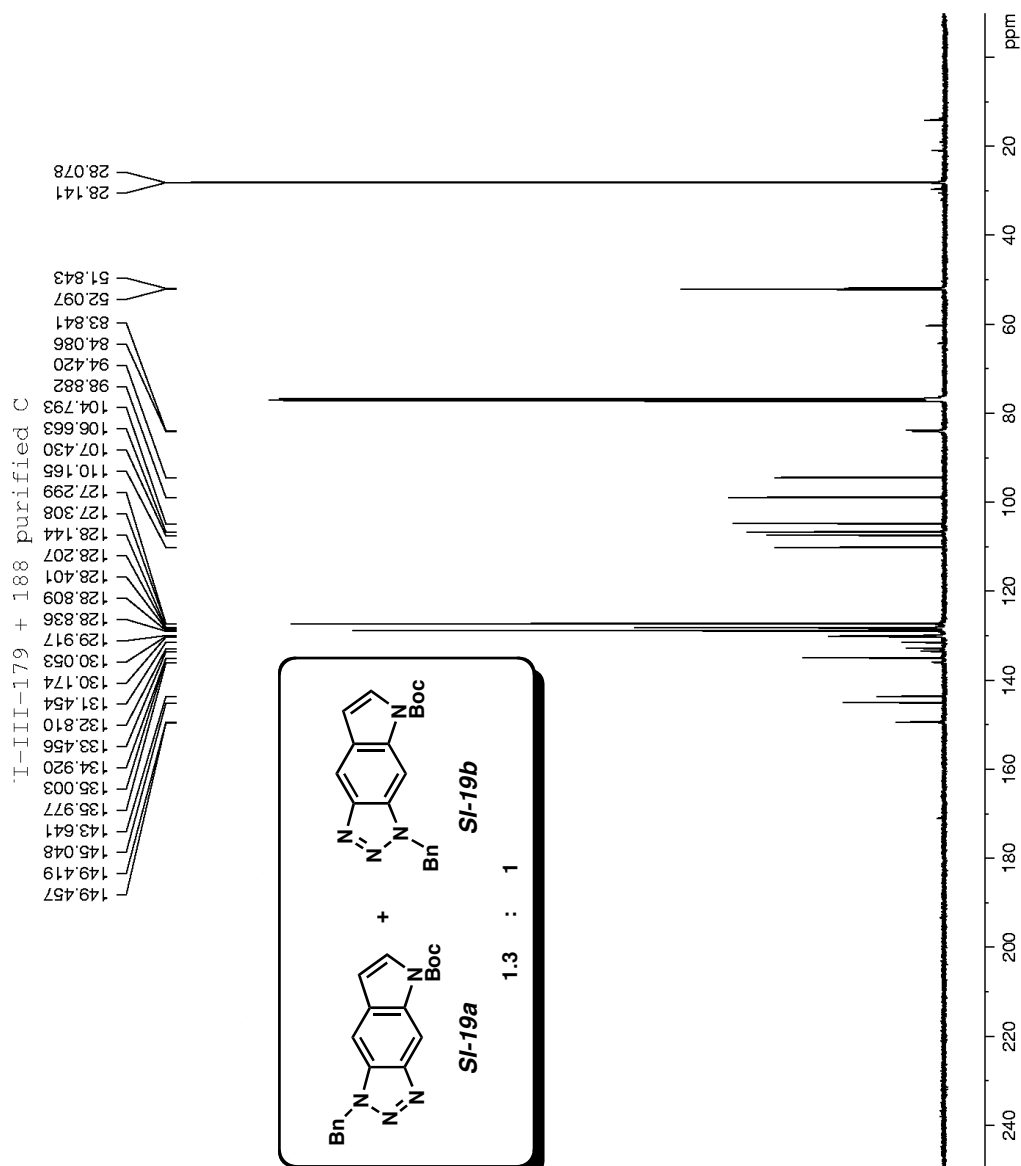

Current Data Parameters  
 NAME GJI-III-108pTLC  
 EXPNO 41  
 PROCNO 1

F2 - Acquisition Parameters  
 Date\_ 20100404  
 Time 19.12  
 INSTRUM avance500  
 PROBHD 5 mm bb-Z Z800  
 PULPROG zgpg30  
 TD 68536  
 SOLVENT CDCl3  
 NS 1024  
 DS 0  
 SWH 32679.738 Hz  
 FIDRES 0.498653 Hz  
 AQ 1.0027661 sec  
 RG 4096  
 DW 15.300 usec  
 DE 6.00 usec  
 TE 298.1 K  
 D1 2.00000000 sec  
 d11 0.03000000 sec  
 MCREST 0.00000000 sec  
 MCWRK 0.01500000 sec

==== CHANNEL f1 =====  
 NUC1 13C  
 P1 6.20 usec  
 PL1 0.00 dB  
 SFO1 125.8231939 MHz

==== CHANNEL f2 =====  
 CPDPRG2 waltz16  
 NUC2 1H  
 PCPD2 100.00 usec  
 PL2 120.00 dB  
 PL12 16.10 dB  
 SFO2 500.3320013 MHz

F2 - Processing parameters  
 SI 65536  
 SF 125.8080969 MHz  
 WDW EM  
 SSB 0  
 LB 3.00 Hz  
 GB 0  
 PC 1.40

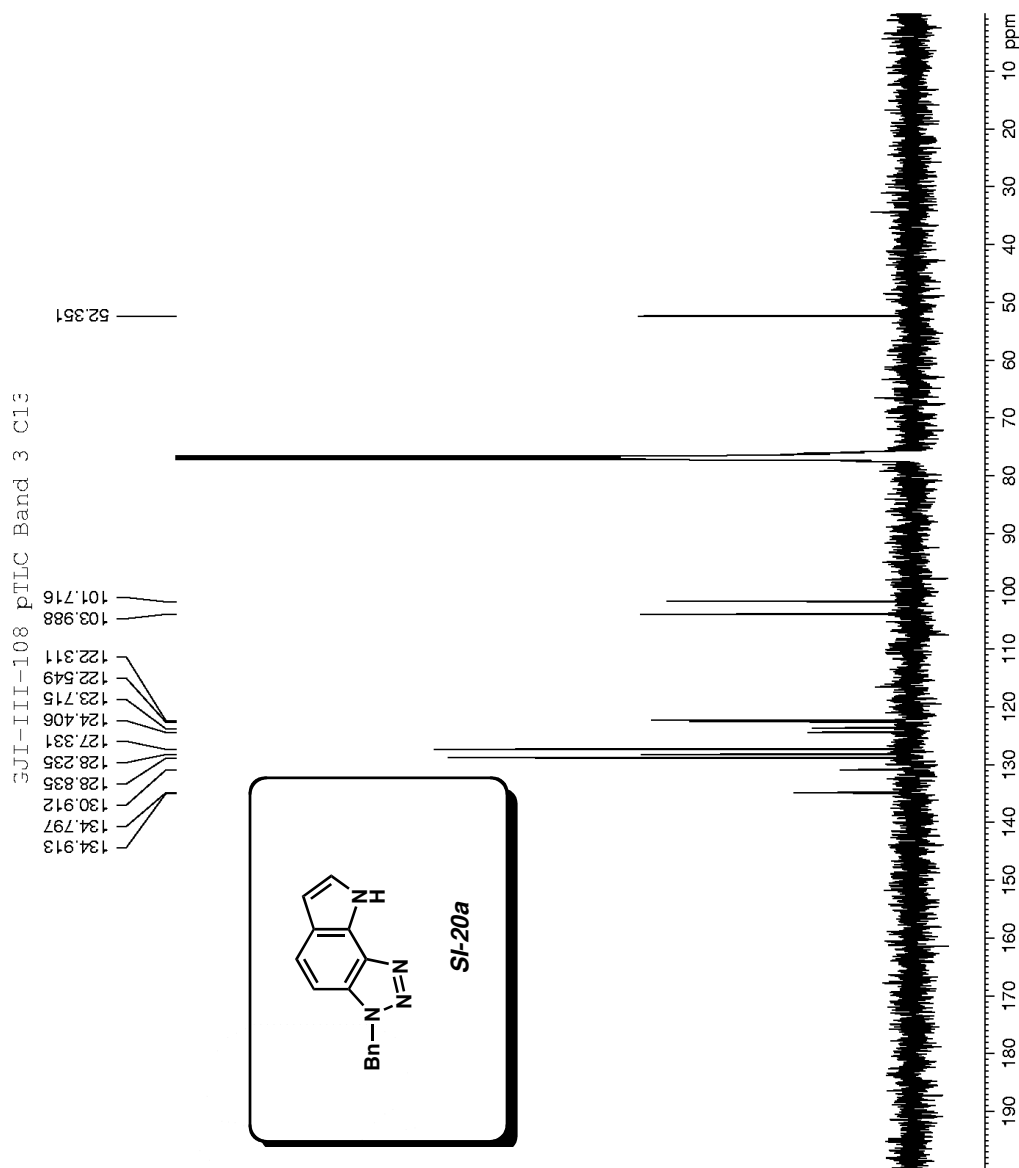

Current Data Parameters  
 NAME GJI-III-108  
 EXPNO 72  
 PROCNO 1

F2 - Acquisition Parameters  
 Date\_ 20100408  
 Time 12.03  
 INSTRUM avance500  
 PROBHD 5 mm bb-Z Z800  
 PULPROG zgpg30  
 TD 68536  
 SOLVENT CDCl3  
 NS 8192  
 DS 0  
 SWH 32679.738 Hz  
 FIDRES 0.498653 Hz  
 AQ 1.0027661 sec  
 RG 6502  
 DW 15.300 usec  
 DE 6.00 usec  
 TE 299.1 K  
 D1 2.0000000 sec  
 d11 0.03000000 sec  
 MCREST 0.00000000 sec  
 MCWRK 0.01500000 sec

==== CHANNEL f1 =====  
 NUC1 <sup>13</sup>C  
 P1 6.20 usec  
 PL1 0.00 dB  
 SFO1 125.8231939 MHz

==== CHANNEL f2 =====  
 CPDPRG2 waltz16  
 NUC2 <sup>1</sup>H  
 PCPD2 100.00 usec  
 PL2 120.00 dB  
 PL12 16.10 dB  
 SFO2 500.3320013 MHz

F2 - Processing parameters  
 SI 65536  
 SF 125.8080969 MHz  
 WDW EM  
 SSB 0  
 LB 1.00 Hz  
 GB 0  
 PC 1.40

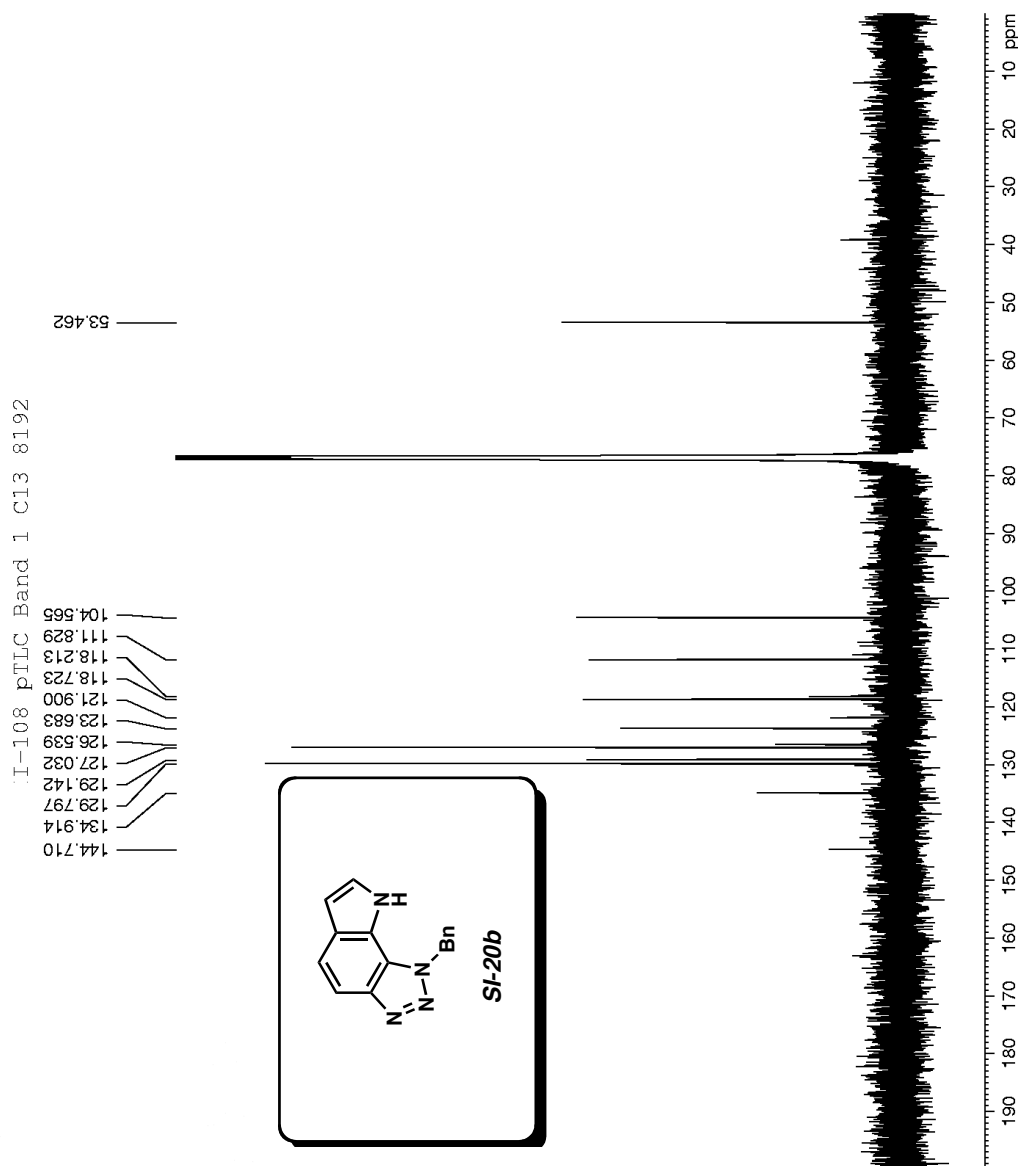

Current Data Parameters  
 NAME GJI-III-90  
 EXPNO 11  
 PROCNO 1

F2 - Acquisition Parameters  
 Date\_ 20100105  
 Time 2.59  
 INSTRUM avance500  
 PROBHD 5 mm bb-Z Z800  
 PULPROG zgpg30  
 TD 68536  
 SOLVENT CDCl3  
 NS 512  
 DS 0  
 SWH 32679.738 Hz  
 FIDRES 0.498653 Hz  
 AQ 1.0027661 sec  
 RG 4096  
 DW 15.300 usec  
 DE 6.00 usec  
 TE 296.9 K  
 D1 2.0000000 sec  
 d11 0.03000000 sec  
 MCREST 0.00000000 sec  
 MCWRK 0.01500000 sec

==== CHANNEL f1 =====  
 NUC1 <sup>13</sup>C  
 P1 6.20 usec  
 PL1 0.00 dB  
 SFO1 125.8231939 MHz

==== CHANNEL f2 =====  
 CPDPRG2 waltz16  
 NUC2 <sup>1</sup>H  
 PCPD2 100.00 usec  
 PL2 120.00 dB  
 PL12 16.10 dB  
 SFO2 500.3320013 MHz

F2 - Processing parameters  
 SI 65536  
 SF 125.8080969 MHz  
 WDW EM  
 SSB 0  
 LB 1.00 Hz  
 GB 0  
 PC 1.40

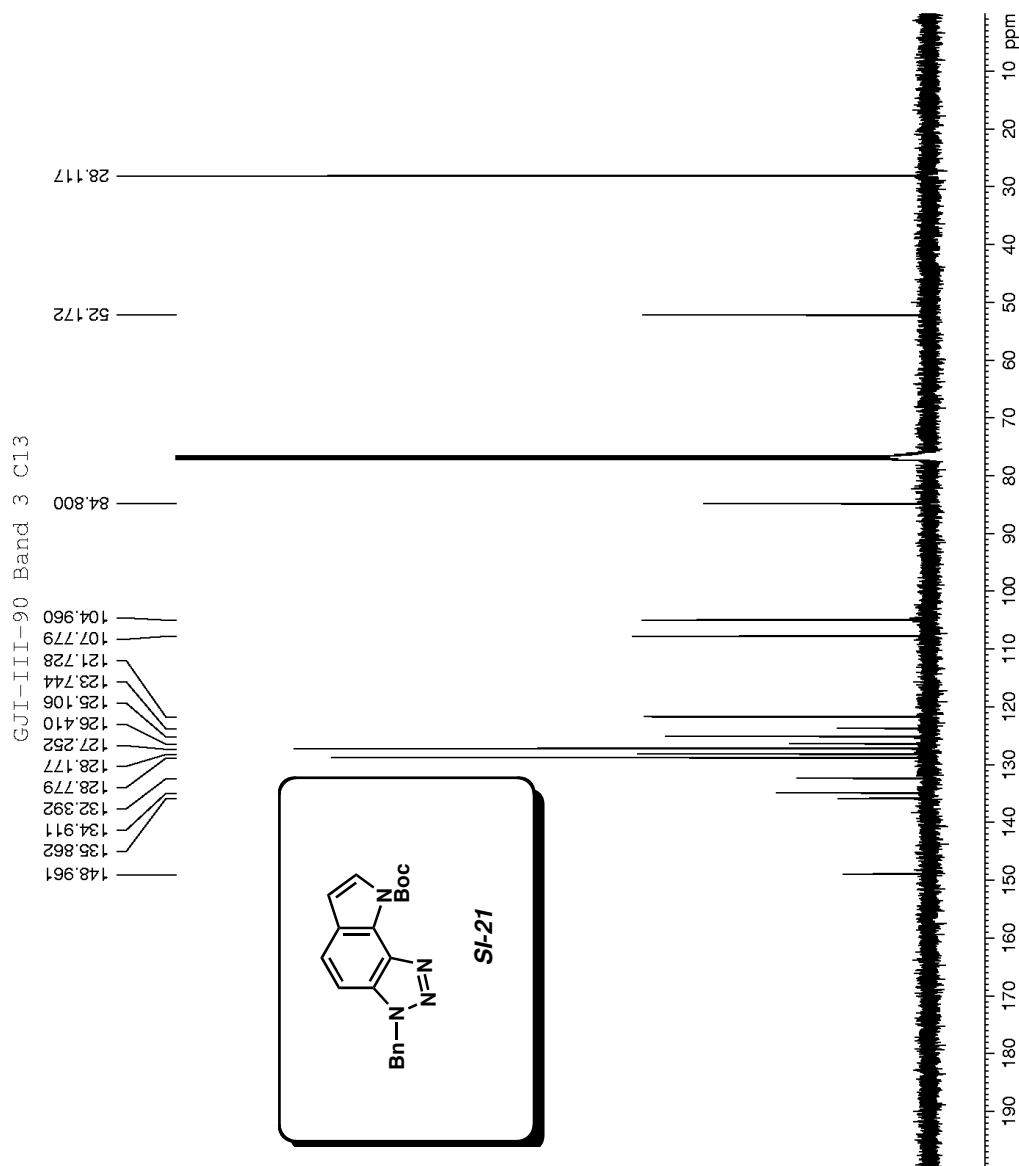





## References:

- <sup>1</sup> Bronner, S. M.; Bahnck, K. B.; Garg, N. K. *Org. Lett.* **2009**, *11*, 1007–1010.
- <sup>2</sup> Buchgraber, P.; Domostoj, M. M.; Scheiper, B.; Wirtz, C.; Mynott, R.; Rust, J.; Fürstner, A. *Tetrahedron* **2009**, *65*, 6519–6534.
- <sup>3</sup> Cheong, P. H.-Y.; Paton, R. S.; Bronner, S. M.; Im, G.-Y. J.; Garg, N. K.; Houk, K. N. *J. Am. Chem. Soc.* **2010**, *132*, 1267–1269.
- <sup>4</sup> a) Stadlwieser, J. F.; Dambaur, M. E. *Helv. Chim. Acta* **2006**, *89*, 936–946. b) Gwaltney, S. L.; Imade, H. M.; Barr, K. J.; Li, Q.; Gehrke, L.; Credo, R. B.; Warner, R. B.; Lee, J. Y.; Kovar, P.; Wang, J.; Nukkala, M. A.; *Bioorg. Med. Chem. Lett.* **2001**, *11*, 871–874.
- <sup>5</sup> Gwaltney, S. L.; Imade, H. M.; Barr, K. J.; Li, Q.; Gehrke, L.; Credo, R. B.; Warner, R. B.; Lee, J. Y.; Kovar, P.; Wang, J.; Nukkala, M. A. *Bioorg. Med. Chem. Lett.* **2001**, *11*, 871–874.
- <sup>6</sup> Kauch, M.; Hoppe, D. *Can. J. Chem.* **2001**, *79*, 1736–1746.
- <sup>7</sup> Kauch, M.; Snieckus, V.; Hoppe, D. *J. Org. Chem.* **2005**, *70*, 7149–7158.
- <sup>8</sup> This is an improved procedure from what our group previously reported. See ref. 3.
- <sup>9</sup> On larger scales, cooling to  $-78\text{ }^{\circ}\text{C}$  can cause the carbamate to crash out of the ethereal solution, in which case, small portions of THF should be added to re-solubilize the material prior to the introduction of *n*-BuLi.
- <sup>10</sup> The exothermic additions of *n*-BuLi and TMSCl should be executed at such a rate to maintain an internal reaction temperature below  $-70\text{ }^{\circ}\text{C}$  to avoid C2 lithiation.
- <sup>11</sup> Igarashi, Y.; Yanagisawa, E.; Ohshima, T.; Takeda, S.; Aburada, M.; Miyamoto, K. *Chem. Pharm. Bull.* **2007**, *55*, 328–333.
- <sup>12</sup> Jiang, J.; Gribble, G. W. *Tetrahedron Lett.* **2002**, *43*, 4115–4117.
- <sup>13</sup> Alvarez, S. G.; Alvarez, M. T. *Synthesis* **1997**, 413–414.
