# Supplementary material
Source: PubMed Central journal article supplement (PMC3075889)
Supplement: NIHMS255340-supplement-2_si_002.pdf [file NIHMS255340-supplement-2_si_002.pdf]

# Indolyne Experimental and Computational Studies: Synthetic Applications and Origins of Selectivities of Nucleophilic Additions

*G-Yoon J. Im, Sarah M. Bronner, Adam E. Goetz, Robert S. Paton,*

*Paul H.-Y. Cheong, K. N. Houk,\* and Neil K. Garg\**

Department of Chemistry and Biochemistry, University of California, Los Angeles, California 90095

\* houk@chem.ucla.edu; neilgarg@chem.ucla.edu

## SUPPORTING INFORMATION

|                                                                                                            |       |
|------------------------------------------------------------------------------------------------------------|-------|
| <b>Full Reference 35</b>                                                                                   | p. S1 |
| <b>Figure S1. Coordinate scan for nucleophilic addition of cyanide to 4,5-, 5,6- and 6,7-indolynes.</b>    | p. S2 |
| <b>Figure S2. Coordinate scan for aniline attack of 6,7-indolyne at the 6-position</b>                     | p. S3 |
| <b>Figure S3. Comparison of different levels of theory for activation barriers and distortion energies</b> | p. S4 |
| Cartesian Coordinates                                                                                      | p. S4 |

### Full reference 35:

Gaussian 09, Revision A.02, M. J. Frisch, G. W. Trucks, H. B. Schlegel, G. E. Scuseria, M. A. Robb, J. R. Cheeseman, G. Scalmani, V. Barone, B. Mennucci, G. A. Petersson, H. Nakatsuji, M. Caricato, X. Li, H. P. Hratchian, A. F. Izmaylov, J. Bloino, G. Zheng, J. L. Sonnenberg, M. Hada, M. Ehara, K. Toyota, R. Fukuda, J. Hasegawa, M. Ishida, T. Nakajima, Y. Honda, O. Kitao, H. Nakai, T. Vreven, J. A. Montgomery, Jr., J. E. Peralta, F. Ogliaro, M. Bearpark, J. J. Heyd, E. Brothers, K. N. Kudin, V. N. Staroverov, R. Kobayashi, J. Normand, K. Raghavachari, A. Rendell, J. C. Burant, S. S. Iyengar, J. Tomasi, M. Cossi, N. Rega, J. M. Millam, M. Klene, J. E. Knox, J. B. Cross, V. Bakken, C. Adamo, J. Jaramillo, R. Gomperts, R. E. Stratmann, O. Yazyev, A. J. Austin, R. Cammi, C. Pomelli, J. W. Ochterski, R. L. Martin, K. Morokuma, V. G. Zakrzewski, G. A. Voth, P. Salvador, J. J. Dannenberg, S.

**Figure S1. B3LYP/6-31G(d) energy scan along the N---C coordinate for cyanide attack of 4,5-indolyne, 5,6-indolyne and 6,7-indolyne**

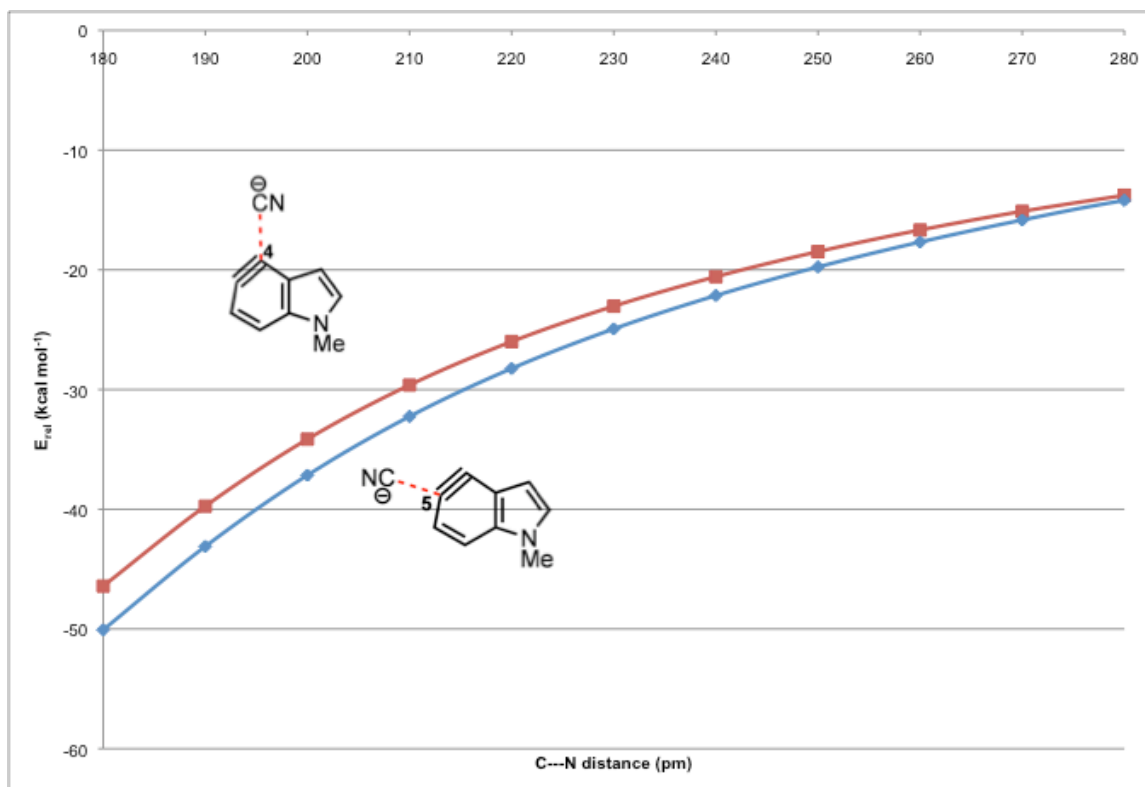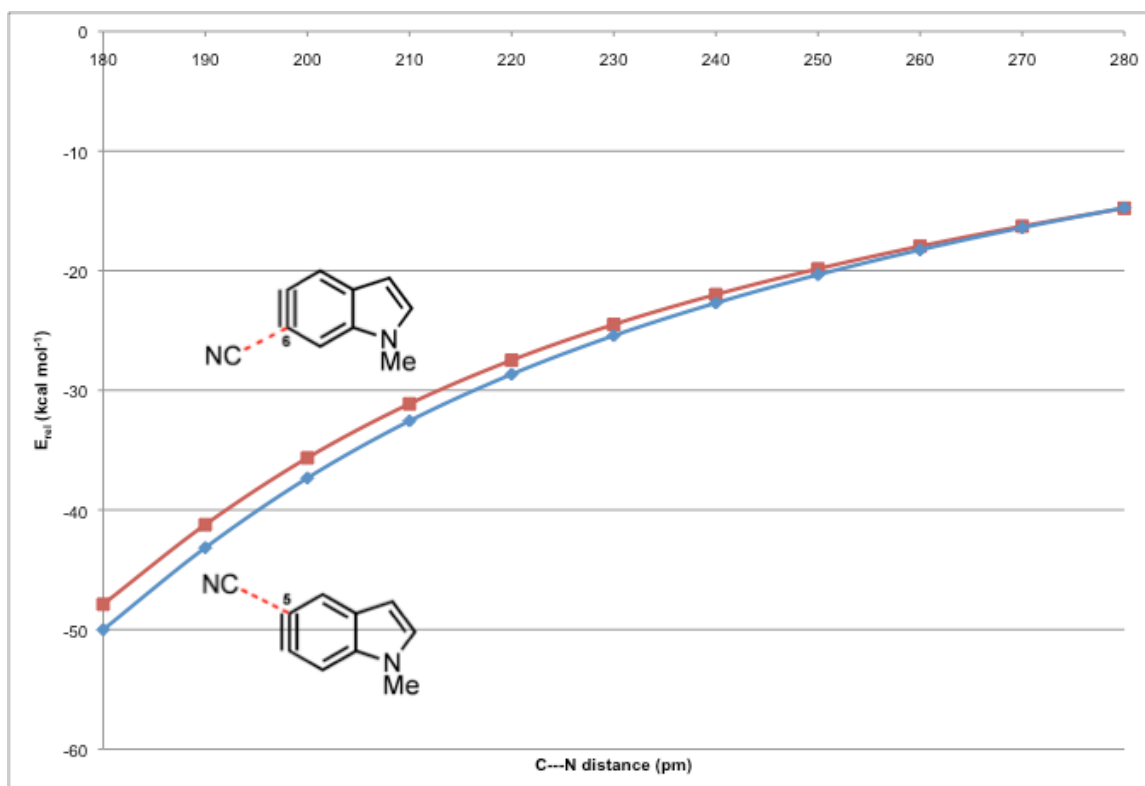

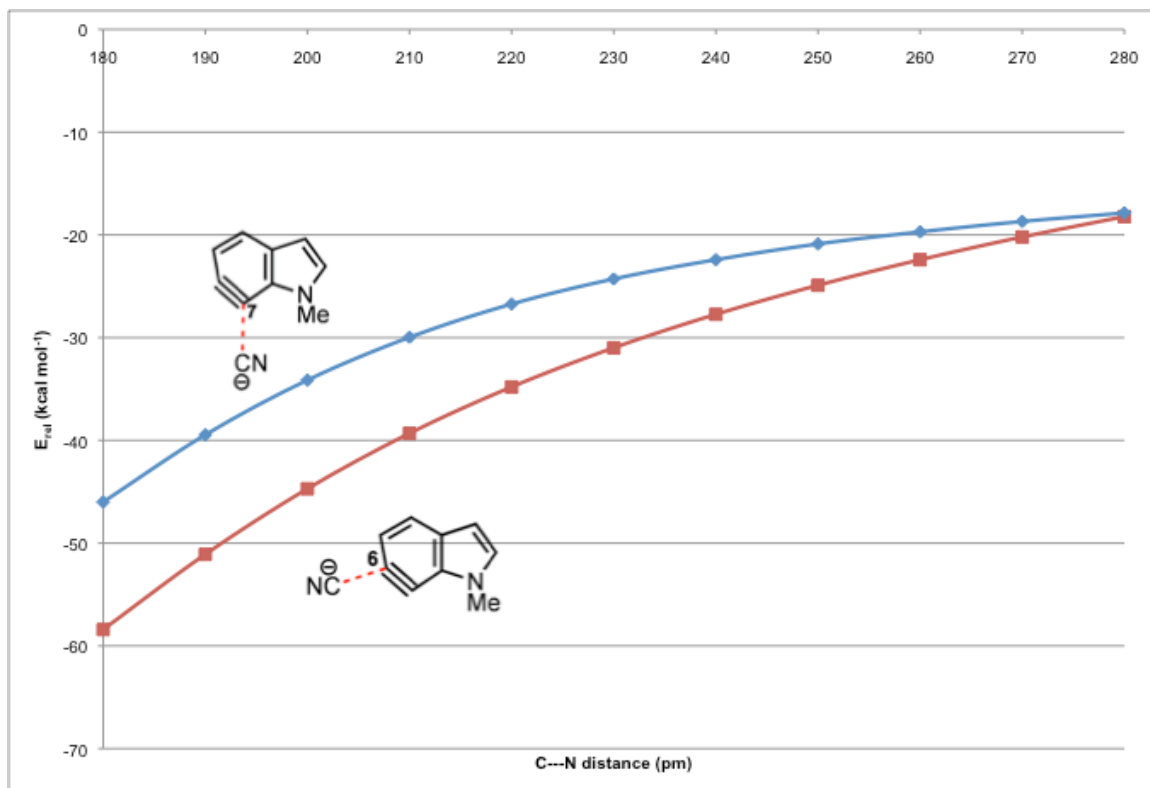

**Figure S2.** B3LYP/6-31G(d) energy scan along the N---C coordinate for aniline attack of 6,7-indolyne

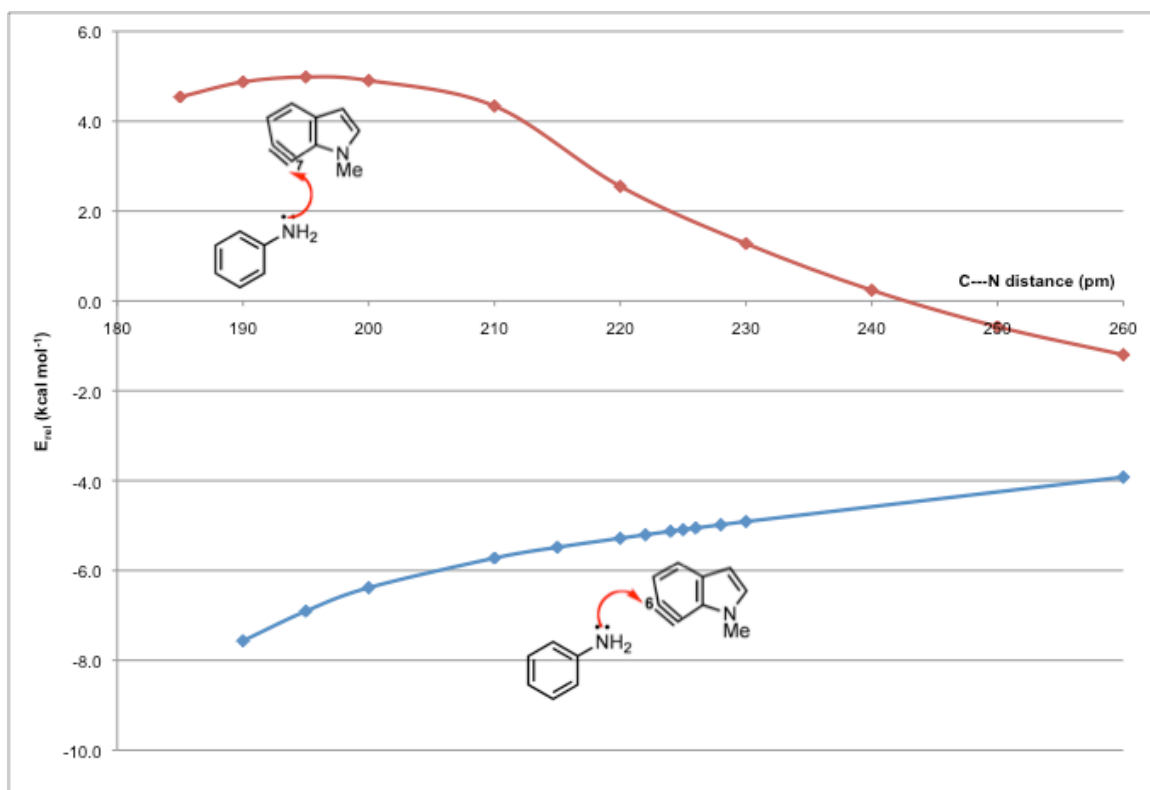

**Figure S3. Comparison of B3LYP/6-31G(d) computed activation barriers and distortion energies with MP2, B2PLYP and M06-2X and with larger basis sets.**

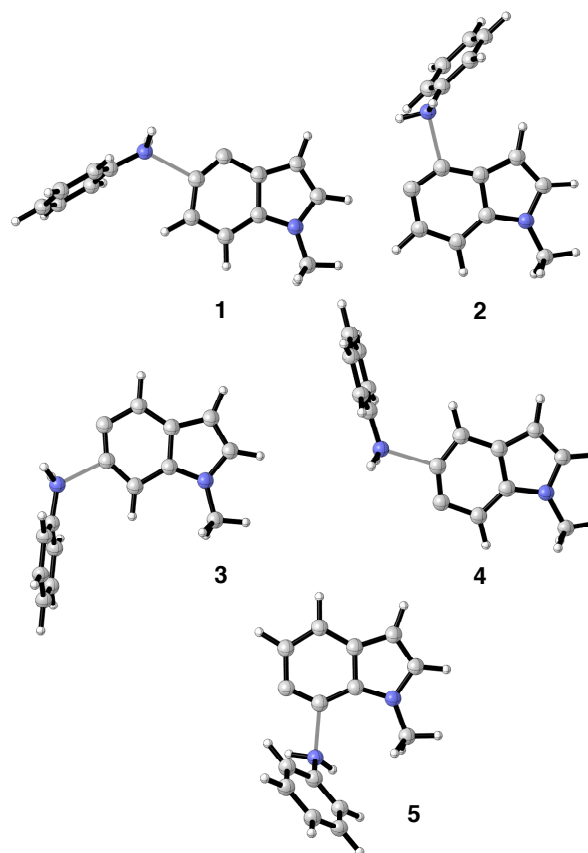

|   |                  | 6-31G(d) |      |        | 6-311+G(d,p) |       |
|---|------------------|----------|------|--------|--------------|-------|
|   |                  | B3LYP    | MP2  | B2PLYP | M06-2X       | B3LYP |
| 1 | $\Delta\Delta E$ | 2.7      | 3.0  | 2.3    | 1.9          | 2.7   |
|   | $\Delta E_d$     | 3.5      | 3.9  | 4.0    | 4.4          | 3.9   |
| 2 | $\Delta E_i$     | 5.8      | 4.6  | 5.3    | 8.0          | 4.4   |
|   | $\Delta E_d$     | 4.9      | 6.7  | 6.0    | 6.1          | 5.6   |
| 3 | $\Delta E_i$     | 5.2      | 4.4  | 5.0    | 7.8          | 3.4   |
|   | $\Delta\Delta E$ | 1.7      | 1.3  | 1.5    | 0.7          | 1.6   |
| 4 | $\Delta E_d$     | 5.8      | 7.8  | 7.0    | 7.1          | 6.5   |
|   | $\Delta E_i$     | 6.6      | 6.4  | 6.7    | 10.2         | 5.6   |
| 5 | $\Delta E_d$     | 3.4      | 4.5  | 4.1    | 4.4          | 3.9   |
|   | $\Delta E_i$     | 5.9      | 4.3  | 5.3    | 8.2          | 4.6   |
| 5 | $\Delta E_d$     | 8.8      | 12.8 | 10.7   | 10.4         | 9.4   |
|   | $\Delta E_i$     | 3.8      | 4.3  | 4.2    | 7.7          | 0.9   |

The B3LYP/6-31G(d) transition structures for aniline addition to 4,5-, 5,6-, and 6,7-indolyne were used to investigate the effects of level of theory and basis set size on the relative energies and distortion energies of the regioisomeric pathways. Single point energy calculations were used to compute relative energies and distortion energies. Reassuringly, the regiochemical preference computed at each level of theory and basis set size is the same, and the computed distortion energies are always in accord – i.e. the favored transition structure has a lower distortion energy than the disfavored structure for all methods. The unfavored TS for 6,7-indolyne has the highest distortion energy of all regioisomeric pathways at all levels. We can be confident about the computations, and these results demonstrate the predictive power of the distortion model for explaining the observed regioselectivity.

**B3LYP/6-31G(d) cartesian coordinates, electronic energies, enthalpies and free energies at 298 K.**

29:

|   |           |           |           |   |           |           |           |
|---|-----------|-----------|-----------|---|-----------|-----------|-----------|
| C | 0.015323  | -0.275344 | -0.000006 | C | -2.295377 | -1.071152 | 0.000247  |
| C | -0.35041  | 1.122809  | 0.000058  | C | -0.915782 | -1.336535 | 0.00009   |
| C | -1.739268 | 1.250927  | 0.000252  | C | 1.885554  | 0.971536  | -0.00059  |
| C | -2.547665 | 0.301692  | 0.000313  | C | 0.856562  | 1.881399  | 0.000049  |
|   |           |           |           | H | 2.954264  | 1.139411  | -0.000943 |
|   |           |           |           | H | 0.956913  | 2.957192  | 0.000201  |
|   |           |           |           | N | 1.39782   | -0.321235 | -0.000155 |
|   |           |           |           | C | 2.200655  | -1.527823 | -0.000112 |
|   |           |           |           | H | 1.997626  | -2.133443 | 0.890803  |

H 1.997245 -2.133715 -0.890753  
H 3.257322 -1.251701 -0.000383  
H -0.572692 -2.367875 0.000038  
H -3.032969 -1.866275 0.000323

E(B3LYP/6-31G(d)): -401.790665387  
H(B3LYP/6-31G(d)): -401.648655  
G(B3LYP/6-31G(d)): -401.690256

### 29 - aniline TS (5 attack):

C -2.473848 -1.051074 -0.006821  
C -2.625681 0.377607 -0.007621  
C -1.533706 1.267591 -0.057754  
C -0.24017 0.732028 -0.108111  
C -0.263451 -0.654518 -0.100586  
C -1.156848 -1.575752 -0.058034  
C -4.67106 -0.543946 0.083672  
H -1.677988 2.344579 -0.057586  
H 0.647508 1.354406 -0.14712  
H -5.752372 -0.533399 0.129473  
C 2.875976 -0.662588 -0.071876  
C 3.406927 -0.36891 1.191888  
C 3.468525 -0.111939 -1.216836  
C 4.524546 0.455658 1.302392  
H 2.941749 -0.786413 2.081604  
C 4.585778 0.712058 -1.094652  
H 3.052466 -0.331253 -2.19736  
C 5.120937 1.000104 0.162693  
H 4.931265 0.672011 2.286519  
H 5.040564 1.128691 -1.989279  
N 1.700116 -1.441996 -0.184508  
H 5.992802 1.641125 0.253464  
H 1.545188 -2.100087 0.572751  
H 1.590264 -1.921475 -1.072523  
C -3.797757 -1.600376 0.05192  
H -4.063822 -2.648299 0.069093  
N -3.978631 0.65621 0.049021  
C -4.569762 1.976125 0.06466  
H -4.217121 2.556518 0.926331  
H -4.327296 2.531451 -0.85025  
H -5.65603 1.88024 0.133691

E(B3LYP/6-31G(d)): -689.396053571  
H(B3LYP/6-31G(d)): -689.128298  
G(B3LYP/6-31G(d)): -689.188532

### 29 - aniline TS (4 attack):

C 1.10676 -0.036412 -0.294709  
C 2.487975 0.009643 0.09025  
C 3.170117 1.214933 0.347471  
C 2.479503 2.423016 0.226312  
C 1.107647 2.423935 -0.155657  
C 0.603514 1.254804 -0.364589  
C 1.892987 -2.13973 -0.196614  
H 4.218755 1.203411 0.637585  
H 3.015921 3.350167 0.430653  
H 2.047801 -3.210417 -0.210276  
C -2.368852 0.585934 -0.407245  
C -2.903531 -0.502196 -1.10673  
C -2.813262 0.867326 0.890785  
C -3.880215 -1.300052 -0.511056  
H -2.558677 -0.719521 -2.115388  
C -3.792505 0.067109 1.474634  
H -2.38254 1.702356 1.436724  
C -4.330956 -1.019045 0.779682  
H -4.293196 -2.139777 -1.063295  
H -4.134822 0.293438 2.480669  
N -1.323639 1.367651 -0.976243  
H -5.09449 -1.639165 1.239955  
H -1.261725 1.285167 -1.988381  
H -1.33863 2.352883 -0.720761  
C 0.759364 -1.413676 -0.468805  
H -0.204462 -1.818531 -0.740802  
N 2.936944 -1.300284 0.138892  
C 4.280581 -1.711096 0.486686  
H 5.014477 -1.28836 -0.210023  
H 4.540161 -1.389369 1.502442  
H 4.343521 -2.800816 0.43986

E(B3LYP/6-31G(d)): -689.392871797  
H(B3LYP/6-31G(d)): -689.124766  
G(B3LYP/6-31G(d)): -689.184187

### 29 - p-cresol TS (5 attack):

C -2.440508 -0.957585 -0.188849  
C -2.846822 0.399553 0.039055  
C -2.016946 1.503903 -0.22977  
C -0.74463 1.247604 -0.742779  
C -0.48037 -0.108322 -0.909174  
C -1.147638 -1.252879 -0.702464  
C -4.547142 -0.938344 0.636108  
H -2.344998 2.524194 -0.053853  
H -0.048134 2.044295 -0.982518  
H -5.537959 -1.160859 1.010696  
H 0.608227 -1.51058 -1.476804

O 0.965491 -0.552447 -1.546369  
C 2.139263 -0.34238 -0.764963  
C 2.289773 -0.968696 0.469243  
C 3.100657 0.510913 -1.28245  
C 3.45574 -0.729472 1.191477  
H 1.503895 -1.612943 0.849931  
C 4.258272 0.743652 -0.535318  
H 2.946559 0.974802 -2.251325  
C 4.456208 0.128669 0.70595  
H 3.588784 -1.215291 2.155102  
H 5.020031 1.410476 -0.930902  
C 5.710493 0.376399 1.511187  
H 5.476533 0.820407 2.486518  
H 6.251422 -0.557938 1.704532  
H 6.392452 1.055353 0.990468  
C -4.911256 1.544204 0.911525  
H -4.432722 2.100503 1.72769  
H -5.039378 2.221915 0.05832  
H -5.899722 1.220815 1.246485  
N -4.134089 0.382333 0.541036  
C -3.553448 -1.776505 0.205125  
H -3.600171 -2.856196 0.165945

E(B3LYP/6-31G(d)): -748.561266971  
H(B3LYP/6-31G(d)): -748.278796  
G(B3LYP/6-31G(d)): -748.341154

#### **29 - p-cresol TS (4 attack):**

C 1.458641 -0.141625 -0.455622  
C 2.726677 -0.008667 0.191001  
C 3.223224 1.228356 0.641219  
C 2.448585 2.374198 0.452222  
C 1.166889 2.332418 -0.174537  
C 0.832781 1.094983 -0.547047  
C 2.416136 -2.170657 -0.340741  
H 4.195313 1.28731 1.126409  
H 2.853166 3.3232 0.805674  
H 2.678263 -3.218832 -0.395851  
O -0.630076 1.23018 -1.295024  
C -1.773628 0.661764 -0.659411  
C -2.468176 -0.314127 -1.357353  
C -2.154889 1.075133 0.613391  
C -3.586983 -0.895949 -0.757072  
H -2.138715 -0.605911 -2.349372  
C -3.279383 0.487588 1.18856  
H -1.571411 1.825298 1.137012  
C -4.012943 -0.503556 0.517495  
H -4.137937 -1.664149 -1.293646  
H -3.588589 0.801234 2.182647

C -5.240518 -1.114616 1.152176  
H -5.073926 -1.338031 2.211822  
H -6.098076 -0.4314 1.096939  
H -5.52855 -2.044583 0.652232  
H -0.527163 2.233465 -1.101777  
C 1.287798 -1.524529 -0.782376  
H 0.442514 -1.98344 -1.274354  
N 3.287878 -1.274699 0.245657  
C 4.581876 -1.59072 0.812059  
H 5.382859 -1.057144 0.286378  
H 4.622351 -1.320891 1.874106  
H 4.758848 -2.664646 0.718598

E(B3LYP/6-31G(d)): -748.557567242  
H(B3LYP/6-31G(d)): -748.274945  
G(B3LYP/6-31G(d)): -748.337279

#### **29 - azide TS (4 attack):**

C -1.48524 1.762785 0.151168  
C -1.632109 0.365651 0.017739  
C -0.525247 -0.544518 -0.141667  
C 0.676033 0.156633 -0.135643  
C 0.827605 1.402957 -0.028243  
C -0.206019 2.335856 0.131713  
H -2.359427 2.399061 0.264386  
H -0.071088 3.409139 0.227968  
N 3.50207 1.471625 -0.147506  
C -2.431962 -1.728753 -0.149163  
H -3.203612 -2.486248 -0.183488  
N 3.415456 0.329773 -0.194685  
N 2.932171 -0.799456 -0.374207  
N -2.783775 -0.401781 0.008153  
C -1.068355 -1.861034 -0.243617  
C -4.133757 0.106296 0.142648  
H -4.270648 0.609495 1.107226  
H -4.366096 0.81716 -0.658973  
H -4.836016 -0.728165 0.081962  
C 3.311227 -1.84149 0.592694  
H 2.66811 -2.697465 0.385879  
H 4.35551 -2.146838 0.458081  
H 3.155533 -1.517213 1.628192  
H -0.526772 -2.786357 -0.379291

E(B3LYP/6-31G(d)): -605.884116222  
H(B3LYP/6-31G(d)): -605.685085  
G(B3LYP/6-31G(d)): -605.741045

#### **29 - azide TS (5 attack):**

C 1.038213 -1.64852 -0.169788  
C 1.63733 -0.378125 -0.037095  
C 0.894237 0.855939 -0.004584  
C -0.489719 0.662725 -0.117743  
C -0.967141 -0.500375 -0.225405  
C -0.357636 -1.749836 -0.276481  
H 1.645595 -2.54957 -0.192369  
H -0.855465 -2.707808 -0.385508  
N -3.367035 -0.320924 -0.347351  
C 3.082855 1.327856 0.179007  
H 4.060778 1.780369 0.277504  
N -3.318457 0.9086 -0.17493  
N -2.936496 1.986471 -0.14626  
C -4.12102 -1.094509 0.652281  
H -3.93215 -2.145319 0.430431  
H -3.788394 -0.877298 1.674003  
H -5.197938 -0.907354 0.569906  
N 2.975405 -0.047908 0.078119  
C 1.843291 1.915293 0.132907  
C 4.078691 -0.985641 0.084627  
H 3.991178 -1.690399 0.920298  
H 4.116645 -1.556078 -0.851269  
H 5.015012 -0.433477 0.193017  
H 1.636212 2.974408 0.190587

E(B3LYP/6-31G(d)): -605.884652343  
H(B3LYP/6-31G(d)): -605.685709  
G(B3LYP/6-31G(d)): -605.741602

**69:**

C -0.073079 -0.375868 -0.000013  
C 0.593585 0.905225 -0.000001  
C 2.013905 0.986048 -0.000163  
C 2.544504 -0.284203 -0.000325  
C 1.962687 -1.396499 -0.000334  
C 0.601587 -1.624414 -0.000185  
C -1.639902 1.237959 0.00019  
C -0.441972 1.900267 0.000238  
H 2.550597 1.929344 -0.000143  
H -2.649943 1.627001 0.000279  
H -0.309363 2.973263 0.000351  
N -1.433978 -0.131354 0.000162  
C -2.464416 -1.1481 0.000231  
H -2.391359 -1.783963 -0.890484  
H -2.391163 -1.784052 0.890867  
H -3.442846 -0.662564 0.000364  
H 0.090529 -2.582045 -0.000196

E(B3LYP/6-31G(d)): -401.787786989  
H(B3LYP/6-31G(d)): -401.645904  
G(B3LYP/6-31G(d)): -401.687537

**69 - p-cresol TS (5 attack):**

C -2.324501 -2.104586 -0.336542  
C -3.024918 -0.879953 -0.41291  
C -2.432484 0.319023 0.102431  
C -1.156084 0.327399 0.693176  
C -0.641585 -0.947486 0.666567  
C -1.040111 -2.156416 0.235146  
H -0.6743 1.209341 1.101937  
C 2.003432 -0.641835 0.69149  
C 2.413055 -1.109626 -0.554651  
C 2.660722 0.39258 1.340608  
C 3.524032 -0.518343 -1.150779  
H 1.863086 -1.907651 -1.043277  
C 3.766337 0.977377 0.718804  
H 2.318769 0.721374 2.316727  
C 4.216416 0.533723 -0.530052  
H 3.856477 -0.879218 -2.121074  
H 4.290916 1.786293 1.220901  
H -2.801037 -3.002472 -0.734079  
O 0.874506 -1.20659 1.341522  
H 0.713815 -2.182274 1.08268  
C 5.408253 1.172443 -1.204387  
H 6.127533 0.418266 -1.544104  
H 5.103786 1.748274 -2.087653  
H 5.931671 1.855575 -0.528489  
C -4.313883 -0.495522 -0.926935  
C -4.453769 0.848388 -0.716242  
N -3.32275 1.358134 -0.093386  
H -5.04334 -1.143726 -1.393369  
H -5.274518 1.511859 -0.956376  
C -3.103507 2.733859 0.29079  
H -2.21998 3.1499 -0.21015  
H -3.974478 3.327374 0.003247  
H -2.963629 2.826727 1.375518

E(B3LYP/6-31G(d)): -748.555640507  
H(B3LYP/6-31G(d)): -748.273247  
G(B3LYP/6-31G(d)): -748.335924

**69 - p-cresol TS (6 attack):**

C 2.368213 -1.543247 0.041682  
C 2.901714 -0.240956 0.093243  
C 2.188864 0.92294 -0.346439

C 0.88331 0.764146 -0.860026  
C 0.513517 -0.555931 -0.835847  
C 1.067203 -1.725376 -0.457705  
H 0.279064 1.591137 -1.219279  
C -2.147322 -0.551268 -0.711129  
C -2.436016 -1.094922 0.5378  
C -2.943702 0.425927 -1.289376  
C -3.568642 -0.643174 1.210453  
H -1.776735 -1.839511 0.972592  
C -4.068758 0.871068 -0.591728  
H -2.688282 0.822627 -2.266708  
C -4.402604 0.34371 0.661175  
H -3.805104 -1.061264 2.185887  
H -4.698857 1.63758 -1.035625  
H 2.967223 -2.385767 0.391036  
O -1.000485 -0.970853 -1.435525  
H -0.726441 -1.927386 -1.216854  
C -5.634861 0.807988 1.402016  
H -6.420035 0.041076 1.387925  
H -5.412361 1.021914 2.453642  
H -6.052611 1.715416 0.955152  
C 4.217513 1.56175 0.395253  
H 5.116897 2.08548 0.692566  
N 4.141424 0.18858 0.542842  
C 3.054759 2.049042 -0.140978  
H 2.841474 3.085789 -0.362654  
C 5.177474 -0.669671 1.074699  
H 4.831393 -1.197222 1.971921  
H 5.490687 -1.415676 0.33426  
H 6.043622 -0.059593 1.341892

E(B3LYP/6-31G(d)): -748.559050917  
H(B3LYP/6-31G(d)): -748.276447  
G(B3LYP/6-31G(d)): -748.339254

### 69 - aniline TS (5 attack):

C -2.015574 0.283185 -0.015249  
C -2.96889 -0.786973 0.040192  
C -2.522495 -2.128719 0.034131  
C -1.142546 -2.379707 -0.026923  
C -0.404312 -1.304059 -0.073852  
C -0.626664 0.053071 -0.077875  
C -4.068742 1.190837 0.07119  
H -3.260788 -2.932032 0.077986  
H -4.785363 2.001877 0.096051  
C 2.548465 -0.759451 -0.072053  
C 3.026166 -0.373077 1.186481  
C 3.017783 -0.118014 -1.225039  
C 3.979438 0.638657 1.284135

H 2.650459 -0.863901 2.080827  
C 3.970885 0.893252 -1.11583  
H 2.638127 -0.412768 -2.20038  
C 4.456754 1.275873 0.136342  
H 4.351101 0.928269 2.263086  
H 4.336133 1.381282 -2.015171  
N 1.519649 -1.738394 -0.171313  
H 5.200945 2.062604 0.217081  
H 1.511329 -2.423528 0.580239  
H 1.504123 -2.239345 -1.056061  
H 0.121708 0.838498 -0.120718  
C -4.265494 -0.162449 0.094117  
H -5.223349 -0.662529 0.143974  
N -2.71241 1.478407 0.00517  
C -2.117464 2.794178 -0.034648  
H -1.451626 2.955579 0.822986  
H -1.537235 2.940766 -0.954911  
H -2.9101 3.545519 -0.002703

E(B3LYP/6-31G(d)): -689.390838104  
H(B3LYP/6-31G(d)): -689.122821  
G(B3LYP/6-31G(d)): -689.182616

### 69 - aniline TS (6 attack):

C -1.737116 0.765555 -0.00004  
C -2.75191 -0.251549 0.000005  
C -2.467962 -1.634071 0.000027  
C -1.111724 -1.983892 0.000006  
C -0.286502 -0.985047 -0.000038  
C -0.373319 0.381263 -0.000063  
C -3.759652 1.763005 -0.000016  
H -3.277005 -2.365936 0.000062  
H -4.602904 2.441907 -0.000011  
C 2.816697 -0.715121 -0.000013  
C 3.335268 -0.238452 1.211765  
C 3.335352 -0.238452 -1.211755  
C 4.369106 0.695821 1.205954  
H 2.926332 -0.599618 2.152368  
C 4.369189 0.695822 -1.205874  
H 2.926483 -0.599621 -2.152387  
C 4.892375 1.167671 0.000058  
H 4.767564 1.055058 2.150857  
H 4.767712 1.055059 -2.150749  
N 1.717377 -1.608282 -0.000049  
H 5.698879 1.894871 0.000086  
H 1.641391 -2.192395 0.82707  
H 1.641418 -2.192356 -0.827198  
C -2.4163 2.031005 -0.000053  
H -1.963869 3.013277 -0.000084



N -3.97796 0.39664 0.000021  
C -5.266651 -0.259794 0.000053  
H -5.389322 -0.889961 -0.889441  
H -5.389275 -0.889962 0.889551  
H -6.053331 0.498529 0.000075  
H 0.448903 1.090044 -0.0001

E(B3LYP/6-31G(d)): -689.393611466  
H(B3LYP/6-31G(d)): -689.125756  
G(B3LYP/6-31G(d)): -689.185633

**69 - azide TS (5 attack):**

C -1.580244 -0.307081 0.0008  
C -1.171808 1.067795 -0.140856  
C 0.205201 1.394305 -0.267485  
C 0.956358 0.246682 -0.2213  
C 0.633935 -0.977138 -0.104855  
C -0.679863 -1.399055 0.022856  
C -3.42149 0.986136 0.025073  
H 0.560084 2.413938 -0.383456  
H -4.48423 1.183306 0.083725  
H -1.01324 -2.429091 0.123772  
C -2.372973 1.854851 -0.119969  
N -2.960833 -0.316804 0.099306  
C -3.777198 -1.502073 0.251518  
H -3.65151 -2.180448 -0.601152  
H -3.517758 -2.044424 1.168887  
H -4.827181 -1.20606 0.308284  
N 3.367547 0.389218 -0.345058  
N 3.485322 -0.833138 -0.160032  
N 3.263102 -1.954306 -0.120696  
C 4.008916 1.269721 0.64501  
H 5.101392 1.22341 0.568819  
H 3.68538 2.283248 0.406281  
H 3.702114 1.026007 1.668788  
H -2.446025 2.930459 -0.203347

E(B3LYP/6-31G(d)): -605.88227839  
H(B3LYP/6-31G(d)): -605.683404  
G(B3LYP/6-31G(d)): -605.739477

**69 - azide TS (6 attack):**

C 1.431672 0.254965 -0.053841  
C 1.488429 -1.177574 0.094476  
C 0.296244 -1.948114 0.097722  
C -0.825424 -1.155967 -0.052855  
C -0.836634 0.107638 -0.172536

C 0.225602 0.983245 -0.202356  
C 3.589948 -0.348867 0.136699  
H 0.30972 -3.02979 0.201667  
H 4.657964 -0.178903 0.183412  
H 0.189777 2.062628 -0.317995  
C 2.880248 -1.516415 0.211306  
N 2.731299 0.727255 -0.021303  
C 3.11866 2.115107 -0.149874  
H 2.814993 2.523536 -1.121831  
H 2.665965 2.725141 0.641497  
H 4.205153 2.190454 -0.065892  
N -3.456578 -1.587361 -0.145456  
N -3.535917 -0.445201 -0.198441  
N -3.225497 0.741298 -0.38871  
C -3.732765 1.720249 0.585483  
H -3.506544 1.427475 1.617395  
H -3.22996 2.661697 0.361778  
H -4.813685 1.866294 0.47556  
H 3.297585 -2.50606 0.336446

E(B3LYP/6-31G(d)): -605.881301368  
H(B3LYP/6-31G(d)): -605.68242  
G(B3LYP/6-31G(d)): -605.738617

**71:**

C -0.169112 -0.418218 -0.012586  
C 0.509531 0.851133 0.005258  
C 1.923551 0.902661 0.012011  
C 2.704624 -0.266914 0.007869  
C 1.872768 -1.377246 -0.004768  
C 0.634664 -1.559191 -0.021088  
C -1.727954 1.180817 -0.012652  
C -0.527452 1.844093 0.005575  
H 2.429529 1.865276 0.026752  
H 3.78748 -0.252267 0.020399  
H -2.736024 1.573219 -0.01875  
H -0.401992 2.918446 0.006271  
N -1.524577 -0.189469 -0.032267  
C -2.549476 -1.212294 0.03222  
H -2.142645 -2.141122 -0.374697  
H -2.878047 -1.394189 1.063123  
H -3.41312 -0.912126 -0.568259

E(B3LYP/6-31G(d)): -401.792681812  
H(B3LYP/6-31G(d)): -401.650794  
G(B3LYP/6-31G(d)): -401.693059

**71 - aniline TS (7 attack):**

C 1.621659 0.225905 0.130251  
C 2.866284 -0.229425 -0.415318  
C 3.173131 -1.608587 -0.415944  
C 2.274812 -2.529717 0.116352  
C 1.041995 -2.084311 0.670823  
C 0.83008 -0.802038 0.625489  
C 2.754758 2.020895 -0.599639  
C 3.556008 0.946309 -0.868905  
H 4.120701 -1.942357 -0.835882  
H 2.5378 -3.587704 0.103164  
H 2.911484 3.074682 -0.786988  
H 4.527401 0.983156 -1.343459  
N 1.573611 1.602078 0.002131  
C 0.524006 2.483262 0.461138  
H -0.446115 2.187734 0.049031  
H 0.457455 2.501308 1.558609  
H 0.744335 3.498464 0.122727  
C -2.033462 -0.244541 0.619271  
C -2.821342 0.909233 0.646178  
C -2.331168 -1.284926 -0.269408  
C -3.910363 1.025077 -0.220479  
H -2.598061 1.706544 1.351858  
C -3.421768 -1.158922 -1.126039  
H -1.692914 -2.162919 -0.287206  
C -4.214668 -0.007256 -1.107169  
H -4.523424 1.921583 -0.192026  
H -3.652161 -1.966185 -1.815576  
N -0.877819 -0.368972 1.466089  
H -5.065056 0.081673 -1.776918  
H -0.81775 0.378808 2.15729  
H -0.834009 -1.272272 1.938221

E(B3LYP/6-31G(d)): -689.386498695  
H(B3LYP/6-31G(d)): -689.118223  
G(B3LYP/6-31G(d)): -689.175772

#### 71 - azide TS (6 attack):

C 0.776279 -2.267522 -0.147967  
C 1.702767 -1.204961 -0.02636  
C 1.232679 0.152449 -0.028391  
C -0.138996 0.400651 -0.146574  
C -0.841679 -0.648301 -0.241831  
C -0.598751 -2.013702 -0.268845  
H 1.12478 -3.297627 -0.154217  
H -1.333318 -2.80325 -0.375414  
C 3.129321 -1.129811 0.10749  
N -3.168114 -0.061301 -0.329415  
N 2.324323 0.985584 0.098518

C 2.271134 2.433398 0.118528  
H 1.220766 2.730654 0.085398  
H 2.724664 2.830565 1.033786  
H 2.78792 2.86229 -0.748144  
C 3.460367 0.200545 0.17835  
H 3.827466 -1.955258 0.148208  
H 4.431304 0.666767 0.2817  
N -2.954123 1.155879 -0.220338  
N -2.521625 2.21095 -0.244627  
C -3.988203 -0.675921 0.730131  
H -3.986573 -1.748154 0.533517  
H -3.568335 -0.492393 1.725718  
H -5.021407 -0.312319 0.693302

E(B3LYP/6-31G(d)): -605.889334006  
H(B3LYP/6-31G(d)): -605.69034  
G(B3LYP/6-31G(d)): -605.74706

#### 71 - azide TS (7 attack):

C 1.510239 -2.236977 0.161121  
C 1.969469 -0.900467 0.090129  
C 1.026001 0.174459 -0.048268  
C -0.329745 -0.148269 -0.090911  
C -0.622355 -1.38024 -0.030598  
C 0.141468 -2.534574 0.10344  
H 2.224881 -3.05104 0.258106  
H -0.238595 -3.548542 0.150459  
C 3.265814 -0.284767 0.118076  
N -2.812643 0.794587 -0.404729  
C -3.305273 1.730723 0.617931  
N 1.727474 1.359593 -0.109575  
C 1.134944 2.678065 -0.189664  
H 1.029289 3.139593 0.800944  
H 1.75138 3.32845 -0.817569  
H 0.144719 2.58585 -0.642529  
C 3.076687 1.06876 -0.002035  
H 4.222908 -0.781733 0.203568  
H 3.803054 1.870178 -0.028214  
H -2.786474 2.674017 0.444888  
H -3.089021 1.379297 1.632989  
N -3.094082 -0.398356 -0.249814  
N -2.946817 -1.540929 -0.219908  
H -4.383151 1.899383 0.510213

E(B3LYP/6-31G(d)): -605.885600771  
H(B3LYP/6-31G(d)): -605.686636  
G(B3LYP/6-31G(d)): -605.742367

**71 - p-cresol TS (6 attack):**

C 2.592079 -0.186459 0.116265  
 C 2.855725 1.092227 -0.474251  
 C 1.857373 2.090979 -0.430753  
 C 0.640566 1.809785 0.185252  
 C 0.548231 0.515328 0.699937  
 C 1.384846 -0.548207 0.74443  
 C 4.672378 -0.216783 -0.740521  
 C 4.183978 1.038731 -1.009433  
 H 2.034448 3.071436 -0.86491  
 H -0.155561 2.543749 0.255423  
 H 5.63594 -0.649015 -0.978207  
 H 4.714721 1.826797 -1.527513  
 N 3.728142 -0.962235 -0.067364  
 C 3.876044 -2.32524 0.397872  
 H 2.934018 -2.610107 0.871494  
 H 4.082419 -3.008596 -0.434849  
 H 4.686499 -2.41035 1.132131  
 H -0.237443 -0.84777 1.614838  
 O -0.740178 0.056743 1.473419  
 C -1.973334 -0.073701 0.752114  
 C -2.011551 -0.741806 -0.466523  
 C -3.101995 0.482639 1.331826  
 C -3.239632 -0.853773 -1.114474  
 H -1.101093 -1.152923 -0.889069  
 C -4.321125 0.362853 0.660626  
 H -3.025202 0.991904 2.286913  
 C -4.409782 -0.30276 -0.567922  
 H -3.288916 -1.377342 -2.066005  
 H -5.21544 0.793883 1.103079  
 C -5.725325 -0.408634 -1.303305  
 H -5.777802 0.316147 -2.126125  
 H -5.860242 -1.403878 -1.740929  
 H -6.572765 -0.213308 -0.638935

E(B3LYP/6-31G(d)): -748.569481529  
 H(B3LYP/6-31G(d)): -748.287233  
 G(B3LYP/6-31G(d)): -748.348541

**71 - p-cresol TS (7 attack):**

C 1.881798 0.286272 0.126276  
 C 3.122202 0.004244 -0.529929  
 C 3.572403 -1.330682 -0.640264  
 C 2.819977 -2.377029 -0.111859  
 C 1.570927 -2.140881 0.534137  
 C 1.234425 -0.855872 0.573328  
 C 2.770981 2.23843 -0.510792  
 C 3.653893 1.279325 -0.925638

H 4.519843 -1.53051 -1.137763  
 H 3.205602 -3.392113 -0.205733  
 H 2.810726 3.314762 -0.609915  
 H 4.585846 1.457235 -1.444982  
 N 1.689678 1.651326 0.135113  
 C 0.562322 2.362096 0.70365  
 H -0.350563 2.215115 0.114797  
 H 0.375557 2.026833 1.729004  
 H 0.79669 3.428991 0.726587  
 O -0.224936 -0.807951 1.417941  
 C -1.444286 -0.539533 0.720314  
 C -2.413058 0.187414 1.396816  
 C -1.643031 -1.002061 -0.577772  
 C -3.620393 0.462865 0.749834  
 H -2.224678 0.524586 2.411084  
 C -2.855402 -0.71799 -1.202323  
 H -0.863967 -1.567499 -1.076797  
 C -3.861449 0.017017 -0.554757  
 H -4.385044 1.032045 1.27225  
 H -3.022378 -1.075418 -2.215597  
 C -5.166985 0.313474 -1.255184  
 H -5.003547 0.878769 -2.180761  
 H -5.689348 -0.61068 -1.530979  
 H -5.838305 0.899343 -0.620085  
 H -0.050632 -1.819662 1.504551

E(B3LYP/6-31G(d)): -748.551658278  
 H(B3LYP/6-31G(d)): -748.270214  
 G(B3LYP/6-31G(d)): -748.330045

**106:**

C -0.625572 -1.237592 0.000052  
 C 0.625483 -1.237587 0.000053  
 C 1.461527 -0.133658 -0.000083  
 C 0.703626 1.058433 0.000019  
 C -0.703561 1.05847 0.000018  
 C -1.461523 -0.133578 -0.000081  
 H 2.546764 -0.134878 -0.000033  
 H 1.228767 2.011304 0.000098  
 H -1.228649 2.01137 0.000104  
 H -2.546761 -0.134726 -0.00004

E(B3LYP/6-31G(d)): -230.909947901  
 H(B3LYP/6-31G(d)): -230.829175  
 G(B3LYP/6-31G(d)): -230.86198

**TS-7:**

C 3.88705 -0.588729 0.007608  
C 3.927839 0.813739 0.057264  
C 2.749902 1.580582 0.061136  
C 1.490783 0.955304 0.014997  
C 1.635804 -0.41107 -0.030146  
C 2.631483 -1.235188 -0.03941  
H 2.804754 2.665984 0.100107  
H 0.555564 1.506551 0.016605  
C -1.432141 -0.702039 -0.050956  
C -2.028264 -0.426943 1.186699  
C -2.028789 -0.236043 -1.229884  
C -3.218486 0.296113 1.237984  
H -1.559506 -0.779488 2.102277  
C -3.218949 0.486303 -1.166999  
H -1.560042 -0.44051 -2.189516  
C -3.820398 0.755457 0.064383  
H -3.677179 0.499485 2.201675  
H -3.677823 0.838331 -2.086752  
N -0.183918 -1.37593 -0.105047  
H -4.748529 1.31739 0.109054  
H -0.004534 -2.000382 0.676158  
H -0.013015 -1.879304 -0.970954  
H 4.888157 1.325544 0.093888  
H 4.824578 -1.147001 0.006739

E(B3LYP/6-31G(d)): -518.5154665  
H(B3LYP/6-31G(d)): -518.308563  
G(B3LYP/6-31G(d)): -518.361094

### 1,2-naphthalyne:

C 0.143326 0.617574 -0.000072  
C -1.027672 1.420643 -0.000047  
C -2.284447 0.851643 0.000013  
C -2.441029 -0.553032 0.00005  
C -1.337982 -1.382475 0.000023  
C -0.039244 -0.829142 -0.000003  
H -0.921647 2.502757 -0.000015  
H -3.165053 1.48808 0.000005  
H -3.439674 -0.981219 0.000053  
H -1.450715 -2.462257 0.00006  
C 2.62434 0.446786 0.000097  
C 1.454575 1.198337 0.000019  
C 1.21524 -1.465778 -0.000134  
C 2.332624 -0.926239 0.000051  
H 3.610539 0.898788 -0.000066  
H 1.528161 2.283954 -0.000027

E(B3LYP/6-31G(d)): -384.555994196  
H(B3LYP/6-31G(d)): -384.425546

G(B3LYP/6-31G(d)): -384.464583

### 3-methoxybenzyne:

C 0.473899 0.229342 -0.000221  
C -0.563984 1.194235 0.000011  
C -1.914443 0.825027 0.000161  
C -2.340627 -0.527658 0.000144  
C -1.214364 -1.312852 -0.000195  
C 0.020201 -1.092208 -0.000102  
H -2.672148 1.606029 0.000248  
H -3.379693 -0.83135 0.000166  
H -0.286822 2.244537 0.000029  
O 1.758417 0.650704 -0.000299  
C 2.747032 -0.37417 0.000301  
H 2.65655 -1.00564 -0.891831  
H 3.712032 0.13518 0.000088  
H 2.656461 -1.004686 0.893095

E(B3LYP/6-31G(d)): -345.438798323  
H(B3LYP/6-31G(d)): -345.322633  
G(B3LYP/6-31G(d)): -345.362073

### 1,2-Benzynocyclobutene:

C -0.951521 1.236972 0.000095  
C 0.30798 0.636209 0.000013  
C 0.50855 -0.757759 -0.000024  
C -0.666675 -1.486922 -0.000073  
C -1.793665 -0.93086 -0.000068  
C -2.113131 0.41758 0.000047  
H -1.073878 2.31717 0.000072  
H -3.110556 0.845065 0.000004  
C 1.811409 0.905362 -0.000152  
C 2.020386 -0.664896 0.000149  
H 2.199793 1.411108 -0.890898  
H 2.522469 -1.059563 -0.889879  
H 2.199865 1.411405 0.890387  
H 2.522313 -1.059296 0.89039

E(B3LYP/6-31G(d)): -308.292044335  
H(B3LYP/6-31G(d)): -308.175281  
G(B3LYP/6-31G(d)): -308.212046

### 4,5-indolyne:

C 0.105227 0.588284 0.000144  
C 0.301656 -0.842361 -0.000068

C -0.933915 -1.491159 -0.000379  
C -2.042295 -0.920909 -0.000515  
C -2.332515 0.444941 -0.000372  
C -1.158774 1.215522 0.000051  
C 2.320193 0.143452 -0.000016  
C 1.708304 -1.086073 0.000422  
H 3.37233 0.392029 -0.000094  
H 2.205972 -2.045073 0.000651  
N 1.369823 1.144486 0.000493  
H -1.23056 2.300708 0.000262  
H -3.317408 0.898983 -0.000484  
H 1.573623 2.131769 0.000615

E(B3LYP/6-31G(d)): -362.478194214  
H(B3LYP/6-31G(d)): -362.365973  
G(B3LYP/6-31G(d)): -362.403602

#### 4,5-NBOC-indolyne:

C -1.818782 -0.089011 0.000048  
C -2.694733 1.050287 -0.000036  
C -4.031554 0.659091 -0.000101  
C -4.394453 -0.53502 -0.000098  
C -3.644815 -1.706106 -0.000031  
C -2.265682 -1.424813 0.00006  
C -0.583685 1.831438 0.000115  
C -1.883187 2.234421 -0.000029  
H 0.327875 2.405832 0.000192  
H -2.229341 3.258365 -0.00008  
N -0.510533 0.430091 0.000119  
H -1.544755 -2.232418 0.000124  
H -4.022032 -2.72248 -0.000032  
C 0.668048 -0.328087 0.000145  
O 0.676391 -1.542256 0.00008  
O 1.734023 0.485791 -0.00014  
C 3.112355 -0.058752 -0.000045  
C 3.346464 -0.874356 1.274499  
H 2.728807 -1.773608 1.290681  
H 4.399732 -1.171647 1.326351  
H 3.120643 -0.271121 2.160509  
C 3.346416 -0.874676 -1.274405  
H 4.39971 -1.17186 -1.326356  
H 2.72886 -1.774013 -1.290238  
H 3.120356 -0.271697 -2.160525  
C 3.963593 1.212481 -0.000178  
H 3.757175 1.817714 0.888351  
H 5.026223 0.9492 -0.000073  
H 3.757275 1.817433 -0.888918

E(B3LYP/6-31G(d)): -708.312022336

H(B3LYP/6-31G(d)): -708.06404  
G(B3LYP/6-31G(d)): -708.121068

#### 5,6-indolyne:

C -0.116141 -0.682478 0.000011  
C -0.121539 0.760578 0.000021  
C 1.100242 1.490987 -0.000143  
C 2.157449 0.610774 -0.000289  
C 2.160224 -0.64494 -0.000292  
C 1.058783 -1.475692 -0.000149  
C -2.262599 0.028036 0.000226  
C -1.501313 1.16537 0.00028  
H 1.138642 2.575562 -0.000121  
H -3.33768 -0.090282 0.000319  
H -1.876643 2.179338 0.0004  
N -1.438096 -1.082648 0.000185  
H 1.045204 -2.561929 -0.00015  
H -1.753492 -2.039969 0.000266

E(B3LYP/6-31G(d)): -362.475380989  
H(B3LYP/6-31G(d)): -362.363262  
G(B3LYP/6-31G(d)): -362.400959

#### 5,6-NBOC-indolyne:

C 1.794844 -0.231084 0.000003  
C 2.736104 0.854695 -0.000001  
C 4.134921 0.620554 0.000013  
C 4.376036 -0.737703 -0.000024  
C 3.541019 -1.672178 -0.000014  
C 2.161893 -1.598634 0.000026  
C 0.651528 1.748561 -0.000024  
C 1.967907 2.077639 0.000008  
H 4.865317 1.423398 0.00001  
H -0.230689 2.367895 -0.000026  
H 2.365908 3.083338 0.000035  
N 0.511564 0.350689 -0.000007  
H 1.440561 -2.402943 0.000035  
C -0.693972 -0.356393 -0.000095  
O -0.751916 -1.569958 0.000061  
O -1.72699 0.500503 -0.000328  
C -3.125157 0.011292 0.00001  
C -3.391573 -0.794505 1.274557  
H -4.456046 -1.048587 1.327389  
H -2.810599 -1.717853 1.289247  
H -3.140171 -0.201376 2.160521  
C -3.391827 -0.795425 -1.273922  
H -2.811286 -1.719065 -1.287834

H -4.456423 -1.048991 -1.326719  
H -3.13997 -0.203093 -2.160292  
C -3.925992 1.314971 -0.00035  
H -4.99829 1.093977 0.00005  
H -3.695952 1.91208 0.887936  
H -3.69644 1.911286 -0.889293

E(B3LYP/6-31G(d)): -708.310191799  
H(B3LYP/6-31G(d)): -708.062226  
G(B3LYP/6-31G(d)): -708.119247

### 6,7-indolyne:

C 0.277881 -0.753756 -0.000114  
C 0.097662 0.674941 -0.000103  
C -1.204953 1.228287 0.000038  
C -2.352604 0.415597 0.000198  
C -1.973892 -0.918987 -0.000075  
C -0.881006 -1.527996 -0.000086  
C 2.312311 0.19849 0.000145  
C 1.419595 1.238799 -0.000124  
H -1.332668 2.308274 0.000069  
H -3.358524 0.817079 0.000229  
H 3.393282 0.211226 0.000604  
H 1.67828 2.28892 -0.000508  
N 1.628739 -1.005206 0.0  
H 2.048495 -1.921321 0.00033

E(B3LYP/6-31G(d)): -362.479676227  
H(B3LYP/6-31G(d)): -362.367491  
G(B3LYP/6-31G(d)): -362.405083

### 67-NBOC-indolyne:

C -1.411865 -0.075933 -0.000041  
C -2.743537 0.456401 -0.000119  
C -3.863282 -0.404436 -0.000097  
C -3.716679 -1.804907 0.000015  
C -2.371496 -2.145135 0.000106  
C -1.328144 -1.455978 0.000177  
C -1.269774 2.18314 -0.000145  
C -2.598961 1.893946 0.000031  
H -4.865637 0.017187 -0.000133  
H -4.564403 -2.480011 0.000067  
H -0.74416 3.12518 -0.000193  
H -3.397883 2.623227 0.000086  
N -0.521001 0.99837 -0.000069  
C 0.883689 0.994914 -0.000054  
O 1.527391 2.024395 0.000229

O 1.338422 -0.259008 -0.000258  
C 2.790741 -0.551113 -0.00001  
C 2.813469 -2.080706 -0.000986  
H 3.848651 -2.437478 -0.000149  
H 2.307353 -2.475535 0.885361  
H 2.309174 -2.474482 -0.888848  
C 3.428747 0.007974 1.274685  
H 4.474803 -0.313478 1.327592  
H 3.397727 1.098692 1.289312  
H 2.910904 -0.375633 2.160359  
C 3.429855 0.009477 -1.273505  
H 4.475477 -0.313341 -1.326595  
H 2.911825 -0.372108 -2.159961  
H 3.4001 1.100228 -1.286527

E(B3LYP/6-31G(d)): -708.312368242  
H(B3LYP/6-31G(d)): -708.064543  
G(B3LYP/6-31G(d)): -708.121914
